# Supplementary material for: Temporal and Cultivar-Specific Effects on Potato Root- and Rhizosphere Fungal Diversity
Source: Preprints.org preprint supplement (doi:10.20944/preprints202007.0218.v1), 2020-07-11
Supplement: Supplementary file 1 [file Supplementary_data_Agronomybasel2020.xlsx]

## Sheet: Table S1
Table S1. The layout of potato field, and the list of varieties.
plot III	14	Karlena		8	Solist		15	Laudine		13	Antonia		10	Madeleine		21	Merlot		5	Viviana		17	Bellefleur		19	Excellency		2	Erika		20	Manitou		1	Arielle		3	Ranomy		7	Catania		4	Esmee		11	Mariska		6
plot II	18	Rosagold		13	Antonia		19	Excellency		16	Fontane		20	Manitou		15	Laudine		2	Erika		14	Karlena		6	Glorietta		17	Bellefleur		7	Catania		21	Merlot		8	Solist		5	Viviana		12	Concordia		4	Esmee		9
plot I	1	Arielle		2	Erika		3	Ranomy		4	Esmee		5	Viviana		6	Glorietta		7	Catania		8	Solist		9	Champion		10	Madeleine		11	Mariska		12	Concordia		13	Antonia		14	Karlena		15	Laudine		16	Fontane		17
Variety	Breeding company	Maturity class	BBCH60	Plant emergence	Year	Yield kg/plot	Std.Err of Yield kg/plot
Antonia	EuroPlant	Medium early	July 16	2014-06-10	2008	44.3267	1.63586
Arielle	Agrico	Early	July 9	2014-06-04	1999	45.5333	7.91672
Bellefleur	Agrico	Late	July 22	2014-06-04	2013	53.7333	1.87735
Catania	EuroPlant	Early	July 9	2014-06-05	2011	39.1	3.72066
Champion	Agrico	Medium early	July 16	2014-06-07	2013	58.1	5.89661
Concordia	EuroPlant	Medium early	July 16	2014-06-10	2008	43.5667	3.66712
Erika	Agrico	Early	July 9	2014-06-08	2009	46.5667	10.0892
Esmee	Agrico	Early	July 9	2014-06-04	2013	65.7333	3.26718
Excellency	Agrico	Late	July 22	2014-06-07	2009	48.0333	2.34544
Fontane	Agrico	Late	July 22	2014-06-03	1999	58.3	2.57164
Glorietta	EuroPlant	Early	July 9	2014-06-05	2012	39.9	2.95691
Karlena	Norika	Medium early	July 22	2014-06-05	1997	41.6667	3.03003
Madeleine	Agrico	Medium early	July 16	2014-06-04	2004	60.7333	5.98814
Manitou	Agrico	Late	July 22	2014-06-07	2008	53.7333	6.77258
Mariska	Agrico	Medium early	July 16	2014-06-08	2010	68.4333	3.9456
Merlot	Norika	Late	July 22	2014-06-09	2013	46.8	5.03422
No 020562(Laudine)	Agrico	Medium early	July 22	2014-06-05	2014	54.8667	3.48441
Ranomi (AR 03-0221)	Agrico	Early	July 9	2014-06-02	2013	58.4	0.8544
Rosagold	Agrico	Late	July 22	2014-06-05	2010	38.4667	3.05959
Solist	Norika	Early	July 9	2014-06-02	1999	37.7667	4.29159
Viviana	EuroPlant	Early	July 9	2014-06-02	2010	52.1667	8.71882
[truncated: 9 more columns]

## Sheet: Table S2
Table S2. characteristics of the study site. Main field operations and their timings.
Pedoclimatic region	Nemoral
Country	Estonia
Location	Reola
Elevation	52 m
Latitude	58°17'02.0"
Longitude	26°43'19.6"
Farmer	Priit Einola
Plot size	7,0 m x 0,8 m
Planting date	15th May 2014
Planting density	0.7mx0.30 m
Fertilizer application		NPK rates, kg/ha
		N, kg/ha	P, kg/ha	K, kg/ha
	1) April 27th NovaTec ®classic 12:8:16 (900 kg ha-1)	108	31	120
	2) June 25th NovaTec®classic 12:8:16 (200 kg ha-1); Patentkali® (200 kg/ ha-1)	24	7	76
∑ Fertilizer application		132	38	196
Fungicide application
	July 4th Glory 450 SC (2,0 kg ha-1)
	July 9th Glory 450 SC (1,3 kg ha-1) and Leimay (0.5 l ha-1)
	Ridomil Gold MZ 68 WG (2.5 kg ha-1)
	July 17th and 23nd Infinito 687,5 SC (1,6 kg/ ha-1)
	August 1th and 18th Ranman Top (0.5 kg ha-1)
	August 11th Leimay (0.5 l ha-1)
Herbicide application	May 23th Fenix (2,2 kg ha-1); Mistral (0,3 kg ha-1)
Insecticide application	July 9th Kaiso 50 EG (0.15 kg ha-1)
	July 27th Decis 2.5 EC (0.2 l ha-1)
Crop rotation
	2014 Potato (Solanum tuberosum L.)
	2013 Spring wheat (Triticum aestivum L.)
	2012 Rapeseed (Brassica napus L.)
	2011 Spring wheat (Triticum aestivum L.)
	2010 Winter wheat (Triticum aestivum L.)
Soil analysis
Texture	sandy loam
Humus layer, cm	20-30
WRB classification	Stagnic Luvisol (LVj)

## Sheet: Table S3
Table S3. Soil properties on field site
Replication plot	P mg/kg	Mg mg/kg	Ca mg/kg	K mg/kg	pH KCl	N %	C %
1 (Arielle I replication block)	118.83	172.22	2757.22	316.23	5.3	0.13	1.14
11 (Mariska I replication block)	67.43	160.72	1036.56	132.83	5.84	0.13	1.18
21 (Merlot I replication block)	67.38	123.32	783.69	170.37	4.83	0.14	1.2
7 (Catania II replication block)	70.15	114.89	842.75	166.34	5.1	0.14	1.28
10 (Madeleine II replication block)	76	109.45	753.39	171.59	5.08	0.13	1.27
18 (Rosagold II replication block)	43.86	107.76	876.76	146.48	5.32	0.14	1.26
9 (Champion III replication block)	75.68	120.1	803.62	217.72	5.1	0.15	1.39
14 (Karlena III replication block)	51.21	127.65	1094.19	169.45	5.72	0.16	1.38
20 (Manitou III replication block)	54.68	110.28	724.71	196.6	5.42	0.17	1.33
The mean value of III replication plot	60.5233	119.343	874.173	194.59	5.41333	0.16	1.37
The mean value of II replication plot	63.3367	110.7	824.3	161.47	5.16667	0.14	1.27
The mean value of I replication plot	84.5467	152.087	1525.82	206.477	5.32333	0.13	1.17

## Sheet: Table S4
Table S4. OTU table			Table S4. OTU table
seq name	Group	Functional category	Representative_sequence	Accession No.	SH	align length	Kingdom	Phylum	Class	Order	Family	Genus	Species	Read/sequences		e value	similarity%	query cover%	LK8	LK9	LK10	LK14	LK15	LK16	LK20	LK21	LK22	LK26	LK27	LK28	LK32	LK33	LK34	LK40	LK41	LK42	LK46	LK47	LK48	LK52	LK53	LK54	LK58	LK59	LK60	LK64	LK65	LK66	LK70
>c64	Otu01269	Plant pathogen	TTAAGTTCAGCGGGTAGTCCTACCTGATTTGAGATCAGATCATAAAAATAGTGTCCAAGTCAATGGACTATTAGAAGCGGTTCATCTGCATTTCCCTTGGCCACCTGTTACAGTGTCCTCAGCGATAGATAACTTATCACGCTGAGTGGAACCAAGCATAACACTGAGATCCAGCTAATGAACGAAGAGGAGCAGGTGTGAAGCTGCAAAGACCTCCAATACCAAAGTAGAACCAATCGAGTTAACAAAAGATTTACTTTGAAGATTTCATGATACTCAAACAGGCATGCTCCAAGGAATACCAAGGAGCGCAAGGTGCGTTCAAAGATTCGATGATTCACTGAATTCTGCAATTCACATTACTTATCGCATTTCGCTGCGTTCTTCATCGATGACGAG…	KJ489351	SH218651.07FU	404	Fungi	p__Basidiomycota	c__Agaricomycetes	o__Cantharellales	f__Ceratobasidiaceae	g__unidentified	s__Ceratobasidiaceae_sp	1075	308754 Ceratobasidiaceae_sp	1.17964e-164	0.99	98.5149	0	0	0	0	0	0	0	0	0	0	0	0	3	0	0	0	0	0	0	0	0	0	0	0	0	0	0	0	0	0	0
>a19032	Otu01235	Plant pathogen	TTAAGTTCAGCGGGTAGTCCTACCTGATTTGAGATCAGATCATAATAATAGTGTCCAAGTCAATGGACTATTAGAAGCGGTTCATCTGCATTTACCTTGGCCACTTTTTACAGTGTCCTCAGCGATAGATAATTTATCACGCTGAGTGGAACCAAGCATAACACTGAGATCCAGCTAATACACAAAGAGGAGCAGGTGTGAAGCTGCAAAAGACCTCCAATACCAAAATCAAACTAATTGAGTTAACAAAAAGATTGATTTTGAAGATTTCATGATACTCAAACAGGCATGCTCCAAGGAATACCAAGGAGCGCAAGGTGCGTTCAAAGATTCGATGATTCACTGAATTCTGCAATTCACATTACTTATCGCATTTCGCTGCGTTCTTCATCGATGACG…	AY387535	SH218646.07FU	406	Fungi	p__Basidiomycota	c__Agaricomycetes	o__Cantharellales	f__Ceratobasidiaceae	g__Rhizoctonia	s__Rhizoctonia_sp	2663	308749 Ceratobasidiaceae_sp	2.006e-166	0.99	98.5222	0	2	0	0	0	0	0	0	0	0	0	0	0	0	0	0	0	0	0	6	4	29	0	0	0	0	0	0	0	0	0
>b45844	Otu02989	Plant pathogen	TTAAGTTCAGCGGGTAGTCCTACCTGATTTGAGATCAGATCATAAAAATTTAATCTTGTCCAAGTCAATGGACTATTAGAAGCGGTTCATCTGCATTTACCTTGGCCACCTTTTACAGTGTCCTCAGCGATAGATAACTTATCACGCTGAGTGGAACCAAGCATAACACTGAGATCCAGCTAATGCACAAAGAGGAGCAGGTGTGAAGCTGCAATAACCTCCAATACCAAAGTAGAAACCAATTGAATTAACAAAAGATTTACTTTGAAGATTTCATGATACTCAAACAGGCATGCTCCAAGGAATACCAAGGAGCGCAAGGTGCGTTCAAAGATTCGATGATTCACTGAATTCTGCAATTCACATTACTTATCGCATTTCGCTGCGTTCTTCATCGGT…	HQ248215	SH030654.07FU	410	Fungi	p__Basidiomycota	c__Agaricomycetes	o__Cantharellales	f__Ceratobasidiaceae	g__Thanatephorus	s__Thanatephorus_cucumeris	4	326152 Thanatephorus_cucumeris	1.90959e-158	0.97	98.5366	0	0	0	0	0	0	0	0	0	0	0	0	0	0	0	0	0	0	0	0	0	0	0	0	0	0	0	0	0	0	0
>d7971	Otu00003	Plant pathogen	TTAAGTTCAGCGGGTAGTCCTACCTGATTTGAGGTCAAAATGTCAAAGGCCAATTCAATTAAGAATAAAACCCTCATTGTCGCAGTAAAGGACGATTAGAAGCAGAACCTCGTAACAATAAAGTGCTTCACAAGACCAACAGCGTAGATAATTATCACACCGTAGTCTGGTCCACAAGAGGTTCCAGCTAATGCATTTAAAGAGGAGTCGATCTCGTTAGAGACCGGCACACTCCAAAGTCCAAGCCTCGTAAAGTCTGTAAACAAACGATTCAAAGTTGAGAATTTAATGACACTCAAACAGGCATGCTCCCCGGAATACCAGGGAGCGCAAGGTGCGTTCAAAGATTCGATGATTCACTGAATTCTGCAATTCACATTACTTATCGCATTTCGCTGC…	AB127949	SH209584.07FU	423	Fungi	p__Basidiomycota	c__Agaricomycetes	o__Agaricales	f__Typhulaceae	g__Typhula	s__Typhula_ishikariensis	224	304977 Typhula_ishikariensis	4.76802e-173	0.99	98.5816	0	0	0	0	0	0	0	0	0	0	0	0	0	0	0	0	0	0	0	0	0	0	0	0	0	0	0	0	0	0	0
>b110800	Otu03706	Plant pathogen	TTAAGTTCAGCGGGTAGCCCTACCTGATTTGAGGTCAAAATGTCAATAAGAGGTAAAGGGCAAGATTGTAACACAAGAGGCGAACCCCTTGAAAGCAACCCCACCACCACACTCTATACTGTCCTTTGAAAGGGACGATTAGAAGCAGAACCCCATAGTTAAATTCGCAGCGCAACACACCACAGTGTGGCACCACAAAGAGGTTCCAGCTAATGCATTTAAAGAGGAGCCAACAACCTAACTAAAGGTTTACCGGCACAAACTCCAAGATCCAAGCCACAAGAACTACGTTAATAAAAACATAGTGTGGTTGAGAATTTAATGACACTCAAACAGGCATGCTCCCCGGAATACCAGGGAGCGCAAGGTGCGTTCAAAGATTCGATGATTCACTGAATT…	AF193374	SH183712.07FU	456	Fungi	p__Basidiomycota	c__Agaricomycetes	o__Agaricales	f__Typhulaceae	g__Typhula	s__Typhula_sp	2	293710 Typhula_incarnata	6.17217e-162	0.93	98.6842	0	0	0	0	0	0	0	0	0	0	0	0	0	0	0	0	0	0	0	0	0	0	0	0	0	0	0	0	0	0	0
>a11142	Otu01713	Saprotroph	TTAAGTTCAGCGGGTAGTCCTACCTGATTTGAGGTCAAGTATTCAAATAGTTAGTCTCACAGAGACAATTGGAAGCTGAACAACACAGAGCAATCCCCTCGCCAGTGTAGATAATTTATCACACTTGTGGCAGATCGCAAACGGTTCCGCTAATGCATTTCAGAGGAGCTGACTGCAAAGCCAGCAAACCTCCACAATCCAAGCTCTCGTATACAAAACAGTATAAGAGAGTTGAGAATTTAATGACACTCAAACAGGCATGCTCCTCGGAATACCAAGGAGCGCAAGATGCGTTCAAAGATTCGATGATTCACTGAATTCTGCAATTCACATTACTTATCGCATTTCGCTGCGTTCTTCATCGATGACGAGTCTAG	JF715065	SH174689.07FU	377	Fungi	p__Basidiomycota	c__Agaricomycetes	o__Agaricales	f__Agaricaceae	g__Agaricus	s__Agaricus_sp	26	289807 Agaricus_comtulus	9.92963e-153	0.99	98.4085	0	0	0	0	0	0	0	0	0	2	0	0	0	0	0	0	0	0	0	0	0	0	0	0	0	0	0	0	0	3	0
>a21037	Otu01243	Saprotroph	TTAAGTTCAGCGGGTAGTCCTACCTGATTTGAGGTCAAATTGTCATTTATGTTGTCCCGAGAGACGGTTAGAAGCAGCGCAAACCCATTATAGCAGACGTCCACGGCGTAGATAATTATCACACCAATAGACGGTTCCACTGCGGGGCACCGGCTAATACATTTAAGGGGAGCAGACTAATGAAAGCCAGCAAAAAGACCCCCAAGTCCAAGCCATTATCAGCAAAAGCTAATAAGGTTGAGAATTTAATGACACTCAAACAGGCATGCTCCTCGGAATACCAAGGAGCGCAAGGTGCGTTCAAAGATTCGATGATTCACTGAATTCTGCAATTCACATTACTTATCGCATTTCGCTGCGTTCTTCATCGATGACGAGTCTAG	UDB011682	SH176907.07FU	383	Fungi	p__Basidiomycota	c__Agaricomycetes	o__Agaricales	f__Strophariaceae	g__Agrocybe	s__Agrocybe_sp	1512	290793 Agrocybe_pediades	1.20098e-141	0.98	92.4282	0	0	0	0	0	0	2	0	0	0	0	0	0	0	0	2	0	0	0	0	0	0	0	0	0	0	0	0	0	0	0
>a106829	Otu01411	Saprotroph	TTAAGTTCAGCGGGTAGTCCTACCTGATTTGAGGTCAAATTGTCATTTGTATTGTCCGAGAGGACGATTGGAAGCAGCGCAAAGACCCATTAAAAGCAGACATCCACGGCGTAGATAATTATCACACCAATAGACGGTCCACTGCGGGGCGCCAGCTAATACATTTAAGGGGAGCAGACTAATGAAAGCCAGCAAAAGACCCCCAAGTCCAAGCCATTATCAGCAAAAGCTAATAAGGTTGAGAATTTAATGACACTCAAACAGGCATGCTCCTCGGAATACCAAGGAGCGCAAGGTGCGTTCAAAGATTCGATGATTCACTGAATTCTGCAATTCACATTACTTATCGCATTTCGCTGCGTTCTTCATCGATGACGAGTCTAG	UDB015619	SH176909.07FU	384	Fungi	p__Basidiomycota	c__Agaricomycetes	o__Agaricales	f__Strophariaceae	g__Agrocybe	s__Agrocybe_sp	97	290795 Agrocybe_praecox	8.04447e-156	0.99	98.4375	0	0	0	0	0	0	0	0	0	0	0	0	0	0	0	0	0	0	0	0	0	0	0	0	0	0	0	0	0	0	0
>c11982	Otu03082	Saprotroph	TTAAGTTCAGCGGGTAGTCCTACCTGATTTGAGGTCAAATTGTCATTTATGTTGTCCCGAGAGACGGTTAGAAGCAGCGCAAACCCATTATAGCAGACGTCCACGGCGTAGATAATTATCACACCAATAGACGGTTCCACTGCGGGGCACCGGCTAATACATTTAAGGGGAGAAGACTAAAGAAAGCCCCCCAAGTCCAAGCCATTATCAGCAAAAGCTAATAAGGTTGAGAATTTAATGACACTCAAACAGGCATGCTCCTCGGAATACCAAGGAGCGCAAGGTGCGTTCAAAGATTCGATGATTCACTGAATTCTGCAATTCACATTACTTATCGCATTTCGCTGCGTTCTTCATCGATGACGAGTCTAG	UDB015619	SH176909.07FU	372	Fungi	p__Basidiomycota	c__Agaricomycetes	o__Agaricales	f__Strophariaceae	g__Agrocybe	s__Agrocybe_sp	3	290795 Agrocybe_praecox	7.9421e-125	0.92	98.3871	0	0	0	0	0	0	0	0	0	0	0	0	0	0	0	0	0	0	0	0	0	0	0	0	0	0	0	0	0	0	0
>c6207	Otu03508	Saprotroph	TTAAGTTCAGCGGGTAGTCCTACCTGATTTGAGGTCAAATTGTCATTTATGTTGTCCCGAGAGACGGTTAGAAGCAGCGCAAACCCATTATAGCAGACGTCCACGGCGTAGATAATTATCACACCAATAGACGGTTCCACTGCGGGGAGCAGACTAATGAAAGCCAGCAAAAAGACCCCCAAGTCCAAGCCATTATCAGCAAAAGCTAATAAGGTTGAGAATTTAATGACACTCAAACAGGCATGCTCCTCGGAATACCAAGGAGCGCAAGGTGCGTTCAAAGATTCGATGATTCACTGAATTCTGCAATTCACATTACTTATCGCATTTCGCTGCGTTCTTCATCGATGACGAGTCTAG	UDB011682	SH176907.07FU	360	Fungi	p__Basidiomycota	c__Agaricomycetes	o__Agaricales	f__Strophariaceae	g__Agrocybe	s__Agrocybe_sp	3	290793 Agrocybe_pediades	1.14403e-110	0.92	91.9444	0	0	0	0	0	0	0	0	0	0	0	0	0	0	0	0	0	0	0	0	0	0	0	0	0	0	0	0	0	0	0
>c141149	Otu03509	Saprotroph	TTAAGTTCAGCGGGTAGTCCTACCTGATTTGAGGTCAAATTGTCATTTATGTTGTCCCGAGAGACGGTTAGAAGCAGCGCAAACCCATTATAGCAGCAGTCCACGGCGTAGATAATTATCACACCACTAGACGGTTCCACTGCGGGGGAGCAGACTAATGAAAGCCAGCAAAAAGACCCCCAAGTCCAAGCCATTATCAGCAAAAGCTAATAAGGTTGAGAATTTAATGACACTCAAACAGGCATGCTCCTCGGAATACCAAGGAGCGCAAGGTGCGCTCAAAGATTCGATGATTCACTGAATTCTGCAATTCACATTACTTATCGCATTTCGCTGCGTTCTTCATCGATGACGAGTCTAG	UDB011682	SH176907.07FU	361	Fungi	p__Basidiomycota	c__Agaricomycetes	o__Agaricales	f__Strophariaceae	g__Agrocybe	s__Agrocybe_sp	2	290793 Agrocybe_pediades	1.88266e-108	0.91	91.9668	0	0	0	0	0	0	0	0	0	0	0	0	0	0	0	0	0	0	0	0	0	0	0	0	0	0	0	0	0	0	0
>c57177	Otu04339	Saprotroph	TTAAGTTCAGCGGGTAGTCCTACCTGATTTGAGGTCAAATTGTCATTTATGTTGTCCCGAGAGACGGTTAGAAGCAGCGCAAACCCATTATAGCAGACGTCCACGGCGTAGATAATTATCACACCAATAGACTGTTCCACTGCGGGGCACCGACTAATGAAAGTCAGCAAAAAGGCCCCCAAGTCCAAGCCATTATCAGCAAAAGCTAATAAGGTTGAGAATTTAATGACACTCAAACAGGCATGCTACTCGGAATACCAAGGAGCGCAAGGTGCGTTCAAAGATTCGATGATTCACTGAATTCTGCAATTCACATTACTTATCGCATTTCGCTGCGTTCTTCATCGATGACGAGTCTAG	UDB011682	SH176907.07FU	360	Fungi	p__Basidiomycota	c__Agaricomycetes	o__Agaricales	f__Strophariaceae	g__Agrocybe	s__Agrocybe_sp	2	290793 Agrocybe_pediades	4.00205e-107	0.91	91.9444	0	0	0	0	0	0	0	0	0	0	0	0	0	0	0	0	0	0	0	0	0	0	0	0	0	0	0	0	0	0	0
>c33527	Otu04340	Saprotroph	TTAAGTTCAGCGGGTAGCCCTACCTGATTTGAGGTCAAATTGTCATTTATGTTGTCCCGAGAGACGGTTAGAAGCAGCGCAAACCCATTATAGCAGACGTCCACGGCGTAGATAATTATCACACCAATAGACGGTTCCACTGCGGGGCGCAGACTAATGCATGCCAGCAAAAAGACCCCCAAGTCCAAGCCATTATCAGCAAAAGCGAATAAGGTTGAGAATTTAATGACACTCAAACAGGCATGCTCCTCGGAATACCAAGGAGCGCAAGGTGCGTTCAAAGATTCGATGATTCACTGAATTCTGCAATTCACATTACTTATCGCATTTCGCTGCGTTCTTCATCGATGACGAGTCTAG	UDB011682	SH176907.07FU	360	Fungi	p__Basidiomycota	c__Agaricomycetes	o__Agaricales	f__Strophariaceae	g__Agrocybe	s__Agrocybe_sp	2	290793 Agrocybe_pediades	5.20381e-108	0.91	91.9444	0	0	0	0	0	0	0	0	0	0	0	0	0	0	0	0	0	0	0	0	0	0	0	0	0	0	0	0	0	0	0
>c11310	Otu04433	Saprotroph	TTAAGTTCAGCGGGTAGTCCTACCTGATTTGAGGTCAAATTGTCATTTGTGTTGTCCCGAGAGACGGTTAGAAGCAGCGCAAACCCATTATAGCAGACGTCCACGGCGTAGATAATTATCACACCAATAGACGGTTCCACTGCGGGGAGCCGGGAAAAAGACCCCCAAGTCCAAGCCATTATCAGCAAAAGCTAATAAGGTTGAGAATTTAATGACACTCAAACAGGCATGCTCCTCGGAATACCAAGGAGCGCAAGGTGCGTTCAAAGATTCGATGATTCACTGAATTCTGCAATTCATATTACTTATCGCATTTCGCTACGTTCTTCATCGATGACGAGTCTAG	UDB015619	SH176909.07FU	346	Fungi	p__Basidiomycota	c__Agaricomycetes	o__Agaricales	f__Strophariaceae	g__Agrocybe	s__Agrocybe_sp	2	290795 Agrocybe_praecox	9.37586e-91	0.86	98.2659	0	0	0	0	0	0	0	0	0	0	0	0	0	0	0	0	0	0	0	0	0	0	0	0	0	0	0	0	0	0	0
>b91222	Otu01614	Saprotroph	TTAAGTTCAGCGGGTAGTCCTACCTGATTTGAGGTCAAAATGTCAATTAAGAATTGTCCAAGGACAGTTAGAAGCAAATCCTTCAAGATTGTTTCACAACAGCGATGTAGATAATTATCACATCAAAGCTGATCCACAAAGGTTTCGCTAATGCATTTAAAGAGGAGCTGACTCTATGAGAAGCCAGCACACTCCAAATCCAAGCTTTATCAGAGTTTACAAGAAAATCTGAAAAGTTGAGAATTTAATGACACTCAAACAGGCATGCCCCTCGGAATACCAAGGGGCGCAAGGTGCGTTCAAAGATTCGATGATTCACTGAATTCTGCAATTCACATTACTTATCGCATTTCGCCACGTTCTTCATCGATGACGAGTCTAG	U66455	SH461977.07FU	382	Fungi	p__Basidiomycota	c__Agaricomycetes	o__Agaricales	f__Tricholomataceae	g__Arrhenia	s__Arrhenia_sp	49	328362 Arrhenia_velutipes	1.63696e-115	0.88	98.4293	0	0	0	0	0	0	0	0	0	0	0	0	0	0	0	0	0	0	0	0	0	0	0	0	0	0	0	0	0	0	0
>c37756	Otu02683	Saprotroph	TTAAGTTCAGCGGGTAGTCCTACCTGATTTGAGGTCAAAATGTCAATGAGTTGTCCAAGAGGGACTGTTGGAAGCAATCCACCTTCAAATTTGTCACTGCAATGGTGTAGATAATTATCACACCAATGCTGATCCACGAAGGGGTCCACTAATGCATTTAAAGAGGAGCCAACTCCTTTTGAAGCCAGCACACTCCAAGTCCAAGCTTTCCAAAAGTTCACAAGAAACTTGGAAAGTTGAGAATTTAATGACACTCAAACAGGCATGCTCCTCGGAATACCAAGGAGCGCAAGGTGCGTTCAAAGATTCGATGATTCACTGAATTCTGCAATTCACATTACTTATCGCATTTCGCTGCGTTCTTCATCGTTGACGAGTCTAG	U66455	SH461977.07FU	382	Fungi	p__Basidiomycota	c__Agaricomycetes	o__Agaricales	f__Tricholomataceae	g__Arrhenia	s__Arrhenia_sp	5	328362 Arrhenia_velutipes	2.52689e-105	0.86	98.4293	0	0	0	0	0	0	0	0	0	0	0	0	0	0	0	0	0	0	0	0	0	0	0	0	0	0	0	0	0	0	0
>d39454	Otu02691	Saprotroph	TTAAGTTCAGCGGGTAGTCCTACCTGATTTGAGGCCAAAGCTTTAAATGTAATGTTGTCCACGAGGGACGATTGGAAGCAGCGCACACAGAAGAGGCCTAAGGCATAACGGCGCAGATAATTATCACACCATGCCGAGCACTCTAACGAGCACAAGCTAATGCATTTCAGGACGAGCCAATTACGGCACGATCCAAATCCACGACCCACGATTTTGACATCGCAGGTGTGAGGGTTTACGTGACACTCAAACAGGCATGCTCCATGGAATACCAAGGAGCGCAAGATGCGTTCAAAGATTCGATGATTCACTGAATTCTGCAATTCACATTACTTATCGCATTTCGCTACGTTCTTCATCGATGACGAGTCTAG	JX135079	SH024175.07FU	374	Fungi	p__Basidiomycota	c__Agaricomycetes	o__Auriculariales	f__Incertae_sedis	g__Auricularia	s__Auricularia_sp	6	322989 Auricularia_sp	2.10796e-151	0.99	98.3957	0	0	0	0	0	0	0	0	0	0	0	0	0	0	0	0	0	0	0	0	0	0	0	0	0	0	0	0	0	0	0
>c11525	Otu02680	Saprotroph	TTAAGTTCAGCGGGTAGTCCTACCTGATTTGAGGTCAAGAAGTTCATTAATGTTGTCCAACAAGGGACTATTAGCAGCTGAACTAGTCAGAGAGCAATCATCACAGTGTAGATAATTATCACACTAGTGACGGGACTGCAAACGGTTCCGCTAATGTATTTCAGGAGAGCCGACCTCTTAATAAAGGCCCGCAAACCCCCATATCCAAGCCCATCACAACTCGCAAAAGCTGGAGGGTTGAGAATTTAATGACACTCAAACAGGCATGCTCCTCGGAATACCAAGGAGCGCAAGGTGCGTTCAAAGATTCGATGATTCACTGAATTCTGCAATTCACATTACTTATCGCATTTCGCTGCGTTCTTCATCGATGACGAGTCTAG	DQ112621	SH175881.07FU	383	Fungi	p__Basidiomycota	c__Agaricomycetes	o__Agaricales	f__Agaricaceae	g__Bovista	s__Bovista_promontorii	2	290274 Bovista_promontorii	1.71043e-154	0.99	98.4334	0	0	0	0	0	0	0	0	0	0	0	0	0	0	0	0	0	0	0	0	0	0	0	0	0	0	0	0	0	0	0
>d141916	Otu02668	Saprotroph	TTAAGTTCAGCGGGTAGTCCTACCTGATTTGAGGTCGATCAATAAATTGTTTTGCCTCAAGAGAGACAGTCCGAAGACAGTTTGAAGCTGAACACAAAGAGGAAATCTAGCGACAGCATAGATAAATATTTCTTATCAAACTGAGGCCAGTCCTGCACTGCTCTGCTAATGCATTTAAAAGGAGCTGACAGTTATTTGCGCCAGCAAAACCTTCAATATCCAAGCACAAGAAACAAAGTTTTCTTGTGTTGAGAGATTAATGACACTCAAACAGGCATACCCTCCAGAATACCAGAGGGTGCAAGGTGCGTTCAAAGGTTCGATGATTCACTGAATTCTGCAATTCACATTACATATCGCAATTCGCCACGTTCTTCATCGA	HM240142	SH185111.07FU	382	Fungi	p__Basidiomycota	c__Agaricomycetes	o__Agaricales	f__Clavariaceae	g__Clavaria	s__Clavaria_sp	4	294336 Clavaria_sp	3.52801e-149	0.97	99.7382	0	0	0	0	0	0	0	0	0	0	0	0	0	0	0	0	0	0	0	0	0	0	0	0	0	0	0	0	0	0	0
>d82094	Otu01903	Saprotroph	TTAAGTTCAGCGGGTAGTCCTACCTGATTTGAGGTCAGATTGTCAAGTATTGTCCCAAAGGACGATTAGAAGCTTAGCTTCAATATGTCGCCTCTCAATGGCGTAGATAATTATCACACCAGAGGTTAGCGGCAAAAGCTCTGCTAATGCATTTAAGGATAGCCGACTTTGTGAAGCCCGCAGATCCCAAGATCCAAGCTATACAGGTTTCAAAAACTTGTATAGTTGAGAATTTAATGACACTCAAACAGGCATGCTCCTCGGAATACCAAGGAGCGCAAGGTGCGTTCAAAGATTCGATGATTCACTGAATTCTGCAATTCACATTACTTATCGCATTTCGCTGCGTTCTTCATCGTTGACGAGTCTAG	DQ672271	SH190265.07FU	371	Fungi	p__Basidiomycota	c__Agaricomycetes	o__Agaricales	f__Entolomataceae	g__Clitopilus	s__Clitopilus_sp	26	296724 Clitopilus_sp	5.28667e-139	0.96	98.3827	0	0	0	0	0	0	0	0	0	0	0	0	0	0	0	0	0	0	0	0	0	0	0	0	0	0	0	0	0	0	0
>c66828	Otu02136	Saprotroph	TTAAGTTCAGCGGGTAGTCCTACCTGATTTGAGGTCAGATTGTCAAATGTTGTCCCAAAGGACGATTAGAAGCTTAGCTTTAAGATGTTGCCTCTCAATGGCGTAGATAATTATCACACCAGAGGTTAGCGACAAAAGCTCTGCTAATGCATTTAAGGATAGCCGACTTTGTAAAAAGCCCGCAGATCCCAAGGTCCAAGCTATACAGGTTGAAAAACTTGTATAGTTGAGAAGTTAATGACACTCAAACAGGCATGCTCCTCGGAATACCAAGGAGCGCAAGGTGCGTTCAAAGATTCGATGATTCACTGAATTCTGCAATTCACATTACTTATCGCATTTCGCTGCGTTCTTCATCGGTGACGAGTCTAG	DQ672271	SH190265.07FU	372	Fungi	p__Basidiomycota	c__Agaricomycetes	o__Agaricales	f__Entolomataceae	g__Clitopilus	s__Clitopilus_sp	13	296724 Clitopilus_sp	8.18676e-129	0.93	98.3871	0	0	0	0	0	0	0	0	0	0	0	0	0	0	0	0	0	0	0	0	0	0	0	0	0	0	0	0	0	0	0
>b31121	Otu01888	Saprotroph	TTAAGTTCAGCGGGTAGTCCTACCTGATTTGAGGTCAGATGGTCAAAATATTTTGTCTTGTGAAAGACGATTAGAAAGCGAAACTCCATTCATGCCGCGCACTAATGGCGTAGATATCTATCACACCAAAAAGTTAGCGGCAAAAAGTTCTGCTAATGTATTTAAGAATAGCCGACTCGTGAAAGCCCGCAAATCCCATGATCCAATCCAATCCAAGTTAGAAAAATAAACTCGTTTGGTTGAGAATTTAATGACACTCAAACAGGCATGCTCCTCGGAATACCAAGGAGCGCAAGGTGCGTTCAAAGATTCGATGATTCACTGAATTCTGCAATTCACATTACTTATCGCATTTCGCTGCGTTCTTCATCGATGACGAGTCTAG	KC176292	SH010475.07FU	385	Fungi	p__Basidiomycota	c__Agaricomycetes	o__Agaricales	f__Entolomataceae	g__Clitopilus	s__Clitopilus_sp	5	316380 Clitopilus_sp_2_T_785	9.77154e-114	0.89	98.4416	0	0	0	0	0	0	0	0	0	0	0	0	0	0	0	0	0	0	0	0	0	0	0	0	0	0	0	0	0	0	0
>c6279	Otu03449	Saprotroph	TTAAGTTCAGCGGGTAGTCCTACCTGATTTGAGGTCAGATGGTCAAAATATATTGTCTTGTGAAAGACGATTAGAAGCGAAGCTCCATTCATGCCGCGCACTAATGGCGTAGATATCTATCACACCAAAGTTAGCGGCAAAAGTTCTGCTAATACATTTAAGAATAGCTGACTCGTGAGAGCCCGCAAATCCCATGATCCAATCCAATCCAAGTTAGAAAAATAAACTCGTTTGGTTGAGAATTTAATGACACTCAAACAGGCATGCTCCTCAGAATACCAAGGAGCACAAGGTGCGTTCAAAGATTCTATGATTCACTGAATTCTGCAATTCACATTACTTATCGCATTTCGCTACGTTCTTCATCGATGACGAGTCTAG	KC176292	SH010475.07FU	381	Fungi	p__Basidiomycota	c__Agaricomycetes	o__Agaricales	f__Entolomataceae	g__Clitopilus	s__Clitopilus_sp	3	316380 Clitopilus_sp_2_T_785	2.05854e-112	0.89	98.4252	0	0	0	0	0	0	0	0	0	0	0	0	0	0	0	0	0	0	0	0	0	0	0	0	0	0	0	0	0	0	0
>c156264	Otu03437	Saprotroph	TTAAGTTCAGCGGGTAGTCCTACCTGATTTGAGGTCAGATTGTCAAAGTAAATGTCATAGGGTAACAACAATTAGGAGCAAAGCTTCAAGACACGCTAACCTGTAATGGCGATGATAGTTATCACACCAAAAGAAGGTCGGCACGAAGCCCCGCTAATGTGTTTAAGGACAGCAGACCGTTGTAAAAGCCTGCAACATCCCATGTCCAAGCCATGCATAGTCAGCTAAGACTTGCACAGTTGAGAATTTAATGACACTCAAACAGGCATGCTCCTCAGAATACCAAGGAGCGCAAGGTGCGTTCAAAGATTCGATGATTCACTGAATTCTGCAATTCACATTACTTATCGCATTTCGCTGCGTTCTTCATCGTTGACGAGTCTAG	FJ770400	SH018249.07FU	385	Fungi	p__Basidiomycota	c__Agaricomycetes	o__Agaricales	f__Entolomataceae	g__Clitopilus	s__Clitopilus_sp	2	319984 Clitopilus_popinalis	1.16004e-102	0.85	98.4416	0	0	0	0	0	0	0	0	0	0	0	0	0	0	0	0	0	0	0	0	0	0	0	0	0	0	0	0	0	0	0
>a38403	Otu01262	Saprotroph	TTAAGTTCAGCGGGTAGTCCTACCTGATTTGAGGTCAAAATGATTCAAGTTGTCTTTGCAGACAGTTGAGAAGCGGATACCCTCAAAAGCAACAACCACAGTAAGATATTTATCACACTGATAGTTGGATTTGCCGAGGCATTCCAGCTAATTCATTTCAGGGGAGTAGGTTGTAACGCCCACAATAAACCCCCACATCCAACCTGCTAACAACAAAAGTTGTAGAGATTGAGAATTTAATGACACTCAAACAGGCATGCTCCTCGGAATACCAAGGAGCGCAAGGTGCGTTCAAAGATTCGATGATTCACTGAATTCTGCAATTCACATTACTTATCGCATTTCGCTGCGTTCTTCATCGATGACGAGTCTAG	JX968209	SH179180.07FU	374	Fungi	p__Basidiomycota	c__Agaricomycetes	o__Agaricales	f__Bolbitiaceae	g__Conocybe	s__Conocybe_apala	1304	291809 Conocybe_apala	2.74095e-152	0.99	98.3957	0	0	0	0	0	0	0	0	0	0	0	0	0	0	0	2	0	0	2	0	0	0	0	0	0	0	0	0	0	0	0
>b111269	Otu01949	Saprotroph	TTAAGTTCAGCGGGTAGTCCTACCTGATTTGAGGTCAAAATGATTCAAGTTGTCTTTGCAGACAGTTGAGAAGCGGATACCCTCAAAAGCAACAACCACAGTAAGATATTTATCACACTGATAGTTGGATTTGCCGAGGCATTCCAGCTAGTTCATTTCAGGGGAGTAGGTTGTAATGCCCACAATAAACCCCCACATCCAACCTGCTAACAACAAAAGTTGTAGAGATTGAGAATTTAATGACACTCAAACAGGCATGCTCCTCGGAATACCAAGGAGCGCAAGGTGCGTTCAAAGATTCGATGATTCACTGAATTCTGCAATTCACATTACTTATCGCATTTCGCTGCGTTCTTCATCGTTGACGAGTCTAG	JX968209	SH179180.07FU	374	Fungi	p__Basidiomycota	c__Agaricomycetes	o__Agaricales	f__Bolbitiaceae	g__Conocybe	s__Conocybe_apala	9	291809 Conocybe_apala	1.24676e-149	0.98	98.3957	0	0	0	0	0	0	0	0	0	0	0	0	0	0	0	0	0	0	0	0	0	0	0	0	0	0	0	0	0	0	0
>a173	Otu01322	Saprotroph	TTAAGTTCAGCGGGTAGTCCTACCTGATTTGAGGTCAAAATGTTTCAAATTGTCTTAGAAAGACGGTTGAGAAGCAGATCCCCTATTGCATCAACTCCAGCATAGATAATTATCATACTGATAGTTGGTTTGCAAAGGCATTCCAGCTAATACATTTCAGGGGAGTGGAACTTGTAAAAGACCCACATAAACCCCCACATCCAATCTACAAACATTACAAGAATGTTGAGATTGAGAATTTAATGACACTCAAACAGGCATGCTCCTCGGAATACCAAGGAGCGCAAGGTGCGTTCAAAGATTCGATGATTCACTGAATTCTGCAATTCACATTACTTATCGCATTTCGCTGCGTTCTTCATCGATGACGAGTCTAG	JX968172	SH221744.07FU	377	Fungi	p__Basidiomycota	c__Agaricomycetes	o__Agaricales	f__Bolbitiaceae	g__Conocybe	s__Conocybe_sp	388	310214 Conocybe_watlingi	2.59155e-144	0.97	98.4085	0	0	0	0	0	0	0	0	3	0	0	0	0	0	0	0	0	0	0	0	0	0	0	0	0	0	0	0	0	0	0
>a124855	Otu01413	Saprotroph	TTAAGTTCAGCGGGTAGTCCTACCTGATTTGAGGTCAAGATGGTCATATAGAATTGTCTTGCGACGATTTATGAAGCAGATACCCTCATGCAACAACTACAGTATAGATAATTATCACACTGATAGTCAGATATGCAGAGGCATTCCAGCTAATGCATTTAAGGGGAGTGAGGAATTAGATTCCACACAATAAACCCCCACTTCCGATCTAGACAACACAAAGTTGTAGAGATTGAGAATTTAATGACACTCAAACAGGCATGCTCCTCGGAATACCAAGGAGCGCAAGGTGCGTTCAAAGATTCGATGATTCACTGAATTCTGCAATTCACATTACTTATCGCATTTCGCTGCGTTCTTCATCGTTGACGAGTCTAG	JX968223	SH031931.07FU	378	Fungi	p__Basidiomycota	c__Agaricomycetes	o__Agaricales	f__Bolbitiaceae	g__Conocybe	s__Conocybe_sp	110	326700 Conocybe_elegans	1.99931e-143	0.96	98.4127	0	0	0	0	0	0	0	0	0	0	0	0	0	0	0	0	0	0	0	0	0	0	0	0	0	0	0	0	0	0	0
>a89859	Otu01651	Saprotroph	TTAAGTTCAGCGGGTAGTCCTACCTGATTTGAGGTCAAGATGGTCAATAGTTGTCTTGCGACGATTGATGAAGCAGATACCCTCATGCAACAACTACAGCATAGATAATTATCACACTGATAGTCAGATATGCAGAGGCATTCCGGCTAATACATTTAAGGGGAGTGAGGAATTGGATTCCACACAAAAGACCCCCACTTCCAATCTAGACAACACAAAGTTGTTAAGATTGAGAATTTAATGACACTCAAACAGGCATGCTCCTCGGAATACCAAGGAGCGCAAGGTGCGTTCAAAGATTCGATGATTCACTGAATTCTGCAATTCACATTACTTATCGCATTTCGCTGCGTTCTTCATCGTTGACGAGTCTAG	JX968236	SH220680.07FU	375	Fungi	p__Basidiomycota	c__Agaricomycetes	o__Agaricales	f__Bolbitiaceae	g__Conocybe	s__Conocybe_sp	41	309693 Conocybe_aff_ochrostriata_NL_0830	5.86422e-151	0.99	98.4	0	0	0	0	0	0	0	0	0	0	0	0	0	0	0	0	0	0	0	0	0	0	0	0	0	0	0	0	0	0	0
>b3268	Otu01481	Saprotroph	TTAAGTTCAGCGGGTAGTCCTACCTGATTTGAGGTCAAGATGGTCATATAGAATTGTCTTGCGACGATTTATGAAGCAGATACCCTCATGCAACAACTACAGCATAGATAATTATCACACTGATAGTCAGATATGCAGAGGCATTCCAGCTAATGCATTTAAGGGGAGTGAGGAATTAGATTCCACACAACAAACCCCCACTTCCAATCTAGACAACACAAAGTTGTAGAGATTGAGAATTTAATGACACTCAAACAGGCATGCTCCTCGGAATACCAAGGAGCGCAAGGTGCGTTCAAAGATTCGATGATTCACTGAATTCTGCAATTCACATTACTTATCGCATTTCGCTGCGTTCTTCATCGATGACGAGTCTAG	JX968223	SH031931.07FU	378	Fungi	p__Basidiomycota	c__Agaricomycetes	o__Agaricales	f__Bolbitiaceae	g__Conocybe	s__Conocybe_sp	24	326700 Conocybe_elegans	5.71528e-147	0.97	98.4127	0	0	0	0	0	0	0	0	0	0	0	0	0	0	0	0	0	0	0	0	0	0	0	0	0	0	0	0	0	0	0
>b44746	Otu01814	Saprotroph	TTAAGTTCAGCGGGTAGTCCTACCTGATTTGAGGTCAAGATGGTCATTAGAGTTGTCTTGCGACGGTTAATGAAGCAGATACCCTCATGCAACAACTACAGTATAGATAATTATCACACTGATAGTCAGATATGCAGAGGCATTCCAGCTAATACATTTAAGAGGAGTGAGGGATTTTCATCCCACACAAAGGACCTCCACATCCAATCTACTAAACAACAAAAGCTGTAGAGATTGAGAATTTAATGACACTCAAACAGGCATGCTCCTCGGAATACCAAGGAGCGCAAGGTGCGTTCAAAGATTCGATGATTCACTGAATTCTGCAATTCACATTACTTATCGCATTTCGCTGCGTTCTTCATCGGTGACGAGTCTAG	JX968241	SH031922.07FU	380	Fungi	p__Basidiomycota	c__Agaricomycetes	o__Agaricales	f__Bolbitiaceae	g__Conocybe	s__Conocybe_sp	18	326693 Conocybe_michiganensis	4.42287e-146	0.97	98.4211	0	0	0	0	0	0	0	0	0	0	0	0	0	0	0	0	0	0	0	0	0	0	0	6	0	0	0	0	0	0	0
>a121807	Otu01948	Saprotroph	TTAAGTTCAGCGGGTAGTCCTACCTGATTTGAGGTCAAAATGATTCACATTGTCAATAAGACGGTTAAGAAGCAGATTCCCTTCATGCAGCAACTCCAGCATAGATAATTATCACACTGATAGTTGGCTTTGCAAAGGCATTCCAGCTAATACATTTTAGGAGAGTAGAATTTTCATCCTACATAGACTCCCACATCCAATCTTCAGACAACACAAGGCTGTGAAGATTGAGAATTTAATGACACTCAAACAGGCATGCTCCTCGGAATACCAAGGAGCGCAAGGTGCGTTCAAAGATTCGATGATTCACTGAATTCTGCAATTCACATTACTTATCGCATTTCGCTACGTTCTTCATCGATGACGAGTCTAG	JX968162	SH003369.07FU	373	Fungi	p__Basidiomycota	c__Agaricomycetes	o__Agaricales	f__Bolbitiaceae	g__Conocybe	s__Conocybe_sp	17	313140 Conocybe_rostellata	4.85747e-127	0.92	98.3914	0	0	0	0	0	0	0	0	0	0	0	0	0	0	0	0	0	0	0	0	0	0	0	0	0	0	0	0	0	0	0
>d5311	Otu02305	Saprotroph	TTAAGTTCAGCGGGTAGTCCTACCTGATTTGAGGTCAAATGGATTCAAATTTGTCTTGCGACAATTAAGCAGCAGATTCCCTTCATGCAACAACTCCAGTACTGATAATTATCACACTGATAGTTGGTTTGCAAAGGCATTCCAGCTAATGCATTTTAGAGGAGTGAGTCGACAAGGCTCACAAACCCCCCACATCCAATCTTCTAACAATACAAGATTATAGAGATTGAGAATTTAATGACACTCAAACAGGCATGCTCCTCGGAATACCAAGGAGCGCAAGGTGCGTTCAAAGATTCGATGATTCACTGAATTCTGCAATTCACATTACTTATCGCATTTCGCTGCGTTCTTCATCGGTGACGAGTCTAG	JX968203	SH003383.07FU	372	Fungi	p__Basidiomycota	c__Agaricomycetes	o__Agaricales	f__Bolbitiaceae	g__Conocybe	s__Conocybe_sp	10	313148 Conocybe_bispora	7.4745e-117	0.91	98.3871	0	0	0	0	0	0	0	0	0	0	0	0	0	0	0	0	0	0	0	0	0	0	0	0	0	0	0	0	0	0	0
>a7776	Otu02052	Saprotroph	TTAAGTTCAGCGGGTAATCCTACCTGATTTGAGGTCAAATGTATTCATATTGTCTTGCGACAGTTAGATAGCAGATTCCCTATACACCAACTTCAGTATTGATAATTATCACACCGAGAGTCAGATTGCAGAGGCATTCCAGCTAATATATTTCAAGGGAGTGAGTTTATAAAAAGCTCACAAAGCCCTCACATCCAATCTTCTGCCAACATAAATGCTGTAGGAGATTGAGAATTTGATGACACTCAAACAGGCATGCTCCTCGGAATACCAAGGAGCGCAAGGTGCGTTCAAAGATTCGATGATTCACTGAATTCTGCAATTCACATTACTTATCGCATTTCGCTGCGTTCTTCATCGTTGACGAGTCTAG	JF907834	SH007977.07FU	373	Fungi	p__Basidiomycota	c__Agaricomycetes	o__Agaricales	f__Bolbitiaceae	g__Conocybe	s__Conocybe_sp	9	315272 Conocybe_dumetorum	3.20987e-106	0.87	97.8552	0	0	0	0	0	0	0	0	0	0	0	0	0	0	0	0	0	0	0	0	0	0	0	0	0	0	0	0	0	0	0
>b95717	Otu02824	Saprotroph	TTAAGTTCAGCGGGTAGTCCTACCTGATTTGAGGTCAAGATGGACAATAATTGTCTTGCGACGATTTATGAAGCAGATACCCTCATACAACAACTACAGCATAGATAATTATCACACTGATAGTCAGACATGCAGAGGCATTCCAGCTAATGCATTTAAGGGGAGTGAGGGATTGGATTCCACACAAAAGACCCCCACTTCCAATCTAGACAACACAAAGTTGTAGAGATTGAGAATTTAATGACACTCAAACAGGCATGCTCCTCGGAATACCAAGGAGCGCAAGGTGCGTTCAAAGATTCGATGATTCACTGAATTCTGCAATTCACATTACTTATCGCATTTCGCTGCGTTCTTCATCGATGACGAGTCTAG	JX968236	SH220680.07FU	375	Fungi	p__Basidiomycota	c__Agaricomycetes	o__Agaricales	f__Bolbitiaceae	g__Conocybe	s__Conocybe_sp	3	309693 Conocybe_aff_ochrostriata_NL_0830	9.33115e-145	0.97	98.4	0	0	0	0	0	0	0	0	0	0	0	0	0	0	0	0	0	0	0	0	0	0	0	0	0	0	0	0	0	0	0
>a100439	Otu03448	Saprotroph	TTAAGTTCAGCGGGTAGTCCTACCTGATTTGAGGTCAAATTGATTCATTTTGTCATGATGACAGTTTGAAAGCAGATCCCCTTTTACAACAACTCCAGCATAGATAATTATCATACTGATAGTTGGTTTTGCAAAGGCATTCCAGCTAATAGTTTTTAGGGGAGTAGATTCAGTTAGGTGAACCCACAACAACCCCCACTTCCAATCTCACTAGCCTTAACAAAGCTGTAGAAGATTGAGAATTTAATGACACTCAAACAGGCATGCTCCTCGGAATACCAAGGAGCGCAAGGTGCGTTCAAAGATTCGATGATTCACTGAATTCTGCAAGTCACATTACTTATCGCATTTCGCTGCGTTCTTCATCGGTGACGAGTCA	JX968199	SH033803.07FU	379	Fungi	p__Basidiomycota	c__Agaricomycetes	o__Agaricales	f__Bolbitiaceae	g__Conocybe	s__Conocybe_sp	3	327481 Conocybe_brachypodii	1.77635e-127	0.92	98.9446	0	0	0	0	0	0	0	0	0	0	0	0	0	0	0	0	0	0	0	0	0	0	0	0	0	0	0	0	0	0	0
>a80082	Otu03065	Saprotroph	TTAAGTTCAGCGGGTAGTCCTACCTGATTTGAGGTCAAAGTTATTCATATTGTCTTGCGACAGTTAAAAGAAGCGGATTCCCTCATGCAACAACCCACAGTATTGATAATTATCACACTGATAGTTGATCTGCAAAGGCATTCCAGCTAATATATTTCAGGGGAGTAGAACTTATAAAAATCCTACAAGATCCCCCCACATCCAATCATCCAAGTAAGTAAATACTAGAGATTGAGAATTTAATGACACTCAAACAGGCATGCTCCTCGGAATACCAAGGGGCGCAAGGTGCGTTCAAAGATTCGATGATTCACTGAATTCTGCAATTCACATTACTTATCGCATTTCGCTGCGTTCTTCATCGTTGACGAGTCTAG	JX968203	SH003383.07FU	377	Fungi	p__Basidiomycota	c__Agaricomycetes	o__Agaricales	f__Bolbitiaceae	g__Conocybe	s__Conocybe_sp	2	313148 Conocybe_bispora	9.2476e-110	0.88	98.4085	0	0	0	0	0	0	0	0	0	0	0	0	0	0	0	0	0	0	0	0	0	0	0	0	0	0	0	0	0	0	0
>b75326	Otu03079	Saprotroph	TTAAGTTCAGCGGGTAGTCCTACCTGATTTGAGGTCAAATATATTCAATTGTCTTGCGACAGTTAGATAGCAGATTCCCTTTGAGCATTAACTCCAGTACTGATAATTATCACACTGATAGTCAGATTGCACAGGCATTCTAGCTAATAAATTTTAGGGGAGTGAGTTTAATCAAAAGCTCACAAAACCCCCACATCCAATCATCTACCAACATAAAGCTGTAGAGATTGAGAATTTAATGACACTCAAACAGGCATGCTCCTCGGAATACCAAGGAGCGCAAGGTGCGTTCAAAGATTCGATGACTCACTGAATTCTGCAATTCACATTACTTATCGCATTTCGCTGCGTTCTTCATCGATGACGAGTCTAG	JF907834	SH007977.07FU	373	Fungi	p__Basidiomycota	c__Agaricomycetes	o__Agaricales	f__Bolbitiaceae	g__Conocybe	s__Conocybe_sp	2	315272 Conocybe_dumetorum	2.62302e-113	0.89	97.8552	0	0	0	0	0	0	0	0	0	0	0	0	0	0	0	0	0	0	0	0	0	0	0	0	0	0	0	0	0	0	0
>b95857	Otu03457	Saprotroph	TTAAGTTCAGCGGGTAGTCCTACCTGATTTGAGGTCAAATTGATTCATAGTGTCTGAAAGACAGTTTGAAAGCAGATCCCCTTTTACAACAACATCAGAATAGATAATTATCATACTGATAGTTGGTTTTGCAAAGGCATTCCAGCTAATGATTTTAAGGGGAGCAGATTTATTAAATAAACCCACAAAAACCCCCACCTCCAATCCACTAAACAACACAAGATTGTAGTGATTGAGAATTAAATGACACTCAAACAGGCATGCTCCTCGGAATACCAAGGAGCGCAAGGTGCGTTCAAAGATTCGATGATTCACTGAATTCTGCAATTCACATTACTTATCGCATTTCGCTGCGTTCTTCATCGTTGACGAGTCTAG	JX968196	SH001654.07FU	378	Fungi	p__Basidiomycota	c__Agaricomycetes	o__Agaricales	f__Bolbitiaceae	g__Conocybe	s__Conocybe_sp	2	312381 Conocybe_echinata	5.37878e-139	0.95	98.4127	0	0	0	0	0	0	0	0	0	0	0	0	0	0	0	0	0	0	0	0	0	0	0	0	0	0	0	0	0	0	0
>a13116	Otu04112	Saprotroph	TTAAGTTCAGCGGGTAGTCCTACCTGATTTGAGGTCAAAATGTTTCAAATTGTCTTAGAAAGACGGTTGAGAAGCAGATCCCCTATTGCATCAACTCCAGCATAGATAATTATCATACTGATAGTTGGTTTGCAAAGGCATTCCAGCTAATACATTTCAGGGGAGTGGAACTTGTAAAAGACCCACATAAACCCCCACATCCAATCTACAAACATTACAAACATTACAAGAATGTTGAGATTGAGAATTTAATGACACTCAAACAGGCATGCTCCTCGGAATACCAAGGAGCGCAAGGTGCGTTCAAAGATTCGATGATTCACTGAATTCTGCAATTCACATTACTTATCGCATTTCGCTGCGTTCTTCATCGATGACGAGTCTAG	JX968172	SH221744.07FU	386	Fungi	p__Basidiomycota	c__Agaricomycetes	o__Agaricales	f__Bolbitiaceae	g__Conocybe	s__Conocybe_sp	2	310214 Conocybe_watlingi	2.50778e-136	0.95	98.4456	0	0	0	0	0	0	0	0	0	0	0	0	0	0	0	0	0	0	0	0	0	0	0	0	0	0	0	0	0	0	0
>c94198	Otu04205	Saprotroph	TTAAGTTCAGCGGGTAGTCCTACCTGATTTGAGGTCAAATTGTCAAAAGTTGTCCTTGCGGACGGTTAGAAGCAAGTCTAAACCCATTCCACGGCGTAGATAATTATCACACCAATAGACGGAGCTTAGTGAACTCGCTAATGCATTTCAGGGGAGCAGACCGCCAAAAGGCAGCCTGCACAAACCCCCACATCCAAGCCTTACACAGTCTCATAACAAAACTGGTGAGGTTGAGAATTTAATGACACTCAAACAGGCATGCTCCTCGGAATACCAAGGAGCGCAAGGTGCGTTCAAAGATTCGATGATTCACTGAATTCTGCAATTCACATTACTTATCGCATTTCGCTGCGTTCTTCATCGATGACGAGTCTAG	GU227704	SH175223.07FU	376	Fungi	p__Basidiomycota	c__Agaricomycetes	o__Agaricales	f__Psathyrellaceae	g__Coprinellus	s__Coprinellus_bisporus	2	290033 Coprinellus_bisporus	3.56935e-153	0.99	98.4043	0	0	0	0	0	0	0	0	0	0	0	0	0	0	0	0	0	0	0	0	0	0	0	0	0	0	0	0	0	0	0
>b8936	Otu02297	Saprotroph	TTAAGTTCAGCGGGTAGTCCTACCTGATTTGAGGTCAAATTGTCAAGTAATGTTGTCCTCGCGGACGGTTAGAAGCGAGTCCGAACCAAGTCAACGACGTAGATAATTATCACACCGATAGACGGAGGTTCAGATATGAATCTCGCTAATACATTTCAGGGGAGCAGACCGCGCTGAGGCAGCCTGCACAAACCCCCACATCCAAGCCTCGGAGAACCGTTCAGAAAACGGGTGAGGTTGAGAATTTAATGACACTCAAACAGGCATGCTCCTCGGAATACCAAGGAGCGCAAGGTGCGTTCAAAGATTCGATGATTCACTGAATTCTGCAATTCACATTACTTATCGCATTTCGCTGCGTTCTTCATCGGTGACGAGTCTAG	JN159560	SH220359.07FU	383	Fungi	p__Basidiomycota	c__Agaricomycetes	o__Agaricales	f__Psathyrellaceae	g__Coprinellus	s__Coprinellus_disseminatus	3	309549 Coprinellus_disseminatus	2.22404e-155	0.99	98.4334	0	0	0	0	0	0	0	0	0	0	0	0	0	0	0	0	0	0	0	0	0	0	0	0	0	0	0	0	0	0	0
>b32779	Otu01601	Saprotroph	TTAAGTTCAGCGGGTAGTCCTACCTGATTTGAGGTCAAATTGTCAAAAGTTGTCTTTGCAGACGGTTAGAAGCAAGTCTAAACCCATTCCACGGCGTAGATAATTATCACACCAATAGACGGAGCTTAGTGAACTCGCTAATGCATTTCAGGGGAGCAGACCGCACAGAGGCAGCCTGCAAAAACCCCCACATCCAAGCCTTACACAGTCTCGTTACAAAACTGGTGAGGTTGAGAATTTAATGACACTCAAACAGGCATGCTCCTCGGAATACCAAGGAGCGCAAGGTGCGTTCAAAGATTCGATGATTCACTGAATTCTGCAATTCACATTACTTATCGCATTTCGCTGCGTTCTTCATCGATGACGAGTCTAG	JN159527	SH175219.07FU	376	Fungi	p__Basidiomycota	c__Agaricomycetes	o__Agaricales	f__Psathyrellaceae	g__Coprinellus	s__Coprinellus_hiascens	72	290029 Coprinellus_hiascens	2.74505e-152	0.99	98.4043	0	0	0	0	0	0	0	0	0	0	0	0	0	0	0	0	0	0	0	0	0	0	0	0	0	0	0	0	0	0	0
>c92175	Otu02208	Saprotroph	TTAAGTTCAGCGGGTAGTCCTACCTGATTTGAGGTCAAATTGTCAAAGGTATTGTCCTTGCGGACGGTTAGAAGCGAGTCTAAACCCAGTCCACGGCGTAGATAATTATCACACCAATAGACGGAGGTTCAGTATGAACTCGCTAATGCATTTCAGGGGAGCAGACCAGCGCTGAGGCAGCCTGCACAAACCCCCACATCCAAGCCTCGGGTACCGTTCAGAAAACGGGTGAGGTTGAGAATTTAATGACACTCAAACAGGCATGCTCCTCGGAATACCAAGGAGCGCAAGGTGCGTTCAAAGATTCGATGATTCACTGAATTCTGCAATTCACATTACTTATCGCATTTCGCTGCGTTCTTCATCGTTGACGAGTCTAG	JN943116	SH220349.07FU	380	Fungi	p__Basidiomycota	c__Agaricomycetes	o__Agaricales	f__Psathyrellaceae	g__Coprinellus	s__Coprinellus_micaceus	2	309540 Coprinellus_micaceus	4.69956e-154	0.99	98.4211	0	0	0	0	0	0	0	0	0	0	0	0	0	0	0	0	0	0	0	0	0	0	0	0	0	0	0	0	0	0	0
>a14976	Otu01384	Saprotroph	TTAAGTTCAGCGGGTAGTCCTACCTGATTTGAGGTCAAATTGTCAAAAGTTGTCTTTGCAGACGGTTAGAAGCAAGTCTAAACCCATTCCACGGCGTAGATAATTATCACACCAATAGACGGAGCTTAGTGAACTCGCTAATACATTTCAGGGGAGCAGACCGCCGAAAGGCAGCCTGCACAAACCCCCACCATCCAAGCCTTACACAGTCTCATGACAAAACTGGTGAGGTTGAGAATTTAATGACACTCAAACAGGCATGCTCCTCGGAATACCAAGGAGCGCAAGGTGCGTTCAAAGATTCGATGATTCACTGAATTCTGCAATTCACATTACTTATCGCATTTCGCTGCGTTCTTCATCGATGACGAGTCTAG	GU227704	SH175223.07FU	377	Fungi	p__Basidiomycota	c__Agaricomycetes	o__Agaricales	f__Psathyrellaceae	g__Coprinellus	s__Coprinellus_sp	242	290033 Coprinellus_bisporus	2.05446e-147	0.98	98.4085	0	0	0	0	0	0	0	0	0	0	0	0	0	0	0	0	0	0	0	0	0	0	0	0	0	0	0	0	0	0	0
>a81441	Otu01801	Saprotroph	TTAAGTTCAGCGGGTAGTCCTACCTGATTTGAGGTCAAATTGTCAAAAGTTGTCCTTGCGGACGGTTAGAAGCAAGTCTAAGAACCATCCACGGCGTAGATAATTATCACACCAATAGACGGAGCTCAGTTTGAACTCGCTAATGCATTTCAGGGGAGCAGACCGCGCTGAGGCAGCCTACACAAACCCCCACATCCAAGCCTTACACAGTCTCATAACAAAACTGGTAAGGTTGATAATTTAATGACACTCAAACAGGCATGCTCGTCGGAATACCAACGAGCGCAAGGTGCGTTCAAAGATTCGATGATTCACTGAATTCTGCAATTCACATTACTTATCGCATTTCGCTGCGTTCTTCATCGGTGACGAGTCTAG	HQ846992	SH194008.07FU	378	Fungi	p__Basidiomycota	c__Agaricomycetes	o__Agaricales	f__Psathyrellaceae	g__Coprinellus	s__Coprinellus_sp	35	298428 Coprinellus_eurysporus	1.58496e-146	0.97	98.1481	0	0	0	0	0	0	0	0	0	0	0	0	0	0	0	0	0	0	0	0	0	0	0	0	0	0	0	0	0	0	0
>a33626	Otu02449	Saprotroph	TTAAGTTCAGCGGGTAGTCCTACCTGATTTGAGGTCAAATTGTCAAGGGTATTGTCCCGAGGGACGGTTAGAAGCGAGTCTGAACCCTGTCCACGGCGTAGATAATTATCACACCAATAGACGGAAGCTCAGTATGAACCTCGCTAATGCATTTCAGGGGAGCAGACCGCGCTGAGGCAGCCTGCACAAACCCCCACATCCAAGCCTCGACGCAGTTCAGAAAACTGGTGAGGTTGAGAATTTAATGACACTCAAACAGGCATGCTCCTCGGAATACCAAGGAGCGCAAGGTGCGTTCAAAGATTCGATGATTCACTGAATTCTGCAATTCACATTACTTATCGCATTTCGCTGCGTTCTTCATCGGTGACGAGTCTAG	GU055721	SH220377.07FU	379	Fungi	p__Basidiomycota	c__Agaricomycetes	o__Agaricales	f__Psathyrellaceae	g__Coprinellus	s__Coprinellus_sp	4	309565 Coprinellus_sp	9.99189e-153	0.99	98.4169	0	0	0	0	0	0	0	0	0	0	0	0	0	0	0	0	0	0	0	0	0	0	0	0	0	0	0	0	0	0	0
>c115367	Otu02674	Saprotroph	TTAAGTTCAGCGGGTAGTCTTACCTGATTTGAGGTCAAAAATGTCAAGAGTTGTCCAAGGGAAGGACGGTTTGAAGCAGGTCTTATGATAAGCCAACCCAATCCACGGAGTAGATAATTATCACACCGATAGATAAGGGGCCTAACCCACTAATACATTTCAGAGGAGCAGACCACAGTTGTGGACCTGCAAACCCCCCACCTCCAAGCCTACACACAAACTTCATGACAAAGTTGGTGAGGTTGAGAATTTAATGACACTCAAACAGGCATGCTCCTCGGAATACCAAGGAGCGCAAGGTGCGTTCAAAGATTCGATGATTCACTGAATTCTGCAATTCACATTACTTATCGCATTTCGCTGCGTTCTTCATCGATGACGAGTCTAG	UDB015511	SH219002.07FU	388	Fungi	p__Basidiomycota	c__Agaricomycetes	o__Agaricales	f__Psathyrellaceae	g__Coprinopsis	s__Coprinopsis_acuminata	2	308925 Coprinopsis_acuminata	1.05885e-156	0.99	98.4536	0	0	0	0	0	0	0	0	0	0	0	0	0	0	0	0	0	0	0	0	0	0	0	0	0	0	0	0	0	0	0
>a76356	Otu01523	Saprotroph	TTAAGTTCAGCGGGTAGTCTTACCTGATTTGAGGTCAAAATGATCAAAGTTGTCCGAGACGGACGGTTATGAGCAGGTTCATTGATGGCCAATCCATCACCCACGGCGTAGATAATTATCACACCAATAGATGAGGGGCACAAACCCACTAATGCATTTCAGAGGAGCAGACCACAAAAGAGCGGACCTGCAAGCCCCCATATCCAAGCCTAACAAAACCCATTGAAAAACAGGTGTTAGGTTGAGAATTTAATGACACTCAAACAGGCATGCTCCTCGGAATACCAAGGAGCGCAAGGTGCGTTCAAAGATTCGATGATTCACTGAATTCTGCAATTCACATTACTTATCGCATTTCGCTGCGTTCTTCATCGATGACGAGTCTAG	JQ922137	SH219032.07FU	387	Fungi	p__Basidiomycota	c__Agaricomycetes	o__Agaricales	f__Psathyrellaceae	g__Coprinopsis	s__Coprinopsis_sp	113	308955 Coprinopsis_sp_CCG_2012	5.20447e-131	0.94	98.4496	0	0	0	0	0	0	0	0	0	0	0	0	0	0	0	0	0	0	0	0	0	0	0	0	0	0	0	0	0	0	0
>c409	Otu01986	Saprotroph	TTAAGTTCAGCGGGTAGTCTTACCTGATTTGAGGTCAAAAATGTCAAGTATTGTCCGGTAAAGGACGGTTAGAAGCAGGTTCATAATAGTCTTCCAGTCCACGGCGTAGATAATTATCACACCAATAGATAGGGGACCAAACCCACTAATACATTTCAGAGGAGCAGACCACAGAGTGGACCTGCAACCCCCACATCCAAGCCTACACACATTCTCATTACAAAAATGGTGAGGTTGAGAATTTAATGACACTCAAACAGGCATGCTCCTCGGAATACCAAGGAGCGCAAGGTGCGTTCAAAGATTCGATGATTCACTGAATTCTGCAATTCACATTACTTATCGCATTTCGCTGCGTTCTTCATCGTTGACGAGTCTAG	GQ249278	SH219019.07FU	380	Fungi	p__Basidiomycota	c__Agaricomycetes	o__Agaricales	f__Psathyrellaceae	g__Coprinopsis	s__Coprinopsis_sp	10	308942 Coprinopsis_semitalis	4.29069e-142	0.99	92.1053	0	0	0	0	0	0	0	0	0	0	0	0	0	0	0	0	0	0	0	0	0	0	0	0	0	0	0	0	0	0	0
>b107683	Otu02554	Saprotroph	TTAAGTTCAGCGGGTAGTCTTACCTGATTTGAGGTCAAAATTGTCAAGAGTTGTCCGGTGAAGGACGGTTAGAAGCGGGTCTAAGTCAGCCACCCAAATCCACGGCGTAGATAATTATCACACCAATAGATTAGGGGCCCAACCCACTAATACATTTCAGAGGAGCAGACCACGTTAGCGGACCTGAACCCCCACATCCAAGCCTGCACTCAGCAAAAGCTGGTGAGGTTGAGAAATTAATGACACTCAAACAGGCATGCTCCTCGGAATACCAAGGAGCGCAAGGTGCGTTCAAAGATTCGATGATTCACTGAATTCTGCAATTCACATTACTTATCGCATTTCGCTGCGTTCTTCATCGTTGACGAGTCTAG	AB071613	SH218996.07FU	374	Fungi	p__Basidiomycota	c__Agaricomycetes	o__Agaricales	f__Psathyrellaceae	g__Coprinopsis	s__Coprinopsis_sp	3	308919 Coprinopsis_phlyctidospora	3.45751e-149	0.98	98.3957	0	0	0	0	0	0	0	0	0	0	0	0	0	0	0	0	0	0	0	0	0	0	0	0	0	0	0	0	0	0	0
>b70345	Otu02786	Saprotroph	TTAAGTTCAGCGGGTAATCCTACCTGATTTGAGGTCAAAATTGTCAACAATCATTTGTCACAAAGGGACAGTTAGAAGCAGCTGTAAGCAAACCAAATCCAATGGCATAGATAATTATCACACCAATAGACCAGTAGCCCATGTTCAACCACTAATAAATTTTAGGGGAGCAGACCTCAACCCATTGAAGGGAAGACCTGCAGATAAAAAACCCCCCACCTCCAAGCCTACACCCCAACCTGTTTTAAAAACAAAATAAGAGGTGAGGTTGAGAAATTAATGACACTCAAACAGGCATGCTCCTCGGAATACCAAGGAGCGCAAGGTGCGTTCAAAGATTCGATGATTCACTGAATTCTGCAATTCACATTACTTATCGCATTTCGCTGCGTTCTTCAT…	HQ847016	SH219024.07FU	414	Fungi	p__Basidiomycota	c__Agaricomycetes	o__Agaricales	f__Psathyrellaceae	g__Coprinopsis	s__Coprinopsis_sp	2	308947 Coprinopsis_pseudofriesii	2.31437e-81	0.81	98.3092	0	0	0	0	0	0	0	0	0	0	0	0	0	0	0	0	0	0	0	0	0	0	0	0	0	0	0	0	0	0	0
>c82737	Otu04109	Saprotroph	TTAAGTTCAGCGGGTAGTCTTACCTGATTTGAGGTCAAAATGATCAAAGTTGTCCGAGACGGACGGTTATGAGCAGGTTCATTGATGGCCAATCCATCACCCACGGCGTAGATAATTATCACACCAATAGATGAGGGGCACAAACCCACTAATGCATTTCAGAGGAGCAGACCACAAAAGAGCGGAACTGCAAGCCCCCATATCCAAGCCTAACAAAACCCATTGCACAACAGGTGTTAGGTTGAGAATTTAATGACACTCAAACAGGCATGCTCCTCGGAATACCAAGGAGCGCAAGGTGCGTTCAAAGATTCGATGATTCACTGAATTCTGCAATTCACATTACTTATCGCATTTCGCTGCGTTCTTCATCGATGACGAGTCTAG	JQ922137	SH219032.07FU	387	Fungi	p__Basidiomycota	c__Agaricomycetes	o__Agaricales	f__Psathyrellaceae	g__Coprinopsis	s__Coprinopsis_sp	2	308955 Coprinopsis_sp_CCG_2012	2.36733e-128	0.93	98.4496	0	0	0	0	0	0	0	0	0	0	0	0	0	0	0	0	0	0	0	0	0	0	0	0	0	0	0	0	0	0	0
>a53988	Otu01462	Saprotroph	TTAAGTTCAGCGGGTAGTCCTACCTGATTTGAGGTCAGATTTGAAAAGTGTCCTAAGACAGTTTATGAGCTCGACCAGAACTCAGAGATGGGCTTACCATGGCGTAGATAATTATCACACCGTGAACCACTCTGTGATCAGAAAAGTCCAGCTAATGCATTCAAGAGGAGCCGACCAACAAAGGCCAGCAACCCCCAAGTCCAAGCCTCATCATGCTCAAAAAGCTTGAGAGGTTGAGAATTTCATGACACTCAAACAGGCATGCTCTTCGGAATACCAAAGAGCGCAAGGTGCGTTCAAAGATTCGATGATTCACTGAATTCTGCAATTCACATTACTTATCGCATTTCGCTGCGTTCTTCATCGATGACGAGTCTAG	JN649335	SH202654.07FU	379	Fungi	p__Basidiomycota	c__Agaricomycetes	o__Incertae_sedis	f__Incertae_sedis	g__Cotylidia	s__Cotylidia_sp	104	302154 Cotylidia_undulata	3.19125e-137	0.95	98.4169	0	0	0	0	0	0	0	0	0	0	0	0	0	0	0	0	0	0	0	0	0	0	0	0	0	0	0	0	0	0	0
>a53119	Otu01506	Saprotroph	TTAAGTTCAGCGGGTAGTCCTACCTGATTTGAGGTCAGATTTGAAAAGTGTCCTAAGACGGTTTATGAGCTTGACCAGAACTCAGAGATGGGCTTACCATGGCGTAGATAATTATCACACCGTGAACCACTCTGTGATCAGAAAAGTCCAGCTAATGCATTCAAGAGGAGCCGACCGATAAAGGCCAGCAACCCCCAAGTCCAAGCCTCATCATGCTTTTAAAAAAGCTTGAGAGGTTGAGAATTTCATGACACTCAAACAGGCATGCTCTTCGGAATACCAAAGAGCGCAAGGTGCGTTCAAAGATTCGATGATTCACTGAATTCTGCAATTCACATTACTTATCGCATTTCGCTGCGTTCTTCATCGATGACGAGTCTAG	JN649335	SH202654.07FU	382	Fungi	p__Basidiomycota	c__Agaricomycetes	o__Incertae_sedis	f__Incertae_sedis	g__Cotylidia	s__Cotylidia_sp	81	302154 Cotylidia_undulata	1.90512e-135	0.94	98.4293	0	3	0	0	0	0	0	0	0	0	0	0	0	0	0	0	0	0	0	0	0	0	0	0	0	0	0	0	0	0	0
>b5027	Otu01429	Saprotroph	TTAAGTTCAGCGGGTAGTCCTACCTGATTTGAGGTCAAGATTGTCAAGTATTGTCTAGCAAGTAGACAGTTAGACAGCAGCATAGCCCCTTTATATGCGTGGCACTGACTAATGGCGTAGATAGTTATCACACCAATAGCTGTTATACCACAGAGGTACCGCTAATGCATTTCAGAGGAGCTGACTCGAGAGCCTGCATAAACCTCCATATCCAAGCCAGACCAGCAAAGCTAGTAAGGTTGAGAATTTAATGACACTCAAACAGGCATGCCCCTCGGAATACCAAGGGGCGCAAGGTGCGTTCAAAGATTCGATGATTCACTGAATTCTGCAATTCACATTACTTATCGCATTTCGCTGCGTTCTTCATCGTTGACGAGTCTAG	AY969374	SH464966.07FU	385	Fungi	p__Basidiomycota	c__Agaricomycetes	o__Agaricales	f__Inocybaceae	g__Crepidotus	s__Crepidotus_sp	57	328776 Crepidotus_sp	9.87446e-149	0.98	95.5844	0	0	0	0	0	0	0	0	0	0	0	0	0	0	0	0	0	0	0	0	0	0	0	0	0	0	0	0	0	0	0
>c5635	Otu01302	Saprotroph	TTAAGTTCAGCGGGTAGTCCTACCCGATTTGAGGTCAAAAGGTTTTGGAAAACAGGTGCATATATGCGCCCGAATCCGATTGTCCGAGGACGATTAGAAGCAAGCCCAACGAGAACCGCCAAGTTTGACGCAGATAATTATCACGCCAAGAGACGGTCAGCACAGGGAAGTCTCGCTAATAGATTTAAAGGGAGCAGACCGGGGATGGCCTGCAAAACCCTCAAGACCAAGCCTCAGAAACACAAAGGTTTTGAGGTTGATGATTTAATGACACTCAAACGGGCATGCCTTGTGGAATACCACAAGGCGCAAGGTGCGTTCAAAGATTCGATGATTCACTGAAATCTGCAATTCACATTACTTATCGCATTTCGCTGCGTTCTTCATCGATGACGAGTC…	GU328515	SH001975.07FU	402	Fungi	p__Basidiomycota	c__Agaricomycetes	o__Russulales	f__Stephanosporaceae	g__Cristinia	s__Cristinia_sp	647	312492 Cristinia_sp	2.02272e-135	0.91	98.5075	0	0	0	0	0	0	0	0	0	0	0	0	0	0	0	0	0	0	0	0	0	0	0	0	0	0	0	0	0	0	0
>a48425	Otu02285	Saprotroph	TTAAGTTCAGCGGGTAGTCCTACCTGATTTGAGGTCAAATGTCAAAGTAAATTGTCCAAGTGAATGGACGATTAGAAGCAAAACCCCGGTTCAAAATTGAACCCAAGTGCTTTCGCGCTTCCTAGGCGTAGATAATTATCACACCCAATAGAAGCGGTCCAACAAAGGTTTCCGCTAATGCATTTCAGGAGAGCCGACTTCAACTGAATGAAAGCCCGCAACCCCCACATCCAACACACACTTCACTTGATAAACAAATGAAATGGGTTGAGAATTTAATGACACTCAAACAGGCATGCTCTTCGGAATACCAAAGAGCGCAAGGTGCGTTCAAAGATTCGATGATTCACTGAATTCTGCAATTCACATTACTTATCGCAATTCGCTGCGTTCTTCATC…	DQ463345	SH202151.07FU	413	Fungi	p__Basidiomycota	c__Agaricomycetes	o__Agaricales	f__Agaricaceae	g__Cyathus	s__Cyathus_olla	6	301931 Cyathus_olla	3.25615e-160	0.99	93.4625	0	0	0	0	0	0	0	0	0	0	0	0	0	0	0	0	0	0	0	0	0	0	0	0	0	0	0	0	0	0	0
>b31581	Otu00027	Saprotroph	TTAAGTTCAGCGGGTAGTCCTACCTGATTTGAGGTCAAATTTGTTTATAAAATTGTCCGAAGACCATTGTATGCGGCACCTCGATCCTAGCCAACAGCGCAACATTTATCACACTGATGACCGAAACGGACCAAAGTCGATTCCGCGAATGCATTTGAGAGGAGCCGACCCATGAGAGGGGGCCAGCACACTCCACTATCCAAGCCTCCGAATGCGAAAATAAATCCGATCGGGGTTGAGAATTTAATGACACTCAAACAGGCATGCTCCCCGGAATACCAGGGAGCGCAAGGTGCGTTCAAAGATTCGATGATTCACTGAAAATCTGCAATTCACATTACTTATCGCATTTCGCTGCGTTCTTCATCGGTGACGAGTCTAG	EU292269	SH180227.07FU	382	Fungi	p__Basidiomycota	c__Agaricomycetes	o__Atheliales	f__Atheliaceae	g__Fibulorhizoctonia	s__Fibulorhizoctonia_sp	26	292277 Fibulorhizoctonia_sp	5.78672e-147	0.96	99.7382	0	0	0	0	0	0	0	0	0	0	0	0	0	0	0	0	0	0	0	0	0	0	0	0	0	0	0	0	0	0	0
>c112380	Otu03467	Saprotroph	TTAAGTTCAGCGGGTAGTCCTACCCGATTTGAGGTCAAAATGGATCAGAAAAGACGCGCATATATGCGGTCTAAACCGGTCGTGTCTCAGTAAAGAGACGATTAGAAGCAAGCCCAACGAGGCCGCACTTTGACACAGATAATTATCACTAATGTATTTAAAGGGAGCCGACTTGTGAAAGCCCGCAAACCCTCAAAACCAAGCCTCGGGCTACAAAAATGCAGTCGAGTTTGATGATTAAATGACACTCAAACGGGCATACCTTACGGAATACCATAAGGTGCAAGGTGCGTTCAAAGATTCGATGATTCACTGAAATCTGCAATTCACATTACTTATCGAATTTCGCTGCGTTCTTCATCGTTGACGAGTCTAG	AB520316	SH472533.07FU	376	Fungi	p__unidentified	c__Agaricomycetes	o__Russulales	f__Stephanosporaceae	g__unidentified	s__Fungi_sp	2	329817 Stephanosporaceae_sp	1.33925e-91	0.84	98.4043	0	0	0	0	0	0	0	0	0	0	0	0	0	0	0	0	0	0	0	0	0	0	0	0	0	0	0	0	0	0	0
>a33612	Otu03025	Saprotroph	TTAAGTTCAGCGGGTAGTCCTACCTGATTTGAGGTCAAATAGTCAATAAGTGTCCTAAGTGGACAATTAGAAGCAGCACATCCCTATTTAAAGCAGACATCTAACGGCATAGATAATTATCACACCAGTAGATAGTCCACACGGGGGGGCACCAGCTAATACATTTTAGGGGAGCTGATTTCTTTCGAAGCCAGCAAAAAAAAGACCCCCACATCCAAGCCATTACATTGCTCATAAAAGCTAGTAAGGTTGAGAATTTAATGACACTCAAACAGGCATGCCCCTCGGAATACCAAGGGGCGCAAGGTGCGTTCAAAGATTCGATGATTCACTGAATTCTGCAATTCACATTACTTATCGCATTTCGCTACGTTCTTCATCGATGACGAGTCTAG	AY925213	SH178797.07FU	395	Fungi	p__Basidiomycota	c__Agaricomycetes	o__Agaricales	f__Strophariaceae	g__Gymnopilus	s__Gymnopilus_sp	4	291631 Gymnopilus_penetrans	3.89914e-157	0.98	98.2278	0	0	0	0	0	0	0	0	0	0	0	0	0	0	0	0	0	0	0	0	0	0	0	0	0	0	0	0	0	0	0
>b138612	Otu02448	Saprotroph	TTAAGTTCAGCGGGTAGTCCCGCCTGATTTGAGGTCAAGTTTCGATAAAGTTTGTCTTTTGACGGTTGGAAGCAGGTCCCCCACAATCGTGGCGTACCACCACGGCGTAGACAATTATCACACCGGGGGCGGCACCACAAGGGTCTCGCTAATGCATTTGAGAGGAGCCGATCCGCGAGGACCAGCAAAGCCTCCAAGTCCAAGCCCACGCGCTTTCACAAGAAAAGCACAGGGTTGAGAATTTCACGACACTCAAACAGGCGTGCCCTTCGGAATACCAAAGGGCGCAAGGTGCGTTCAAAGATTCGATGATTCACTGAATTCTGCAATTCACATTACTTATCGCATTTCGCTGCGTTCTTCATCGGTGACGAGTCTAG	KC492899	SH201107.07FU	380	Fungi	p__Basidiomycota	c__Agaricomycetes	o__Russulales	f__Bondarzewiaceae	g__Heterobasidion	s__Heterobasidion_annosum	2	301524 Heterobasidion_annosum	3.61425e-153	0.99	98.4211	0	0	0	0	0	0	0	0	0	0	0	0	0	0	0	0	0	0	0	0	0	0	0	0	0	0	0	0	0	0	0
>c66804	Otu02251	Saprotroph	TTAAGTTCAGCGGGTAGTCCTACCTGATTTGAGGTCAAATGCAATAATATTGTTCCACTATGGAAACGATTTTAAGCATGAATACATAGATCTCATCAAAAGTTCGGCAGCGTAGATAATTATTACACTGGAGAACACTCGATAAATATTCACGCTAATGCATTTGAGAAGAGCTGAAAAGGTATTTCCAGCAGCTTCCAATATCCAGTACCAACCGTCAGAAAAATCTGAGGGAACTGATGAAAACATGACACTCAAACAGGCATGCTCCTCGGAATACCAAGGAGCGCAAGGTGCGTTCAAAGATTCGATGATTCACTGAATTCTGCAATTCACATTACTTATCGCATTTCGCTGCGTTCTTCATCGTTGACGAGTCTAG	JN572910	SH201384.07FU	382	Fungi	p__Basidiomycota	c__Agaricomycetes	o__Polyporales	f__Meruliaceae	g__Hyphoderma	s__Hyphoderma_sp	7	301632 Hyphoderma_obtusiforme	6.27208e-124	0.92	94.2408	0	0	0	0	0	0	0	0	0	0	0	0	0	0	0	0	0	0	0	0	0	0	0	0	0	0	0	0	0	0	0
>a56700	Otu01566	Saprotroph	TTAAGTTCAGCGGGTAGTCCTACCTGATTTGAGGTCAGATATGTCAAAGTGCATGCATTCATGCGGTTAGAAGCCCGGACATAGCCCCTCGCCGATCAGTGAATGATAGTTTATCACACTTCTCGGAGCGAGAGCGCCCGACTAATGCATTCAAGGGAAGCCGACTTTCGCCAGCAGATCCCCAATTCCAAGCCACGGGACACACAAAGGCATCGTGGTTGATGATTTCATGACACTCAAACAGGCATGCTCCTGAAACAAGTCCAGGAGCGCAAGGTGCGTTCAAAGATTCGATGATTCACTGAATTCTGCAATTCACATTACTTATCGCATTTCGCTGCGTTCTTCATCGTTGACGAGTCTAG	FJ197950	SH017057.07FU	365	Fungi	p__Basidiomycota	c__Agaricomycetes	o__Hymenochaetales	f__Schizoporaceae	g__Hyphodontia	s__Hyphodontia_sp	60	319369 Hyphodontia_sp	9.03772e-145	0.98	98.3562	0	0	0	0	0	0	0	0	0	0	0	0	0	0	0	0	0	0	0	0	0	0	0	0	0	0	0	0	0	0	0
>b57132	Otu02370	Saprotroph	TTAAGTTCAGCGGGTAGTCCCACCTGATTTGAGGTCAAATTGTCATATATTGTCCGAATGAACAGACGATTATAAGCAGTGCTAAAAACGGCAAATAGTCCACGGCGTAGATAATTATCACACCAATAGACAAGTTTACACAAGGCAACCAGCTAATGTATTTCAGGGGAGCTAATTTCAATAGAGAAACCTGCATACCCCCACATCCAAGCCATTTGCTAACCAAAAAGTTAACAAAGGTTGAGAATTTAATGACACTCAAACAGGCATGCTCCTCGGAATACCAAGGAGCGCAAGGTGCGTTCAAAGATTCGATGATTCACTGAATTCTGCAATTCACATTACTTATCGCATTTCGCTGCGTTCTTCATCGTTGACGAGTCTAG	UDB001581	SH219736.07FU	386	Fungi	p__Basidiomycota	c__Agaricomycetes	o__Agaricales	f__Strophariaceae	g__Hypholoma	s__Hypholoma_capnoides	2	309250 Hypholoma_capnoides	6.03862e-151	0.99	95.5959	0	0	0	0	0	0	0	0	0	0	0	0	0	0	0	0	0	0	0	0	0	0	0	0	0	0	0	0	0	0	0
>d32298	Otu02809	Saprotroph	TTAAGTTCAGCGGGTAGTCCTACCTGATTTGAGGTCAAATTGTCATATATTGTCTGAATGAACAGACGATTATAAGCAGTGCTATAAACGGCAAATAGCCCACGGCGTAGATAATTATCACACCAATAGACATGTTCGCACAAGGCAACCAGCTAATGCATTTCAGGGGAGTTTATTTCAATGAAGAAACCAACATGCCCCCACTTCCAATCCACTTACTAACCAAAAAGTTAATAAAGGTTGAGAATTTAATGACACTCAAACAGGCATGCTCCTCGGAATACCAAGGAGCGCAAGGTGCGTTCAAAGATTCGATGATTCACTGAATTCTGCAATTCACATTACTTATCGCATTTCGCTGCGTTCTTCATCGATGACGAGTCTAG	UDB011502	SH201439.07FU	386	Fungi	p__Basidiomycota	c__Agaricomycetes	o__Agaricales	f__Strophariaceae	g__Hypholoma	s__Hypholoma_fasciculare	2	301655 Hypholoma_fasciculare	1.36846e-157	0.99	98.4456	0	0	0	0	0	0	0	0	0	0	0	0	0	0	0	0	0	0	0	0	0	0	0	0	0	0	0	0	0	0	0
>a91669	Otu03042	Saprotroph	TTAAGTTCAGCGGGTAGTCCTACCTGATTTGAGGTCAAATTGTCATGTATTGTCTGAAAGAACAGACGATTATAAGCAGTGCTATAAACGGCAAATAGCCCACGGCGTAGATAATTATCACACCAATAGACATGTTTGCACAAGGCAACCAGCTAATGCATTTCAGGGGAGTTCATTTCAATGAAGAAACCAACATGCCCCCACTTCCAATCCACTTACTAACTAAAAAGTTAACAAGGGTTGAGAATTTAATGACACTCAAACAGGCATGCTCCTCGGAATACCAAGGAGCGCAAGGTGCGTTCAAAGATTCGATGATTCACTGAATTCTGCAATTCACATTACTTATCGCATTTCGCTGCGTTCTTCATCGGTGACGAGTCTAG	UDB011502	SH201439.07FU	386	Fungi	p__Basidiomycota	c__Agaricomycetes	o__Agaricales	f__Strophariaceae	g__Hypholoma	s__Hypholoma_sp	2	301655 Hypholoma_fasciculare	1.67463e-150	0.97	98.4456	0	0	0	0	0	0	0	0	0	0	0	0	0	0	0	0	0	0	0	0	0	0	0	0	0	0	0	0	0	0	0
>d75837	Otu03397	Saprotroph	TTAAGTTCAGCGGGTAGTCCTACCTGATTTGAGGTCAGATTGTCAAATAAATTGTCCACTAATGCAGACGGTTTGAAGCATGAAATTTATAAGATCCAAGCAAGCCACAGCGTAGATAATTATCACACTGAGAAAATGCTCGGTAAACATTCACACTAATGCATTTCAGAGGAGCTGATACTCAATAAAGAGACCAGCAATAATCCTCCACATCCAATACCAATCCAATACCTTTGACAGTATTGAATGGATTGAGAATACCATGACACTCAAACAGGCATGCTCCTCGGAATACCAAGGAGCGCAAGGTGCGTTCAAAGATTCGATGATTCACTGAATTCTGCAATTCACATTACTTATCGCATTTCGCTGCGTTCTTCATCGTTGACGAGTCTAG	AF429426	SH197341.07FU	397	Fungi	p__Basidiomycota	c__Agaricomycetes	o__Polyporales	f__Meruliaceae	g__Hypochnicium	s__Hypochnicium_sp	2	299979 Hypochnicium_geogenium	8.11527e-152	0.97	96.7254	0	0	0	0	0	0	0	0	0	0	0	0	0	0	0	0	0	0	0	0	0	0	0	0	0	0	0	0	0	0	0
>a33138	Otu02001	Saprotroph	TTAAGTTCAGCGGGTAGTCCTACCTGATTTGAGGTCAAGAAGTTCATTAATGATTGTCCACAGTGGACGATTAGCAGCTGAACTAGTCAGAGAGCAGTCATCACAGTGTAGATAATTATCACACTAGTGACGGGACTGCAAACGGTTCCGCTAATGTATTTCAGGAGAGCCGACCTAGTAAAGGCCCGCAAACTCCCAACATCCAAGCCCCAGCATAGCTCACAAAAGCTAGTGGGGTTGAGAATTTAATGACACTCAAACAGGCATGCTCCTCGGAATACCAAGGAGCGCAAGGTGCGTTCAAAGATTCGATGATTCACTGAATTCTGCAATTCACATTACTTATCGCATTTCGCTGCGTTCTTCATCGTTGACGAGTCTAG	DQ112557	SH175879.07FU	383	Fungi	p__Basidiomycota	c__Agaricomycetes	o__Agaricales	f__Agaricaceae	g__Lycoperdon	s__Lycoperdon_pyriforme	7	290272 Lycoperdon_pyriforme	2.22404e-155	0.99	98.4334	0	0	0	0	0	0	0	0	0	0	0	0	0	0	0	0	0	0	0	0	0	0	0	0	0	0	0	0	0	0	0
>d18473	Otu02443	Saprotroph	TTAAGTTCAGCGGGTAGTCCTACCTGATTTGAGGTCAAGAAGTTCATTAAGTATTGTCCATAGTGGACGATTAGCAGCTGAACTAGTCAGAGAGCAATCATCACAGTGTAGATAATTATCACACTAGTGACGGGACTGCAAACGGTTCCGCTAATGCATTTCAGGAGAGCTGACCTTTATTGATAAAGACCCGCAAACTCCCATATCCAAGCCCCATCACAACTCGCAAAAGCTGGAGGGGTTGAGAATTTAATGACACTCAAACAGGCATGCTCCTCGGAATACCAAGGAGCGCAAGGTGCGTTCAAAGATTCGATGATTCACTGAATTCTGCAATTCACATTACTTATCGCATTTCGCTGCGTTCTTCATCGATGACGAGTCTAG	DQ112607	SH175878.07FU	387	Fungi	p__Basidiomycota	c__Agaricomycetes	o__Agaricales	f__Agaricaceae	g__Lycoperdon	s__Lycoperdon_utriforme	4	290271 Lycoperdon_utriforme	4.94964e-158	0.99	98.4496	0	0	0	0	0	0	0	0	0	0	0	0	0	0	0	0	0	0	0	0	0	0	0	0	0	0	0	0	0	0	0
>b99504	Otu01966	Saprotroph	TTAAGTTCAGCGGGTAGTCCTACCTGATTTGAGGTCAAATGGTCAAAAGCTGTCTCGCAAGCAAGACGGTTAGAAGCAGGTCCTTAAGATGCATCAGCCCATAATGATGTAGATAGTTATCACACCAAAGGCAGTTCAGCAAAGGTTCTGCTAATGCATTTAAGAGGAGCCAGAGCCTCAAAAGAAGCCCAGCAAACCCTCCAAGTCCAAGCTCTGCTAGTCTTCAGAATGAAAACTGGAAGAGTTGAGAATTTAATGACACTCAAACAGGCATGCTCCTCGGAATACCAAGGAGCGCAAGGTGCGTTCAAAGATTCGATGATTCACTGAATTCTGCAATTCACATTACTTATCGCATTTCGCTGCGTTCTTCATCGATGACGAGTCTAG	UDB015274	SH010319.07FU	390	Fungi	p__Basidiomycota	c__Agaricomycetes	o__Agaricales	f__Marasmiaceae	g__Macrocystidia	s__Macrocystidia_sp	16	316300 Macrocystidia_cucumis	1.95216e-135	0.93	98.4615	0	0	0	0	0	0	0	0	0	0	0	0	0	0	0	0	0	0	0	0	0	0	0	0	0	0	0	0	0	0	0
>c121556	Otu02550	Saprotroph	TTAAGTTCAGCGGGTAGTCCTACCTGATTTGAGGTCAAATTGTCATAAATTGTCTTGTAGCAAGACAGTTAGAAGCAGATCCTCAAAATGCTTCAGCCTGTAATGATGTAGATAATTATCACACCAAAGGTTCAGCAAAGGTTCTGCTAATACATTTAAGAGGAGCCAAGCCTCAGAGAGGCCAGCAACCCTCCAAATCCAAGCCCTACCAGTTCTCCAAGAAAGAAAACTAGAGAGTTGAGGATTTAATGACACTCAAACAGGCATGCTCCTCGGAATACCAAGGAGCGCAAGGTGCGTTCAAAGATTCGATGATTCACTGAATTCTGCAATTCACATTACTTATCGCATTTCGCTGCGTTCTTCATCGATGACGAGTCTAG	HQ604758	SH190041.07FU	383	Fungi	p__Basidiomycota	c__Agaricomycetes	o__Agaricales	f__Marasmiaceae	g__Macrocystidia	s__Macrocystidia_sp	4	296626 Macrocystidia_cucumis	9.81407e-149	0.97	98.4334	0	0	0	0	0	0	0	0	0	0	0	0	0	0	0	0	0	0	0	0	0	0	0	0	0	0	0	0	0	0	0
>a59044	Otu02552	Saprotroph	TTAAGTTCAGCGGGTAATCCTACCTGATTTGAGGTCAAATGGTCAAGTATTGTCCTTGCGGACGGTTAGAAGCTGGAAGGCTTATATACACGCTAACGACCCAAAAGGCGTAGATAATTATCACACCAATAAGGCTGAAGGCGCAAACCCAGCTAATGTATTTCAGAGGAGCCGACTTTAAAAAGCCCGCAACCTCCACATCCAAGCCTTAGAAAACAAAAGCCTTCTAAGGTTGAGAATTTAATGACACTCAAACAGGCATGCCCTTCGGAATACCAAAGGGCGCAAGGTGCGTTCAAAGATTCGATGATTCACTGAATTCTGCAATTCACATTACTTATCGCATTTCGCTGCGTTCTTCATCGATGACGAGTC	EF546659	SH180088.07FU	375	Fungi	p__Basidiomycota	c__Agaricomycetes	o__Agaricales	f__Pleurotaceae	g__Nematoctonus	s__Nematoctonus_leiosporus	2	292200 Nematoctonus_leiosporus	4.64887e-154	0.99	99.2	0	0	0	0	0	0	0	0	0	0	0	0	0	0	0	0	0	0	0	0	0	0	0	0	0	0	0	0	0	0	0
>a87601	Otu03993	Saprotroph	TTAAGTTCAGCGGGTAGTCCTACCTGATTTGAGGTCAAATTGTCAATAATAGGGGTAAGAAAAGCCCCTGTCGCGCATACAGGCGACGGTTGTAGGCGGGTTCCCGACCGCTTCACCCGCTGCGACGTAGATAATTATCACGCCAAAGCTGGTTCCGCAAGGTCCCACTTATGCATTTGAAGAGGAGCCGAGCCCAGAAGAGGGACCACCGGCACACTCCAAGTCCAAGCCCTGAAAACACAAAAGTTTTCAGAGTCGATGATTCAATGACACTCAAACAGGCATGCCCCTCGGAATACCAAGGGGCGCAAGGTGCGTTCAAAGATTCGATGATTCACTGAATTCTGCAATTCACATTACTTATCGCATTTCGCTGCGTTCTTCATCGATGACGAGTCT…	U66456	SH478826.07FU	401	Fungi	p__Basidiomycota	c__Agaricomycetes	o__Agaricales	f__Tricholomataceae	g__Omphalina	s__Omphalina_sp	2	330693 Omphalina_viridis	1.93617e-96	0.84	98.5037	0	0	0	0	0	0	0	0	0	0	0	0	0	0	0	0	0	0	0	0	0	0	0	0	0	0	0	0	0	0	0
>b36328	Otu02116	Saprotroph	TTAAGTTCAGCGGGTAGTCCTACCTGATTTGAGGTCAAATAAGTCAATGGTAGTTTGTCCGTGGAAACAGACGGTTAGAGAGCAGATACCCCAGGAACAACTCCTTGAAATGAAAGCAGACAGAGCAAGCTTAAGTTGCAGCTATCCCAACCAAAGAGCCTTCTTTGCCAGACACCAAGGCGTAGATAATTATCACACCAAGGCTTAGGTCCGACTAATCCGGTTTCCGCTAATGCATTTGAGAGGAGCCGAAGACATCTACTGATGCCAGCAAACCTCCACAGTCCAAGCTTCAGAAGCAAAAACTTTTGAAGTTGAGAATTTAATGACACTCAAACAGGCATGCCCCTCGGAATACCAAGGGGCGCAAGGTGCGTTCAAAGATTCGATGATTCACTG…	AY313274	SH221880.07FU	460	Fungi	p__Basidiomycota	c__Agaricomycetes	o__Agaricales	f__Marasmiaceae	g__Omphalotus	s__Omphalotus_sp	7	310285 Omphalotus_mexicanus	8.35596e-167	0.97	92.6087	0	0	0	0	0	0	0	0	0	0	0	0	0	0	0	0	0	0	0	0	0	0	0	0	0	0	0	0	0	0	0
>c70705	Otu03050	Saprotroph	TTAAGTTCAGCGGGTAGTCCTACCTGATTTGAGGTCAAATGGTCAAGAATTGTCCAAGTCAATGGACAGTTAGAAGCTGAAGCCCTATAAGATTGTAGCGTACAATAGCGTAGATAATTATCACACCATTGACGGTCCACAAAAAGGTTCCGCTAATGTGTTTAAGAGGAGCTGACTTCATGAAAGAAACCTGCAACCCCCAAATCCAAGCCTGACCAGGTAATAAAACTTGGAAAGGTTGAGAATTTAATGACACTCAAACAGGCATGCTCCTCGGAATACCAAGGAGCGCAAGGTGCGTTCAAAGATTCGATGATTCACTGAATTCTGCAATTCACATTACTTATCGCATTTCGCTGCGTTCTTCATCGTTGACGAGTCTAG	UDB011411	SH184334.07FU	384	Fungi	p__Basidiomycota	c__Agaricomycetes	o__Agaricales	f__Agaricaceae	g__Phaeolepiota	s__Phaeolepiota_aurea	2	293956 Phaeolepiota_aurea	8.04447e-156	0.99	98.4375	0	0	0	0	0	0	0	0	0	0	0	0	0	0	0	0	0	0	0	0	0	0	0	0	0	0	0	0	0	0	0
>c118223	Otu03452	Saprotroph	TTAAGTTCAGCGGGTAGTCCTACCTGATTTGAGGTCAAATTGTCATATATTGTCCGAAGACGATTAGAAGCAGTACTACTATGGCAGTTAGTCCATGGCGTAGATAATTATCACACCAATAGACAGTTCGCGCGAGCGACCAGCTAATGCATTTTAGGGGAGAAGGCTCGCGAGAAGCCTTCAAAAAAATTTCCCCCCCACATCCAAGTCTTAATTAACAAAAGCTAATAAGATTGAGAATTTAATGACACTCAAACAGGCATGCTCCTCGGAATACCAAGGAGCGCAAGGTGCGTTCAAAGATTCGATGATTCACTGAATTCTGCAATTCACATTACTTATCGCATTTCGCTGCGTTCTTCATCGTTGACGAG	FJ464595	SH032272.07FU	374	Fungi	p__Basidiomycota	c__Agaricomycetes	o__Agaricales	f__Strophariaceae	g__Pholiota	s__Pholiota_adiposa	2	326843 Pholiota_adiposa	2.65904e-148	0.97	99.7326	0	0	0	0	0	0	0	0	0	0	0	0	0	0	0	0	0	0	0	0	0	0	0	0	0	0	0	0	0	0	0
>b60690	Otu01639	Saprotroph	TTAAGTTCAGCGGGTAGTCCTACCTGATTTGAGGTCAAGTTGTCATAAAAACACACTAGGTGTCTTTGTCCAAAGGACACTTAGAAGCAGAGTCCCAACACAAGTCAGTCTGTACTATGGCGCAGATAATTATCACACCATGGGGCAGTCTGAGGAGACATTCCAGCTAATACATTTAAGAGGAGCAAGTACAAGAAGCACATGCAAACCGCCAAATCCAACATTCTCCAAGATTAGAAAAATCAAGGAGAGGTTGATAATATAATGACACTCAAACAGGCATGCTCCTCGGAATACCAAGGAGCGCAAGGTGCGTTCAAAGATTCGATGATTCACTGAATTCTGCAATTCACATTACTTATCACATTTCGCTGCGTTCTTCATCGATGACGAGTCTAG	JX968153	SH006008.07FU	399	Fungi	p__Basidiomycota	c__Agaricomycetes	o__Agaricales	f__Bolbitiaceae	g__Pholiotina	s__Pholiotina_sp	42	314401 Pholiotina_sulcata	2.91291e-117	0.88	98.4962	0	0	0	0	0	0	0	0	0	0	0	0	0	0	0	0	0	0	0	0	0	0	0	0	0	0	0	0	0	0	0
>d2818	Otu02447	Saprotroph	TTAAGTTCAGCGGGTAGTCCTACCTGATTTGAGGTCAAATTGTCAAAGATTGTCCGCATACACAGACGGGTTAGGAGCAGAATGCTTATACTAAGTGTGTAGCTGTCAATGGTATAGATAATTATCACACCAATAGACGGTTACAAAAGCTTCCGGCTAATACATTTTAGAAGAGCTGACCGAGGGGCCAACAACACTTCCACATCCAAATATATTCAATAATAAAATTGAACAATTTGATGATTTAATGACACTCAAACAGGCATGCTCTTCGGAATACCAAAGAGCGCAAGGTGCGTTCAAAGATTCGATGATTCACTGAATTCTGCAATTCACATTACTTATCGCATTTCGCTGCGTTCTTCATCGGTGACGAGTCTAG	JX968259	SH000877.07FU	382	Fungi	p__Basidiomycota	c__Agaricomycetes	o__Agaricales	f__Bolbitiaceae	g__Pholiotina	s__Pholiotina_sp	8	312034 Pholiotina_brunnea	2.4772e-136	0.94	98.4293	0	0	0	0	0	0	0	0	0	0	0	0	0	0	0	0	0	0	0	0	0	0	0	0	0	0	0	0	0	0	0
>b29936	Otu02694	Saprotroph	TTAAGTTCAGCGGGTAGTCCTACCTGATTTGAGGTCAAATGGTCAAAATTGTCTACAAGTAGACAGTTAGAAGCGAATGCTCATACTAAGTGCAGCAGTCAAAGGCATAGATAATTATCACACCTATAGACGGTTACAAGAGCTTCCGGCTAATACATTTAAGAAGAGTTGACCAGAGCCAACAACACTTCCAAGTCCAAACTTATCAATAATATAATTGAAAAGTTTGATGATTTAATGACACTCAAACAGGCATGCTCCTCGGAATACCAAGGAGCGCAAGGTGCGTTCAAAGATTCGATGATTCACTGAATTCTGCAATTCACATTACTTATCGCATTTCGCTGCGTTCTTCATCGATGACGAGTCTAG	JF908599	SH010718.07FU	372	Fungi	p__Basidiomycota	c__Agaricomycetes	o__Agaricales	f__Bolbitiaceae	g__Pholiotina	s__Pholiotina_sp	5	316483 Pholiotina_dentatomarginata	2.9521e-129	0.96	90.8602	0	0	0	0	0	0	0	0	0	0	0	0	0	0	0	0	0	0	0	0	0	0	0	0	0	0	0	0	0	0	0
>a10948	Otu01554	Saprotroph	TTAAGTTCAGCGGGTAGTCCTACCTGATTTGAGGTCAAGTTGTCAAGATATTGTCCTTTCAGACAGTTAGAAGCAAGTCTAAATTCATTCCATGGCGTCGATAATTATCACACCAATAGTCAGAGTCTAGTTGAACTCGCTAATTTATTTAAGGAGAGCAGTCTGCAATCAAGCATTCTGCACAACCCCCCACTATCCAAGCTTCACACAGTTGCAAACAGAAACTGAGGAAGTTGAGAATTTAATGACACTCAAACAGGCATGCTCCTCGGAATACCAAGGAGCGCAAGGTGCGTTCAAAGATTCGATGATTCACTGAATTCTGCAATTCACATTACTTATCGCATTTCGCTGCGTTCTTCATCGGTGACGAGTCTAG	DQ389708	SH000797.07FU	379	Fungi	p__Basidiomycota	c__Agaricomycetes	o__Agaricales	f__Psathyrellaceae	g__Psathyrella	s__Psathyrella_sp	60	311999 Psathyrella_sphaerocystis	2.9136e-125	0.91	98.4169	0	0	0	0	0	0	0	0	0	0	0	0	0	0	0	0	0	0	0	0	0	0	0	0	0	0	0	0	0	0	0
>d171136	Otu01855	Saprotroph	TTAAGTTCAGCGGGTAGTCCTACCTGATTTGAGGTCAAATTGTCATAATGTTGTCCTTGCAGACATTTAGAAGCAAGTCTAAGCTCAGTCCACGGCGTAGATAGGTTATCACACCAACAGACAGAGCTCAGATTGAACTCGCTAATACATTTCAGGGGAGCAGCCCACAATCAGGTGTTCTGCACAAACCCCCACATCCAAGCTTCACATAGTCCCATAACAAAACTAATGAAGTTGAGAATTTAATGACACTCAAACAGGCATGCTCCTCGGAATACCAAGGAGCGCAAGGTGCGTTCAAAGATTCGATGATTCACTGAATTCTGCAATTCACATTACTTATCGCATTTCGCTGCGTTCTTCATCGTTGACGAGTCTAG	DQ389708	SH000797.07FU	380	Fungi	p__Basidiomycota	c__Agaricomycetes	o__Agaricales	f__Psathyrellaceae	g__Psathyrella	s__Psathyrella_sp	17	311999 Psathyrella_sphaerocystis	8.61222e-133	0.93	98.4211	0	0	0	0	0	0	0	0	0	0	0	0	0	0	0	0	0	0	0	0	0	0	0	0	0	0	0	0	0	0	0
>a20752	Otu01838	Saprotroph	TTAAGTTCAGCGGGTAGTCCTACCTGATTTGAGGTCAAATTGTCAAAATTTGTCCTTTCAGACAGTTAGAAGCAAGTCTAAGCCCAATCCACAGTGTAGATAATTATCATACCAATAGATGGAGCCCAGTTGAAACTCACTAATTTATTTAAGGGGAGCAAAAACACTCTAAAGCATTCTGCAAACCTCCACAATCCAAGCTTCACACAGCTTCACAACAAAACTGATGAAGTTGAGAATTTAATGACACTCAAACAGACATGCTCCTCAGAATACCAAGGAGCGCAAGGTGCGTTCAAAGATTCGATGATTCACTGAATTCTGCAATTCACATTACTTATCGCATTTCGCTGCGTTCTTCATCGATGACGAGTCTAG	AM712255	SH220374.07FU	378	Fungi	p__Basidiomycota	c__Agaricomycetes	o__Agaricales	f__Psathyrellaceae	g__Psathyrella	s__Psathyrella_sp	12	309562 Psathyrella_impexa	2.30257e-128	0.92	98.4127	0	0	0	0	0	0	0	0	0	0	0	0	0	0	0	0	0	0	0	0	0	0	0	0	0	0	0	0	0	0	0
>d70114	Otu02169	Saprotroph	TTAAGTTCAGCGGGTAGTCCTACCTGATTTGAGGTCAAATTGGTCAGAGTTTGTCTTTGCAGACGGTTAGAAGCAAGTCTAAGCCCAATCCACGGCGTAGATAATTATCACACCAATAGACCGAGCCTAGTTTGAACTCGCTAATTCATTTCAGAGGAGCAGTACACCGTGAAAACAGGTTCTGCAGACCCCCACATCCAAGCTTCATCAACAAAATTGGTGAAGTTGAGAATTTAATGACACTCAAACAGGCATGCTCCTCGGAATACCAAGGAGCGCAAGGTGCGTTCAAAGATTCGATGATTCACTGAATTCTGCAATTCACATTACTTATCGCATTTCGCTGCGTTCTTCATCGATGACGAGTCTAG	DQ389691	SH031773.07FU	371	Fungi	p__Basidiomycota	c__Agaricomycetes	o__Agaricales	f__Psathyrellaceae	g__Psathyrella	s__Psathyrella_sp	7	326635 Psathyrella_sp_LO17_04	4.68248e-123	0.92	98.3827	0	0	0	0	0	0	0	0	0	0	0	0	0	0	0	0	0	0	0	0	0	0	0	0	0	0	0	0	0	0	0
>b42661	Otu02381	Saprotroph	TTAAGTTCAGCGGGTAGTCTTACCTGATTTGAGGTCAAAATTGTCATAAATGTCCAAAGGACGGTTTGAAGCTGGTCAATTAAAGCTCAAGTCCATAGCGTAGATAATTATCACACTAATAGACAGGAACCTAACCCGCTAATACATTTCAGAGGAGCAGATCACTATAGTGAACCTGCAACCCCCATATCCAAGCCTTACATAGTTTTTTCAAAAAACCAATAAGGTTGAGAAATTAATGACACTCAAACAGGCATGCTCCTCGGAATACCAAGGAGCGCAAGGTGCGTTCAAAGATTCGATGATTCACTGAATTCTGCAATTCACATTACTTATCGCATTTCGCTGCGTTCTTCATCGTTGACGAGTCTAG	UDB017928	SH019084.07FU	373	Fungi	p__Basidiomycota	c__Agaricomycetes	o__Agaricales	f__Psathyrellaceae	g__Psathyrella	s__Psathyrella_sp	5	320396 Psathyrella_canoceps	1.10079e-133	0.94	98.3914	0	0	0	0	0	0	0	0	0	0	0	0	0	0	0	0	0	0	0	0	0	0	0	0	0	0	0	0	0	0	0
>b12439	Otu01889	Saprotroph	TTAAGTTCAGCGGGTAGTCTTACCTGATTTGAGGTCAAAAATGTCAAGAGTTGTCCTGTGAAGGACGGTTAGAAGCAGGTCGTAACAGCCTTCCAATCCACGGCGTAGATAATTATCACACCAATAGATTAGGGGCCAAACCCACTAATACATTTCAGAGGAGCAGACCACAGAGTGGACCTGCAACCCCCACATCCAAGCCTACACACAACTTCATAACAAAATTGGTGAGGTTGAGAATTTAATGACACTCAAACAGGCATGCTCCTCGGAATACCAAGGAGCGCAAGGTGCGTTCAAAGATTCGATGATTCACTGAATTCTGCAATTCACATTACTTATCGCATTTCGCTGCGTTCTTCATCGATGACGAGTCTAG	EF635638	SH219038.07FU	379	Fungi	p__Basidiomycota	c__Agaricomycetes	o__Agaricales	f__Psathyrellaceae	g__unidentified	s__Psathyrellaceae_sp	4	308961 Psathyrellaceae_sp	1.68937e-154	0.99	98.4169	0	0	0	0	0	0	0	0	0	0	0	0	0	0	0	0	0	0	0	0	0	0	0	0	0	0	0	0	0	0	0
>a105225	Otu01560	Saprotroph	TTAAGTTCAGCGGGTAGTCCTACCTGATTTGAGGTCAAATGGTCATTAATATTGTCCAAAGACGATTAGAAGCAATGCAACCTCCAGTAATCCACGGCGTAGATAATTATCACACCAATAGACGGTTAGAAGGGCACCGGCTAATACATTTAAGAGGAGCTGACTTGTGAAAGCCTGCAACCTCCAAGTCCAAGCCATCTACTAGTTAATAAAAACTAGAGAGGTTGAGAATTTAATGACACTCAAACAGGCATGCTCCTCGGAATACCAAGGAGCGCAAGGTGCGTTCAAAGATTCGATGATTCACTGAATTCTGCAATTCACATTACTTATCGCATTTCGCTGCGTTCTTCATCGGTGACGAGTCTAG	KC176337	SH187730.07FU	370	Fungi	p__Basidiomycota	c__Agaricomycetes	o__Agaricales	f__Strophariaceae	g__Psilocybe	s__Psilocybe_sp	75	295524 Psilocybe_cf_subviscida/crobula_X_45	9.46736e-149	0.99	98.3784	20	2	0	0	0	0	0	0	0	0	0	0	0	0	0	0	0	0	0	0	0	0	0	3	0	0	0	0	0	0	0
>a15595	Otu01777	Saprotroph	TTAAGTTCAGCGGGTAGTCCTACCTGATTTGAGGTCAAATTGATCAAAGTGTCCGCAAAGACAATTGGAAGCCAGATGACTTGAGCTACACAGTGACGACATTATCACACCGCATATATGCTGCAAATCAATGACCAGCTAATGCATTCCAGGGAAGCTGATGAATCACCAGCAAGTCCCCAAGTCCAAGCTCACCTTTCAGCAAAGAAAGGGAGTTGATAATTACATGACACTCAAACAGGCATGCTCCTCGGAATACCAAGGAGCGCAAGGTGCGTTCAAAGATTCGATGATTCACTGAATTCTGCAATTCACATTACTTATCGCATTTCGCTGCGTTCTTCATCGATGACGAGTCTAG	FN907912	SH221537.07FU	361	Fungi	p__Basidiomycota	c__Agaricomycetes	o__Hymenochaetales	f__Schizoporaceae	g__Schizopora	s__Schizopora_sp	18	310107 Schizopora_paradoxa	3.59383e-126	0.93	98.338	0	0	0	0	0	0	0	0	0	0	0	0	0	0	0	0	0	0	0	0	0	0	0	0	0	0	0	0	0	0	0
>a25559	Otu01643	Saprotroph	TTAAGTTCAGCGGGTAGTCCTACCTGATTTGAGGTCAAGATTGTCATTGTATTGTCCGAATGATGGACGGTTAGAAGCAGCATCATGGTCGTCTAACAGCATAGATAATTATCACACTGATAGTCGGGTCCACAAGGGCACCGCTAATGCATTTCAGGGGAGCCGACCTCGTTAATGAAGCCAGCAAAATAACCCCCACATCCAAGCCTTAGTTTGCAAAAGCTAGTAAGGTTGAGAATTTAATGACACTCAAACAGGCATGCTCCTCGGAATACCAAGGAGCGCAAGTTGCGTTCAAAGATTCGATGATTCACTGAATTCTGCAATTCACATTACTTATCGCATTTCGCTGCGTTCTTCATCGATGACGAGTCTAG	HQ533028	SH003260.07FU	377	Fungi	p__Basidiomycota	c__Agaricomycetes	o__Agaricales	f__Inocybaceae	g__Simocybe	s__Simocybe_sp	29	313091 Simocybe_sp_PDD_95840	4.33599e-111	0.88	98.4085	0	0	0	0	0	0	0	0	0	0	0	0	0	0	0	0	0	0	0	0	0	0	0	0	0	0	0	0	0	0	0
>b68635	Otu04188	Saprotroph	TTAAGTTCAGCGGGTAGTCCTACCTGATTTGAGGTCAAAATTGTCAAAGTCCTTGTCCGAGTACACGGACGGTTAGAAGCAGGCTTTAAACACGCGCCTAAGCAGTGTAGATAGATTATCACACTGAATAGTCGGGAAAGACATCCGCTAATACATTTCAGGGGAGCTGAACTCATCACAAGCCAGCAAAAACCCCCATATCCAAGCCTCACTTCGCAAAAGCTGGTAAGGTTGAGAAATTTAATGACACTCAAACAGGCATGCTCCTCGGAATACCAAGGAGCGCAAGATGCGTTCAAAGATTCGATGATTCACTGAATTCTGCAATTCACATTACTTATCGCATTTCGCTGCGTTCTTCATCGATGACGAGTCTAG	HQ533028	SH003260.07FU	378	Fungi	p__Basidiomycota	c__Agaricomycetes	o__Agaricales	f__Inocybaceae	g__Simocybe	s__Simocybe_sp	2	313091 Simocybe_sp_PDD_95840	2.42112e-101	0.85	98.4127	0	0	0	0	0	0	0	0	0	0	0	0	0	0	0	0	0	0	0	0	0	0	0	0	0	0	0	0	0	0	0
>a28785	Otu04656	Saprotroph	TTAAGTTCAGCGGGTAGTCCTACCTGATTTGAGGTCAGATAACAAAGTGATATTGTCCAAGTCAATGGACTATTAGAAGCAATCACATCCCATGGTCTATTCACTATAGCGCTACAAAGAATTTGTGTTCTTCTTAATCAAAAAAAGGTCAAGCTTGAGAGTATTCACGACACTCAAACAGGCATACTCCTCGGAATACCAAGGAGTGCAAGATGCGTTCAAAGACTCGATGATTCACTGAATTCCGCAATTCACATTACGTTTCGCACGTTCGCTGCGTTCTTCATCGTTGCCGAGTCTAG	KF675253	SH221133.07FU	302	Fungi	p__Basidiomycota	c__Agaricomycetes	o__Geastrales	f__Geastraceae	g__Sphaerobolus	s__Sphaerobolus_sp	2	309915 Sphaerobolus_sp	2.92365e-60	0.98	53.6424	0	0	0	0	0	0	0	0	0	0	0	0	0	0	0	0	2	0	0	0	0	0	0	0	0	0	0	0	0	0	0
>a81177	Otu02252	Saprotroph	TTAAGTTCAGCGGGTAGTCCTACTTGATTTGAGGTCAGATGTTCAGAGTATTGTCCTCGCGGACGGTTCGAAGCCAGAACCACGTTCAACCGAGGCGAGGCAGCGTAGACAATTATCACGCTGGATCACGCTCAGTTCAGTTCAAGCTAATGCGTTTCAGAGGAGCCCGTGTCCGAGAGGACGCCGGCAAGACCTCCAAGTCCAAGCCCAACCCGTGTCCAAAAAACACAGGAGGGTTGAGAATACCATGACACTCAAACAAGCATGCTCTTCGGAATACCAAAGAGCGCAAGGTGCGTTCAAAGATTCGATGATTCACTGAATTCTGCAATTCACATTACTTATCGCATTTCGCTGCGTTCTTCATCGATGACGAGTCTAG	EU118668	SH196317.07FU	382	Fungi	p__Basidiomycota	c__Agaricomycetes	o__Polyporales	f__Meruliaceae	g__Steccherinum	s__Steccherinum_sp	2	299497 Steccherinum_fimbriatum	5.38925e-104	0.85	98.4293	0	0	0	0	0	0	0	0	0	0	0	0	0	0	0	0	0	0	0	0	0	0	0	0	0	0	0	0	0	0	0
>a30339	Otu01340	Saprotroph	TTAAGTTCAGCGGGTAGTCCTACCCGATTTGAGGTCAAAATAGATCAGAAAAGACGCGCATATATGCGGTCTAAACCGGTCGTGTCTCAGTAAAGAGACGATTAGAAGCAAGCCCAACGAGGCCGCACTTTGACGCAGATAATTATCACGCCAGAGACACGGTCAGCACAGGGAAGTCTCGCTAATGTATTTAAAGGGAGCCGACTTGTGAAAGCCCGCAAACCCTCAAAACCAAGCCTCGAGCTACAAAAATGCAGTCGAGTTTGATGATTAAATGACACTCAAACGGGCATACCTTACGGAATACCATAAGGTGCAAGGTGCGTTCAAAGATTCGATGATTCACTGAAATCTGCAATTCACATTACTTATCGCATTTCGCTGCGTTCTTCATCGGTG…	AB520316	SH472533.07FU	409	Fungi	p__unidentified	c__Agaricomycetes	o__Russulales	f__Stephanosporaceae	g__unidentified	s__Stephanosporaceae_sp	298	329817 Stephanosporaceae_sp	3.48949e-137	0.92	98.533	0	0	0	0	0	0	0	0	0	0	0	0	0	0	0	0	0	0	0	0	0	0	0	0	0	0	0	0	0	0	0
>b35736	Otu01373	Saprotroph	TTAAGTTCAGCGGGTAGTCCTACCCGATTTGAGATCAAAAAGGTTTGGAAATCGTGCGCATATATATGCACTCAAAATCCTGTTGTCCGAAGACGATTAGAAGCAAGCCCAACGAGAACCGACGTTGACACAGATAACTATCATGCCAATGAGACCGGCTCAAACAAAGGGAAGTCTCGCTAATGAATTTAAAGGGAGCTGACTTTGGGAAAAGCCTGCAGAACCCTCAAGACCAAGCCTCGAAAACACAAAGGTTTTGAGGTTGAAGATTTAATGATACTCAAACGGGCATACCCTGCGGAATACCACAGGGTGCAAGGTGCGTTCAAAGATTCGATGATTCACTGAAATCTGCAATTCACATTACTTATCGCATTTCGCTGCGTTCTTCATCGTTGA…	AB846964	SH215973.07FU	408	Fungi	p__Basidiomycota	c__Agaricomycetes	o__Russulales	f__Stephanosporaceae	g__unidentified	s__Stephanosporaceae_sp	270	307617 Stephanosporaceae_sp	6.06427e-143	0.95	93.3824	0	0	0	0	0	0	0	0	0	0	0	0	0	0	0	0	0	0	0	0	0	0	0	0	0	0	0	0	0	0	0
>a4528	Otu01674	Saprotroph	TTAAGTTCAGCGGGTAGTCCTACCCGATTTGAGATCAAAAAGGCTTGGAAAATGTGCGCATATATGCACCCAAATTCCTGTTGTCCGTAAAGACGATTAGAAGCAAGCCCAACGAGAACCAACGTCGACACAGATAATTATCATGCCAATGAGACGGTTCAAACACAGGGAAGTCTCGCTAATGAATTTAAAGGGAGCCGACTTGTAAAAAGCCTGCAAGACCCTCAAGACCAAGCTTCAAAAACACAAAGGTTTTGAAGTTGAGAATTTAATGATACTCAAACGGGCATGCCCTGCGGAATACCACAGGGCGCAAGGTGCGTTCAAAGATTCGATGATTCACTGAAATCTGCAATTCACATTACTTATCGCATTTCGCTGCGTTCTTCATCGTTGACG…	AB846964	SH215973.07FU	406	Fungi	p__Basidiomycota	c__Agaricomycetes	o__Russulales	f__Stephanosporaceae	g__unidentified	s__Stephanosporaceae_sp	46	307617 Stephanosporaceae_sp	1.17409e-129	0.92	93.3498	0	0	0	0	0	0	0	0	0	0	0	0	0	0	0	0	0	0	0	0	0	0	0	0	0	0	0	0	0	0	0
>a11888	Otu01664	Saprotroph	TTAAGTTCAGCGGGTAGTCCTACCCGATTTGAGATCAAAAAGGCTTGGAAAATGTGTGCATATATGCACCCAAAATCCTGTTGTCTGTAAAGACGATTAGAAGCAAGCCCAACGAGAACCAACGTCGACACAGATAATTATCATGCCAATGAGACAGTTCAAACAAAGGGAAGTCTCGCTAATGAATTTAAAGGGAGCTGACTTTAAAAAAAGCCTGCAAGACCCTCAAGACCAAGCTTCAAAAACACAAAGGTTTTGAAGTTGAGAATTTAATGATACTCAAACGGGCATGCCCTGCGGAATACCACAGGGCGCAAGGTGCGTTCAAAGATTCGATGATTCACTGAAATCTGCAATTCACATTACTTATCGCATTTCGCTGCGTTCTTCATCGGTGAC…	AB846964	SH215973.07FU	407	Fungi	p__Basidiomycota	c__Agaricomycetes	o__Russulales	f__Stephanosporaceae	g__unidentified	s__Stephanosporaceae_sp	22	307617 Stephanosporaceae_sp	2.5886e-132	0.92	93.3661	0	0	0	0	0	0	0	0	0	0	0	0	0	0	0	0	0	0	0	0	0	0	0	0	0	0	0	0	0	0	0
>c74829	Otu04156	Saprotroph	TTAAGTTCAGCGGGTAGTCCCACCTGATTTGAGGTCAAGTTTCATAAAATTGTCCAATAATGGACGGTTAGAAAGCACGTCTCTTAACAGTAACGGATCCGACGACGTAGATAATTATCACACCGAAGGTTACGAAACAACGAGTCGCACTAATGCATTTAAGAGGGGGCGATCTCTAATAGATACCGCCAAAGACCTCCAAGTCCAATCCCTTAAACTCCAACAAAGGAGCAAGGGTTGAGAATTTCACGACACTCAAACAGGTGTACCCTCCGGAATACCAGAGGGTGCAAGGTGCGTTCAAAGATTCGATGATTCACTGAATTCTGCAATTCACATTACTTATCGCATTTCGCTGCGTTCTTCATCGATGACGAGTCTAG	JX317102	SH023456.07FU	383	Fungi	p__Basidiomycota	c__Agaricomycetes	o__Russulales	f__Stereaceae	g__unidentified	s__Stereaceae_sp	2	322642 uncultured_Stereaceae	3.95389e-130	0.93	98.4334	0	0	0	0	0	0	0	0	0	0	0	0	0	0	0	0	0	0	0	0	0	0	0	0	0	0	0	0	0	0	0
>c51019	Otu04153	Saprotroph	TTAAGTTCAGCGGGTAGTCCTACCTGATTTGAGGTCAAAATTTCAATAAGACTGTCCTAAAGGACTATTGTAAGCAAAGACTCAAAAGCTTCAGTCAAATGCGATGATCATTGTCACATCAACAATTGCAAAACTTATCCTTGCTAATGCATTTCAGAGGAGCCGACAGAAATTGCCAGCATTCCCTCCACAATCCAACCATCCATGTACACTTTTGAAACAACAAAAATGTAAGGCGTTGAGAATTTAATGACACTCAAACAGGCATACTCCTCGGAATACCAAGGAGTGCAAGGTGCGTTCAAAAATTCGATGATTCACGGAAAATCTGCAATTCACATTACATATCGCAATTCGCTACGTTCTTCATCGATGACGAGTCTAG	UDB011756	SH214572.07FU	385	Fungi	p__Basidiomycota	c__Agaricomycetes	o__Boletales	f__Tapinellaceae	g__Tapinella	s__Tapinella_atrotomentosa	2	307050 Tapinella_atrotomentosa	2.23773e-155	0.99	98.4416	0	0	0	0	0	0	0	0	0	0	0	0	0	0	0	0	0	0	0	0	0	0	0	0	0	0	0	0	0	0	0
>c72466	Otu03443	Saprotroph	TTAAGTTCAGCGGGTAGTCCTACCTGATTTGAGGTCAGAATTTCAAAGTTTGTTTTGACCGCCACTCATAAGGCAGGTCGTGGAGGGGCACAAAGAAGGGGGAACATCTCGTTAAAGCGAGGATAATACAACGCCCAATCGAGTTCGACCCACAGGCCCAACCGACGCATTTGAGGGGAGCCACCTCTCGGCAGCAAGCCCCCAGCTCCAACCCGAAACCGCACGAAACGGTAGGGGTTGATGACTTCAAGACACTCAAACAGGCATGCTCCTCGGAATACCAAGGAGCGCAAGGTGCGTTCAAAGATTCGATGATTCACTGAATTCTGCAATTCACATTACTTATCGCATTTCGCTGCGTTCTTCATCGTTGACGAGTCTAG	FJ820507	SH213080.07FU	383	Fungi	p__Basidiomycota	c__Agaricomycetes	o__Trechisporales	f__Hydnodontaceae	g__Trechispora	s__Trechispora_sp	2	306389 Trechispora_sp	2.6403e-144	0.97	98.4334	0	0	0	0	0	0	0	0	0	0	0	0	0	0	0	0	0	0	0	0	0	0	0	0	0	0	0	0	0	0	0
>a143119	Otu02216	Saprotroph	TTAAGTTCAGCGGGTAGTCTTACCTGATTTGAGGTCAAAAGTCAAAAGGGGGGGTTTGTTATGAGCAGGTTTTCTTGCCTAATCTCAGATGGTGATAACTTATCACACCTGTATCGATCCAGCATGATGATCCTACTAATGCATTTCAAAGAAGCCGACTCTGGTGTAAGCCAGCAATCTTCAAGTCCAAAGCAGAGCTTTGAGAATTAAATGACACTCAAACAGGCATGCCCTTTGGAATACCAAAGGGCGCAAGGTGCGTTCAAAGATTCGATGATTCACTGAGATCTGCGATTCACATTACTTATCGCATTTCGCTGCGTTCTTCATCGATGACGAGGTCTAG	UDB015728	SH027737.07FU	346	Fungi	p__Basidiomycota	c__Agaricomycetes	o__Agaricales	f__Tricholomataceae	g__Tricholomopsis	s__Tricholomopsis_sp	9	324717 Tricholomopsis_rutilans	1.19516e-122	0.94	97.9769	0	0	0	0	0	0	0	0	0	0	0	0	2	3	0	0	0	0	0	0	0	0	0	0	0	0	0	0	0	0	0
>a30540	Otu01600	Saprotroph	TTAAGTTCAGCGGGTAGTCCTACCTGATTTGAGGTTAAATTGTCATAAATTGTCCACAGAGGGACGGTTATAAGCAGCACAACCCATATAAAGCAGATGTCCACGGCGTAGATATTATCACACCAATAGACGATTCCACACGGGTACCGCTAATGCATTTCAGAGGAGCTGACTTCGTTAGAAACCTGCAAACCTCCATATCCAAGCCATACCAGCTTCGTGAAAAGTTGATAGGTTGAGAATTTAATAACACTCAAACAGGCATGCTCCTCGGAATACCAAGGAGCGCAAGGTGCGTTCAAAGATTCGATGATTCACTGAATTCTGCAATTCACATTACTTATCGCATTTCGCTGCGTTCTTCATCGTTGACGAGTCTAG	UDB011461	SH186579.07FU	381	Fungi	p__Basidiomycota	c__Agaricomycetes	o__Agaricales	f__Inocybaceae	g__Tubaria	s__Tubaria_sp	65	295006 Tubaria_conspersa	1.55201e-142	0.96	98.4252	0	0	0	0	0	0	0	0	0	0	0	0	0	0	0	0	0	44	0	0	0	0	0	0	0	0	0	0	0	0	0
>a35001	Otu01705	Saprotroph	TTAAGTTCAGCGGGTAGTCCTACCTGATTTGAGGTTAAATTGTCATAAGTTGTCCACAGAGGGACGGTTATAAGCAGCACAACCCATATAAAGCAGATGTCCACGGCGTAGATATTATCACACCAATAGACGATTCCGCACGGGTACCGCTAATACATTTTAGAGGAGCTGACTTCGTTAGAAACCTGCAAGCCTCCATATCCAAGCCATACCAGCCTCGTGAAAAGTTGATAGGTTGAGAATTTAATAACACTCAAACAGGCATGCTCCTCGGAATACCAAGGAGCGCAAGGTGCGTTCAAAGATTCGATGATTCACTGAATTCTGCAATTCACATTACTTATCGCATTTCGCTGCGTTCTTCATCGATGACGAGTCTAG	UDB011461	SH186579.07FU	381	Fungi	p__Basidiomycota	c__Agaricomycetes	o__Agaricales	f__Inocybaceae	g__Tubaria	s__Tubaria_sp	26	295006 Tubaria_conspersa	7.05953e-140	0.95	98.4252	0	0	0	0	0	0	0	0	0	0	0	0	0	0	0	0	0	8	0	0	0	0	0	0	0	0	0	0	0	0	0
>a83326	Otu02294	Saprotroph	TTAAGTTCAGCGGGTAGTCCTACCTGATTTGAGGTCAAACACTTGAATGGTTGTCCTTGCGGACGACTGGAAGCAACCCCTCCTGCGGTTCCAAACTCAGCGAGTGATACTTATCACACCGAGCAAGCGAAACCACTACAGAGGTCAGCTAATGCATTTGGGACGAGCCGAAGCAAAGCCGGCAAAAAAGACGTCCAAGTCCAAAAGCCCAGAGCCGATCTTAACAAAAGGCTCGGGTTTTGAGAGTTTCAAGACACTCAAACAGGCATACCCTTCGGAATACCAAAGGGTGCAAGGTGCGTTCAAAGATTCGATGATTCACTGAATTCTGCAATTCACATTACTTATCGCATTTCGCTGCGTTCTTCATCGTTGACGAGTCTAG	KJ010077	SH016823.07FU	385	Fungi	p__Basidiomycota	c__Agaricomycetes	o__Gloeophyllales	f__Gloeophyllaceae	g__Veluticeps	s__Veluticeps_sp	4	319232 Veluticeps_sp_SHH_2014	2.60145e-74	0.78	98.4416	0	0	0	0	0	0	0	0	0	0	0	0	0	0	0	0	0	0	0	0	0	0	0	0	0	0	0	0	0	0	0
>a13267	Otu01640	Saprotroph	TTAAGTTCAGCGGGTAGTCCTACCTGATTTGAGGTCAAGTGGTCAAAATAAAATTGTGATGTCCGAGATTGTGCTCGGACTGTTTGGAGCAGACAACGTGTATGCTGGACCAGGCGGCATAAAGATTATTATCACACCGGCGGCAGACAGCACGGACTACTAATGCTTTTCAGGGGAGTCGATTCGCAATGGAGCCGACAAAGTTTTCCCCCCCATGATCCAACCCATCCTACCAGACAAAACTGGAGGGGAGCTGAGAGATTTATGACACTCAAACAGGCATGCTCCTCGGAATACCAAGGAGCGCAAGGTGCGTTCAAAGATTCGATGATTCACTGAATTCTGCAATTCACATTACTTATCGCATTTCGCTGCGTTCTTCATCGTTGACGAGTCTAG	UDB011742	SH221286.07FU	399	Fungi	p__Basidiomycota	c__Agaricomycetes	o__Agaricales	f__Pluteaceae	g__Volvopluteus	s__Volvopluteus_gloiocephalus	35	309978 Volvopluteus_gloiocephalus	1.9069e-162	0.99	98.4962	0	0	0	0	0	0	0	0	0	0	0	0	0	0	0	0	0	0	0	0	0	0	0	2	0	0	0	0	0	0	0
>c98089	Otu03504	Saprotroph	TTAAGTTCAGCGGGTAGTCCTACCTGATTTGAGGTCAGATCTTAAGGAATTGTCCGAAGACGGTTAGAAGCCACATCCAAGCGAGCAGCCACCAAGTGTAGATACTTATCACACTCTGAGCCAACCCACGGACAAGCAGCTAATACATTTAAGAAGAGCCGGCTTGAGAGCCAGCAAGCTTCCAAATCCAAGCTTCAGAGTAATAAAACTATGAAGTTGATAATTTCATGACACTCAAACAGGCATACTCCTCGGAATACCAAGGAGTGCAAGGTGCGTTCAAAGATTCGATGATTCACTGAATTCTGCAATTCACATTACTTATCGCATTTCGCTACGTTCTTCATCGATGACGAGTCTAG	FJ475670	SH192727.07FU	362	Fungi	p__Basidiomycota	c__Agaricomycetes	o__Polyporales	f__Xenasmataceae	g__Xenasmatella	s__Xenasmatella_sp	2	297840 Xenasmatella_sp	3.03721e-137	0.96	98.3425	0	0	0	0	0	0	0	0	0	0	0	0	0	0	0	0	0	0	0	0	0	0	0	0	0	0	0	0	0	0	0
>a3521	Otu01265	Unclassified	TTAAGTTCAGCGGGTAGTCCTACCTGATTTGAGGTCAAATTGTCAATGTATTGTCCGAAGACGATTAGAAGCGGCCAACATGTCAGACCAATAGCGTAGATAATTATCACACCATAGTCTGGCAGTCAATGCCAGCTAATATATTTAAAGGGAGTCGATTTGCACCAACAACCCTCAAAGTCCAAAGCCAATAGACAATAAAGCTATTGGTTTGAGAATTTAATGACACTCAAACAGGCATGCTCTTCGGAATACCAAAGAGCGCAAGGTGCGTTCAAAGATTCGATGATTCACTGAATTCTGCAATTCACATTACTTATCGCATTTCGCTGCGTTCTTCATCGATGACGAGTCTAG	EF635823	SH026368.07FU	357	Fungi	p__Basidiomycota	c__Agaricomycetes	o__Agaricales	f__unidentified	g__unidentified	s__Agaricales_sp	913	324080 Agaricales_sp	8.80297e-145	0.99	98.3193	0	4	0	0	0	0	0	0	0	2	0	0	0	0	0	0	0	0	0	0	0	0	0	0	0	0	0	0	0	0	0
>c26419	Otu01358	Unclassified	TTAAGTTCAGCGGGTAGTCCTACCTGATTTGAGGTCAGATTGTCAAATATTGTCTGTGAAGACGATTAGAAGCGAAGCCTCAACATGTCACTTCTCAATGGCGTAGATAATTATCACACCAGAGAATAGCGGCAAAAGCTCTGCTAATGCATTTAAGGATAGCCGACTCAGGAAGCCCGCAAATCCCATGATCCAAGCCATACAGGTTAATAAAAACTTGTATAGTTGAGAATTTAATGACACTCAAACAGGCATGCTCCTCGGAATACCAAGGAGCGCAAGGTGCGTTCAAAGATTCGATGATTCACTGAATTCTGCAATTCACATTACTTATCGCATTTCGCTGCGTTCTTCATCGTTGACGAGTCTAG	KC176279	SH190259.07FU	371	Fungi	p__Basidiomycota	c__Agaricomycetes	o__Agaricales	f__unidentified	g__unidentified	s__Agaricales_sp	302	296718 Agaricales_sp	1.55782e-146	0.98	98.3827	0	0	0	0	0	0	0	0	0	0	0	0	0	0	0	0	0	0	0	0	0	0	0	0	0	0	0	0	0	0	0
>a5282	Otu01347	Unclassified	TTAAGTTCAGCGGGTAGTCCTACCTGATTTGAGGTCAAAATTGTCATTTGCTGTCCAAAAGGACGGTTAGAAGCAGTGCTTTTGAAATATTCACCCTATGGCGCAGATAGTTATCACACCAGTAGACAGGCAAAAGAAAGACACCAGCTAATGCATTTCAGGGGAGCAGACTCGTATGATAAGCCAGCAAAAGAAACCCCCACATCCAAAGCCAACTGGGAAGCAAGAGCAACCCAGCTGGTTTGAGAATTTAAATGACACTCAAACAGGCATGCTCCTCGGAATACCAAGGAGCGCAAGGTGCGTTCAAAGATTCGATGATTCACTGAATTCTGCAATTCACATTACTTATCGCATTTCGCTGCGTTCTTCATCGTTGACGAGTCTAG	JX434647	SH207080.07FU	389	Fungi	p__Basidiomycota	c__Agaricomycetes	o__Agaricales	f__unidentified	g__unidentified	s__Agaricales_sp	235	303940 Agaricales_sp	1.33971e-153	0.98	98.4576	0	28	0	0	0	0	0	0	0	0	0	0	0	0	0	0	0	0	0	0	0	0	0	0	0	0	30	0	0	0	0
>a133	Otu01434	Unclassified	TTAAGTTCAGCGGGTAGTCCTACCTGATTTGAGGTCAAAGGTTCAAAATTGTCCATTACAGACGGTTATAAGCAGGTTCCCACAAGTTTTGCTTCACAGTACAAACGGCGTAGATAATTATCACACCAAGTGACCGTCCACAAAGGATCCCACTAATGCTTTTAAAGGGAGCAGACCATCCACTGAAGGAAGCCAGCAAAACCCTCACATCCAAGCCATTGAAAAGACAAGCCTTTCAAGGTTGAGAATTTAATGACACTCAAACAGGCATGCCCTTCGGAATACCAAAGGGCGCAAGGTGCGTTCAAAGATTCGATGATTCACTGAATTCTGCAATTCACATTACTTATCGCATTTCGCTGCGTTCTTCATCGATGACGAGTCTAG	JF519455	SH184926.07FU	387	Fungi	p__Basidiomycota	c__Agaricomycetes	o__Agaricales	f__unidentified	g__unidentified	s__Agaricales_sp	160	294253 Agaricales_sp	1.37263e-157	1	97.1576	0	0	0	0	0	0	0	0	2	0	23	35	0	0	0	0	0	0	0	0	0	34	0	0	0	0	0	0	0	0	0
>a52954	Otu01606	Unclassified	TTAAGTTCAGCGGGTAGTCCTACCTGATTTGAGGTCAAATGGTTCAAGTTGTCCGAAGACGGTTAGAAGCAGGGCAAACACCTTTTTACAGCAATCCTAAGGATCCACGGCGTAGATAATTATCACACCAATAGATAGGTTTGCGCGGGGCACCCACTAATTCATTTGAGAGGAGCAGACTTTTCAGCCTGCAAAAAACCTCCACTTCCAAGCCATCATCACAAAAGCGATGAGGTTGAGAATTTAATGACACTCAAACAGGCATGCTCGTCGGAATACCAACGAGCGCAAGGTGCGTTCAAAGATTCGATGATTCACTGAATTCTGCAATTCACATTACTTATCGCATTTCGCTGCGTTCTTCATCGTTGACGAGTCTAG	KC176293	SH178704.07FU	381	Fungi	p__Basidiomycota	c__Agaricomycetes	o__Agaricales	f__unidentified	g__unidentified	s__Agaricales_sp	58	291580 Agaricales_sp	7.73225e-152	0.98	98.4252	0	0	0	0	0	0	0	0	0	0	0	0	0	0	3	0	0	0	0	0	0	0	0	2	0	0	0	0	0	0	0
>c40570	Otu01679	Unclassified	TTAAGTTCAGCGGGTAGTCCTACCTGATTTGAGGTCAAGATGTTATTAAATTGTCCCGGTAAGAGACGGTTATAAGCAGGGTCCCATAAATTTGCTTCAAGGTCAAACGGCATAGATAATTATCACACCAAGTGACGGTCCACAAGAGATCCCGCTAATGAATTTAAGGGGAGCAGACCATCCACTGAAGGAAGCCAGCAAAAACCCCCACGTCCAAGCCTCAGCTCAAGCCGGTAAAAGCGAGCAAGGTTGATAATTTAATGACACTCAAACAGGCATGCCCTTCGGAATACCAAAGGGCGCAAGGTGCGTTCAAAGATTCGATGATTCACTGAATTCTGCAATTCACATTACTTATCGCATTTCGCTGCGTTCTTCATCGTTGACGAGTCTAG	FR750663	SH214441.07FU	395	Fungi	p__Basidiomycota	c__Agaricomycetes	o__Agaricales	f__unidentified	g__unidentified	s__Agaricales_sp	44	306997 Agaricales_sp	6.59245e-159	0.99	97.2152	0	0	0	0	0	0	0	0	0	0	0	0	0	0	0	0	0	0	0	0	0	0	0	0	0	0	0	0	0	0	0
>b57634	Otu02010	Unclassified	TTAAGTTCAGCGGGTAGTCCTACCTGATTTGAGGTCAAATTGTCAAGGTATTGTCCTTGCGGACGGTTAGAAGCGAGTCTAAGCCCCGATCCACGGCGTAGATAATTATCACACCAATAGACGGAGCTCAGTATCGAACTCGCTAATGCATTTCAGGGGAGCAGACCGCGCTGAGGCAGCCTGCACAAACCCCCACATCCAAGCCTCGGAGAACAGTTCAGAAAACTGGTGAGGTTGAGAATTTAATGACACTCAAACAGGCATGCTCCTCGGAATACCAAGGAGCGCAAGGTGCGTTCAAAGATTCGATGATTCACTGAATTCTGCAATTCACATTACTTATCGCATTTCGCTGCGTTCTTCATCGATGACGAGTCTAG	JN159575	SH220362.07FU	380	Fungi	p__Basidiomycota	c__Agaricomycetes	o__Agaricales	f__unidentified	g__unidentified	s__Agaricales_sp	18	309552 Agaricales_sp	6.11078e-155	0.99	98.4211	0	0	0	0	0	0	0	0	0	0	0	0	0	0	0	0	0	0	0	0	0	0	0	0	0	0	0	0	0	0	0
>d187967	Otu01987	Unclassified	TTAAGTTCAGCGGGTAATCCTACCTGATTTGAGGTCAGATTGTCAAATGTTGTCTGTGAAGACGATTAGAAGCGAAGCCTCAACATGTCACTTCTCAATGGCGTAGATAATTATCACACCGTAGATTAGCGGCAAAAGCTCTGCTAATGCATTTAAGGATAGCCGACTCAGGAAGCCCGCAAACCCCATGATCCAAGCCATACAGGTTAATAAAAACTTGTATAGTTGAGAATTTAATGACACTCAAACAGGCATGCTCCTCGGAATACCAAGGAGCGCAAGGCGCGTTCAAAGATTCGATGATTCACTGAATTCTGCAATTCACATTACTTATCGCATTTCGCTGCGTTCTTCATCGGTGACGAGTCTAG	KC176279	SH190259.07FU	371	Fungi	p__Basidiomycota	c__Agaricomycetes	o__Agaricales	f__unidentified	g__unidentified	s__Agaricales_sp	14	296718 Agaricales_sp	2.02561e-147	0.98	98.3827	0	0	0	0	0	0	0	0	0	0	0	0	0	0	0	0	0	0	0	0	0	0	0	0	0	0	0	0	0	0	0
>d25893	Otu02830	Unclassified	TTAAGTTCAGCGGGTAGTCCTACTTGATTTGAGATCAAATGGTTCAAATTGTCAATAAAGACGGTTTGAGAGCAGCTACATTAGATCCGTTCTTACAAGGCGTAGATATTATCACACCAAGAAGTGGAATCAATAACCACTAATGCTTTTAAGAAGAGCAGACTTTACAAGAAGCCTGCAACCTCCACATCCAAAGCCACTGACTTGATATAAAACCAAGTAGTGGTTTGAGAATTTAATGATACTCAAACAAGCATACTCTTCGGAATACCAAAGAGTGCAAGGTGCGTTCAAAGATTCGATGATTCACTGAATTCTGCAATTCACATTACTTATCGCATTTCGCTGCGTTCTTCATCGTTGACGAGTCTAG	KC753423	SH178424.07FU	373	Fungi	p__Basidiomycota	c__Agaricomycetes	o__Agaricales	f__unidentified	g__unidentified	s__Agaricales_sp	5	291460 Agaricales_sp	5.82733e-151	0.99	98.3914	0	0	0	0	0	0	0	0	0	0	0	0	0	0	0	0	0	0	0	0	0	0	0	0	0	0	0	0	0	0	0
>a98854	Otu01932	Unclassified	TTAAGTTCAGCGGGTAGTCCTACCTGATTTGAGGTCAAGAAGTTCATTAAACATTGTCCATAACGGACGATTAGCAGCTGAACTAGTCAGAGAGCAATCCATCACAGTGTAGATAATTATCACACTAGTGACGGGACTGCAAACGGTTCCGCTAATGTATTTCAGGAGAGCTGACCTTTACCATCAGTAAAGACCCGCAAGCCCCCATATCCAAGCCCCATCACAACTCGCAAAAGCTGGAGGGGTTGAGAATTTAATGACACTCAAACAGGCATGCTCCTCGGAATACCAAGGAGCGCAAGGTGCGTTCAAAGATTCGATGATTCACTGAATTCTGCAATTCACATTACTTATCGCATTTCGCTGCGTTCTTCATCGATGACGAGTCTAG	JX029934	SH175885.07FU	391	Fungi	p__Basidiomycota	c__Agaricomycetes	o__Agaricales	f__unidentified	g__unidentified	s__Agaricales_sp	4	290278 Agaricales_sp	5.00982e-158	0.99	98.4655	0	0	0	0	0	0	0	0	0	0	0	0	0	0	0	0	0	0	0	0	0	0	0	0	0	0	0	0	0	0	0
>b14991	Otu01719	Unclassified	TTAAGTTCAGCGGGTAGTCCTACCTGATTTGAGGTCAGATGATTCAAATATTGTCTCATGAAGAGACGATTTGAAGCAGAGTCTACAGGGACTTCAAGGCGTAGATAATTATCACACCAAGGATCCAACTATATAAACCCCAGCTAATACATTTGAGAAGAGTCGACTTGCGCCAACAGCTTCCAAGTCCAAATACAACAATCAAAAAAAATTATTGTATTTGAGAGATTCATGACACTCAAACAGGCATGCTCTTCGGAATACCAAAGAGCGCAAGGTGCGTTCAAAGATTCGATGATTCACTGAATTCTGCAATTCACATTACATATCGTAATTCGCTGCGTTCTTCATCGATGACGAGTCTAG	DQ900583	SH185030.07FU	366	Fungi	p__Basidiomycota	c__Agaricomycetes	o__unidentified	f__unidentified	g__unidentified	s__Agaricomycetes_sp	47	294301 Agaricomycetes_sp	7.18793e-148	0.99	98.3607	0	0	9	0	0	0	0	0	0	0	0	0	0	0	0	0	0	0	0	0	0	0	0	0	0	0	0	0	0	0	0
>a104545	Otu01784	Unclassified	TTAAGTTCAGCGGGTAGTCCTACCTGATTCGAGGCCAGATTTGAAATGAAACACCAGTAAAGGCGGTCCTCAAAGGACGATTAGAAGCCTTCGAACTAACGATTCAGCGCCTTGACGGCTGCCCGCGTTGATGTATTATCACACGGTTTAACTGAAATCGAAATCTACAGCTAATACGTTCGAGACGAGCCGAACTCGCGTCCAGCAACGTCCAAATCCAAGCCCGACATCAATAAAGATGCGGTTTGAGAGTTTCATGACACTCGAACAGGCATACTCCTCGGAATACCAAGGAGTGCAAGGTGCGTTCAAAGATTCGATGATTCACTGAATTCTGCAATTCACATTACTTATCGCATTTCGCTGCGTTCTTCATCGTTGACGAGTCTAG	DQ421269	SH023479.07FU	391	Fungi	p__Basidiomycota	c__Agaricomycetes	o__unidentified	f__unidentified	g__unidentified	s__Agaricomycetes_sp	26	322656 Agaricomycetes_sp	2.14462e-147	0.96	98.4655	0	5	2	0	0	0	0	0	0	0	4	0	0	0	0	0	0	0	0	0	0	0	0	0	0	0	0	0	0	0	0
>c113104	Otu02023	Unclassified	TTAAGTTCAGCGGGTAGTCCTACCTGATTTGAGGTCAAGAATCAAATTATGCTTTGCCCCCAAAGGGACAGTCCCCCCCCTTAGGGCGGGACAATTAGAAGCAATACCTGGGTTCACCGGCAACAGATCAGATAAAACACATTATCAAACTGGAGCTGGTTCTACACGGTCCTGCTAATGAATTTTAAAGGAGCTGACGATGATTTATCTTCAGCAAAGCCTTCAACGTCCAAGCGCAGCAAGGCTTGAAAAGCCTCAAAGCGTTGATGTATTAATGACTCTCAAACAGGCATACCCTTTGGAATGCCAAAGGGTGCAATGTGCGTTCAAAGATTCGATGATTCACTGAATTCTGCAATTCACATTACATATCGCAATTCGCTACGTTCTTCATCGATG…	FJ553288	SH197587.07FU	409	Fungi	p__Basidiomycota	c__Agaricomycetes	o__unidentified	f__unidentified	g__unidentified	s__Agaricomycetes_sp	7	300096 Agaricomycetes_sp	3.74275e-79	0.77	98.533	0	0	0	0	0	0	0	0	0	0	0	0	0	0	0	0	0	0	0	0	0	0	0	0	0	0	0	0	0	0	0
>a109280	Otu03417	Unclassified	TTAAGTTCAGCGGGTAGTCCTACCTGATTTGAGGTCAGATGATTCAGTACGATACAGTAGTATCCGTGATTATAAGCAATCCATTATCTCTGGAAAAGTCCTCAGCGGGTGATACTTATCACGCCAAGTGGATAAATCCATGATATTAAGACCAGCTAATAGATTTCGGATGAGCCGGGTGACATATAACAGTCCAGCAAACATCCAATGTCCAAACAGACAACTGTTAATAAAAACAATGGTTGTTTGATATATTCATGACACTCAAACAGGCATGCTCCTCGGAATACCAAGGAGCGCAAGATGCGTTCAAAGATTCGATGATTCACTGAATTCTGCAATTCACATTACTTATCTCATTTCGCCACGTTCTTCATCGATGACGAGTCTAG	DQ421256	SH204680.07FU	392	Fungi	p__Basidiomycota	c__Agaricomycetes	o__unidentified	f__unidentified	g__unidentified	s__Agaricomycetes_sp	3	302960 Agaricomycetes_sp	5.38956e-100	0.85	97.1939	0	0	0	0	0	0	0	0	0	0	3	0	0	0	0	0	0	0	0	0	0	0	0	0	0	0	0	0	0	0	0
>c14411	Otu01592	Unclassified	TTAAGTTCAGCGGGTAGTCCTACCTGATTTGAGGTCGAATTTGTCAGAGTCGCAGGGCGCACGAGGCGTCGAGCGGGTGGTGAAGCTTTGATTGGAAGGACCGACCGACGTAGATATTTATCACATCGGAGTCGCTGACCGATCTGGAAAGCTCATGCATTCAAGAGGAGCCGACAAGCTCTCCCGAGGGAGTGCGCCAGCAGTTATCCTCCAAGTCCAACTTCACGCCGGGTCGAAGAAACCCGGTGCAGTTGAGAATTTCATGACACTCAAACAGGCATGCTCCTCGGAATACCAAGGAGCGCAAGGTGCGTTCAAAGATTCGATGATTCACTGAATTCTGCAATTCACATTACTTATCGCATTTCGCTGCGTTCTTCATCGATGACGAGTCTAG	UDB016092	SH177588.07FU	397	Fungi	p__Basidiomycota	c__Agaricomycetes	o__Thelephorales	f__Thelephoraceae	g__Amaurodon	s__Amaurodon_sp	71	291089 Amaurodon_mustialaensis	1.33108e-149	0.97	95.7179	0	0	0	0	0	0	0	0	0	0	0	0	0	0	0	0	0	0	0	0	0	0	0	0	0	0	0	0	0	0	0
>a95423	Otu01444	Unclassified	TTAAGTTCAGCGGGTAGTCCTACCTGATTTGAGGCCAAAGTGTTAAGTAAGTTGTCCACAAGGGACGATTAGAAGCTGCACATATAGAACAGGCCTAAGGCGACGGCGCAGATAATTATCACACCATGCCGAGCACTGTAAAAAGCACAAGCTAATGCATTTCAGGATGAGCCAATTACGGCACAATCCAAATCCACCACAATACAATTGTAACATCGTAAGGGTGAGGGTTTACGTGACTCTCAAACAGGCATGCTCCATGGAATACCAAGGAGCGCAAGTTGCGTTCAAAGATTCGATGATTCACTGAATTCTGCAATTCACATTACGTATCGCATTTCGCTGCGTTCTTCATCGGTGACGAGTCTAG	GU181854	SH209795.07FU	370	Fungi	p__Basidiomycota	c__Agaricomycetes	o__Auriculariales	f__unidentified	g__unidentified	s__Auriculariales_sp	123	305069 Auriculariales_sp	1.23103e-149	0.99	98.3784	2	0	0	0	0	0	0	0	0	0	0	0	0	0	0	0	0	0	0	0	0	0	0	0	0	0	0	0	0	0	0
>c67582	Otu01749	Unclassified	TTAAGTTCAGCGGGTAGTCCTACCTGATTTCAGGCCAAAGTTTGAATAGTTGTCCGTAATAGACGATTAGAAGCAGCACGTTCAGAAGAGGCCTAAGGCGAGGGTGCAGATAATTATCACACCGTGCCAAGCACTCTAACAAGCGCAAGCTAATGCATTTCAGGACGAGCCATTTACGGCACGGTCCAAGTCCACAACCTGCGACTTTAACATCGCAAGCGTGAGGGTTTACGTGACACTGAAACAGGCATGCTCCATGGAATACCAAGGAGCGCAAGATGCGTTCAAAGATTCGATGATTCACTGAATTCTGCAATTCACATTACTTATCGCATTTCGCTACGTTCTTCATCGATGACGAGTCTAG	FJ237097	SH024177.07FU	367	Fungi	p__Basidiomycota	c__Agaricomycetes	o__Auriculariales	f__unidentified	g__unidentified	s__Auriculariales_sp	39	322991 Auriculariales_sp	2.99474e-133	0.95	98.3651	0	0	0	0	0	0	0	0	0	0	0	0	2	0	0	0	0	0	0	0	0	0	0	0	0	0	0	0	0	0	0
>a837	Otu02831	Unclassified	TTAAGTTCAGCGGGTAGTCCTACCTGATTTGAGGCCAAAGCTTTAAATGTGTCTGTTGTCCGCAAGGGACCGTTGGAAGCAGCGTCGCTGGAGGTGGCCTAAGGCGAGCCGAGGAAATTATCACGGCAGCACCGAGCACACCAATGGGCGCAAAGCTAATGCATTTCAAGACGAGCCAACTACGGCAACGTCCAAGTCCACCCGAGCGGCTTTGACACCGCGGGGGCGAGGGTTAACGTGACACTCAAACAGGCATGCCCCGCGGAATACCACGGGGCGCAAGGTGCGTTCAAAGATTCGATGATTCACTGAATTCTGCAATTCACATTACTTATCGCATTTCGCTGCGTTCTTCATCGGTGACGAGTCTAG	FN610890	SH205313.07FU	372	Fungi	p__Basidiomycota	c__Agaricomycetes	o__Auriculariales	f__unidentified	g__unidentified	s__Auriculariales_sp	2	303200 Auriculariales_sp	3.72387e-126	0.92	98.3871	0	0	0	0	0	0	0	0	0	0	0	0	0	0	0	0	0	0	0	0	0	0	0	0	0	0	0	0	0	0	0
>b94342	Otu01593	Unclassified	TTAAGTTCAGCGGGTAGTCCTACCTGATTTGAGGTCAAACTTCAAAATGTTTTGCAACAAGTGCAAGTGATTACATGGCCATATAACATTCATTATCCTCAAGTTAATAAGCATCAACTGCAACTAAGGCTAAGATTGTTAAAGACCTATTTGTTTAAGAAATGACATAGACAAAGACATAGTCTACAGCAGTTTCCAAAGCCAAATACACTTGGTAACAAAACCAAATGATTTGAATGATGTAATGACACTCAAACAGGCATACCTTCTGGATTACCAAAAGGTGCAATGTGCGTTCAAAGATTCAATGATTCACGGAATTCTGCAATTCACATTACTTATCGCATTTGGCTGCGTTCTTCATCGATGACGAGTCTAG	JX857804	SH221414.07FU	379	Fungi	p__Basidiomycota	c__Agaricomycetes	o__unidentified	f__unidentified	g__unidentified	s__Basidiomycota_sp	42	310038 Lyomyces_sp_11_MPM_2012	7.67596e-51	0.73	98.4169	0	0	0	0	0	0	0	0	0	0	0	0	0	0	0	0	0	0	0	0	0	0	0	0	0	0	0	0	0	0	0
>b93495	Otu01726	Unclassified	TTAAGTTCAGCGGGTAGTCCTACCTGATTTGAGGTTAAAAATTATATAAATGTGTGTTTTGTTCTTAGCACCGTCAAAACTACTTATCATGAGAAAACAAGAATGTTAGAAATCAATTAACGAATAAACAATTATAACGCCATTGGTTCCTATATCCTGACTTTGACAAATAATAATGCAAGCCACTCATGATTTTCAGTAGAGCAAACGTACCAAAAGTACAGTCGCAACCACCACTACCATAACCAAGACTCAATATCGTTACCAATATTGGGGTATGATGTGTTTTTATAACCCTCAAACAGGCATGCCCTGGGGAATAGCCCCAGGGCGCAAGATGCGTTCAAAGACTCGATGATTCACTAATTCTGCAGTTCACAATAAATATCGCAATTTGCC…	FJ237086	SH030851.07FU	425	Fungi	p__Basidiomycota	c__Agaricomycetes	o__Agaricales	f__unidentified	g__unidentified	s__Basidiomycota_sp	23	326233 Coprinopsis_sp	3.64457e-36	0.75	56.4706	0	0	0	0	0	0	0	0	0	0	0	0	0	0	0	0	0	0	0	0	0	0	0	0	0	0	0	0	0	0	0
>a15956	Otu01742	Unclassified	TTAAGTTCAGCGGGTATTCCTACCTGATCTGAGGTCAAACTTTAAAATGTTAATCCCAAAGGACAAGACAATAGAAAGTAGGACATCTACTGCTACCTTGAAGTTGAGAAAATGCTTGCTACAACTAAGGAACAGTAGACGCTCGTCAATGCATTACAGAAGAAACCGCAGTAGTAAAACTGACAATTTACTTCCAAAACCAAGCCACTTCTAATAAAAGAAAGGTTTGAATGGTGTAATGACGCTCAGACAGGCATGCCTTCCGGATTACCAGAAGGCGCAATGTGCGTTCAAAGATTTGATGATTCACGGAATTCTGCAATTCACATTACTTATCGCATTTTGCTGCGTTCTTCATCGGTGACGAGTCTAG	FJ827158	SH188646.07FU	373	Fungi	p__Basidiomycota	c__Agaricomycetes	o__unidentified	f__unidentified	g__unidentified	s__Basidiomycota_sp	18	296041 Cortinarius_sp	7.56892e-51	0.73	98.3914	0	0	0	0	0	0	0	0	0	0	0	0	0	0	0	0	0	0	0	0	0	0	0	0	0	0	0	0	0	0	0
>c103878	Otu02025	Unclassified	TTAAGTTCAGCGGGTAGTCCTGCCTGATTTGAGGTCAAATCGTGAGAGCGTGTTTGTGTTCAAGGCTGGCACAGGTAGGAAGCAGGTAAGACATGTATGTGTATCATACCGACAACGAAGCCGTGACGCCGATCCATTTCAGAGAAGCACAGCAAAGCAAAGGGTTAGCTGCCAGCAATGCATCCTCCACCGATCCAGGCCCCACTGTCTTGAAGGTGTATTGGACGTTGTCCATCCACATCAGACAGCACGGGTAGTGAGAATTTGACGACACTCAAACAGGCATGCTCCTCGGAATGCCAAGGAGCGCAAGGTGCGTTCAAAGATTCGATGATTCACTGAATTCTGCAATTCACATTACTTATCGCATTTCGCTGCGTTCTTCATCGATGACGAGTC…	FN397406	SH013385.07FU	402	Fungi	p__Basidiomycota	c__Agaricomycetes	o__unidentified	f__unidentified	g__unidentified	s__Basidiomycota_sp	9	317662 Agaricales_sp	3.05761e-55	0.75	98.5075	0	0	0	0	0	0	0	0	0	0	0	0	0	0	0	0	0	0	0	0	0	0	0	0	0	0	0	0	0	0	0
>c18055	Otu02162	Unclassified	TTAAGTTCAGCGGGTAGTCCCACCTGATTTGAGGTCAAAATTGGTCATAAAGGGCACCCAGAAAATGGGCGACGAGATTAGAAGCATGGGAAGTGGTCGTCTATGTCAACTGGCACAAAATACAAGTATTTTTACCATGCCAACGACTGGTGCATACAACACCACAGCCATTGCTAATGTATTTCAGAGGAGCAGGCCCTTCAAAACGAGCCTGCATACTCCAACAATCCAAACCAACCACTCCAGCCCTGGGGGGGCAAGATTGGAAGATTTGAGGAATTTAATGACACTCAAACAGGCGTGCTCCTCGGAATGCCAAGGAGCGCAAGATGCGTTCAAAGATTCGATGATTCACTGAATTCTGCAATTCACATTACTTATCGCATTTCGCTGCGTTCT…	KF291123	SH175954.07FU	418	Fungi	p__Basidiomycota	c__Agaricomycetes	o__unidentified	f__unidentified	g__unidentified	s__Basidiomycota_sp	8	290311 Hygrophoraceae_sp	3.2984e-59	0.74	98.5646	0	0	0	0	0	0	0	0	0	0	0	0	0	0	0	0	0	0	0	0	0	0	0	0	0	0	0	0	0	0	0
>c117197	Otu02516	Unclassified	TTAAGTTCAGCGGGTAGTCCCGCCTGATTCGAGGTCAAAGTTGAAAAAGCGGAAAAGTAGAGACAGTTAAGCCCCCACTTTAAACCAGATTAGAAGCGACTCGAGGACAAGTCTGGCCATCCCGAAAGATGTCCTCAGCGGTCAGATAATTATCACGCTGAGTAGAACCAGTCTCATAACCAAGATTCAGCTAATGCTTTTAAGACTAGCCGTCATTACACGGCAAAGTCCAAATCCAAACCAAGACTGACAATAAAGCCAATCCCAGCTTGAGAATTTCACGACACTCGAACAGGCGTGCTCCCCGGAATACCAGGGAGCGCAAGGTGCGTTCAAAGATTCGATGATTCACTGAATTCTGCAATTCACATTACTTATCGCAATTCGCTGCGTTCTTCA…	FJ820519	SH198075.07FU	415	Fungi	p__Basidiomycota	c__Agaricomycetes	o__Cantharellales	f__unidentified	g__unidentified	s__Cantharellales_sp	7	300307 Cantharellales_sp	2.81359e-140	0.92	98.5542	0	0	0	0	0	0	0	0	0	0	0	0	0	0	0	0	0	0	0	0	0	0	0	0	0	0	0	0	0	0	0
>c82499	Otu02673	Unclassified	TTAAGTTCAGCGGGTAGTCCCGCCTGATTCGAGGTCAAAGTTGAAAAATATCATGATGATGAGTTAGAAGCAGCCCAAGGCAGGCTTGGCCATCCCGAGAGATGTCCTCAGCGGTCATAGATTATCACGCTGAGTAGAACCAAATCCCACAACAAGGACCAGCTAATACATTTGAGACCAGCCGTTCCAGACAAGGAGACAGCAGAGTCCAATAACCAAATAGATGACACTAAAGCATCTAGCTTGAGAGTTTCACGACACTCGAACAGGCGTGCTCCTCGGAATACCAAGGAGCGCAAGGTGCGTTCAAAGATTCGATGATTCACTGAATTCTGCAATTCACATTACTTATCGCATTTCGCTGCGTTCTTCATCGATGACGAGTCTAG	DQ899094	SH185808.07FU	389	Fungi	p__Basidiomycota	c__Agaricomycetes	o__Cantharellales	f__unidentified	g__unidentified	s__Cantharellales_sp	4	294635 Cantharellales_sp	4.97973e-158	0.99	98.4576	0	0	0	0	0	0	0	0	0	0	0	0	0	0	0	0	0	0	0	0	0	0	0	0	0	0	0	0	0	0	0
>b44429	Otu02979	Unclassified	TTAAGTTCAGCGGGTAGTCCTACCTGATTTGAGATCAGATCATAAATTTTAATTGTCTAAACCAATAGACGATTAGGAGCGGTTCTCATCTGCAAAATCCCGGCCACTTTACAGTGTCCTCAACGAGTGGATTTACTCTTATCACGCCGAGTGGAACCGAGGGGGGGCTCGCTGAGATCCAGCTAATGCATTTGAGAGGAGCAGACCGTAAAAAATCTGCAAACGTCCAAAATAAAATCGATTGAATGAACAAAAGATTTATTTTGAGGGTTTCATGATACTCAAACAGGCATGCTCCGAGGAATACCAAGGAGCGCAAGGTGCGTTCAAAGATTCGATGATTCACTGAATTCTGCAATTCACATTACTTATCGCATTTCGCCGCGTTCTTCATCGGTG…	AM697948	SH186412.07FU	409	Fungi	p__Basidiomycota	c__Agaricomycetes	o__Cantharellales	f__unidentified	g__unidentified	s__Cantharellales_sp	2	294935 Cantharellales_sp	1.72038e-111	0.87	98.533	0	0	0	0	0	0	0	0	0	0	0	0	0	0	0	0	0	0	0	0	0	0	0	0	0	0	0	0	0	0	0
>b78508	Otu04070	Unclassified	TTAAGTTCAGCGGGTAGTCCCGCCTGATTCGAGGTCAAAAGGTTGAAAAGTTCGTCAGCCCCGAAAAGCTTCGGAGAATTAGAAGCAACTCTAGATGAGTCCTGGCCACCCTCCCGAAAGAAGATGTCCTCAACGGTCATGAGTAATTATCACGCTGAGTAGAACCAAATCCCACAACAAGAGTCAGCTAATACATTTAAGACCAGCCGCTGCCAACTGAATGGCAAAGGAAAGCGTCCAGCTCCAGAACTTCACGACAATCGAACAGGCGTGCTCCTCGGAATACCAAGGAGCGCAAGGTGCGTTCAAAGATTCGATGATTCACTGAATTCTGCAATTCACATTACTTATCGCAATTCGCTGCGTTCTTCATCGTTGACGAGTCTAG	FJ820519	SH198075.07FU	388	Fungi	p__Basidiomycota	c__Agaricomycetes	o__Cantharellales	f__unidentified	g__unidentified	s__Cantharellales_sp	2	300307 Cantharellales_sp	2.01903e-73	0.8	98.4536	0	0	0	0	0	0	0	0	0	0	0	0	0	0	0	0	0	0	0	0	0	0	0	0	0	0	0	0	0	0	0
>a102204	Otu01403	Unclassified	TTAAGTTCAGCGGGTAGTCCTACCTGATTTGAGATCAGATCATAAAAATTAATTTATTGTCCAAGTCAATGGACTATTAGAAGCGGTTCATCTGCATTTACCTTGGCCACCTTTTACAGTGTCCTCAGCGATAGATAACTTATCACGCTGAGTGGAACCAAGCATAACACTGAGATCCAGCTAATGAACAAAGAGGAGCAGGTGTGAAGCTGCAATGGCCTCCAATACCAAAGTAGAAACCAATTGAGTTAACAAAAGATTTACTTTGAAGATTTCATGATACTCAAACAGGCATGCTCCAAGGAATACCAAGGAGCGCAAGGTGCGTTCAAAGATTCGATGATTCACTGAATTCTGCAATTCACATTACTTATCGCATTTCGCTGCGTTCTTCATCGT…	DQ093646	SH218653.07FU	411	Fungi	p__Basidiomycota	c__Agaricomycetes	o__Cantharellales	f__Ceratobasidiaceae	g__unidentified	s__Ceratobasidiaceae_sp	203	308756 Ceratobasidiaceae_sp	1.51813e-161	0.99	95.8637	0	0	0	0	0	0	0	0	0	0	0	0	0	0	0	0	0	0	6	0	0	0	0	0	0	0	0	0	0	3	0
>a38309	Otu01771	Unclassified	TTAAGTTCAGCGGGTAGTCCTACCTGATTTGAGATCAGATCATAAAGGTATTGTCCAAGCCAATGGACTATTGGAAGCGGTTCATCTGCATTTACCTTGGCCACCTTTTTACAGTGTCCTCAGCGATAGATAATTTATCACGCCGAGTGGAACCAAGCATAACACTGAGATCCAGCTAATGCACAAAGAGGAGCAGGTGTGAAGCTGCAAAGGACCTCCAATACCAAAGTGAAACCAATTGAATTAACAAAAGATTTACTTTGAAGAATTCATGATACTCAAACAGGCATGCTCCAAGGAATACCAAGGAGCGCAAGGTGCGTTCAAAGATTCGATGATTCACTGAATTCTGCAATTCACATTACTTATCGCATTTCGCTGCGTTCTTCATCGTTGACG…	JQ676887	SH218647.07FU	406	Fungi	p__Basidiomycota	c__Agaricomycetes	o__Cantharellales	f__Ceratobasidiaceae	g__unidentified	s__Ceratobasidiaceae_sp	37	308750 Ceratobasidiaceae_sp	2.4548e-159	0.98	98.5222	0	0	0	0	0	0	0	0	0	0	26	0	0	0	0	0	0	0	0	0	0	0	0	0	0	0	0	0	0	0	0
>c30629	Otu01827	Unclassified	TTAAGTTCAGCGGGTAGTCCTACCTGATTTGAGATCAAACTTAAGGGTAATTTTGTCTAAGTTAATAGACCGTTAGAAGCGGTTCAATCAGTATTTTCCTGGCCACCTTTTTAACAGTGTCCTCAGCGAGTGATACTTATCACGCCGAGTGGAACCAAGCATAATACTGAGATCCAGCTAATGCATTTAAGAGGAGCAGACGGTGAAAATCTGCAAAGACCTCCAAGTCCAAAGCAAACCCAATTGAATTTAACAAAAGGATCGACTTTGAGATTTGCTCATGATACTCAAACAGGCATGCTCCAAGGAATACCAAGGAGCGCAAGGTGCGTTCAAAGATTCGATGATTCACTGAATTCTGCAATTCACATTACTTATCGCATTTCGCTGCGTTCTTCA…	EU090897	SH008016.07FU	415	Fungi	p__Basidiomycota	c__Agaricomycetes	o__Cantharellales	f__Ceratobasidiaceae	g__unidentified	s__Ceratobasidiaceae_sp	17	315285 Ceratobasidiaceae_sp	2.44303e-155	0.96	98.5542	0	0	0	0	0	0	0	0	0	0	0	0	0	0	0	0	0	0	0	0	0	0	0	0	0	0	0	0	0	0	0
>a14243	Otu01897	Unclassified	TTAAGTTCAGCGGGTAGTCCTACCTGATTTGAGATCAGATCATAAATTTTTAATTTGTCCAAGTCAATGGACTATTAGAAGCGGTTCATCTGCATTGCCTGGCCACCTTTTTAACAGTGTCCTCAGCGAGTGATACTTATCACGCCGAGTGGAACCAAGTGTATACTGAGATCCAGCTAATTTATTTAAGAGGAGCAGACTGTGACATCTGCAAAGGCCTCCAAATCCAAAGCAAAGACCAGTTGAATTAACAAAAGGTTTACTTTGAGAATTTCATGATACTCAAACAGGCATGCTCCAAGGAATACCAAGGAGCGCAAGGTGCGTTCAAAGATTCGATGATTCACTGAATTCTGCAATTCACATTACTTATCGCATTTCGCTGCGTTCTTCATCGAT…	KJ489320	SH174256.07FU	410	Fungi	p__Basidiomycota	c__Agaricomycetes	o__Cantharellales	f__Ceratobasidiaceae	g__unidentified	s__Ceratobasidiaceae_sp	11	289610 Ceratobasidiaceae_sp	3.43062e-168	0.99	98.5366	0	0	0	0	0	0	0	0	0	0	0	0	0	0	0	0	0	0	0	0	0	0	0	0	0	0	0	0	0	0	0
>d161807	Otu02198	Unclassified	TTAAGTTCAGCGGGTAGTCCTACCTGATTTGAGATCAGATCATACTAATAGTGTCCAAGTCAATGGACTATTAGAAGCGGTTCATCTGCATTTACCTTGTCCACTTTTTACAGTGTCCTCAGCGATAGATAATTTATCACGCTGAGTGGAACCAAGCATAACACTGAGATCCGGCTAATACACAAAGAGGAGCAGGTGTGAAGCTGCAATAGACCTCCAATACCAAAATCAAACTAATTGAGTTAACAAAAAGATTGATTTTGAAGATTTCATGATACTCAAACAGGCATGCTCCAAGGAATACCAAGGAGCGCAAGGTGCGTTCAAAGATTCGATGATTCACTGAATTCTGCAATTCACATTACTTATCGCATTTCGCTGCGTTCTTCATCGATGACG…	AY387535	SH218646.07FU	406	Fungi	p__Basidiomycota	c__Agaricomycetes	o__Cantharellales	f__Ceratobasidiaceae	g__unidentified	s__Ceratobasidiaceae_sp	10	308749 Ceratobasidiaceae_sp	7.01735e-163	0.98	98.5222	0	0	0	0	0	0	0	0	0	0	0	0	0	0	0	0	0	0	0	0	0	0	0	0	0	0	0	0	0	0	0
>c80035	Otu02353	Unclassified	TTAAGTTCAGCGGGTAGTCCTACCTGATTTGAGATCAGATCATAAATTAGATATTGTCCAAGTCAATGGACTATTAGAAGCGGTTCATCTGCATTTACCTTGGCCACCCCTTTTTAACAGGGTGTCCTCAGCGATAGATAACTTATCACGCTGAGTGGAACCAAGCATAACACTGAGATCCAGCTAATGCACAAAGAGGAGCAGGTGTGAAGCTGCAATAATCCTCCAATACCAAAGCAGAACCAATTGAATTAACAAAAGGTTTGACTTTGAAGATTTCATGATACTCAAACAGGCATGCTCCAAGGAATACCAAGGAGCGCAAGGTGCGTTCAAAGATTCGATGATTCACTGAATTCTGCAATTCACATTACTTATCGCATTTCGCTGCGTTCTTCA…	KJ669084	SH218648.07FU	415	Fungi	p__Basidiomycota	c__Agaricomycetes	o__Cantharellales	f__Ceratobasidiaceae	g__unidentified	s__Ceratobasidiaceae_sp	9	308751 Ceratobasidiaceae_sp	1.18077e-160	0.97	98.3133	0	0	0	0	0	0	0	0	0	0	0	0	0	0	0	0	0	0	0	0	0	0	0	0	0	0	0	0	0	0	0
>c94118	Otu02362	Unclassified	TTAAGTTCAGCGGGTAGTCCTACCTGATTTGAGATCAGATCATAAAAATATTGTCCAAGTCAATGGACTACTAGAAGCGGTTCATCTGCATTTCCCTTGGCCACCTGTTACAGTGTCCTCAGCGATAGATAACTTATCACGCTGAGTGGAACCAAGCGTAACACTGAGATCCAGCTAATGAACAAAGAAGAGCAGGTGTGAAGCTGCAAAGACCTCCAATACCAAAGTAGGACCAATTGAGTTAACAAAAGATTTACTTTGAAGATTTCATGATACTCAAACAGGCATGCTCCAAGGAATACCAAGGAGCGCAAGGTGCGTTCAAAGATTCGATGATTCACTGAATTCTGCAATTCACATTACTTATCGCATTTCGCTACGTTCTTCATCGATGACGAG…	KJ489351	SH218651.07FU	404	Fungi	p__Basidiomycota	c__Agaricomycetes	o__Cantharellales	f__Ceratobasidiaceae	g__unidentified	s__Ceratobasidiaceae_sp	9	308754 Ceratobasidiaceae_sp	2.44069e-159	0.97	98.5149	0	0	0	0	0	0	0	0	0	0	0	0	0	0	0	0	0	0	0	0	0	0	0	0	0	0	0	0	0	0	0
>c67943	Otu02968	Unclassified	TTAAGTTCAGCGGGTAGTCCTACCTGATTTGAGATCAGATCATAAATATTGTAGATATTTATTGTTGTCCAAATAAATGGACTATTAGAAGCGGTTCATCTGCATTGCCTGGCCACCTTTTTAACAGTGTCCTCAGCGAGTGATACATTATCACGCCGAGTAGGAACCAAGTGTATACCGAGATCCAGCTAATTTATTTAAGAGGAGCAGACTGTGAAATCTGCAAGACCTCCAAATCCAAAGCACAACCAATTGAATGAACAAAAGATTTTACTTTGAGAATTTCATGATACTCAAACAGGCATGCTCCAAGGAATACCAAGGAGCGCAAGGTGCGTTCAAAGATTCGATGATTCACTGAATTCTGCAATTCACATTACTTATCGCATTTCGCTGCGT…	FR750642	SH218111.07FU	421	Fungi	p__Basidiomycota	c__Agaricomycetes	o__Cantharellales	f__Ceratobasidiaceae	g__unidentified	s__Ceratobasidiaceae_sp	4	308531 Ceratobasidiaceae_sp	2.15692e-170	0.99	98.5748	0	0	0	0	0	0	0	0	0	0	0	0	0	0	0	0	0	0	0	0	0	0	0	0	0	0	0	0	0	0	0
>c27621	Otu03006	Unclassified	TTAAGTTCAGCGGGTAGTCCTACCTGATTTGAGATCAGATCATAAAAATATTGTCCAAGTCAATGGACTACTAGAGGCGGTTCATCTGCATTTCCCTTGGCCACCTGTTACAGTGTCCTCAGCGATAGATAACTTATCACGTTGAGTGGAACCAAGCATAACACTGAGATCCAGCTAATGAACAAAGAGGAGCAGGTGTGAAGCTGCAAAGACCTCCAATACCAAAGTAGGACCAATTGAGTTAACAAAAGATTTACTTTGAAGATTTCATGATACTCAAACAGGCATGCTCCAAGGAATACCAAGGAGCGCAAGGTGCGTTCAAAGATTCGATGATTCACTGAATTCTGCAATTCACATTACTTATCGCATTTCGCTGCGTTCTTCATCGTTGACGAG…	KJ489351	SH218651.07FU	404	Fungi	p__Basidiomycota	c__Agaricomycetes	o__Cantharellales	f__Ceratobasidiaceae	g__unidentified	s__Ceratobasidiaceae_sp	3	308754 Ceratobasidiaceae_sp	2.44069e-159	0.97	98.5149	0	0	0	0	0	0	0	0	0	0	0	0	0	0	0	0	0	0	0	0	0	0	0	0	0	0	0	0	0	0	0
>c4800	Otu03047	Unclassified	TTAAGTTCAGCGGGTAGTCCTACCTGATTTGAGATCAGATCATAATAATAGTGTCCAAGTCAATGGACTATTAGAAGCGGTTCATCTGCATTTACCTTGGCCACTTTTTACAGTGTCCTCAGCGATAGATAAATCATCACACTGAGAGCCAGCTAATACACAAAGAGGAGCAGGTGTGAAGCTGCAAAAGACCTCCAATACCAAAATCAAACTAATTGAGTTAACAAAAAGATTGATTTTGAAGATTTCATGATACTCAAACAGGCATGCTCCAAGGAATACCAAGGAGCGCAAGGTGCGTTCAAAGATTCGATGATTCACTGAATTCTGCAATTCACATTACTTATCGCATTTCGCTGCGTTCTTCATCGGTGACGAGTCTAG	AY387535	SH218646.07FU	384	Fungi	p__Basidiomycota	c__Agaricomycetes	o__Cantharellales	f__Ceratobasidiaceae	g__unidentified	s__Ceratobasidiaceae_sp	3	308749 Ceratobasidiaceae_sp	1.13375e-133	0.93	98.4375	0	0	0	0	0	0	0	0	0	0	0	0	0	0	0	0	0	0	0	0	0	0	0	0	0	0	0	0	0	0	0
>d174648	Otu03376	Unclassified	TTAAGTTCAGCGGGTAGTCCTACCTGATTTGAGATCAGATCATATAATAAAAGTCTAAATAGACGGAGATTAGAAGCCGGTCTGCACAAAAATCCCGGCCACTTTTTTTACAGTGTCCTCAGCGAGTGATGATACTTATCACGCCGAGTGGAACCGAGAGCTTTACTGAGAGATCCAAGCTAATGCATTTAAGAGGAGCAAAATGTGAATCTGCAAAGACCTCCAAGTCCAAAATAAAATCAATTAAAAGATTTATTTTGAGAATTTCATGATACTCAAACAGGCATGCTCCAAGGAATACCAAGGAGCGCAAGGTGCGTTCAAAGATTCGATGATTCACTGAATTCTGCAATTCACATTACTTATCGCATTTCGCTGCGTTCTTCATCGTTGACGAGT…	JX860439	SH008953.07FU	403	Fungi	p__Basidiomycota	c__Agaricomycetes	o__Cantharellales	f__Ceratobasidiaceae	g__unidentified	s__Ceratobasidiaceae_sp	3	315729 uncultured_Ceratobasidium	4.68939e-111	0.87	98.5112	0	0	0	0	0	0	0	0	0	0	0	0	0	0	0	0	0	0	0	0	0	0	0	0	0	0	0	0	0	0	0
>c129895	Otu02661	Unclassified	TTAAGTTCAGCGGGTAGTCCTACCTGATTTGAGATCAAATCATAAGAGTAATTGTCTAAGCTAATAGACCATTAGAAGCGGTTCGTCTGCGATCCCGGCCACCTTTTTACAGCGTCCTCGGCGAGTGATACTTATCACGCCGAGTGGAACCGAGCTCACTGAGATCCAGCTAATATATTTAAGAGGAGCAGACGTGAATCTGCAGACCTCCAAGTCCAAAACAAAACCAATCGAATGAACAAAAGGTATTTGCTTTGAGGATTTCATGATACTCAAACAGGCATGCTCCGAGGAATACCAAGGAGCGCAAGGTGCGTTCAAAGATTCGATGATTCACTGAATTCTGCAATTCACATTACTTATCGCATTTCGCTGCGTTCTTCATCGATGACGAGTCTAG	HM141044	SH015369.07FU	400	Fungi	p__Basidiomycota	c__Agaricomycetes	o__Cantharellales	f__Ceratobasidiaceae	g__unidentified	s__Ceratobasidiaceae_sp	2	318540 uncultured_Ceratobasidiaceae	1.79989e-154	0.97	98.5	0	0	0	0	0	0	0	0	0	0	0	0	0	0	0	0	0	0	0	0	0	0	0	0	0	0	0	0	0	0	0
>c1373	Otu03429	Unclassified	TTAAGTTCAGCGGGTAGTCCTACCTGATTTGAGATCAGATCATAATAATAGTGTCCAAGTCAATGGACTATTAGAAGCGGTTCATCTGCATTTACCTTGGCCACTTTTTACAGTGTCCTCAGCGATAGATAATTTATCGCGCTGAGTGGAACCAACCATAACACAAAGATGAGCAGGTGTGAAGCTGCAAAAGACCTCCAATACCAAAATCAAACTAATTGAGTTAACAAAAAGATTGATTTTGAAGATTTCATGATACTCAAACAGGCATGCTCCAAGGAATACCAAGGAGCGCAAGGTGCGTTCAAAGATTCGATGATTCACTGAATTCTGCAATTCACATTACTTATCGCATTTCGCTGCGTTCTTCATCGTTGACGAGTCTAG	AY387535	SH218646.07FU	387	Fungi	p__Basidiomycota	c__Agaricomycetes	o__Cantharellales	f__Ceratobasidiaceae	g__unidentified	s__Ceratobasidiaceae_sp	2	308749 Ceratobasidiaceae_sp	3.27078e-137	0.94	98.4496	0	0	0	0	0	0	0	0	0	0	0	0	0	0	0	0	0	0	0	0	0	0	0	0	0	0	0	0	0	0	0
>a102545	Otu03815	Unclassified	TTAAGTTCAGCGGGTAGTCCTACCTGATTTGAGATCAGATCATAAATATATTTGTCCAAGTTAATGGACTATTGGAAGCGGTTCATCTGCATTTCCCTTGGCCACCTTTATTGTTTTTTTAGAAAAAAAAAGAAGTGTCCTCAGCGATAGATAACTTATCACGCCGAGTGGAACCAAGCATAACACTGAGATCCAGCTAATATACAAAGAGGAGCAGGTGTGAAGCTGCAATAGACCTCCAAATCCAAAGTGAAACCAATTGAATTAACAAAAAGATTTACTTTGAGAATTTCATGATACTCAAACAGGCATGCTCCAAGGAATACCAAGGAGCGCAAGGTGCGTTCAAAGATTCGATGATTCACTGAATTCTGCAATTCACATTACTTATCGCATTTC…	AM697935	SH218699.07FU	428	Fungi	p__Basidiomycota	c__Agaricomycetes	o__Cantharellales	f__Ceratobasidiaceae	g__unidentified	s__Ceratobasidiaceae_sp	2	308802 Ceratobasidiaceae_sp	4.83334e-173	0.99	98.3645	0	0	0	0	0	0	0	0	0	0	0	0	0	0	0	0	0	0	0	0	0	0	0	0	0	0	0	0	0	0	0
>c12898	Otu03966	Unclassified	TTAAGTTCAGCGGGTAGTCCTACCTGATTTGAGATCAGATCATAAAAATAGTGTCCAAGTCAATGGACTATTAGAAGCGGTTCATCTGCATTTCCCTTGGCCACCTGTTACAGTGTCCTCAGCGATAGATAACTTATCACGCTGAGTGGAACCAAGCATAACACTGAGATCCAGCTAATGAACGAAGAGGAGCAGGTGTGAAGCTGCAAAGACCTCCAATACCAAAGTAGAACCAATCGAGTTAACAAAAGGTCAAGCTTGAGAGTATTCACGACACTCAAACAGGCATACTCCTCGGAATACCAAGGAGTGCAAGATGCGTTCAAAGACTCGATGATTCACTGAATTCTGCAATTCACATTACGTTTCGCACGTTCGCTACGTTCTTCATCGATGACG…	KJ489351	SH218651.07FU	406	Fungi	p__Basidiomycota	c__Agaricomycetes	o__Cantharellales	f__Ceratobasidiaceae	g__unidentified	s__Ceratobasidiaceae_sp	2	308754 Ceratobasidiaceae_sp	3.67611e-145	0.94	98.5222	0	0	0	0	0	0	0	0	0	0	0	0	0	0	0	0	0	0	0	0	0	0	0	0	0	0	0	0	0	0	0
>c65157	Otu02676	Unclassified	TTAAGTTCAGCGGGTAGTCCTACCTGATTTGAGATCAAGATTCAAGTAATGCCTCATAAGAGACAGTCTACTATGTAGACAATTAGAAGCGGAACAATAGTTTCTCAGCGACAGCATAGATAAGAATTATTATCAAACCGAAGCTGGTCTAACAAGTCCTGCTAATACATTTAAAAGGAGCTGACAATAACGCCAGCAAACCTTCAAAATCCAAGCGCATACAGTTAATAAAGACTATAGCGTTGAGAGATTAATGATACTCAAACAGGCATACCTTTCGGAATACCAAAAGGTGCAATGTGCGTTCAAAGATTCGATGATTCACTGAATTCTGCAATTCACATTACATATCGCAATTCGCTGCGTTCTTCATCGTTGACGAGTCTAG	FJ197943	SH461431.07FU	388	Fungi	p__Basidiomycota	c__Agaricomycetes	o__Agaricales	f__Clavariaceae	g__unidentified	s__Clavariaceae_sp	5	328285 Clavariaceae_sp	1.68484e-150	0.97	98.4536	0	0	0	0	0	0	0	0	0	0	0	0	0	0	0	0	0	0	0	0	0	0	0	0	0	0	0	0	0	0	0
>c15232	Otu02785	Unclassified	TTAAGTTCAGCGGGTAGTCCTACCTGATTTGAGGTCAAGTGTCAAATTGGTTATGCCTTCAAGAAGACAGTCCCACATGGGACAATTGGAAGCTGAAATATGTTAGGTATCTTTCACTAGCGACAGCAGTACAGATAAAGTAGTTTATCAAACTGAAGCCAGTTTTGCCTATCATTTCTGCTAATAAATTTAAAAGGAGCTGACTTGAAAAAGCCAGCAAGCCTTCAACATCCAAGCAACAGAGCAGGTTGTGAAACCTGTCTGGGTTGAGATATTAATGACACTCAAACAGGCATACCCTCCGGAATACCAGAGGGTGCAATGTGCGTTCAAAGATTCGATGATTCACTGAATTCTGCAATTCACATTACATATCGCAATTCTCTGCGTTCTTCATCG…	FJ552756	SH197585.07FU	412	Fungi	p__Basidiomycota	c__Agaricomycetes	o__Agaricales	f__Clavariaceae	g__unidentified	s__Clavariaceae_sp	2	300094 Clavariaceae_sp	1.20691e-164	0.98	98.5437	0	0	0	0	0	0	0	0	0	0	0	0	0	0	0	0	0	0	0	0	0	0	0	0	0	0	0	0	0	0	0
>d37921	Otu03908	Unclassified	TTAAGTTCAGCGGGTAGTCCTACCTGATTTGAGGTCAAGTGTCAAGTTGGTTATGCCTTCAAGAAGACAGTCCCACATGGGACAATTGGAAGCTGAAATATGTTAGGTATCTTTCACTAGCGACAGCAGTACAGATAAAGTAGTTTATCAAACTGAAGCCAGTTTTGCCTATCATTTCTGCTAATAAATTTAAAAGGAGCTGACTTGAAAAAAGCCAGCAAGCCTTCAACATCCAATCAACAGAGCAGGTTGTGAAACCTGTCTGGGTTGAGATATTAATGACACTCAAACAGGCATACCCTCCGGAATACCAGAGGGTGCAATGTGCGTTCAAAGATTCGATGATTCACTGAATTCTGCAATTCACATTACATATCGCAATTCGCTGCGTTCTTCATC…	FJ552756	SH197585.07FU	413	Fungi	p__Basidiomycota	c__Agaricomycetes	o__Agaricales	f__Clavariaceae	g__unidentified	s__Clavariaceae_sp	2	300094 Clavariaceae_sp	3.35646e-164	0.98	98.5472	0	0	0	0	0	0	0	0	0	0	0	0	0	0	0	0	0	0	0	0	0	0	0	0	0	0	0	0	0	0	0
>b1206	Otu01288	Unclassified	TTAAGTTCAGCGGGTAGTCCCGCCTGATTCGAGGTCAAAAGGTTGAAAAGTTCGTCAGCCCCGAAAAGCTTCGGAGAATTAGAAGCAACTCTAGATGAGTCCTGGCCACCCTCCCGAAAGAAGATGTCCTCAACGGTCATGAGTAATTATCACGCTGAGTAGAACCAAATCCCACAACAAGAGTCAGCTAATACATTTAAGACCAGCCGCTGCCAACTGAATGGCAATGGCAAGAGTCCAAATCCAAACTAAGATGACAATAAAGCATCTAGCTTGAGAACTTCACGACACTCGAACAGGCGTGCTCCTCGGAATACCAAGGAGCGCAAGGTGCGTTCAAAGATTCGATGATTCACTGAATTCTGCAATTCACATTACTTATCGCAATTCGCTGCGTTC…	HQ022108	SH011396.07FU	419	Fungi	p__Basidiomycota	c__Agaricomycetes	o__Cantharellales	f__Clavulinaceae	g__Clavulina	s__Clavulina_sp	828	316777 Clavulina_sp	2.16526e-104	0.84	98.568	0	0	0	0	0	0	0	0	0	0	0	0	0	0	0	0	0	0	0	0	0	0	0	0	0	0	0	0	0	0	0
>b1993	Otu01296	Unclassified	TTAAGTTCAGCGGGTAGTCCCGCCTGATTCGAGGTCAAAAGGTTGAAAAGTTCGTCAGCCCGAAAGCTTCGGAGGATTAGAAGCAACTCTAGATGAGTTCTGGCCACCCTCCCGAAAGAAGATGTCCTCAACGGTCATGAGTAATTATCACGCTGAGTAGAACCAAATCCCACAACAAGAGCCAGCTAATACATTTAAGACCAGCCGCTACCAACTAAATGGCAATGGCAAGAGTCCAAATCCAAACTAAGATGACAATAAAGCCATCTAGCTTGAGAACTTCACGACACTCGAACAGGCGTGCTCCTCGGAATACCAAGGAGCGCAAGGTGCGTTCAAAGATTCGATGATTCACTGAATTCTGCAATTCACATTACTTATCGCAATTCGCTGCGTTCT…	HQ022108	SH011396.07FU	418	Fungi	p__Basidiomycota	c__Agaricomycetes	o__Cantharellales	f__Clavulinaceae	g__Clavulina	s__Clavulina_sp	694	316777 Clavulina_sp	1.01243e-105	0.85	98.5646	0	0	0	0	0	0	0	0	0	0	0	0	0	0	0	0	0	0	0	0	0	0	0	0	0	0	0	0	0	0	0
>a112814	Otu02124	Unclassified	TTAAGTTCAGCGGGTAGTCCCACCTGATTCGAGGTCAAAGGTTGAAAAGTGAATAGGAAAGTTAGACCAAGGTCCAACAAACCCATGCAAATTAGAAGCAGTCCGAGGCAGACTTGGCCATCCCGAAAGATGTCCTCAACGGTCATGATAATTATCACGTTGAGTAGAACCAATCCCACAGCAAGGGCCAGCTAATGCTTTTAAGACCAGCCGTTTCAAAGGAGAAGACGGCAGAGTCCAAAACCAAACTAAGATGACAATAAAGCATCCAGCTTGAGAGTTTCACGACACTCGAACAGGCGTGCTCCCCGGAATACCAGGGAGCGCAAGGTGCGTTCAAAGATTCGATGATTCACTGAATTCTGCAATTCACATTACTTATCGCATTTCGCTGCGTTC…	HQ022108	SH011396.07FU	419	Fungi	p__Basidiomycota	c__Agaricomycetes	o__Cantharellales	f__Clavulinaceae	g__Clavulina	s__Clavulina_sp	8	316777 Clavulina_sp	5.37446e-123	0.88	98.568	0	0	0	0	0	0	0	0	0	0	0	0	0	0	0	0	0	0	0	0	0	0	0	0	0	0	0	0	0	0	0
>b1552	Otu04344	Unclassified	TTAAGTTCAGCGGGTAGTCCCGCCTGATTCGAGGTCAAAAGGTTGAAAAGTTCGTCAGCCCCGAAAAGCTTCGGAGAATTAGAAGCAACTCAAGATGAGTCCTGGCCACCCCCACAACAAGAGTCAGCTAATACATTTAAGACCAGCCGCTGCCAACTGAATGGCAATGGCAAGAGTCCAAATCCAAACTAAGATGACAATAAAGCATCTAGCTTGAGAACTTCACGACACTCGAACAGGCGTGCTCCTCGGAATACCAAGGAGCGCAAGGTGCGTTCAAAGATTCGATGATTCACTGAATTCTGCAATTCACATTACTTATCGCAATTCGCTACGTTCTTCATCGATGACGAGTCTAG	JX507640	SH191593.07FU	359	Fungi	p__Basidiomycota	c__Agaricomycetes	o__Cantharellales	f__Clavulinaceae	g__Clavulina	s__Clavulina_sp	2	297309 Clavulina_sp	2.40655e-74	0.89	69.0808	0	0	0	0	0	0	0	0	0	0	0	0	0	0	0	0	0	0	0	0	0	0	0	0	0	0	0	0	0	0	0
>b5369	Otu02546	Unclassified	TTAAGTTCAGCGGGTAGTCCTACCTGATTTGAGGTCAAATTGTCATATATTGTCCGAATGAACAGACGGTTATAAGCAGTGCTAAAAACGGCGAATAGTCCACGGCGTAGATAATTATCACACCAATAGACAGGTTCACACAAGGCAACCAGCTAATGTATTTCAGGGGAGCTAATTTCATTACAGAAACCTGCATACCCCCACATCCAAGCCATTTGCTAACCAAAAAAGTAAGCAAAGGTTGAGAATTTAATGACACTCAAACAGGCATGCTCCTCGGAATACCAAGGAGCGCAAGGTGCGTTCAAAGATTCGATGATTCACTGAATTCTGCAATTCACATTACTTATCGCATTTCGCTGCGTTCTTCATCGTTGACGAGTCTAG	HQ022193	SH018233.07FU	387	Fungi	p__Basidiomycota	c__Agaricomycetes	o__Corticiales	f__Corticiaceae	g__unidentified	s__Corticiaceae_sp	2	319977 uncultured_Hyphodontia	3.80658e-157	0.99	98.4496	0	0	0	0	0	0	0	0	0	0	0	0	0	0	0	0	0	0	0	0	0	0	0	0	0	0	0	0	0	0	0
>a48721	Otu01650	Unclassified	TTAAGTTCAGCGGGTAGTCCTACCTGATTTGAGGTCACATTAATGAAAAAACTGTCCAAGTCAATGGACTGTTAGAAGCTGAACTGCCTCACGTCAATAGCGTAGATAATTATCACACCAATGAACGGTCAACAAATTGTTCCGCTAATACATTTTAGGGGAGCTGATCTCTTTTAAAAGACCAGCAAAAAGACCCCCACATCCAATACTCAACAAGCAAAGCTGAAGAGATTGATATATTAATGACACTCAAACAGGCATGCTCCTCGGAATACCAAGGAGCGCAAGGTGCGTTCAAAGATTCGATGATTCACTGAATTCTGCAATTCACATTACTTATCGCATTTCGCTGCGTTCTTCATCGGTGACGAGTCTAG	UDB014584	SH222459.07FU	377	Fungi	p__Basidiomycota	c__Agaricomycetes	o__Agaricales	f__Cortinariaceae	g__Cortinarius	s__Cortinarius_sp	23	310624 Cortinarius_sp	9.92963e-153	0.99	98.4085	0	0	0	0	0	0	0	0	0	0	0	0	0	0	0	0	0	0	0	0	0	0	0	0	0	0	0	0	0	0	0
>c72194	Otu02302	Unclassified	TTAAGTTCAGCGGGTAGTCCTACCTGATTTGAGGTCACATTAATGAAAAACTGTCCAAGTCAATGGACTGTTAGAAGCTGAACTGCCTCACGTCAATAGCGTAGATAATTATCACACTAATGAACGGTCAACAAATTGTTCCGCTAATACATTTTAGGGGAGCTGACCTCTTGAAAAGACCAGCAAAAAGGCCCCCCACATCCAACACTCAACAAGCAAAAGCTGAAGAGGTTGATATATTAATGACACTCAAACAGGCATGCTCCTCGGAATACCAAGGAGCGCAAGGTGCGTTCAAAGATTCGATGATTCACTGAATTCTGCAATTCACATTACTTATCGCATTTCGCTGCGTTCTTCATCGTTGACGAGTCTAG	UDB011265	SH222378.07FU	377	Fungi	p__Basidiomycota	c__Agaricomycetes	o__Agaricales	f__Cortinariaceae	g__Cortinarius	s__Cortinarius_sp	6	310544 Cortinarius_xanthocephalus	9.92963e-153	0.99	98.4085	0	0	0	0	0	0	0	0	0	0	0	0	0	0	0	0	0	0	0	0	0	0	0	0	0	0	0	0	0	0	0
>a1643	Otu02009	Unclassified	TTAAGTTCAGCGGGTAGTCCTACCTGATTTGAGGTCACATTAATGAAAATTTGTCCAAGTCAATGGACTGTTAGAAGCTGAACCTGCTTCACGTCAATAGCGTAGATAGTTATCACACCAATGAACGGTCAACAAATTGTTCCGCTAATGCATTTCAGGGGAGCCGAACTCAGTAAGAGAGAGACCAGCAAAAGACCCCCACATCCAACACTGAACAAGCAAAAACTTGAGGAGGTTGATATATTAATGACACTCAAACAGGCATGCTCCTCGGAATACCAAGGGGCGCAAGGTGCGTTCAAAGATTCGATGATTCACTGAATTCTGCAATTCACATTACTTATCGCATTTCGCTGCGTTCTTCATCGTTGACGAGTCTAG	JX679147	SH033523.07FU	381	Fungi	p__Basidiomycota	c__Agaricomycetes	o__Agaricales	f__Cortinariaceae	g__Cortinarius	s__Cortinarius_sp	5	327307 Cortinarius_aff_pallidus_4_FS_2012	7.50117e-148	0.98	98.4252	0	0	0	0	0	0	0	0	0	0	0	0	0	0	0	0	0	0	0	0	0	0	0	0	0	0	0	0	0	0	0
>d82490	Otu04329	Unclassified	TTAAGTTCAGCGGGTAGTCCTACCTGATTTGAGGTCACATTAATGATGAGCTTGTCCAAGGACTGTTAGAAAGCCAAACTGCCCTTCACATTCAATAGCGTAGATAGTTTATCACACCAATGAACAGGGTTGTTCTGCTAATGTATTTCAGGAGAGCCAAGACCTTTTTAAGAGGCCAGCAAACCCCCACATCCAAACCACTCAAAAAGAGAAGGTTGATATATTAATGACACTCAAACAGGCATGCTCCTCGGAATACCAAGGAGCGCAAGGTGCGTTCAAAGATTCGATGATTCACTGAATTCTGCAATTCACATTACTTATCGCATTTCGCTGCGTTCTTCATCGGTGACGAGTCTAG	UDB001230	SH188470.07FU	361	Fungi	p__Basidiomycota	c__Agaricomycetes	o__Agaricales	f__Cortinariaceae	g__Cortinarius	s__Cortinarius_sp	2	295868 Cortinarius_diasemospermus_var._leptospermus	6.86029e-144	0.99	98.338	0	0	0	0	0	0	0	0	0	0	0	0	0	0	0	0	0	0	0	0	0	0	0	0	0	0	0	0	0	0	0
>b71807	Otu02255	Unclassified	TTAAGTTCAGCGGGTAGTCCTACCTGATCTGAGGTCAAAATTATCATAAATTTTGTCAGAGACAATTTGAAGCAGATTCCCACTCAAAAGGCAAACATACTGCAGCGTAGATAAGTTATCACACCAACAGATGGTCTGCAGGGGCATTCTGGCTAATAAATTTTAGAGGAGCAGGTTTAAAAAATCTGCAAGCCCCCATATCCAAATCAGCCTTCAACAAAAGTTGAGGTGATTGAGAATTTAATGACACTCAAACAGGCATGCTCCTCAGAATACTAAGGAGCGCAAGGTGCGTTCAAAAATTCGATGATTCACTGAATTCTGCAATTCACATTACTTATCGCATTTCGCTGCGTTCTTCATCGTTGACGAGTCTAG	UDB004047	SH220026.07FU	378	Fungi	p__Basidiomycota	c__Agaricomycetes	o__Agaricales	f__Cortinariaceae	g__Descolea	s__Descolea_sp	4	309391 Descolea_sp	5.94688e-85	0.81	98.4127	0	0	0	0	0	0	0	0	0	0	0	0	0	0	0	0	0	0	0	0	0	0	0	0	0	0	0	0	0	0	0
>b124953	Otu01597	Unclassified	TTAAGTTCAGCGGGTAGTCCTACCTGATTTGAGGTCAAAATTGTCAAGAATTGTCTGAATAGACTATTAGAAGCAGTAAAACCCTCCCAATGAAGGAGCCAATTGTCCGTGGTATAGATAATTATCATACCAAAGATAATTAGCAAAGTTTCTGCTAATACATTTAAGAAGAGCTGATTTCTGGGAAACCAGCAACCTCCACATCCAAGCCTGATCTAGCTCTTTCAAGTTAGACAGGTTGAGAATTTCACGACACTCAAACAGGCATGCTCCTCGGAATACCAAGGAGCGCAAGGTGCGTTCAAAGATTCGATGATTCACTGAATTCTGCAATTCACATTACTTATCGCATTTCGCTGCGTTCTTCATCGTTGACGAGTCTAG	UDB015475	SH218235.07FU	384	Fungi	p__Basidiomycota	c__Agaricomycetes	o__Agaricales	f__Entolomataceae	g__Entoloma	s__Entoloma_pleopodium	44	308591 Entoloma_pleopodium	8.04447e-156	0.99	98.4375	0	0	0	0	0	0	0	0	0	0	0	0	0	0	0	0	0	0	0	0	0	0	0	0	0	0	0	0	0	0	0
>a18666	Otu01316	Unclassified	TTAAGTTCAGCGGGTAGTCCTACCTGATTTGAGGTCAAAAGTTATCAGATTGTCTTTAAAAAGACTATTAGAAGCAAGACCTCTCCCGTGAGGGACACTGGTTATCAATGATATAGATAATTATCATACCAATGATGAGCAGCAAAGATCTTCGCTAATATATTTAAGAAGAGCTGATTCATAGTGAGCCAGCAACTTCCAAAATCCAAGCCTAACCAGTTCAAAAAACTAGAGAGGTTGAGAATTTCATGACACTCAAACAGGCATGCTCCTCGGAATACCAAGGAGCGCAAGGTGCGTTCAAAGATTCGATGATTCACTGAATTCTGCAATTCACATTACTTATCGCATTTCGCTGCGTTCTTCATCGTTGACGAGTCTAG	UDB011846	SH221917.07FU	383	Fungi	p__Basidiomycota	c__Agaricomycetes	o__Agaricales	f__Entolomataceae	g__Entoloma	s__Entoloma_sericeum	461	310297 Entoloma_sericeum	2.22404e-155	0.99	98.4334	0	0	0	0	0	0	0	0	0	0	0	0	0	0	0	0	0	0	0	0	0	0	0	0	0	0	0	0	0	0	0
>a38342	Otu01570	Unclassified	TTAAGTTCAGCGGGTAATCTTATCTGATTTGAGATCAATACATCGAAAGCTTTCATTTTTCAACAAAAGCTGCTTTAGAAGCGGCAAGCCTTTATAAAACCCCAAAGTACACATTTGATTTCAGCGGCACAAGTAATTATTATACCAAAGAAAATCAATTTGGACTTTCGCTAATCAATTTGAGGAGAGCAGACTAAGCGCCTGCAAAAGTCTCCCACAATCCAAATCCTAAACCCAAGACACTTTAACAAAAAAGAGTCACAGATCGAGGAATTGAGAATTTTATGATACTCAAACAGACATGCTTCTTGGAAGAAAGGTCCCAAAAAGCGCAAGATGCGTTCAAAAATTCGATGATTCACGGAGTTCTGCAATTCACACTACTTATCGCATTTCGCT…	KC678996	SH221754.07FU	425	Fungi	p__Basidiomycota	c__Agaricomycetes	o__Agaricales	f__Entolomataceae	g__Entoloma	s__Entoloma_sp	60	310217 Entoloma_crassicystidiatum	5.51529e-57	0.79	72	0	0	0	0	0	0	0	0	0	0	0	0	0	0	0	0	0	0	0	0	0	0	0	0	0	0	0	0	0	0	0
>d3421	Otu02245	Unclassified	TTAAGTTCAGCGGGTAGTCTTATCTGATTTGAGGTCAAATTGTCAGGTTTGTCTTGAACAGACTGTTGGAAGCGCGAGCCCTCATTCCACGAATGAAAGTTTGGTTTCAATTGGTACAAGAATTTTATTATACCAAAAAGAGCACCAAATCAGACTCTTGCTAATATATTTGAGAAGAGCAGACTTTCAAGCCTGCAAACTTCCACAATCCAAAATCAAACCTGAACTCATCACAAAGTTCAAGGGTGAGATTCGAGAATTTCATGACACTCAAACAGACATGCTTTTTGGAATGGATACCAAAAAGCGCAAGGTGCGTTCAAAGATTCGATGATTCACTGAATTCTGCAATTCACACTACTTATCGCATTTCGCTGCGTTCTTCATCGATGACGAGTC…	JQ320108	SH461060.07FU	402	Fungi	p__Basidiomycota	c__Agaricomycetes	o__Agaricales	f__Entolomataceae	g__Entoloma	s__Entoloma_sp	4	328237 Entoloma_yunnanense	1.53938e-99	0.86	89.3035	0	0	0	0	0	0	0	0	0	0	0	0	0	0	0	0	0	0	0	0	0	0	0	0	0	0	0	0	0	0	0
>a85017	Otu02356	Unclassified	TTAAGTTCAGCGGGTAGTCCTACCTGATTTGAGGTCAAAATGTCATATAGTTGTCTTTGTCAAGACGGTTAGTAGCAGTCATCTTCCCCTTTGAATACAGGGTAAACCAAGTCTACATAGTATAGATAATTATCATACTAATAGGATGATCGGTCAAAGATCCCGCTAATATATTTAAGAAGAGCGGATTTTCATTAATAAATAAAGAAAAGCCCGCAAACTCCCCATAATCCAAGCCTCACTTTACTCGTGAAAGTAAATGAGGTTGAGAATGTTATGACTCTCAAACAGGCATGCTCCTCGGAATACCAAGGGGCGCAAGGTGCGTTCAAAGATTCGATGATTCACTGAATTCTGCAATTCACATTACTTATCGCATTTCGCTGCGTTCTTCATCGT…	KC898436	SH218175.07FU	411	Fungi	p__Basidiomycota	c__Agaricomycetes	o__Agaricales	f__Entolomataceae	g__Entoloma	s__Entoloma_sp	2	308556 Entoloma_sublaevisporum	2.46411e-124	0.89	98.5401	0	0	0	0	0	0	0	0	0	0	0	0	0	0	0	0	0	0	0	0	0	0	0	0	0	0	0	0	0	0	0
>d21346	Otu03057	Unclassified	TTAAGTTCAGCGGGTAGTCCTACCTGATTTGAGGTCAAATTGTCAAGGTTGTCCAGATGGACTGTTAGAAGCAAAACCATCCCCATAGGAGCTACTTTTCAATAGTATAGATAATTATCATACTAAAGATAGTCAGCAAAGGTTTTGCTAATGCATTTAAGAAGAGCTGGTTTCTGATAAAACCAGCAACTTCCACAATCCAAGCCTAACCAGCTAGATAAAGCTAGAGAGGTTGAGAATTTCATGACACTCAAACAGACATGCTCCTCGGAATACCAAGGAGCGCAAGGTGCGTTCAAAGATTCGATGATTCACTGAATTCTGCAATTCACATTACTTATCGCATTTCGCTGCGTTCTTCATCGGTGACGAGTCTAG	AB520849	SH221919.07FU	378	Fungi	p__Basidiomycota	c__Agaricomycetes	o__Agaricales	f__Entolomataceae	g__Entoloma	s__Entoloma_sp	2	310299 Entoloma_sp_SAPA:1161	2.59968e-144	0.98	95.5026	0	0	0	0	0	0	0	0	0	0	0	0	0	0	0	0	0	0	0	0	0	0	0	0	0	0	0	0	0	0	0
>b120631	Otu04201	Unclassified	TTAAGTTCAGCGGGTAGTCCTACCTGATTTGAGGTCAAATTGTCAAGTTGTCAAACAACTATTAGAAGCAAAACCTCTCCATAAAGGAAGCTGGTTATCAATGATATAGATAATTATCATACCAAAGATGGTCAGCAAAGGTCTTTGCTAATATATTTAAGAAGAGCTGATTCGTGAGAAGCCAGCAACTTCCAAGATCCAAGCCTAACCAGCTGAAAAAGCTAGAAAGGTTGAGAAATTCATGACACTCAAACAGGCATGCTCCTCGGAATACCAAGGAGCGCAAGGTGCGTTCAAAGATTCGATGATTCACTTAATTCTGCAATTCACATTACTTATCGCATTTCGCTACGTTCTTCATCGATGACGAGTC	UDB011804	SH221925.07FU	373	Fungi	p__Basidiomycota	c__Agaricomycetes	o__Agaricales	f__Entolomataceae	g__Entoloma	s__Entoloma_sp	2	310304 Entoloma_infula	2.49459e-140	0.95	99.1957	0	0	0	0	0	0	0	0	0	0	0	0	0	0	0	0	0	0	0	0	0	0	0	0	0	0	0	0	0	0	0
>b81136	Otu03072	Unclassified	TTAAGTTCAGCGGGTAATCCTACCTGATTTGAGGTCAAAGGTCAAAGTTATTGTCCCGTGAAGGACGATTGGAAGCCGAATAATATGCTTCACAGTAACGGCGTAGACATTTTATCACACCGATAAGCTGATCCACAAAAGGTTCGAGCTAATGCATTCAAGAGGAGCCGATCACAGGTACCGGCAATAAACCTCCAAGTCCAAGCTCTATTCACAAAAGCAAATAGAGTTGAGAATTCCATGACACTCAAACAGGCATGCTCCTCGGAATACCAAGGAGCGCAAGGTGCGTTCAAAGATTCGATGATTCACTGAATTCTGCAATTCACATTACTTATCGCATTTCGCTGCGTTCTTCATCGTTGACGAGTCTAG	UDB011618	SH207630.07FU	375	Fungi	p__Basidiomycota	c__Agaricomycetes	o__Polyporales	f__Fomitopsidaceae	g__Fomitopsis	s__Fomitopsis_pinicola	2	304162 Fomitopsis_pinicola	7.62516e-152	0.99	98.4	0	0	0	0	0	0	0	0	0	0	0	0	0	0	0	0	0	0	0	0	0	0	0	0	0	0	0	0	0	0	0
>d9576	Otu00004	Unclassified	TTAAGTTCAGCGGGTAATCCTACCTGATTCGAGGTCAAAGTTGAAAAGTAAGGGTGCTTTGGGAGCCCGGTGGTTACTCTCGGACCGTCGTGCATATAAAAGATTTATTACACTCAAGCCGATCGTGTTCGCCATGGCTAATGCATTTCAGAGCAGTCGACTCTCGCCGACAGGCTCCAACTCCAAGACTCCGGACGCAAATCCGCAGTCTTGATAACTTCACGACACTCGAACAGGCATACTCTCCGGAATACCAGAGAGTGCAAGATGCGTTCAAAGATTCGATGATTCACTGAATTCTGCAATTCACATTACTTATCGCAATTCGCTGCGTTCTTCATCGTTGACGAGTCTAG	JQ081388	SH216699.07FU	356	Fungi	p__unidentified	c__Agaricomycetes	o__unidentified	f__unidentified	g__unidentified	s__Fungi_sp	206	307922 Agaricomycetes_sp	3.60563e-95	0.85	98.3146	0	0	0	0	0	0	0	0	0	0	0	0	0	0	0	0	0	0	0	0	0	0	0	0	0	0	0	0	0	0	0
>c125938	Otu00006	Unclassified	TTAAGTTCAGCGGGTAATCCTACCTGATTCGAGGTCAAAGGTGAAAAAGTAAGGGTGCTTTGTGAGCCCGGTGTGTACTCTCGGACCGTCGTGCATATAAAAGATTTATTACACTCAAGCCGATCGTGTTCGCCATGGCTAATGCATTTCAGAGCAGTCGACTCTCGCCGACAGGCTCCAACTCCAAGACTCCGGACGCAAATCCAAAGTCTTGAGAACTTCACGACACTCGAACAGGCATACTCTCCGGAATACCAGAGAGTGCAAGATGCGTTCAAAGATTCGATGATTCACTGAATTCTGCAATTCACATTACTTATCGCAATTCGCTGCGTTCTTCATCGATGACGAGTCTAG	JQ081388	SH216699.07FU	357	Fungi	p__unidentified	c__Agaricomycetes	o__unidentified	f__unidentified	g__unidentified	s__Fungi_sp	75	307922 Agaricomycetes_sp	1.00325e-94	0.85	98.3193	0	0	0	0	0	0	0	0	0	0	0	0	0	0	0	0	0	0	0	0	0	0	0	0	0	0	0	0	0	0	0
>d18584	Otu01421	Unclassified	TTAAGTTCAGCGGGTAATCCTACCTGATTCGAGGTCAAAGGTGAAAAAGTAAGGGTGCTTTGTGAGCCCGGTGTGTACTCTCGGACCGTCGTGCATATAAAAGATTTATTACACTCAAGCCGATCGTGTTCGCCATGGCTAATGCATTTCAGAGCAGTCGACTCTCGCCGACAGGCTCCAACTCCAAGACTCCGGACGCAAATCCAAAGTCTTGAGAACTTCACGACGCTCGAACAGGCATACTCACCGGAATACCAGAGAGTGCAAGATGCGTTCAAAGATTCGATGATTCACTGAATTCTGCAATTCACATTACTTATCGCAATTCGCTGCGTTCTTCATCGGTGACGAGTCTAG	JQ081388	SH216699.07FU	357	Fungi	p__unidentified	c__Agaricomycetes	o__unidentified	f__unidentified	g__unidentified	s__Fungi_sp	6	307922 Agaricomycetes_sp	4.56345e-92	0.84	98.3193	0	0	0	0	0	0	0	0	0	0	0	0	0	0	0	0	0	0	0	0	0	0	0	0	0	0	0	0	0	0	0
>d111062	Otu01401	Unclassified	TTAAGTTCAGCGGGTAATCCTACCTGATTCGAGGTCAAAGTTGAAAAGTAAGGGTGCTTTGGGAGCCCGGTGGTTACTCTCGGACCGTCGTGCATATAAAAGATTTATTACACTCAAGCCGATCGTGTTCGCCATGGCTAATGCATTTCAGAGCAGTCGACTCTCGCCGACAGGCTCCAACTCCAAGACTCCGGACGCAAATCCGCAGTCTTGATAACTTCACGGCACTCGAACAGGCATACTCTCCGGAATACCAGAGAGTGCAAGATGCGTTCAAAGATTCGATGATTCACTGAATTCTGCAATTCACATTACTTATCGCAATTCGCTGCGTTCTTCATCGGTGACGAGTCTAG	JQ081388	SH216699.07FU	356	Fungi	p__unidentified	c__Agaricomycetes	o__unidentified	f__unidentified	g__unidentified	s__Fungi_sp	5	307922 Agaricomycetes_sp	2.77295e-94	0.84	98.3146	0	0	0	0	0	0	0	0	0	0	0	0	0	0	0	0	0	0	0	0	0	0	0	0	0	0	0	0	0	0	0
>a71528	Otu04086	Unclassified	TTAAGTTCAGCGGGTAGTCCTACCTGATTTGAGGTCAAATTGTCATGTATTGTCTGAGTAAACAGACGGTTGGGAGCAGCGCAAACCCATATGATTGTAGATGTCCACGGCGTAGATAATTATCACACCAATAGACAGTCCACGTGGGGCACCGGCTAATTCATTTAAGGGGAGCTGACATTCTGTGAAGCCAGCAAAATAAACCCCCATATCCAAGCCATCATCAGCAAAAGCTGATAATAGTTGAGAATTTAATGACACTCAAACAGGCATGCTCCTCGGAATACCAAGGAGCGCAAGGTGCGTTCAAAGATTCGATGATTCACTGAATTCTGCAATTCACATTACTTATCGCATTTCGCTGCGTTCTTCATCGTTGACGAGTCTAG	AM711491	SH030754.07FU	389	Fungi	p__Basidiomycota	c__Agaricomycetes	o__Agaricales	f__Hebelomataceae	g__unidentified	s__Hebelomataceae_sp	2	326191 Hebelomataceae_sp	1.742e-154	0.98	98.4576	0	0	0	0	0	0	0	0	0	0	0	0	0	0	0	0	0	0	0	0	0	0	0	0	0	0	0	0	0	0	0
>a69012	Otu03920	Unclassified	TTAAGTTCAGCGGGTAATCCTACCTGATTTGAGATTAATTTGGTCAAAGCATGGGGGAGGCAAAGCCCCCAATGGGTCTGTGAGCGAGCAGAACTTTCCACCTAAGCACAACACACTCGAGCATGAAAGAGACTTATCAATGCTGGAGAGGCGTGATGGCACGAGGATGTCACATCGCTAATGCATTTCAGAGGAGCTGGGCTTCTAAAAAAAGGCCAGCACGCTCCAATTCCAAAAGAAGAAGCCACAAAAAGCTTCCCCCTCTTGAGGGTTTCAATGACACTCAAACAGGCATGCCCCTCGGAATACCGAGAGGCGCAAGGTGCGTTCAAAGATTCGATGATTCACGGAATTCTGCAATTCACATTACGTATCGCATTTCGCTGCGTTCTTCATCGA…	UDB018037	SH176828.07FU	411	Fungi	p__Basidiomycota	c__Agaricomycetes	o__Agaricales	f__Hygrophoraceae	g__Hygrocybe	s__Hygrocybe_conica	2	290756 Hygrocybe_conica	8.71073e-156	0.97	98.5401	0	0	0	0	0	0	0	0	0	0	0	0	0	0	0	0	0	0	0	0	0	0	0	0	0	0	0	0	0	0	0
>a60259	Otu02853	Unclassified	TTAAGTTCAGCGGGTAATCCTACCTGATTTGAGGTCAAGTTGGTCATTCGGTTGGAAAGCAGCAGCAGCACGACACCAAGGCACTGATAGTTATCACACCTGTGGTGGTCTTGCCCAGACGCCAGCTAATACGTTTCAGAGGAGCAGACCGTAGGCCTGCACTCCCCCCATTTCCAAGCCACATCCAGAAGCAAATCTGGAGCGGTTGAGAAGTTTTAAATGACACTCAAACAGGCATGCTCCTCGGAATACCAAGGAGCGCAAGATGCGTTCAAAGATTCGATGATTCACTGAATTCTGCAATTCACATTACTTATCGCATTTCGCTGCGTTCTTCATCGATGACGAGTCTAG	AB218177	SH014382.07FU	354	Fungi	p__Basidiomycota	c__Agaricomycetes	o__Agaricales	f__Inocybaceae	g__Inocybe	s__Inocybe_sp	5	318108 Inocybe_sp	3.96412e-142	0.99	98.3051	0	0	0	0	0	0	0	0	0	0	5	0	0	0	0	0	0	0	0	0	0	0	0	0	0	0	0	0	0	0	0
>a112930	Otu01513	Unclassified	TTAAGTTCAGCGGGTAGTCCTACCTGATTTGAGGTCAAAAGGTTCAACTTGTCCAGTAACTTAGGACGGTTTGAAGCGGATACTAAACTCATAAAGAGCTGCAGCCACACACAAGCGTAGATAATTATCACACCAATGCGGATTGCAAACAGTTTCCACTAATGCATTTCAGAGGAGCCGACTCTAGAAGAGCCAGCAAAACCTCCACATCCAAGCTTCAAAAACAAAAGCTTTTGAAGTTGAGAATTTAATGACACTCAAACAGGCATGCCTCTCGGAATACCAAGAGGCGCAAGGTGCGTTCAAAGATTCGATGATTCACTGAATTCTGCAATTCACATTACTTATCGCATTTCGCTGCGTTCTTCATCGATGACGAGTCTAG	EF187911	SH190820.07FU	385	Fungi	p__Basidiomycota	c__Agaricomycetes	o__Agaricales	f__Marasmiaceae	g__Marasmius	s__Marasmius_oreades	108	296984 Marasmius_oreades	1.72095e-154	0.98	98.4416	0	0	0	0	0	0	0	0	0	0	0	0	0	0	0	0	0	0	0	0	0	0	0	0	0	0	0	0	0	0	0
>b92703	Otu02270	Unclassified	TTAAGTTCAGCGGGTAGTCCTACCTGATTTGAGGTCAAAATAGTCAAAGGTTGTCCAGCGACTTAGGACGGTTTGAAGCGAATACCATATACTCTCTCGCAGGTCAATCAGAACAGAAAGAGCAAGTTCATGCAGCTTTCCAAACGAACACCACAAGAGCTGTAGCCACGAATACAATGGCGCAGATAATTATCACACCAACGCGGACTACAAACAGGTTTCCACTAATGCATTTGAGAGGAGCTGACTCTAAAAAGCAAGCCAGCAAAAAAAGCCTCCACATCCAAGCCTCAGAAACAAAAAAGCTTTTGAGGTTGAGAATTAAATGACACTCAAACAGGCATGCCTCTCGGAATACCAAGAGGCGCAAGGTGCGTTCAAAGATTCGATGATTCACTG…	UDB015377	SH183163.07FU	460	Fungi	p__Basidiomycota	c__Agaricomycetes	o__Agaricales	f__Marasmiaceae	g__Marasmius	s__Marasmius_oreades	7	293484 Marasmius_oreades	0.0	0.99	98.6957	0	0	0	0	0	0	0	0	0	0	0	0	0	0	0	0	0	0	0	0	0	0	0	0	0	0	0	0	0	0	0
>d4594	Otu02295	Unclassified	TTAAGTTCGGCGGGTAGTCCTACCTGATTTGAGGTCAAAAGGTTCAAGTTGTCCAGTAACTTAGGACGGTTTGAAGCGGATACTAAACTCGTAAAGAGCTGCAGCCACACACAAGCGTAGATAATTATTACACCAATGCGGATTGCAAACAGTTTCCACTAATGCATTTCAGAGGAGCCGACTCTAGAAGAGCCAGCAAAGCCTCCACATCCAAGCTTCAAAAACAAAAGCTTTTGAAGTTGAGAATTTAATGACACTCAAACAGGCATGCCTCTCGGAATACCAAGAGGCGCAAGGTGCGTTCAAAGATTCGATGATTCACTGAATTCTGCAATTCACATTACTTATCGCATTTCGCTGCGTTCTTCATCGGTGACGAGTCTAG	EF187911	SH190820.07FU	385	Fungi	p__Basidiomycota	c__Agaricomycetes	o__Agaricales	f__Marasmiaceae	g__Marasmius	s__Marasmius_oreades	6	296984 Marasmius_oreades	1.72095e-154	0.98	98.4416	0	0	0	0	0	0	0	0	0	0	0	0	0	0	0	0	0	0	0	0	0	0	0	0	0	0	0	0	0	0	0
>a31907	Otu01390	Unclassified	TTAAGTTCAGCGGGTAATCCTACCTGATTTGAGGTCAAATGGTTCAAAATTGTCTACAATGTAGACGGTTTGAAGCAGACAATCCTGACTCAAGAGACAGAAAGAGCAAATTCATGCAACTCTCCACACCAAGACTGCAGTAAAACAGCTCGAAGATTCTAATGAGCATGCATTCAAAGCCATAGCGTAGATAATTATCACACTAAGGATGAACACAAACGGGTCCACTAATACTTTTCAAAGGAGCTGAACATTTAAAACGCCAGCAAGCCTTCACATCCAAGCTTCAAAAAGACAAAGCTTTTGAAGTTGAGAATTTAATGACACTCAAACAGGCATGCCTCTCAGAATACCAAGAGGCGCAAGGTGCGTTCAAAGATTCGATGATTCACTGAATTC…	JN943601	SH177160.07FU	455	Fungi	p__Basidiomycota	c__Agaricomycetes	o__Agaricales	f__Marasmiaceae	g__Marasmius	s__Marasmius_sp	241	290913 Marasmius_tricolor	0.0	0.98	98.6813	0	0	0	0	0	0	0	0	0	60	0	0	0	0	9	0	0	0	0	0	2	0	0	0	0	0	0	0	0	0	0
>b24856	Otu01512	Unclassified	TTAAGTTCAGCGGGTAGTCCTACCTGATTTGAGGTCAAAAAGTCAATAAATTGTCTTGCAATAAGACAGTTAGAAGCAGAACGACTTCACTATTGCAGGTTCATTGAAGCAGAAAGAGCACTATTCATGCAGCTTCCCAATCGAAACACCACAAAGCGTGCAGCACCATAAGTAGCGTAGATAATTATCACACTAATTGTGGACCACAAGCAGTCTCCACTAATGCATTTAAGAGGAGCCAACTAATGAAAGCCAGCAAAAACCTCCACATCCAAGCTTCAACAGTCAAGAAAACTATTGAAGTTGAGAATTTAGTGACACTCAAACAGGCATGCCTCTCGGAATACCAAGAGGCGCAAGGTGCGTTCAAAGATTCGATGATTCACTGAATTCTGCAAT…	KC415763	SH010950.07FU	449	Fungi	p__Basidiomycota	c__Agaricomycetes	o__Agaricales	f__Marasmiaceae	g__Marasmius	s__Marasmius_sp	94	316581 Marasmius_rotalis	8.37768e-171	0.96	98.6637	0	0	0	0	0	0	0	0	0	0	0	0	0	0	0	0	0	0	0	0	0	0	0	0	0	0	0	0	0	0	0
>a36055	Otu01343	Unclassified	TTAAGTTCAGCGGGTAGTCCCACCTGATTCGAGGTCAGATTTGAAAAGTGGTTAATCCAATAAAGAATTAAAGCCAGATTAGAAGCAGTCCATTGAATTTACTATGGCCATTCCTCGTGAAAGGAATGTCCTCAACGATCAGATAATTATCACGTTGAGTAGAACCAATTCGTTCTAGTACCAGCTAATACTTTTAAAACCAGCCGTTATAACACGGCAAAGTTCAAATCCAAAACAACAATCAGGTTTTAAGCCAATTGCGTTTTGAGAGCTTCATAACACTCGAACAGGCGTACTCCTCGGAATACCAAGGAGTGCAAGGTGCGTTCAAAGATTCGATGATTCACTGAATTCTGCAATTCACATTACTTATCGCATTTCGCTGCGTTCTTCATCGTT…	DQ421079	SH201127.07FU	410	Fungi	p__Basidiomycota	c__Agaricomycetes	o__Cantharellales	f__Incertae_sedis	g__Minimedusa	s__Minimedusa_sp	273	301532 Minimedusa_sp	2.63835e-167	0.99	98.5366	0	0	0	0	0	0	0	0	0	0	0	0	0	0	0	0	0	0	0	0	0	0	0	0	0	0	0	0	0	0	0
>c120404	Otu01653	Unclassified	TTAAGTTCAGCGGGTAGTCCCACCTGATTCGAGGTCAGATTTGAAAAGTGGTTAATCCAATAAAGAATTAAAGTCAGATTAGAAGCAGTCCATTGAATTTACTATGGCCATTCCTCGTGAAAGGAATGTCCTCAACGATCAGATAATTATCACGTTGAGTAGAACCAATTCGTTCTAGTACCAGCTAATACTTTTAAAACCAGCCGTTATAACACGGCAAAGTTCAAATCCAAAACAACAATCAGGTTTTAAGCCAATTGCGTTTTGAGAGCTTCATAACACTCGAACAGGCGTACTCCTCGGAATACCAAGGAGTGCAAGGTGCGTTCAAAGATTCGATGATTCACTGAATTCTGCAATTCACATTACTTATCGCATTTCGCTGCGTTCTTCATCGAT…	DQ421079	SH201127.07FU	410	Fungi	p__Basidiomycota	c__Agaricomycetes	o__Cantharellales	f__Incertae_sedis	g__Minimedusa	s__Minimedusa_sp	37	301532 Minimedusa_sp	2.63835e-167	0.99	98.5366	0	0	0	0	0	0	0	0	0	0	0	0	0	0	0	0	0	0	0	0	0	0	0	0	0	0	0	0	0	0	0
>b5734	Otu01339	Unclassified	TTAAGTTCAGCGGGTAGTCCTACCTGATTTGAGGTCAAAATGTCAAGAGTTGTCCTGAAAGGACGGTTATGAGCAGGTTCCCATTAGTTTGCTTCAAAGTCAAGATGGCATAGATAATTATCACACCAAGTGACGGTCCACAAGAGATCCCACTAATGCATTTAAAGGGAGCAGACCATCCACTGAAGGAAGCCAGCAAAGACCCTCACATCCAAGCCTAACTCAAGCCGGTAAAAGCGAGCAAGGTTGATAATTTAATGACACTCAAACAGGCATGCCCTTCGGAATACCAAAGGGCGCAAGGTGCGTTCAAAGATTCGATGATTCACTGAATTCTGCAATTCACATTACTTATCGCATTTCGCTGCGTTCTTCATCGTTGACGAGTCTAG	JF519033	SH220718.07FU	392	Fungi	p__Basidiomycota	c__Agaricomycetes	o__Agaricales	f__Mycenaceae	g__Mycena	s__Mycena_sp	311	309700 Mycena_sp	1.81194e-158	1	96.4286	0	0	0	0	0	0	0	0	0	0	0	0	0	0	0	0	0	0	0	0	0	0	0	0	0	0	0	0	0	0	0
>b106469	Otu02670	Unclassified	TTAAGTTCAGCGGGTAGTCCTACCTGATTTGAGGTCAAATGGTCATAAAAGTTGTCCGACTAGGGACTGATTAGAAGCTATTAACATTCTGCTGATCATTTCGAAAGGCGTAGATAATTATCACACCAATGAAAGGGGATCAAGTTAACCGCTAATGCATTTAAGGAGAGCTGAACCCTAAATGAATAGGTTCCAGCAAAGACTCCCATATCCAAAGCCTCAAGGACTAGAATAAACTAGTAAGAGGTTTGAGAATTTAATGACACTCAAACAGGCATGCCCTTCGGAATACCAAAGGGCGCAAGGTGCGTTCAAAGATTCGATGATTCACTGAATTCTGCAATTCACATTACTTATCGCATTTCGCTACGTTCTTCATCGATGACGAGTCTAG	JF908464	SH221339.07FU	394	Fungi	p__Basidiomycota	c__Agaricomycetes	o__Agaricales	f__Mycenaceae	g__Mycena	s__Mycena_sp	6	309999 Mycena_flavoalba	4.90389e-154	0.97	98.4772	0	0	0	0	0	0	0	0	0	0	0	0	0	0	0	0	0	0	0	0	0	0	0	0	0	0	0	0	0	0	0
>d83421	Otu04364	Unclassified	TTAAGTTCAGCGGGTAGTCCTACCTGATTTTAGGTCAAAATGTCAAGAGTTGTCCTGAAAGGACGGTTATGAGCAGGTTCCCATTAGTTTGCTTCAAAGTCAAGATGGCATAGATAATTATCACACCAAGTGACGGTCCACAAGAGATCCCACTAATGCATTTAAAGGGAGCAGACCATCCACTGACGGAAGCCGGCAAAAGCGAGCAAGGTTGATAATTTAATGACACTCAAACAGGCATGCCCTTCGGAATACCAAAGGGCGCAAGGTGCGTTCAAAGATTCGATGATTCACTGAATTCTGCAATTCACATTACTTATCGCATTTCGCTGCGTTCTTCATCGTTGACGAGTCTAG	JF519033	SH220718.07FU	357	Fungi	p__Basidiomycota	c__Agaricomycetes	o__Agaricales	f__Mycenaceae	g__Mycena	s__Mycena_sp	2	309700 Mycena_sp	6.69945e-109	0.89	96.0784	0	0	0	0	0	0	0	0	0	0	0	0	0	0	0	0	0	0	0	0	0	0	0	0	0	0	0	0	0	0	0
>a8008	Otu02788	Unclassified	TTAAGTTCAGCGGGTAGTCCTACCTGATTTGAGGTCAAGTTTCGAGTTTTCGTCTTTCGACAAAGGTCTTTAGAAGCGCCGACTTCACGACACCCACTAAACACTCCAGCCACGACGATCATTATCACGTCGAAGGCCGTTCATGCATGGGGGTTAGATCGCGCCGCCATCGCTAATGCTTTTAAGGAGAGCCGAAGACCCTAGGGTCGCCCGGCAGCCCCCAAAATCCAAGCCAAACCCTCGAAACGAATCGAGGGATGGTTGAGAATTAAATGACACTCAAACAGGCATGCTCCTCGGAATACCAAGGAGCGCAAGGTGCGTTCAAAGATTCGATGATTCACTGAAAATCTGCAATTCACATTACTTATCGCAATTCGCTGCGTTCTTCATCGATGA…	EU078734	SH210480.07FU	408	Fungi	p__Basidiomycota	c__Agaricomycetes	o__Boletales	f__Paxillaceae	g__Paxillus	s__Paxillus_sp	2	305351 Paxillus_involutus	1.78695e-150	0.97	93.8725	0	0	0	0	0	0	0	0	0	0	0	0	0	0	0	0	0	0	0	0	0	0	0	0	0	0	0	0	0	0	0
>d123307	Otu04035	Unclassified	TTAAGTTCAGCGGGTAGTCCCACCTGATTTGAGGTCAAGTTAAAAAGAAGATTGTCCGTGTGAAGGACGGTTAGAAGCAAGGCTTCGCCTCACGGCGAGCGAAGGGCAGAGGCGTAGATAAACTTATCACACCAAGGCACAAAACGCTTAGAGCCTCAACTAATGCATTCAAGGGGAGCGGATCCAGAGGACCCACAAGAAACCCCCAAATCCCAGCTCAAGCAACGCCTTCCAAAAGAAGACGGCCAAGTGGAGGAATTCACGACACTCAAGCAGGTGTACCCCTCGGAATACCAAGGGGTGCAAGGTGCGTTCAAAGATTCGATGATTCACTGAATTCTGCAATTCACATTACTTATCGCATTTCGCTGCGTTCTTCATCGTTGACGAGTCTAG	JN198493	SH188983.07FU	396	Fungi	p__Basidiomycota	c__Agaricomycetes	o__Russulales	f__Peniophoraceae	g__Peniophora	s__Peniophora_sp	2	296146 Peniophora_sp_J33	3.60413e-79	0.81	98.4848	0	0	0	0	0	0	0	0	0	0	0	0	0	0	0	0	0	0	0	0	0	0	0	0	0	0	0	0	0	0	0
>a10629	Otu01580	Unclassified	TTAAGTTCAGCGGGTAGTCCTACCTGATTTGAGGTCAGAGGTCATAAAGTTGTCTCTCAAGTGAGACGGTTAGAAGCTCGCCAAACGCTTCACGGTCGCGGCGTAGATATTATCACACCGAGAGCCGATCCGCAAGGAATCAAGCTAATGCATTTAAGAGGAGCCGACCGATCAAGGCCGACAAGCCTCCAAGTCCAAGCCTACAAACCACAAAAGCTTATAGGTTGAAGATTTCATGACACTCAAACAGGCATGCTCCTCGGAATACCAAGGAGCGCAAGGTGCGTTCAAAGATTCGATGATTCACTGAATTCTGCAATTCACATTACTTATCGCATTTCGCTGCGTTCTTCATCGATGACGAGTCTAG	EF059994	SH187220.07FU	370	Fungi	p__Basidiomycota	c__Agaricomycetes	o__Polyporales	f__unidentified	g__unidentified	s__Polyporales_sp	36	295294 Polyporales_sp	1.60069e-150	0.99	98.3784	0	0	0	0	0	0	0	0	0	0	0	0	0	0	0	0	0	0	0	0	0	0	0	0	0	0	0	0	0	0	0
>a46150	Otu01354	Unclassified	TTAAGTTCAGCGGGTAGTCCTACCTGATTTGAGGTCAGATTGATAAAAGTGCGCAATCCCGCAGAGGGGAGAGACGCAGGTTGGAAGCTTGACAGGACGGATTTACAATGGCGTAGATAGTTATCACACCGCATACCGCTCCGAAATACATCGGACAGTCCAGCTAATGCATTCAAGGGGAGCCGACTTTTCAGCCAGCAAGACCCCCAAAGTCCAAGCCCCCGCGCCTCTCGAAAGAGACGGGGGGTTGAGAATTTCATGACACTCAAACAGGCATGCTCCTCGGAATACCAAGGAGCGCAAGGTGCGTTCAAAGATTCGATGATTCACTGAATTCTGCAATTCACATTACTTATCGCATTTCGCTGCGTTCTTCATCGATGACGAGTCTAG	UDB011606	SH211192.07FU	393	Fungi	p__Basidiomycota	c__Agaricomycetes	o__Hymenochaetales	f__Repetobasidiaceae	g__Rickenella	s__Rickenella_sp	270	305620 Rickenella_fibula	5.08743e-92	0.82	98.4733	0	0	0	0	0	0	0	0	0	0	0	0	0	0	0	0	0	0	0	0	0	0	0	0	0	0	0	0	0	0	0
>a33309	Otu02446	Unclassified	TTAAGTTCAGCGGGTAGTCCCACCCGATTTGAGGTCAAATTGTCAAAGATTGTCTTGTTAGGACGGTTGGAAGCATAGAGCCCGACAATACAAGCGCGACCCGAAAGTCAACTCCGGTGAAGATTTATCACACCGAATACGCCGCAAAAGCAGGGTACACTCAGGCATTTCAGACGAGCCGTTTGTTACACGGCAACATCCAAGTCCACATACAAACCAACAATAAAGTGGTCGTAGTGAGATTACAATGACACTCAAACGGGTGTACCCTTCGGAATACCAAAGGGTGCAAGGTGCGTTCAAAGATTCGATGATTCACTGAATTCTGCAATTCACATTACTTATCGCATTTCGCTGCGTTCTTCATCGATGACGAGTCTAG	HQ154381	SH213130.07FU	382	Fungi	p__Basidiomycota	c__Agaricomycetes	o__Sebacinales	f__Sebacinaceae	g__unidentified	s__Sebacinaceae_sp	4	306413 Sebacinaceae_sp	4.72875e-154	0.99	98.4293	0	0	0	0	0	0	0	0	0	0	0	0	0	0	0	0	0	0	0	0	0	0	0	0	0	0	0	0	0	0	0
>a114067	Otu04165	Unclassified	TTAAGTTCAGCGGGTAGTCCCACCCGATTTGAGGTCAAATTGTCAAAGGTTGTCTTGTTAGGACGGTTGGAAGCATAGAGCCATGTTAAGCAGACGCGACCCGAAAGTCAACTCCGGTGAAGATTTATCACACCGAATACGCTGCAAAGCAGGGTACACTCAGGCATTTCAGACGAGCCGTTTGTTACACGGCAACATCCAGGTCCACATACAAACGACAATAAAGTGATTGTAGTGAGATTACAATGACACTCAAACGGGTGTACCCTTCGGAATACCAAAGGGTGCAAGGTGCGTTCAAAGATTCGATGATTCACTGAATTCTGCAATTCACATTACTTATCGCATCTCGCTACGTTCTTCATCGATGACGAGTCTAG	HQ154347	SH213131.07FU	380	Fungi	p__Basidiomycota	c__Agaricomycetes	o__Sebacinales	f__Sebacinales_Group_B	g__unidentified	s__Sebacinales_sp	2	306414 Sebacinales_Group_B_sp	1.15433e-137	0.94	98.4211	0	0	0	0	0	0	0	0	0	0	0	0	0	0	0	0	0	0	0	0	0	0	0	0	0	0	0	0	0	0	0
>a7808	Otu01445	Unclassified	TTAAGTTCAGCGGGTAGTCCCGCCTGATTCGAGGTCAGATGATAGATAAATTGTCAATGAAGACGACTAGAAGCAATCCTTTGATTAGTTTGGCCATCTTCTAATAAAAGAGGATGTCCTCAACGATAGATAATTATCACGTCGAGTAGAACCAAGCTGCACTAGGATCCGCTAATAATTTTCGGACCAGCTGTTTGTTACACAGCAGAGTCCAAATCCAAACTCATCAACAAAAAAGCTAATGAGTTTGAGAGCTTCATGACGCTCGAACAGGCGTGCTCCCCGGAATACCAGGGAGCGCAAGGTGCGTTCAAAGATTCGATGATTCACTGAATTCTGCAATTCACATTACTTATCGCATTTCGCTGCGTTCTTCATCGATGACGAGTCTAG	DQ421195	SH199651.07FU	393	Fungi	p__Basidiomycota	c__Agaricomycetes	o__Cantharellales	f__Hydnaceae	g__Sistotrema	s__Sistotrema_sp	131	300954 Sistotrema_sp	6.55333e-159	0.99	98.4733	0	0	0	0	0	0	0	0	0	0	0	0	0	0	0	0	0	0	0	0	0	0	0	0	0	0	0	0	0	0	0
>b39323	Otu01703	Unclassified	TTAAGTTCAGCGGGTAGTCCCACCTGATTCGAGGTCAGATTTGAATAATTTGTTTGTCAGAAGAGACGATTAGAAGCAGTCTAATAGAAGTCTGGCCATCTCTCAATAAAGAGAAATGTCCTCAGCGTAAGATAATTATCACACCGAGTAAGAACCAAGTCTTCCATTAGAGCCGGCTAATACATTTAGGGACAGCCGTTGTAACACAGCAAGTCCCAAATCCAAGCTAAACAATAACAATAAAGTTACTATCGCTTGAGAGCTTCATGACACTCGAACAGGCGTGCTCCTCGGAATACCAAGGAGCGCAAGGTGCGTTCAAAGATTCGATGATTCACTGAATTCTGCAATTCACATTACTTATCGCATTTCGCTGCGTTCTTCATCGTTGACGAGTCT…	DQ974821	SH197509.07FU	401	Fungi	p__Basidiomycota	c__Agaricomycetes	o__Cantharellales	f__Hydnaceae	g__Sistotrema	s__Sistotrema_sp	50	300058 Sistotrema_sp	1.03576e-148	0.95	98.5037	0	0	0	0	0	0	0	0	0	0	0	0	0	0	0	0	0	0	0	0	0	0	0	0	0	0	0	0	0	0	0
>a16819	Otu01488	Unclassified	TTAAGTTCAGCGGGTAGTCCTACCTGATTTGAGGTCAAATTGTCATAGATTGTCTTTACAGACGATTATAAGCAGTGCTCATTCATGCAAGTCCACGGCGTAGATAATTATCACACCAATAGACAAGTTTGCACAAGGCAACCAGCTAATGCATTTCAGAAGAGCTGATTTCAAAAACATGAAACCAGCAACTCCCACATCCAAGCCATTCACCAGTAAAACTGATAAAGGTTGAGAATTTAATGACACTCAAACAGGCATGCTCCTCGGAATACCAAGGAGCGCAAGGTGCGTTCAAAGATTCGATGATTCACTGAATTCTGCAATTCACATTACTTATCGCATTTCGCTGCGTTCTTCATCGATGACGAGTCTAG	UDB015716	SH229046.07FU	377	Fungi	p__Basidiomycota	c__Agaricomycetes	o__Agaricales	f__Strophariaceae	g__Stropharia	s__Stropharia_cyanea	133	311408 Stropharia_cyanea	9.92963e-153	0.99	98.4085	0	0	0	0	0	0	0	0	0	0	0	0	0	0	0	0	0	0	0	0	0	0	0	0	0	0	0	0	0	0	0
>d14463	Otu02992	Unclassified	TTAAGTTCAGCGGGTAGTCCTACCTGATTTGAGGTCAAACGTCGATAAGGAAGACGCCTTCGAAAAGGCGTCGACTGATTAGAGGCACGAGACCATTCGTTCGTGCACTTCGGCGAGCGGCGATCATTATCACGCCAAAGGCCTTGTCATGCACAGTCGAAAGTCGACCGCAAGCCAATACATTTCAGAGGAGCCCGAGTCCTGAAAAACAGGTCTCCGGCAGCCTCCACGATCCAAGCTCCCTCTCGAAGCAAATCGAGAGGGGTTGAGAATTTAATGACGCTCAAACAGGCATGCTCATCGGAACACCGATAAGCGCAAGGTGCGTTCAAAGATTCGATGATTCACTGTAGATCTGCAATTCACATTACATATCGCGATTCGCTGCGTTCTTCATCG…	UDB015800	SH176741.07FU	412	Fungi	p__Basidiomycota	c__Agaricomycetes	o__Boletales	f__Suillaceae	g__Suillus	s__Suillus_variegatus	2	290695 Suillus_variegatus	2.65334e-167	0.99	98.5437	0	0	0	0	0	0	0	0	0	0	0	0	0	0	0	0	0	0	0	0	0	0	0	0	0	0	0	0	0	0	0
>d25732	Otu04046	Unclassified	TTAAGTTCAGCGGGTAGTCCTACCTGATTTGAGATCGAACGTTCAAAAAGCTGTCTTCGCTGAGGAAGACCTTTGTGAGCTCCAGCGAACCTCCATCGCTGAAGGTTACCTGGCAGACGGCCACAAGCGTAGATATTTATCACACCCATGACGCCACCAAACACTAGCAAGCTGATCCATTTGAGAGGAGCCGACCAAAGGCCAGCAAAACCTCCAGAAGTCCAAGCTCATCACGGCAAACCATGAGAGTTGAGGTGTTCATGATACTCAAACAGGCATGCCCCTCGGAATAGCCAAGGGGCGCAAGGTGCGTTCAAAGATTCGATGATTCACTGAATTCTGCAATTCACATTACTTATCGCATTTCGCTGCGTTCTTCATCGGTGACGAGTCTA	UDB000119	SH189359.07FU	395	Fungi	p__Basidiomycota	c__Agaricomycetes	o__Thelephorales	f__Thelephoraceae	g__Thelephora	s__Thelephora_caryophyllea	2	296301 Thelephora_caryophyllea	3.09105e-160	0.99	98.7342	0	0	0	0	0	0	0	0	0	0	0	0	0	0	0	0	0	0	0	0	0	0	0	0	0	0	0	0	0	0	0
>a8197	Otu02801	Unclassified	TTAAGTTCAGCGGGTAGTCCTACCTGATTTGAGATCAAACGTTAAAGCTGTCCTCGCTGAGGAGAGACGTCTGTGAGCCCCAGCGAACCTCCATCGCTGGAGGTTACCTGGTGGAAAACCACAAGCGTAGATAGTTATCACACCTGGGGTGCCACCAAACACTGGTAAGCTGATTCATTTGAGAGGAGCTGACGGCAGACCAGCAAGACCTCCAAAGTCCAAGCTCATCATGGTGGAGACCATGAGAGTTGAGGCGTTCATGATACTCAAACAGGCATGCCCTTCGGAATAGCCAAAGGGCGCAAGGTGCGTTCAAAGATTCGATGATTCACTGAATTCTGCAATTCACATTACTTATCGCATTTAGCTACGTTCTTCATCGATGACGAGTCTAG	UDB008017	SH185269.07FU	395	Fungi	p__Basidiomycota	c__Agaricomycetes	o__Thelephorales	f__Thelephoraceae	g__unidentified	s__Thelephoraceae_sp	5	294423 Thelephoraceae_sp	1.24532e-141	0.94	98.481	0	0	0	0	0	0	0	0	0	0	5	0	0	0	0	0	0	0	0	0	0	0	0	0	0	0	0	0	0	0	0
>a132677	Otu02539	Unclassified	TTAAGTTCAGCGGGTAGTCCTACCTGATTTGAGATCGAACGTTAAAAAAGCTGTCCTCGCTGAGGAGAGACATCTGTGAGCTCCAGCAAACCTTTGTGACCAAAGGTTACCTGGCAGACAACAGCGAGCGTAGATATTTATCACACCCGTGATGCCACCAAACACTGGGAGGCTGATTAATTTGAGAGGAGCCGACCACAGGCCAGCAAAACCCCCAGAGTCCAACTCATCATGGCAAACCATGAGAGTTGAGGTGTTCATGATACTCAAACAGGCATGCCCCTCGGAATAGCCAAGGGGCGCAAGGTGCGTTCAAAGATTCGATGATTCACTGAATTCTGCAATTCACATTACTTATCGCATTTCGCTGCGTTCTTCATCGTTGACGAGTCTAG	EU427330	SH184510.07FU	395	Fungi	p__Basidiomycota	c__Agaricomycetes	o__Thelephorales	f__Thelephoraceae	g__unidentified	s__Thelephoraceae_sp	2	294055 Thelephoraceae_sp	1.11462e-160	0.99	98.481	0	0	0	0	0	0	0	0	0	0	0	0	0	0	0	0	0	0	0	0	0	0	0	0	0	0	0	0	0	0	0
>d65908	Otu03401	Unclassified	TTAAGTTCAGCGGGTAGTCCTACCTGATTTGAGATCAAACGTTCAAAAAGCTGTCCTCCTCAAGGAGAGACATCTGTGAGCCTCCAGCGAACCTCCATCACTGAAGGTTACATGGCAGAGAACCACAAGCGTAGATAGTTATCACACCTGTGATGCCACCAAACACTGGCAGGCTGATCCATTTGAGAGGAGCCGACGCTAGGCCAGCAAGACCCCCAAAGTCCAAGCTCATCATGGCAGACCATGAGAGTTGAGATGTTCATGATACTCAAACAGGCATGCCCTTCAGAATAGCCAAAGGGCGCAAGGTGCGTTCAAAGATTCGATGATTCACTGAATTCTGCAATTCACATTACTTATCGCATTTCGCTGCGTTCTTCATCGGTGACGAGTCTAG	FN397409	SH177879.07FU	397	Fungi	p__Basidiomycota	c__Agaricomycetes	o__Thelephorales	f__Thelephoraceae	g__unidentified	s__Thelephoraceae_sp	2	291281 Thelephoraceae_sp	1.45792e-161	0.99	98.4887	0	0	0	0	0	0	0	0	0	0	0	0	0	0	0	0	0	0	0	0	0	0	0	0	0	0	0	0	0	0	0
>c113047	Otu04044	Unclassified	TTAAGTTCAGCGGGTAGTCCTACCTGATTTGAGATCAAATGTTCACAAAATTGTCCTCGTAAAAGAGAGACGTTTATGAGCTCCAGCGAACCTCCATGACTGGAGGTTACCTGGCGGGCAACAGCAAGCGTAGATAGTTATCACACCTGCGATGCCACCAAACACTGGTAAGCTGATCCATTTGGGAGGAGCCGACCACAGGCCGGCAAGACCCCCAGAGTCCAAGCTCGTCATGGCGAACCATGGGAGTTGAGGTGTTCATGATACTCAAACAGGCATGCTCTTCGGAATAGCCAAAGAGCGCAAGGTGCGTTCAAAGATTCGATGATTCACTGAATTCTGCAATTCACATTACTTATCGCATTTCGCCACGTTCTTCATCGATGACGAGTCTAG	FM866390	SH006974.07FU	396	Fungi	p__Basidiomycota	c__Agaricomycetes	o__Thelephorales	f__Thelephoraceae	g__unidentified	s__Thelephoraceae_sp	2	314827 uncultured_Tomentella	3.36025e-137	0.99	85.3535	0	0	0	0	0	0	0	0	0	0	0	0	0	0	0	0	0	0	0	0	0	0	0	0	0	0	0	0	0	0	0
>a90378	Otu02669	Unclassified	TTAAGTTCAGCGGGTAGTCCTACCTGATTTGAGATCAAACTGTCAAAATATGTCCTCACTGGGGAGAGACATTTATAAGCTCCGATGAACCTCCATTGCTGAGGGTTACCTGGTGGAAAACCACAAGCGTAGATAGTTATCACACCTGTGATCCCACCAAACACCGGCAAGCTAATTCATTTGAGAGGAGCTGACCACAGGCCAGCAAGACCCCCAAAGTCCAAGCTCATCACGGCAAGCCGTGAGAGTTGAGGTGTTCATGATACTCAAACAGGCATGCCCTCTGGAATATCCAAAGGGCGCAAGGTGCGTTCAAAGATTCGATGATTCACTGAATTCTGCAATTCACATTACTTATCGCATTTCGCTGCGTTCTTCATCGATGACGAGTCTAG	UDB003302	SH177783.07FU	395	Fungi	p__Basidiomycota	c__Agaricomycetes	o__Thelephorales	f__Thelephoraceae	g__Tomentella	s__Tomentella_sp	6	291187 Tomentella_stuposa	1.36399e-153	0.97	98.481	0	0	0	0	0	0	0	0	0	0	6	0	0	0	0	0	0	0	0	0	0	0	0	0	0	0	0	0	0	0	0
>a63753	Otu03026	Unclassified	TTAAGTTCAGCGGGTAGTCCTACCTGATTTGAGATCAAACATTCAAGAAGTCGTCCTCGCTATGGAGAGACATTTATGAGCTCCAGTGAACCTCCATTGCTGAAGGATGCCTGGCAGGAAACCACAAGCGTAGATAATTATCACACCTGTGGTGCCGCCAAACACTGGCAAGCTGATTCATTTGAGAGGAGCCGACCGCTGGCCAGCAAGACCCCCAAAGTCCAAGCTCATCATGGCAAGCCATGAGAGTTGAGGTGTTCATGATACTCAAACAGGCATGCCCTTCGGAATAGCCAAAGGGCGCAAGGTGCGTTCAAAGATTCGATGATTCACTGAATTCTGCAATTCACATTACTTATCGCATTTCGCTGCGTTCTTCATCGATGACGAGTCTAG	EU625853	SH205649.07FU	396	Fungi	p__Basidiomycota	c__Agaricomycetes	o__Thelephorales	f__Thelephoraceae	g__Tomentella	s__Tomentella_sp	4	303335 Tomentella_sp	6.41442e-155	0.97	98.4848	0	0	0	0	0	0	0	0	0	0	4	0	0	0	0	0	0	0	0	0	0	0	0	0	0	0	0	0	0	0	0
>c34234	Otu04042	Unclassified	TTAAGTTCAGCGGGTAGTCCTACCTGATTTGAGATCGAACGGTCAAAAAGCTGTCTTCACTGAGGAAAGACATTTATAAGCTCCAGCGAACCTCTGTCACCAAAGGTTACTCAGCAGACAGCCACAAGCGTAGATAGTTATCACACCTGTGATGCCACCAAATACTGGTAAGCTGATCCATTTGAGAGGAGCTGACCACAGGCCAGCAAAACCCCCAAAATCCAAGCTCATCATGGCAAACCATGAGAGTTGAGGTGTTCATGATACTCAAACAGGCATGCCCCTCGGAATAGCCAAGGGGCGCAAGGTGCGTTCAAAGATTCGATGATTCACTGAATTCTGCAATTCACATTACTTATCGCATTTCGCTGCGTTCTTCATCGTTGACGAGTCTAG	UDB003315	SH189365.07FU	396	Fungi	p__Basidiomycota	c__Agaricomycetes	o__Thelephorales	f__Thelephoraceae	g__Tomentella	s__Tomentella_sp	2	296307 Tomentella_terrestris	8.34058e-156	0.98	98.4848	0	0	0	0	0	0	0	0	0	0	0	0	0	0	0	0	0	0	0	0	0	0	0	0	0	0	0	0	0	0	0
>c7699	Otu01735	Unclassified	TTAAGTTCAGCGGGTAGTCCTACCTGATTTGAGGTCGAATTTGTCAGGCGCGGGTCGCCCCGGCGCGATCGAAGATTTCCCCTTGTCGGCTTTCTCGGACGACGTAGATAATTATCACATCGACGATACTCTGCCAAAGGATTGGAAAGCTCATGCATTCAAGAGGAGCCGACAAGCACGTGAGACGTGCGCCAGCAAAGACCTCCAAGTCCAACTTCACCCTTCGCAAGAAGTTCGGGGCAGTTGAGAATTTCATGACACTCAAACAGGCATGCTCCTCGGAATACCAAGGAGCGCAAGGTGCGTTCAAAGATTCGATGATTCACTGAATTCTGCAATTCACATTACTTATCGCATTTCGCTGCGTTCTTCATCGTTGACGAGTCTAG	UDB000202	SH184852.07FU	389	Fungi	p__Basidiomycota	c__Agaricomycetes	o__Thelephorales	f__Thelephoraceae	g__Tomentellopsis	s__Tomentellopsis_sp	46	294228 Tomentellopsis_sp	3.49653e-145	0.98	91.7738	0	0	0	0	0	0	0	0	0	0	0	0	0	0	0	0	0	0	0	0	0	0	0	0	0	0	0	0	0	0	0
>c9718	Otu02196	Unclassified	TTAAGTTCAGCGGGTAGTCCTACCTGATTTGAGGTCGAATTTGTCAGACGCGGGTCGCCCCGGCGTGATCGAAGATTTCCCCTTGTCGGCTTTCTCGGACGACGTAGATAATTATCACATCGACGATACTCTGCCAAAGGATTGGAAAGCTCATGCATTCAAGAGGAGCCGACAAGCACGGCGGAGGGCGCGGAGCCCACCACACATGCGCCAGCAGAGACCTCCAAGTCCAACCTCACCCGCAGGCCACAAGAGCCCGGGGCAGTTGAGAATTTCATGACACTCAAACAGGCATGCTCCTCGGAATACCAAGGAGCGCAAGGTGCGTTCAAAGATTCGATGATTCACTGAATTCTGCAATTCACATTACTTATCGCATTTCGCTGCGTTCTTCATCGT…	UDB017802	SH184857.07FU	411	Fungi	p__Basidiomycota	c__Agaricomycetes	o__Thelephorales	f__Thelephoraceae	g__Tomentellopsis	s__Tomentellopsis_sp	11	294233 Tomentellopsis_pulchella	2.95611e-148	0.94	98.5401	0	0	0	0	0	0	0	0	0	0	0	0	0	0	0	0	0	0	0	0	0	0	0	0	0	0	0	0	0	0	0
>a114850	Otu01625	Unclassified	TTAAGTTCAGCGGGTAGTCCTACCTGATTTGAGGCCAGATTGTCAAGAAGTGACCGCCACCCAAAGGGCAAGTCGAAGTGAGGCACGGAAGCGAGCGAGACCGATTGAAGGCGAGGAAAATACAACGCCAAAGGTGCAAGCCGCATGATGCGGGCCAAACCGATGATTTTAAGGGGAGCCGCCTCGCGGCAGCAACCCCCAACTCCAAACCGCGACGGGCGCGAACCCGAGGGGTTTGATGATATCAAGACACTCAAACAGGCATGCCCTCCGGAATACCAGAGGGCGCAAGGTGCGTTCAAAGATTCGATGATTCACTGAATTCTGCAATTCACATTACTTATCGCATTTCGCTGCGTTCTTCATCGATGACGAGTCTAG	JF691365	SH188947.07FU	381	Fungi	p__Basidiomycota	c__Agaricomycetes	o__Trechisporales	f__unidentified	g__unidentified	s__Trechisporales_sp	65	296122 Trechisporales_sp	1.6491e-150	0.98	98.4252	0	0	7	0	0	0	0	0	0	0	0	0	0	0	0	0	0	0	0	0	0	0	0	0	0	0	0	0	0	0	0
>a46210	Otu01671	Unclassified	TTAAGTTCAGCGGGTAGTCCTACCTGATTTGAGGTCAGATTTCAAAGTTTGGTTTTGACCGCCGCTCTACAGCAGGTCGTGGAAGGACACGGAAGGGGAACGTCTCGGGGAGAGCGAGGATGGTACAACGCCCAGTCGAGTTCGACCCACAGGTCCAACCGATGCATTTGAAGGGAGCGGCCTCACGGCCGCACGCCCCCAGCTCCAACCGCGTCCCGCACAAAACGGGAAGGGTTGATGACTTCAAGACACTCAAACAGGCATGCTCCTCGGAATACCAAGGAGCGCAAGGTGCGTTCAAAGATTCGATGATTCACTGAATTCTGCAATTCACATTACTTATCGCATTTCGCTGCGTTCTTCATCGATGACGAGTCTAG	AB520451	SH009016.07FU	380	Fungi	p__Basidiomycota	c__Agaricomycetes	o__Trechisporales	f__unidentified	g__unidentified	s__Trechisporales_sp	36	315759 Trechisporales_sp	3.01271e-129	0.92	98.4211	0	0	0	0	0	0	0	0	0	0	0	0	0	0	0	0	0	0	0	0	0	0	0	0	0	0	0	0	0	0	0
>a3040	Otu01772	Unclassified	TTAAGTTCAGCGGGTAGTCCTACCTGATTTGAGGCCAGATTGTCAAGAAGTGACTGCCGCCCAAAGGGCAAGTCGAGGTGAGGCGCGGAAGCGAGCGAGACCGATTGAAGGCGAGGAAAATACAACGCCAAAGGTGCAAGCCGCATGGTGCGGGCCAAACCGATGATTTTAAGGGGAGCCGCCTCGCGGCAGCAAGCCCCCAACTCCAAACCGCAACGGGCGCGAACCCAAGGGGTTTGATGATATCAAGACACTCAAACAGGCATGCCCTCCGGAATACCAGAGGGCGCAAGGTGCGTTCAAAGATTCGATGATTCACTGAATTCTGCAATTCACATTACTTATCGCATTTCGCTGCGTTCTTCATCGTTGACGAGTCTAG	JF691365	SH188947.07FU	382	Fungi	p__Basidiomycota	c__Agaricomycetes	o__Trechisporales	f__unidentified	g__unidentified	s__Trechisporales_sp	34	296122 Trechisporales_sp	1.6542e-150	0.98	98.4293	0	0	3	0	0	0	0	0	0	0	0	0	0	0	0	0	0	0	0	0	0	0	0	0	0	0	0	0	0	0	0
>b122860	Otu02211	Unclassified	TTAAGTTCAGCGGGTAGTCCTACCTGATTCGAGGTCAGATTTCAAAGTGTGCTTGACCGCCGCTCGGACGGCAGTCGAGGCGGGGGACGCGAGGCCCGGTCGGACGAGGACAATACAACGCCCGTGGGTGCTCGGAGACCCCACCGATGCATTCGAGGGGAGCCGCGTCGCCGCGGCAGACCCCCAAGTCCGCCGCCAGCCGGTCGCGAAACCGGAGGCGGCGATGAATTCAAGACACTCGAACAGGCATGCCCATCGGAATACCAAAGGGCGCAAGGTGCGTTCAAAGATTCGATGATTCACTGAATTCTGCAATTCACATTACTTATCGCATTTCGCCACGTTCTTCATCGATGACGAGTCTAG	GU054017	SH015069.07FU	366	Fungi	p__Basidiomycota	c__Agaricomycetes	o__Trechisporales	f__unidentified	g__unidentified	s__Trechisporales_sp	10	318407 Trechisporales_sp	3.26954e-145	0.98	98.3607	0	0	0	0	0	0	0	0	0	0	0	0	0	0	0	0	0	0	0	0	0	0	0	0	0	0	0	0	0	0	0
>c165167	Otu04268	Unclassified	TTAAGTTCAGCGGGTAGTCCTACCTGATTTGAGGCCAGATTGTCAAGAAGTGACTGCCGCCCAAAGGGCAAGTCGAGGTGAGGCGCGGAAGCGAGCGAGACCGATTGAAGGCGAGGAAAATACAACGCCAAAGGTCCAAACCGATGAGTTTAAGGGGAGCCGCCTCGCGGCAGCAAGCCCCCAACTCCAAACCGCAACGGGCGCGAACCCAAGGGGTTTGATGATATCAAGACACTCAAACAGGCATGCCCTCCGGAATACCAGAGGGCGCAAGGTGCGTTCAAAGATTCGATGATTCACTGAATTCTGCAATTCACATTACTTATCGCATTTCGCCTCGTTCTTCATCGATGACGAGTCTAG	JF691365	SH188947.07FU	363	Fungi	p__Basidiomycota	c__Agaricomycetes	o__Trechisporales	f__unidentified	g__unidentified	s__Trechisporales_sp	2	296122 Trechisporales_sp	5.93344e-124	0.92	98.3471	0	0	0	0	0	0	0	0	0	0	0	0	0	0	0	0	0	0	0	0	0	0	0	0	0	0	0	0	0	0	0
>a136772	Otu03051	Unclassified	TTAAGTTCAGCGGGTAGTCCTACCTGATTTGAGGTCAAATTGTCATAAGTTGCATTTAATTAGAAGCTTGACCTCATTATAAGCTGCTTGAGCAAATGGCATAGATAATTATCACACCAAAGCTAGGCAACAAAGGTCCCGCTAATGCGTTTAAGGAGAGCCGACTTCTGAGAAAGCCCGCAAGCTCCCACATCCAATCCCTCATCAACCAAATAAATAAATAAAAGGCTGAAAGGGTTGAGAATTTTATGACACTCAAACAGGCATGCTCCTCGGAATACCAAGGGGCGCAAGGTGCGTTCAAAGATTCGATGATTCACTGAATTCTGCAATTCACATTACTTATCGCATTTCGCTGCGTTCTTCATCGATGACGAGTCTAG	UDB011582	SH219354.07FU	383	Fungi	p__Basidiomycota	c__Agaricomycetes	o__Agaricales	f__Tricholomataceae	g__Tricholoma	s__Tricholoma_stiparophyllum	2	309078 Tricholoma_stiparophyllum	2.8919e-156	0.99	98.4334	0	0	0	0	0	0	0	0	0	0	0	0	0	0	0	0	0	0	0	0	0	0	0	0	0	0	0	0	0	0	0
>b102730	Otu02369	Unclassified	TTAAGTTCAGCGGGTAGTCCTACCTGATTTGAGGTCAAAAATGTCATAAATTTGTCCAAGTCAATGGACTGTTAGAAGCTGAACCCCATGTTAAAGCTGCTTCACAACCATGGCGTAGATAATTATCACACCAAAAGCTGGTCCACAAAGGTTCCGCTAATGCATTTAAGAGGAGCTGACTTCTAGAGAAGCCCGCAATAACCTCCACATCCAAGCCAATCCAACTTGCAAAAGCTGAAAAGGTTGAGAATTTAATGACACTCAAACAGGCATGCTCCTCGGAATACCAAGGAGCGCAAGGTGCGTTCAAAGATTCGATGATTCACTGAATTCTGCAATTCACATTACTTATCGCATTTCGCTGCGTTCTTCATCGGTGACGAGTCTAG	FJ428582	SH218328.07FU	389	Fungi	p__Basidiomycota	c__Agaricomycetes	o__Agaricales	f__Tricholomataceae	g__unidentified	s__Tricholomataceae_sp	2	308622 Tricholomataceae_sp	4.54649e-146	0.99	92.0308	0	0	0	0	0	0	0	0	0	0	0	0	0	0	0	0	0	0	0	0	0	0	0	0	0	0	0	0	0	0	0
>c128357	Otu03466	Unclassified	TTAAGTTCAGCGGGTAATCCTACCTGATTTGAGGTCAAACAGTTCAAATTGTCTAGTAATCCTAGACTGTTCGAAAGCAGCTACACTTAACATCCCTACTTATACGGCGTAGATAATTATCACACCAAAGTGGGGAACAGTAACCACTAATGTTTTTAAGAGGAGCAAACTAATCAAAGCCTGCAACCTCCACATCCAGAGTCTTGACTCGTCATTACAACAAGTTAAGATCTGAGAATTTAATGACACTCAAACAGGCATACTCCTCGGAATACCAAGGAGTGCAAGGTGCGTTCAAAGATTCGATGATTCACTGAATTCTGCAATTCACATTACTTATCGCATTTCGCTGCGTTCTTCATCGATGACGAGTCTAG	JQ347154	SH178376.07FU	377	Fungi	p__Basidiomycota	c__Agaricomycetes	o__Agaricales	f__Tricholomataceae	g__unidentified	s__Tricholomataceae_sp	2	291449 Tricholomataceae_sp	1.35761e-126	0.92	98.4085	0	0	0	0	0	0	0	0	0	0	0	0	0	0	0	0	0	0	0	0	0	0	0	0	0	0	0	0	0	0	0
>a139695	Otu00077	Saprotroph	TTAAGTTCAGCGGGTAGTCCTACTTGATTTGAGGTCAAAATGCACTTGTATATAAGTTTATGGTAAGCCCATTCCTTGATTTGCGTTCCCATTGATTTTCAAGTTACAACAACGGGTCAAGCCGCAAGAAAAGGATCCAGCTTGTTATATTTCAATGCAGTGGACTTAACCACACGCATCATGGTCCGAACCCTAAACAACACCTCCAGAGAAGTGCGGGGTTGAGAGGTACGCGACACTCAAACAAGCATGCTCCCAGGAATAACCCGAGAGCGCAAGGTGCGTTCAAAGATTCGATGATTCACAAAATTCTGCAATTCACATTACATTTCGCGTTTCGCTGCGTTCTTCATCGATGACGAGTCTAG	GQ180106	SH476530.07FU	368	Fungi	p__Basidiomycota	c__Agaricostilbomycetes	o__Incertae_sedis	f__Incertae_sedis	g__Cystobasidiopsis	s__Cystobasidiopsis_sp	2	330376 Cystobasidiopsis_sp_RB_2009a	1.45209e-138	0.99	92.1196	0	0	0	0	0	0	0	0	0	0	0	0	0	0	0	0	0	0	0	0	0	0	0	0	0	0	0	0	0	0	0
>d58051	Otu04194	Unclassified	TTAAGTTCAGCGGGTAGTCCTACTTGATTTGAGGTCATTATGTACTATTAAAATTCAAAGTTTAAAGCTCTTTGCAACTGTCAATAACGATCCCCGATGAGTTTATAGATACTACAACATCAGGTCAAGCCGTTACAATCGTGCATGCAGCTTACTGCATTTCAGTCTAGCCGAATAAACGGCAAAAGACCATGATTCAAGCCCAGGCTACCTCTCATTACAAAAGGCGGGGTTGAGAAGTTCGCGACACTCAAACAAGCATGCTTTCCAGAATAACTAGAAGGCGCAAGGTGCGTTCAAAGATTCGATGATTCACTGAGTTCTGCAATTCACATTACGTATCGCATTTCGCTGCGTTCTTCATCGTTGACGAGTCTAG	AF444596	SH476649.07FU	379	Fungi	p__Basidiomycota	c__Agaricostilbomycetes	o__Agaricostilbales	f__Kondoaceae	g__Kondoa	s__Kondoa_myxariophila	2	330393 Kondoa_myxariophila	2.77094e-152	0.99	98.4169	0	0	0	0	0	0	0	0	0	0	0	0	0	0	0	0	0	0	0	0	0	0	0	0	0	0	0	0	0	0	0
>b70139	Otu00168	Unclassified	TTAAGTTCAGGGGGTAGTCCTGCTCGATTTGAGGTCAAAAGGTAGAAATGCCCCGACAGGCGTTTGTGGTAAGCTCGTCCTGACCAGGCGATCCCCATTGAAAGTTCTTATGACAACGGGTCAAGCCGCCAGTACAAAGGTACAGCTTCTTGCATTTCAGCGGAGTTCGCGCATTGGAACAGACCGCCACGATCCAACCCGGACACCGCTGTTGCCAACGGGGGGTTGAGAGGTACGCGACACTCAAACGAACATGCTCCCAGGAATGACCCGAGAGCGCAAGGTGCGTTCAAAGATTCGATGATTCACTGAATTCTGCAATTCACATTACATTTCGCGCTTTGCTGCGTTCTTCATCGTTGACGAGTCTAG	KJ778629	SH472827.07FU	372	Fungi	p__Basidiomycota	c__Agaricostilbomycetes	o__Agaricostilbales	f__Incertae_sedis	g__Mycogloea	s__Mycogloea_sp	3	329857 Mycogloea_nipponica	7.62444e-86	0.83	98.3871	0	0	0	0	0	0	0	0	0	0	0	0	0	0	0	0	0	0	0	0	0	0	0	0	0	0	0	0	0	0	0
>a17492	Otu01377	Unclassified	TTAAGTTCAGCGGGTAGTCCTGCCTGATCTGAGGTCAAAACCAAAGATGTATAGGGTAATGCAATCAAACGGCACCACAACAGGAGCGGCTCCTCGCACGAAGCGAGGATCCTAGACGAACGTTATCACTATCACGCCTAGTCGGGCCAACTCACAAGGGTGCTCGATCACAAATGTATTTCAGGTGAGCCAGACCGAAGCCGGCAAGCACCCACGATCCAACCAGCCAACCACAAAGGATTGGAGGTTGAGAATTTCGAGACACTCAGACAGACATGCCCTTCGGAATACCAAAGGGCGCAAGGTGCGTTCAAAGATTCGATGATTCACTGAATTCTGCAATTCACATTACTTATCGCATTTCGCTGCGTTCTTCATCGATGACGAGTCTAG	KF428440	SH206996.07FU	393	Fungi	p__Basidiomycota	c__Atractiellomycetes	o__Atractiellales	f__unidentified	g__unidentified	s__Atractiellales_sp	236	303904 Atractiellales_sp	5.92081e-112	0.87	98.4733	0	0	0	0	0	0	0	0	0	0	0	3	0	0	0	0	0	0	0	0	0	0	0	2	0	0	0	0	0	0	0
>b42821	Otu01776	Unclassified	TTAAGTTCAGCGGGTAGTCCTGCCTGATCTGAGGTCTAAACCAAAGATGTAAAAAAGAGTGCAACGACAAAGCCCAACAGGAGCGGCTCCTCGCCGAAGCGAGGATCCTAGACGAACGTTATCACCATCACGCCTAGTCGGGCCAACTCACAAGGACACAACATCGCAAATTCATTTCAGGTGAGCTGACAAGGCCAGCAAGCACCCATGATCCAACCAACCCATCACAAAGGATGAGAGATTGAGAATTTCATGACACTCAGACAGACATGCCCTTCGGAATACCAAAGGGCGCAAGATGCGTTCAAAGATTCGATGATTCACTGAATTCTGCAATTCACATTACTTATCACATTTCGCTGCGTTCTTCATCGATGACGAGTCTAG	EF406119	SH466499.07FU	387	Fungi	p__Basidiomycota	c__Atractiellomycetes	o__Atractiellales	f__unidentified	g__unidentified	s__Atractiellales_sp	14	328991 Atractiellales_sp_WIM(M)1397	1.07681e-125	0.91	98.4496	0	0	0	0	0	0	0	0	0	0	0	0	0	0	0	0	0	0	0	0	0	0	0	0	0	0	0	0	0	0	0
>c153921	Otu02238	Saprotroph	TTAAGTTCAGCGGGTCTTCCTACCTGATTTGAGATCATTGTTTGTTTGTGTTGCTCATCAAGCAAGCTTGATTCGGTGCCTAGTCTAGCAGCTGTCCCCGAACTGAGTAGTCCCCGAACAGAGAGTACTACACACCACAGCACCACAACAACAAAACACAAAGCTCCGCATCTCGAGAACTACGTTCATTCACATACGGTGCTAGCGTGCATGCATTTACAAGTACCCAAACGGGACACTCGACCTCCTCTCTTGTCTCCAACAGAGAAAAATGACGATTCTCAAACAGGCATACTCCAAAGGAGTGCAATATGCGTTCAAAGATTCAATGATTCACGGAAAGCAATTCACATTACGTATCGCATTTCGCTGCGTTCTTCATCGTTGACGAGTCTAG	DQ485609	SH206516.07FU	397	Fungi	p__Chytridiomycota	c__Chytridiomycetes	o__Rhizophydiales	f__Kappamycetaceae	g__Kappamyces	s__Kappamyces_sp	4	303674 Kappamyces_sp_JEL_001	5.25145e-61	0.85	64.7355	0	0	0	0	0	0	0	0	0	0	0	0	0	0	0	0	0	0	0	0	0	0	0	0	0	0	0	0	0	0	0
>a10771	Otu01266	Saprotroph	TTAAGTTCAGCGGGTTTTCCTACCTGATTTGAGACCAAGTGTTCAAAGAAGGCTGACTGACGTCGTCCAACTCTGGATAATAGTTGAGTTACCCAGTCCAATCAAACCGACAATTCCATGAGAACAGACGTACTTGTGAGTTGCCTCATTCATGCGTATGCCCAAGAACTGTTAGTCCAAGGATGCGTAACATTTCATTTCAGGTCATTGAGGCTGTGAAGTCTCAAAGGACCCATATCCAACCGCAATAAAAGCGGTTGATAGATTTACTGATTCTCAAACAGGCATGCTCTCCGGAATACCAAAGAGCGCAATGTGCGTTCAAAGATTCGATGATTCACTGAATTCTGCAATTCACATTACTTATCGCATTTCGCTGCGTTCTTCATCGATGACGAG…	EU379203	SH202562.07FU	404	Fungi	p__Chytridiomycota	c__Chytridiomycetes	o__Rhizophlyctidales	f__Rhizophlyctidaceae	g__Rhizophlyctis	s__Rhizophlyctis_rosea	1022	302120 Rhizophlyctis_rosea	3.65498e-145	0.99	88.6139	0	0	0	0	0	0	0	0	0	0	0	0	0	0	0	0	0	0	0	0	0	0	0	0	0	7	0	0	0	0	0
>b32628	Otu01638	Saprotroph	TTAAGTTCAGCGGGTTTTCCTACCTGATTTGAGACCAAGTGTTCAGGGAAGGCCGACTGACGTCAGCCAACTCTGGGTAATGGTTGAGTTACACACTCCAAGCAAACTGACAGCCCTTGACGACAAACGTACTTGTGAGTTGCCTCATTCATGCGTATGCCCTAGAACTGTTGGTTCAAGGAAGCGTAACATTGAAATTCAGGCTATTGAGACTGTGAAGTCTCAAAGCGCCCATATCCAACCGCAATGAAGCAGTTGATGAATTTACTGATTCTCAAACAGGCATGCTCTCCGGAATACCAAAGAGCGCAATGTGCGTTCAAAGATTCGATGATTCACTGAATTCTGCAATTCACATTACTTATCGCATTTCGCTGCGTTCTTCATCGTTGACGAGTC…	EU379227	SH202563.07FU	402	Fungi	p__unidentified	c__Chytridiomycetes	o__Rhizophlyctidales	f__Rhizophlyctidaceae	g__Rhizophlyctis	s__Rhizophlyctis_sp	44	302121 Rhizophlyctis_rosea	1.65291e-142	0.98	88.5572	0	0	0	0	0	0	0	0	0	0	0	0	0	0	0	0	0	0	0	0	0	0	0	0	0	0	0	0	0	0	0
>d73383	Otu02344	Saprotroph	TTAAGTTCAGCGGGTTTTCCTACCTGATTTGAGACCAAGTGTTCAGAATAAGCTGGCTGACGCCCGCAAACCCCGGTTAATCAGTTGAGTTACCCATCCATAGATTGATTCATTCCCAAGCTCACGTACTGCTGAGTTGCCTCATTCATGCGTTTGCCCAAGACTTGTCAGTCCACAAGAGCGTAACATTCAATTCCAGGCTCTTGCTAACATAAAGTAGCAAACAGCCCAAATCCAACCTTCCAGTTCCGGAAATAAATTCCCAAGAACCATGGGTTGATGAATTTACTGATTCTCAAACAGGCATGCTCTCCGGAATACCAAAGAGCGCAATGTGCGTTCAAAGATTCGATGATTCACTGAATTCTGCAATTCACATTACTTATCGCATTTCGCTGC…	JX043205	SH018671.07FU	423	Fungi	p__Chytridiomycota	c__Chytridiomycetes	o__Rhizophlyctidales	f__Rhizophlyctidaceae	g__Rhizophlyctis	s__Rhizophlyctis_sp	6	320199 Rhizophlyctis_sp	7.28343e-128	0.88	98.3452	0	0	0	0	0	0	0	0	0	0	0	0	0	0	0	0	0	0	0	0	0	0	0	0	0	0	0	0	0	0	0
>a15705	Otu02083	Saprotroph	TTAAGTTCAGCGGGTTTTCCCACCTGATTTGAGACCAAGTGTTCAGTGCGGCGAGGGACTACCATCCCCCTGTGCGCTGATGTAAAAGGTTGGGTCACTCAAGCTCGAGTTCAAACAATACAAAGGCGAATCCAAACGTATTTTAGGGTGCAGAAACACTCTTTCATGCGCTTGAAACCTGAGACTGCGTCCTACGATTTCGTGACATTGATTTTCGAGACACTGCCCCGTGCTGGGAGGCAGACGTCTCACATCCGACGGTCAACCTCGAGCCTTGCGACCCGAAAGTGACGTCGATGGAGTTTACTGATTCTCAAACAGGCGTGCTCCCCGGAATACCAGGGAGCGCAATGTGCGTTCAAAGATTCGATGATTCACTGAATTCTGCAATTCACATTA…	EU379226	SH190713.07FU	441	Fungi	p__Chytridiomycota	c__Chytridiomycetes	o__Rhizophlyctidales	f__Rhizophlyctidaceae	g__Rhizophlyctis	s__Rhizophlyctis_sp	5	296927 Rhizophlyctis_rosea	1.03403e-66	0.77	86.3946	0	0	0	0	0	0	0	0	0	0	0	0	0	0	0	0	0	0	0	0	0	0	0	0	0	0	0	0	0	0	0
>a127233	Otu03979	Saprotroph	TTAAGTTCAGCGGGTTTTCCTACCTGATTTGAGACCAAGTGTTCAAAGAAGGGTGACTGACGTCATCCAACTCTGGATAATGGTTGAGTTACCAAGTCCAATCAAACCGACAATTCCTTAAGAACAGACGTACTTGTGAGTTGCCTCATTCATGCGTATGCCCAAGAACTGTTAGTCCAAGGATGCGTAACATTTCATTTCAGGTCATTGAGGCTGTGAAGTCTCAAAAGACCCATATCCAACCGCAATGAAGCAGTTGATGGATTTACTGATTCTCAAACAGGCATGCTCTCCGGAATACCAAAGAGCGCAATGTGCGTTCAAAGATTCGATGATTCACTGAATTCTGCAATTCACATTACTTATCGCATTTCGCTGCGTTCTTCATCGATGACGAGT…	EU379203	SH202562.07FU	403	Fungi	p__Chytridiomycota	c__Chytridiomycetes	o__Rhizophlyctidales	f__Rhizophlyctidaceae	g__Rhizophlyctis	s__Rhizophlyctis_sp	2	302120 Rhizophlyctis_rosea	1.23678e-137	0.96	88.5856	0	0	0	0	0	0	0	0	0	0	0	0	0	0	0	0	0	0	0	0	0	0	0	0	0	0	0	0	0	0	0
>a3527	Otu01318	Unclassified	TTAAGTTCAGCGGGTTTTCCTGCCTGATTTCAGACCAAGTTATGAAGTTTTGTTTGAGTCGACCTGAATATCCGCGTCTGGATAGCAATTCCAAAGGGTAATAGATGATTTCTGTTGCACTTTGTAATACCAACCACCAGCAGATTGCAGTAGTACAGACAATTGTTTTTTAGATGATTGCAGTAACAAGTTACAAACAAATCATCCAACATCCTCCTTTTCTATGCAAAAAGATTTCCACCTTTTTCCACAAGGAGACATTTTTTATGATTCTGAAACGGGCATGCTCTCCGGGATACCAGAGAGCGCAATGTGCGTTCAAAGATTCGATGATTCACTGAATTCTGCAATTCACACTACTTATCGCATTTCGCTGCGTTCTTCATCGTTGACGAGTCT…	FJ827723	SH202525.07FU	401	Fungi	p__Chytridiomycota	c__Chytridiomycetes	o__unidentified	f__unidentified	g__unidentified	s__Chytridiomycetes_sp	367	302105 Chytridiomycetes_sp	4.85114e-49	0.77	77.0574	0	0	0	0	0	0	0	0	0	0	0	0	0	0	0	0	0	0	0	0	0	0	0	0	0	0	0	0	0	0	0
>a134066	Otu01538	Unclassified	TTAAGTTCAGCGGGTAATCCTGCCTGATTTGAGACCATGGTTCAAAAAGATTATTTTCATCAAACAATTGATTTTTTACATCAAAGTTTGGTTATTCATAAAAACTTTTTCATAGGTTTTGAGAACTTGGATTTTATTAAACAGCTTATTCTGTATAGGGAGAAACGAAAAAGTTCCATTCAAATACTTTTCAGCCAAGATTAATTACCAAGCTATGTAATTAATAGAACTCTAAAAAAAAAAGCTTAGAGATTCCACAAATCTTTCCTATATAAAATAAAATTATATATAGGAAAAAGAATACATTAGATTCTCAAACAGGCATACTCTACCGAAATAGAGTGCAATGTGCGTTCAAAGATTTGATGATTCACGGAATTCTGCAATTCACATTACGTA…	DQ485617	SH210135.07FU	437	Fungi	p__Chytridiomycota	c__Chytridiomycetes	o__unidentified	f__unidentified	g__unidentified	s__Chytridiomycetes_sp	82	305197 Operculomyces_laminatus	4.38029e-56	0.7	98.627	0	0	0	0	0	0	0	0	0	0	0	0	0	0	0	0	0	0	0	0	0	0	0	0	0	0	0	0	0	0	0
>a23830	Otu01549	Unclassified	TTAAGTTCAGCGGGTAGTCTTGTCTGATTCGAGATCAAGTCTTAAAGGTGGTTAGCCTTCGTAAGGTTTTGTGTTGACTCCAAAACTAGCTTGAAAATACTAGCGACACTGCAAGGACGAATCCATTGGTCATGCCATTCATATAGTCTCGTTAGAGTCAGGCAACAAATGCTATTAGAGTCTCTGTATCCAGAAATCTCAAGTCCAAACCGTATAGCTTTTACCCTATAGGTTTGATGGTTAAACTGATTCTCGAACAGGCATGCCCTTAGGAATACCAGAGGGCGCAATGTGCGTTCAAAGATTTAATGATTCACGGAATTCTGCAATTCACATTACTTATCGCATTTCGCTGCGTTCTTCATCGATGACGAGTCTAG	EU480016	SH026332.07FU	380	Fungi	p__Chytridiomycota	c__Chytridiomycetes	o__unidentified	f__unidentified	g__unidentified	s__Chytridiomycetes_sp	59	324062 Chytridiomycetes_sp	1.17749e-106	0.86	98.4211	0	0	0	0	0	0	0	0	0	0	0	0	0	0	0	0	0	0	0	0	0	0	0	0	0	0	0	0	0	0	0
>a88272	Otu01696	Unclassified	TTAAGTTCAGCGGGTAATCCTGCCTGATTTGAGACCATGGTTCAAAAAAGATTTTAAAACTTTCGCAAGTAAAAATCTTTTTTATAGGTTAATATAACCAGGTTTTAACTTGATTTTAAACAACTTAATCTGTATAGGGAGAAACATTAAAAGTTTCATTCAAATACTTTTCAGTCAAGATTTATTATCAAGCTTATATAATTAATAAAACTCTAAAAGAAGAGATTTTACAAATCTTTCCTTCCTTCTTATATAAAAAAAAATAAATTTTTATTAAATAAAAAAAAAAAAGAAAAAGAATACATAAGATTCTCAAACAGGCATACTCTACCGAAATAGAGTGCAATGTGCGTTCAAAGATTTGATGATTCACGGAATTCTGCAATTCACATTACGTAT…	EF585653	SH024789.07FU	436	Fungi	p__Chytridiomycota	c__Chytridiomycetes	o__unidentified	f__unidentified	g__unidentified	s__Chytridiomycetes_sp	31	323273 Rhizophydium_sp_ARG035	1.67389e-64	0.74	98.6239	0	0	0	0	0	0	0	0	0	0	0	0	0	0	0	0	0	0	0	0	0	0	0	0	0	0	0	0	0	0	0
>c59202	Otu01947	Unclassified	TTAAGTTCAGCGGGTAGTCTTGTCTGATTCGAGATCAAGTCTTAAAGCGTTAGCTTCGTAATATTTAATGTTTTCCAGAGCCGATTCAAAGATACTAGCAGCAATACAAGAACTTTCGTTCAATGGTCATGCCTTTCATATAGTCTCATCGAAACTAGGCAACAAATGTTATTAGAGTCTCTGTTTCCAGAAGTCTCAAGTCCAAAGCTATAACTTTTACATTATAGATTTGATGATTAAACTGATTCTCGAACAGGCATGCCCTGAGGAATACCAAAGGGCGCAATGTGCGTTCAAAGATTTAATGATTCACGGAATTCTGCAATTCACATTACTTATCGCAATTCGCTGCGTTCTTCATCGGTGACGAGTCTAG	EU480016	SH026332.07FU	376	Fungi	p__Chytridiomycota	c__Chytridiomycetes	o__unidentified	f__unidentified	g__unidentified	s__Chytridiomycetes_sp	8	324062 Chytridiomycetes_sp	7.08967e-109	0.87	98.4043	0	0	0	0	0	0	0	0	0	0	0	0	0	0	0	0	0	0	0	0	0	0	0	0	0	0	0	0	0	0	0
>c26493	Otu02494	Unclassified	TTAAGTTCAGCGGGTTTTCCTACCTGATTTGAGACCAAGTATTCAATGCGAGGGCCGAAATGAATCAGACCTCCCAGAGATGTAATGGTTGGGTCCAACAGCGCATCTCCCAGACATCAGGAATGAAAGCTTACAAGAGTGAAATCTAAGTTAATTAAAACAGTTCATGCACTCAAAGCCATTCCCCATCAAGAGAAAGCTGCAGACATTGAATTTAAAGTCATTGTGTTCACAGTGAAACGCAAAAGACTCAAATCCACCTCCGAACCTGAGCGAAATTAATCAAACAGATCTGGTGGTGAGAGATTTATTGATTCTCAAACAGGCATGCTCCCCGGAATACCAAGGAGCGCAATGTGCGTTCAAAGATTTGATGATTCACTGAATTCTGCAATTCAC…	GU055563	SH477475.07FU	445	Fungi	p__Chytridiomycota	c__Chytridiomycetes	o__unidentified	f__unidentified	g__unidentified	s__Chytridiomycetes_sp	5	330504 Chytridiomycetes_sp	4.75776e-165	0.95	98.6517	0	0	0	0	0	0	0	0	0	0	0	0	0	0	0	0	0	0	0	0	0	0	0	0	0	0	0	0	0	0	0
>b85624	Otu02642	Unclassified	TTAAGTTCAGCGGGTCTTCCTACCTGATTTGAGACCAAGGTTCAGAGCTCTTTCCTCAAGAGGAAGGAGCACTATAGTTTATGGACCTATAGCTCGATCGACTATTTCCCTAGCAACTTAGTAGGCATTGAGGTTGAAAACCATTCAAATACTGTTCTGTTGTTAAGAGACGTCAGACATCTTCTCGAGGTACAGATAATCTATTTCAAGGCACTCTCCTGAAGGAGAGAAGGCCTCAGATCTTTAGGCATTTTAAAAAAATTCCTAAAAGAAATACTATAGATTCTCAAACAGGCATACTCTACAGAATAGAGTGCAATGTGCGTTCAAAGATTCGATGATTCACGGAAAGCAATTCACATTACGTATCGCATTTCGCTGCGTTCTTCATCGTTGACG…	FJ235869	SH175387.07FU	406	Fungi	p__Chytridiomycota	c__Chytridiomycetes	o__unidentified	f__unidentified	g__unidentified	s__Chytridiomycetes_sp	4	290099 Chytridiomycetes_sp	2.006e-166	0.99	98.5222	0	0	0	0	0	0	0	0	0	0	0	0	0	0	0	0	0	0	0	0	0	0	0	0	0	0	0	0	0	0	0
>c9505	Otu03259	Unclassified	TTAAGTTCAGCGGGTAATCCTACCTGATTTGAGACCATGGTTCAAAAGAATTACTTTTACCAAAAAAATTTGATTACTAATAAAACTTTTACATAGTTATGAACTCAGTCCAAATTGCCTAGTCAGTACAGGGAGAAACTAAAAGTTCCATTCAAATACTTTTCTGCAATTTGTTTTTAATAGAAATAAATTCCTATAATTAAACCGAGCTATATAATTAATAGAACTCTATGACATAAGCATAGAGATTCTACAAATCTCTCCTAATGTACAAAGACCTTAGGAAAAAGAATACATTAGATTCTCAAACAGGCATACTCTACCGAAATAGAGTGCAATGTGCGTTCAAAGATTTGATGATTCACGGAATTCTGCAATTCACATTACGTATCGCATTTC…	DQ485617	SH210135.07FU	428	Fungi	p__Chytridiomycota	c__Chytridiomycetes	o__unidentified	f__unidentified	g__unidentified	s__Chytridiomycetes_sp	3	305197 Operculomyces_laminatus	1.68894e-68	0.73	98.5981	0	0	0	0	0	0	0	0	0	0	0	0	0	0	0	0	0	0	0	0	0	0	0	0	0	0	0	0	0	0	0
>c140638	Otu03035	Unclassified	TTAAGTTCAGCGGGTTTTCTTGCTCGATTTCAGACCAAGTTGTCAGAGCCGGTTAAGCATAACTGCTTGTTGGCCCTGTGTTGTTTACGGATGCGTGTTCTCTCGGTGGCTGACGAAGTGTATCATAAGCTGTTGCACTTGTCCGGGCATCACCGCATTCAGTCACGCACTCTAACTTTAAGGCAATTGACAAAGACAAATTGCGCAGAGCTGCTGGCGAACCAACAACAACCCCACGGTCTGTGAGTTTTTTAATGATTCTGAAACGAGCATGCTCCGCGGAATACCACGAAGCGCAATGTGCGTTCAAAGATTCGATGATTCACTGAATTCTGCAATTCACACTACTTATCGCATTTCGCTGCGTTCTTCATCGATGACGAGTCTAG	GQ499378	SH196352.07FU	389	Fungi	p__Chytridiomycota	c__Chytridiomycetes	o__unidentified	f__unidentified	g__unidentified	s__Chytridiomycetes_sp	2	299521 Spizellomyces_pseudodichotomus	2.94206e-55	0.73	98.4576	0	0	0	0	0	0	0	0	0	0	0	0	0	0	0	0	0	0	0	0	0	0	0	0	0	0	0	0	0	0	0
>a4304	Otu01286	Unclassified	TTAAGTTCAGCGGGTAATCCTACCTGATTTGAGATTGAGTTTATTTCGTTCGTCGTTTACTCGAACAATTGAACACCGTCTCCCATAATTCGGCATTCAAAAACTTCCCGCTTAACAGGTCTACGTGGTCCGAGGAGAATAGAGGTCACCTTTTCAGGCTCACATATTACTCCAAGTTCGCAAACGTGGCGGTACTATTGCATTTTAAAACACTCGGCAATGAATTGTCGAGAAGTCTCAACTGAGGGTTCTTAACGTTCTTTTTTATATCTTTAAAGGAAGACTCTCATTTAGGCCAATACTCAAACAGGCATGCTCTCCGGAATGCCAGAGAGCGCAATATGCGTTCAAAGATTCGATGATTCACTGAATTCTGCAATTCACATTACTTATCGCATT…	AY997067	SH216672.07FU	430	Fungi	p__unidentified	c__Chytridiomycetes	o__Olpidiales	f__Olpidiaceae	g__Olpidium	s__Fungi_sp	625	307909 Olpidium_brassicae	1.19361e-156	0.99	89.3023	49	2	2	6	49	7	42	0	0	30	92	8	74	0	5	92	30	3	40	2	0	3	5	0	2	0	0	0	3	5	6
>a26637	Otu01372	Unclassified	TTAAGTTCAGCGGGTTTTCCTACCTGATTTGAGACCAAGTTTTTGGAAGACACACCAACAGGGATGCATCCACCAATGTAATGGTTGGGTACACAACAAGTGAGCCTTTGAACAAAACACCATCGTGAGGATCAAGTTCTTTCAAACTCCATTCATGCACTCTGGGCTTTGTTGAGGACAACAAGAGCTGTAGACATTTCATTTAAGATCATTGTAGACTCGGAGATCCACAAACGATCCAGATCCACAGAGGCGCACCTCCCAACTTTGACTGTTCCAAAGAGGGAGGGACATGTGAGGGTTTTATCGATTCTCAAACAGGCATGCTCTCCGGAATACCAGAGAGCGCAATGTGCGTTCAAAGATTTGATGATTCACTGAATTCTGCAATTCACATTA…	AB520602	SH190558.07FU	441	Fungi	p__unidentified	c__Chytridiomycetes	o__unidentified	f__unidentified	g__unidentified	s__Fungi_sp	234	296856 Chytridiomycetes_sp	6.70595e-178	0.98	98.6395	0	0	0	0	0	0	0	0	0	0	0	0	0	0	0	0	0	0	0	0	0	0	0	0	0	0	0	0	0	0	0
>a56266	Otu01621	Unclassified	TTAAGTTCAGCGGGTAATCCTACCTGATTTGAGCTTGAATTTTTAAGTTCGTCGTTACTCGAACAATTGAATGCCGCCTTTGACGTTCAGCAATCAAAAACTTCCAGCAACAAGTCTTCCCAACGAGGAGAAATAGAGTTACCCTTTCAGGTCACATATTACTCCAAAGAGGGTGAGCTATAGCTGTACTATTGTATTTTAAGACACTTAACAATTTTACTTATCAAGACGTCTCAATGCAGTTTTTTATAAAAAGTTCTATCCTTAATACAAAGGTTACACCAGATTGGTACCAAGACTCAAACAGGCATGCTCTCCGGAATGCCGGAGAGCGCAATATGCGTTCAAAGATTCGATGATTCACTGAATTCTGCAATTCACATTACTTATCGCATTTCG…	AY373015	SH194417.07FU	427	Fungi	p__unidentified	c__Chytridiomycetes	o__Olpidiales	f__Olpidiaceae	g__Olpidium	s__Fungi_sp	52	298612 Olpidium_brassicae	2.26012e-174	0.99	97.8923	0	0	0	0	0	0	0	0	0	0	0	0	0	0	0	0	0	0	0	0	0	0	0	0	0	0	0	0	0	0	0
>a115424	Otu01753	Unclassified	TTAAGTTCAGCGGGTTTTCTTACCCGATTTCAGACCAAGTTAAACAGATGCAGCTCCAAGGAACTACCGCTGGTATAATTGTATTCTGCATACCGAGCAGCACTGCTGTGTTCACCGTTCACAAGCGAATAGAAAAATCTGTTGCACTTGATTGACCGGCAAAAGAGCCGAACTGCAGCACGCAAATGAATTCCAGGCGATTGCGCAACTACACCCGAAAGTGTAAATGCTCAAAAAGACGCCCATATCCACCTGCTCAGATTGCTTCATTACAAAGCAAAGAGAGCTTGTGAGAATTTAATGGTACTGAAACGGGCATGCTCCCCGGAATACCAGGGAGCGCAAGGTGCGTTCAAAGATTCGATGATTCACTATATTCTGCAATTCACACTACGTATC…	GQ499377	SH001925.07FU	435	Fungi	p__unidentified	c__Chytridiomycetes	o__Spizellomycetales	f__Spizellomycetaceae	g__Kochiomyces	s__Fungi_sp	34	312472 Kochiomyces_sp_JEL_371	3.78745e-172	0.97	98.6207	0	0	0	0	0	0	0	0	0	0	0	0	0	0	0	0	0	0	0	0	0	0	0	0	0	0	0	0	0	0	0
>b71465	Otu02233	Unclassified	TTAAGTTCAGCGGGTTTTCCTACCTGATTTGAGACCAAGTTTTTGGAAGACACACCAACAGGGATGCATCCACCAATGTAATGGTTGGGTACACAACAAGTGAGCCTTTGAACAAAACACCATCGTGAGGATCAAGTTCTTTCAAACTCCATTCATGCACTCTGGGCTTTGTTTAGGACAACAAGAGCTGTAGACATTTCATGTAAGAGTTTTATCGATTCTCAAACAGGCATGCTCTCCGGAATACCAGGGAGCGCAATGTGCGTTCAAAGATTTGATGATTCACTGAATTCTGCAATTCACATTACTTATCGCAATTCGCTGCGTTCTTCATCGTTGACGAGTCTAG	AB520602	SH190558.07FU	349	Fungi	p__unidentified	c__Chytridiomycetes	o__unidentified	f__unidentified	g__unidentified	s__Fungi_sp	4	296856 Chytridiomycetes_sp	1.46233e-80	0.95	63.0372	0	0	0	0	0	0	0	0	0	0	0	0	0	0	0	0	0	0	0	0	0	0	0	0	0	0	0	0	0	0	0
>b141507	Otu02437	Unclassified	TTAAGTTCAGCGGGTAGTCTTGTCTGATTTGAGATCAAGTCTTAAAAAGGTTTCCCTCTTTGTGTACTATTTTTGGCTCCTTGCACCATCTTCCACAACTCTAGTAAGCAATCAATGAACTTGCGTTCTTGGTCATGCCGTTGAGCTGATTCAAACAGTGGTCAAAGCAACAAATGTCTTCAAGGTCAGTCTAGAGCAAATCTAGACAAGTCCCAAATCCACTCTCCAATTTAGTTGCCCAAACAAGAAGTGATAATTAAACTGATTCTCAAACAGACATGCCTATCGGAATACCAATAGGCGCAATGTGCGTTCAAAGATTTAATGATTCACGGAATTCTGCAATTCACATTACTTATCGCATTTCGCTGCGTTCTTCATCGGTGACGAGTCTAG	JQ666698	SH030110.07FU	396	Fungi	p__unidentified	c__Chytridiomycetes	o__unidentified	f__unidentified	g__unidentified	s__Fungi_sp	4	325903 Chytridiomycetes_sp	5.7349e-73	0.77	98.4848	0	0	0	0	0	0	0	0	0	0	0	0	0	0	0	0	0	0	0	0	0	0	0	0	0	0	0	0	0	0	0
>c157279	Otu02529	Unclassified	TTAAGTTCAGCGGGTCCTCTTGCCTGATTTGAGATCAAGTAATTTTAGGATTGCTCCTGAAGTAATGGGGAAGCACAGCTGTCACATCCATGGTATTTCACCAGACTTGCAAAGTGTTAAAGTATTTCTACATTATATCTTTGGGTCAGGGAACCGTGGAAGGTGCCAAACAATCAATTTCAAGGTGAATTGCTCCAAGGTTGTACACTGGAGACAAATCATCTCAAATCCAGCCCAAATTCAAAAGAGCTTGGGGTGATAGGTTTTATCGATTCTCAAACAGGCATGCTTTCCGGAATACCAGAAAGCGTAATGTACGTTCAAAGATTTGATGATTCACTGAATTCTGCAATTCACATTACTTATCGCATTTCGCTGCGTTCTTCATCGATGACGAGT…	EU379236	SH202088.07FU	403	Fungi	p__unidentified	c__Chytridiomycetes	o__Rhizophlyctidales	f__Rhizophlyctidaceae	g__Rhizophlyctis	s__Fungi_sp	2	301907 Rhizophlyctis_rosea	8.00332e-47	0.8	58.8089	0	0	0	0	0	0	0	0	0	0	0	0	0	0	0	0	0	0	0	0	0	0	0	0	0	0	0	0	0	0	0
>b43034	Otu02679	Unclassified	TTAAGTTCAGCGGGTAGTCTTGTCTGATTCGAGATCAAGTCTTAAAGAGTTTTTAGCTCTTCGTGAAATTTCTGTACGACATCAAAAGCTTAAAGATACTAGTTGCAATCATAAGAACTTGCGTTCAATGGTCATGCCTTTCATATAATCTCGCTAGAGATGGGCAACAAATGTAATTAGGGTCTCTCTATCGAGAAGTCCCAAGTCCAAACATACTATGTTTCCACAATAGGTTTGATGGTTAAACTGATTCTCGAACAGGCATGCCTTGAGGAATACCAAAAGGCGCAATGTGCGTTCAAAGATTTAATGATTCACGGAATTCTGCAATTCACATTACTTATCGCATTTCGCTGCGTTCTTCATCGATGACGAGTCTAG	JQ666698	SH030110.07FU	381	Fungi	p__unidentified	c__Chytridiomycetes	o__unidentified	f__unidentified	g__unidentified	s__Fungi_sp	2	325903 Chytridiomycetes_sp	8.38079e-129	0.92	98.4252	0	0	0	0	0	0	0	0	0	0	0	0	0	0	0	0	0	0	0	0	0	0	0	0	0	0	0	0	0	0	0
>a87415	Otu02981	Unclassified	TTAAGTTCAGCGGGTAATCCTACCTGATTTGAGATTGAGTTTATTTCGTTCGTCGTTTACTCGAACAATTGAACACCGTCTCCCATAATTCGGCATTCAAAAACTTCCCGCTTAACAGGTCTACGTGGTCCGAGGAGAATAGAGGTCACCTTTTCAGGCTCACATATTACTCCAAGTTCGCAAACGTGGCGGTACTATTGCATTGTAGAGAAGTCGCAACTGAGGGTTCTTAACGTTCTTTTTTATATCTTTAAAGGAAGACTCTCATTTAGGCCAATACTCAAACAGGCATGCTCTCCGGAATGCCAGAGAGCGCAATATGCGTTCAAAGATTCGATGATTCACTGAATTCTGCAATTCACATTACTTATCGCATTTCGCTGCGTTCTTCATCGTTGA…	AY997067	SH216672.07FU	408	Fungi	p__unidentified	c__Chytridiomycetes	o__Olpidiales	f__Olpidiaceae	g__Olpidium	s__Fungi_sp	2	307909 Olpidium_brassicae	2.44317e-124	0.92	88.7255	0	0	0	0	0	0	0	0	0	0	0	0	2	0	0	0	0	0	0	0	0	0	0	0	0	0	0	0	0	0	0
>a701	Otu03359	Unclassified	TTAAGTTCAGCGGGTAATCCTACCTGATTTGAGATTGAGTTTATTTCGTTCGTCGTTTACTCGAACAATTGAACACCGTCTCCCATAATTCGGCATTCAAAAACTTCCCGCTTAACAGGTCTACGTGGTCCGAGGAGAATAGAGGTCACCTTTTCAGGCTCACATATTACTCCAAGTTCGCAAACGTGGCGGTACTATTGCATTTTAAAAGACTCGGCTGTGGGTTCTTAACGTTCTTTTTTATATCTTTAAAGGAAGACTCTCATTTAGGCCAATACTCAAACAGGCATGCTCTCCGGAATGCCAGAGAGCGCAATATGCGTTCAAAGATTCGATGATTCACTGAATTCTGCAATTCACATTACTTATCGCATTTCGCTGCGTTCTTCATCGGTGACG…	AY997067	SH216672.07FU	406	Fungi	p__unidentified	c__Chytridiomycetes	o__Olpidiales	f__Olpidiaceae	g__Olpidium	s__Fungi_sp	2	307909 Olpidium_brassicae	3.98444e-122	0.92	88.67	0	0	0	0	0	0	0	0	0	0	0	0	0	0	0	2	0	0	0	0	0	0	0	0	0	0	0	0	0	0	0
>a5226	Otu03973	Unclassified	TTAAGTTCAGCGGGTAATCCTACCTGATTTGAGATTGAGTTTATTTCGTTCGTCGTTACTCGAACAATTGAACACCGTCTCCCATAATTCGGCATTCAAAAACTTCCCGCTTAACAGGTCTACGTGGTCCGAGGAGAATAGAGGTCACCTTTTCAGGCTCCCATATTATTGCATTTTAAAACACTCGGCAATGAATTGTCGAGAAGTCTCAACTGAGGGTTCTTAACGTTCTTTTTTATGTCTTTAAAGGAAGACTCTCATTTAGGCCAATACTCAAACAGGCATGCTCTCCGGAATGCCGGAGAGCGCAATATGCGTTCAAAGATTCGATGATTCACTGAATTCTGCAATTCACATTACTTATCGCATTTCGCTGCGTTCTTCATCGTTGACGAGTCT…	AY997067	SH216672.07FU	401	Fungi	p__unidentified	c__Chytridiomycetes	o__Olpidiales	f__Olpidiaceae	g__Olpidium	s__Fungi_sp	2	307909 Olpidium_brassicae	8.12543e-117	0.91	88.5287	2	0	0	0	0	0	0	0	0	0	0	0	0	0	0	0	0	0	0	0	0	0	0	0	0	0	0	0	0	0	0
>b37233	Otu04017	Unclassified	TTAAGTTCAGCGGGTTTTCCTACCTGATTTGAGACCAAGTTTTTGGAAGACACACCAACAGGGATGCATCCACCAATGTAATGGTTGGGTACACAACAAGTGAGCCTTTGAACAAAACACCATCGTGAGGATCAAGTTCTTTCAAACTCCATTCATGCACTCTGGGATTTGTTGAGGTCAACAAACGCTGCAGATCCACAGAGGCGCACCTCCCAACTTTGACTGTTCCAAAGAGGGAGGGACATGTGAGGGTTTTATCGATTCTCAAACAGGCATGCTCTCCGGAATACCAGAGAGCGCAATGTGCGTTCAAAGATTTGATGATTCACTGAATTCTGCAATTCACATTACTTATCGCAATTCGCTGCGTTCTTCATCGTTGACAAGTCTAG	AB520602	SH190558.07FU	392	Fungi	p__unidentified	c__Chytridiomycetes	o__unidentified	f__unidentified	g__unidentified	s__Fungi_sp	2	296856 Chytridiomycetes_sp	3.56148e-79	0.98	53.0612	0	0	0	0	0	0	0	0	0	0	0	0	0	0	0	0	0	0	0	0	0	0	0	0	0	0	0	0	0	0	0
>c1677	Otu04151	Unclassified	TTAAGTTCAGCGGGTTTTCCTACCTGATTTGAGACCAAGTTTTTGGAAGACACACCAACAGGGATGCATCCACCAATGTAATGGTTGGGTACACAACAAGTGAGCCTTTGAACAAAACACCATCGTGAGGATCAAGTTCTTTCAAACAAGATCATTGTAGACTCGGAGATCCACAAACGATCCAGATCCACAGAGGCGCACCTCCCAACTTTGACTGTTCCAAAGAGGGAGGGACATGTGAGGGTTTTATCGATTCTCAAACAGGCATGCTCTCCGGAATACCAGAGAGCGCAATGTGCGTTCAAAGATTTGATGATTCACTGAATTCTGCAATTCACATTACTTACCGCAATTCGCTGCGTTCTTCATCGGTGACGAGTCTAG	AB520602	SH190558.07FU	384	Fungi	p__unidentified	c__Chytridiomycetes	o__unidentified	f__unidentified	g__unidentified	s__Fungi_sp	2	296856 Chytridiomycetes_sp	1.73186e-88	0.96	62.2396	0	0	0	0	0	0	0	0	0	0	0	0	0	0	0	0	0	0	0	0	0	0	0	0	0	0	0	0	0	0	0
>a30649	Otu01349	Unclassified	TTAAGTTCAGCGGGTTTTCTTACCCGATTTCAGACCAAGTTAAACAGATGCAGCTCCAAAAAGAGAACTACAGCTGGTATAATTGTATTCTGCCTACCGAGCAGCACTGCTACTATCACCGTGGTCAAGCGAATAGAAAAATCTGTTGCACTTGATTGACCGGCAAAAGAGCCGAACTGCAGCACGCAAATGAATTCCAGGCGATTTGTGCAACACAACACCCGAAAGTGCTGTATGCCCAAAAAACGCCCATATCCACCTGCTCAAAATGCTTCATTACAAAGCAAAGAGAGCTTGTGAGAATTTAATGGTACTGAAACGGGCATGCTCCCCGGAATACCAGGGAGCGCAAGGTGCGTTCAAAGATTCGATGATTCACTATATTCTGCAATTCACACT…	GQ499377	SH001925.07FU	442	Fungi	p__Chytridiomycota	c__Chytridiomycetes	o__Spizellomycetales	f__Spizellomycetaceae	g__Kochiomyces	s__Kochiomyces_sp	317	312472 Kochiomyces_sp_JEL_371	1.19529e-152	0.93	98.6425	0	0	0	0	0	0	0	0	0	0	0	0	0	0	2	0	0	0	0	0	0	0	0	0	0	0	0	0	0	0	0
>a7072	Otu01485	Unclassified	TTAAGTTCAGCGGGTTTTCTTACCCGATTTCAGACCAAGTTAAACAGATGCAGCTCCAAAGAACTACAGCTGGTATAATTGTATTCTGCATACCGAGCAGCACTGCTATGTTTACCGTTCACAAGCGAATAGAAAAATCTGTTGCACTTGATTGACCGGCAAAAGAGCCGAACTGCAGCACGCAAATGAATTCCAGGCGATTGTGCGACTACACCCAAAAGTGTAAATGCTCAAAAAACACCCATATCCACCTGCTCAAATTGCTTCATTACAAAAGCAAAAAGAGCTTGTGAGAATTTAATGGTACTGAAACGGGCATGCTCCCCGGAATACCAGGGAGCGCAAGGTGCGTTCAAAGATTCGATGATTCACTATATTCTGCAATTCACACTACGTATC…	DQ421281	SH177016.07FU	435	Fungi	p__Chytridiomycota	c__Chytridiomycetes	o__Spizellomycetales	f__Spizellomycetaceae	g__Kochiomyces	s__Kochiomyces_sp	112	290840 Kochiomyces_sp	1.01895e-167	0.96	98.6207	0	0	0	0	0	0	0	0	0	0	0	0	0	0	0	0	0	0	0	0	0	0	0	0	0	0	0	0	0	0	0
>b54737	Otu01747	Unclassified	TTAAGTTCAGCGGGTTTTCTTACCCGATTTCAGACCAAGTTAAACAGATGCAGCTCCAAAGAACTACAGCTGGTATAATTGTATTCTGCATACCGAGCAGCACTGCCATATTTACCGTTCACAAGCGAATAGAAAAATCTGTTGCACTTGATTGACCGGCAAAAGAGCCGAACTGCAGCACGCAAATGAATTCCAGGCGATTGCGCAACTACACCCAAAAGTGTAGCTACTCAAAAAGCGCCCATATCCACCCGCTCAGATTGCTTCATTACAAAGCAAAAAGAGCTTGTGAGAATTTAATGGTACTGAAACGGGCATGCTCCCCGGAATACCAGGGAGCGCAAGGTGCGTTCAAAGATTCGATGATTCACTATATTCTGCAATTCACACTACGTATCG…	DQ421281	SH177016.07FU	434	Fungi	p__Chytridiomycota	c__Chytridiomycetes	o__Spizellomycetales	f__Spizellomycetaceae	g__Kochiomyces	s__Kochiomyces_sp	31	290840 Kochiomyces_sp	6.58338e-178	0.99	98.6175	0	0	0	0	0	0	0	0	0	0	0	0	0	0	0	0	0	0	0	0	0	0	0	0	0	0	0	0	0	0	0
>b102661	Otu02068	Unclassified	TTAAGTTCAGCGGGTAGTCTTATTTGATTTGAGATCTAGTCTTAAAAAAAATTTAAAATTTTCTTTGTGTTATATTTTTTTTATGTTACTCTTTAAATTAACTTCCATTAAACAATCAAAGAACTTAAAAAGTCCTATTGGTCATGCTTTTGGTTGTCAATAAAGTCAACAAATAATTTACAAGTCATTCCAAATTTTAATTAAAAAATTAGAAAAGTCTCAAATCCAAAAAATAAATTTTTAAAAAAAATTTAGATTTTGATGATTTACTGATTCTCAAACAAACATACTCTTCGGAATACCAAAGAGTGCAATGTGCGTTCAAAGATTTAATGATTCACGGAATTCTGCAATTCACATTACTTATCGCATTTCGCTGCGTTCTTCATCGATGACGAG…	EU352772	SH471490.07FU	404	Fungi	p__Chytridiomycota	c__Chytridiomycetes	o__Lobulomycetales	f__Lobulomycetaceae	g__Lobulomyces	s__Lobulomyces_sp	8	329675 Lobulomyces_sp_JEL178	7.56222e-140	0.94	98.5149	0	0	0	0	0	0	0	0	0	0	0	0	0	0	0	0	0	0	0	0	0	0	0	0	0	0	0	0	0	0	0
>b136138	Otu02161	Unclassified	TTAAGTTCAGCGGGTAGTCTTATTTGATTTGAGATCTAGTCTTAAAAAAAATTAAAAAATTTTTTTTGTGTTATAATTTTTTTTATGTTACTCTTTTAATTTAACTTCCATTAAAAACAATCAAAGAACTTAAAAAAGTCCTATTGGTCATGCTTTTTGGTTGTCAATAAAGTCAACAAATAATTTACAAGTCATTCCAAAATTTTAATTAAAAAATTTAGAAAAGTCTCAAATCCAAAAAAATAAATCCTTTTTTTAAAAAAAAAATTTAGATTTTGATGATTTACTGATTCTCAAACAAACATACTCTTCGGAATACCAAAGAGTGCAATGTGCGTTCAAAGATTTAATGATTCACGGAATTCTGCAATTCACATTACTTATCGCATTTCGCTGCGT…	EU352772	SH471490.07FU	421	Fungi	p__Chytridiomycota	c__Chytridiomycetes	o__Lobulomycetales	f__Lobulomycetaceae	g__Lobulomyces	s__Lobulomyces_sp	5	329675 Lobulomyces_sp_JEL178	5.62939e-162	0.97	98.5748	0	0	0	0	0	0	0	0	0	0	0	0	0	0	0	0	0	0	0	0	0	0	0	0	0	0	0	0	0	0	0
>a20597	Otu01279	Unclassified	TTAAGTTCAGCGGGTAATCCTACCTGATTTGAGACCATGGTTCAAAAAATAAATCTAACGATCTACTTTTTTAATGGTTATGGGCATTATCTTTTATAGAAAACTAATCTCTCTCTGCGTAATTTGTATAAGGAGAACTGGTAGGTTCATTCAAATACATTTCTGCAAAGTTTTTATAGAGAGTTCAAACATTGACTATAAAAAAAATGACTATAGATTTAACAGAATTGGGTTTTTTAATGACCCAAAATCCGCAAAACTTTCCCATATAAAATTAAAAATCTTATAGAGAAAAAGAATACTATAGATTCTCAAACAGGCATACTCTGCGTAAACAGAGTGCAATGTGCGTTCAAAGATTTGATGATTCACGGAATTCTGCAATTCACATTACGTATC…	DQ485617	SH210135.07FU	435	Fungi	p__unidentified	c__Chytridiomycetes	o__Rhizophydiales	f__Incertae_sedis	g__Operculomyces	s__Operculomyces_sp	770	305197 Operculomyces_laminatus	2.30911e-174	0.98	98.6207	0	0	0	0	0	0	3	0	0	0	0	0	0	0	0	0	0	0	3	0	0	0	0	0	0	5	0	0	0	0	0
>a32949	Otu01283	Unclassified	TTAAGTTCAGCGGGTAATCCTACCTGATTTGAGACCATGGTTCAAAAAGTCAACCTTACGATTCACTTTTTTAATGGTTATGGGCATTATTTTCTATAGAAAACTAATCTCTCTCTGCGTAATTTGTATAAGGAGAACTGGTAGGTTCATTCAAATACATTTCTGCAAAGTTTTTATAGAGAGTTCAAACATTGACTATAAAAAAAATGACTATAGATTTAACAGAATTGGGTATTTTTAATAACCCAAAATCCGCAAAACTTTCCCATATAAAATTAAAAACTTTATAGAGAAAAAGAATACTATAGATTCTCAAACAGGCATACTCTGCGCAAACAGAGTGCAATGTGCGTTCAAAGATTTGATGATTCACGGAATTCTGCAATTCACATTACGTAT…	DQ485617	SH210135.07FU	436	Fungi	p__unidentified	c__Chytridiomycetes	o__Rhizophydiales	f__Incertae_sedis	g__Operculomyces	s__Operculomyces_sp	566	305197 Operculomyces_laminatus	2.17893e-166	0.96	98.6239	0	0	0	0	0	0	0	0	0	0	0	0	0	2	0	0	0	0	0	0	0	0	0	0	0	0	0	0	0	0	0
>a128094	Otu01686	Unclassified	TTAAGTTCAGCGGGTAATCCTACCTGATTTGAGACCATGGTTCAAAAAAAAATCAATCGACTTTTTTTTTAATGGTTATGAGCATTCTTTTAATAGAAAACTAATTTCTCTTTGCTTAATTTGTATAGGGAGAACTGGTAGGTTCATTCAAATACATTTCTGCAAAGTTTTTTATAGAAACTTCAAACATTTTACTATAAAAACAATGACTATAGATTTAACAGAATTGGTTTGACCCAAAATCCGCAAAACTTTCCCAAATTTTAACGAATCAAAATTGGGAAAAAGAATACTATAGATTCTCAAACAGGCATACTCTGCGCAAACAGAGTGCAATATGCGTTCAAAGATTTGATGATTCACGGAATTCTGCAATTCACATTACGTATCGCATTTCGC…	DQ485617	SH210135.07FU	426	Fungi	p__Chytridiomycota	c__Chytridiomycetes	o__Rhizophydiales	f__Incertae_sedis	g__Operculomyces	s__Operculomyces_sp	34	305197 Operculomyces_laminatus	5.82141e-131	0.89	98.5915	0	0	0	0	0	0	0	0	0	0	0	0	0	0	0	0	0	0	0	0	0	0	0	0	0	0	0	0	0	0	0
>c111637	Otu02113	Unclassified	TTAAGTTCAGCGGGTAATCCTACCTGATTTGAGACCATGGTTCAAAACATGAAAAACCAAAAAACTTTTGCAAGTTGAAGGTTTCTTTTTGTTTTATATGGTTATGAACCCAATTCACTATAGAAAACTATTCTCTCTTTGCGTAATTAGTATAGGGAGAACTGAAAGTTCATTCAAATACTTTTCGACAAAGTTTTTATAGAAAAGTCATCATTTTCTAAAGTAAACTAAGCTATAGATTTAATAGAACCATAATAACATATAAAATGGATTCTACAAAACTTTTCAAATTACTAAACCACTTTTGCAAGTGGAAGGTAATTTAAAAAAAGAATACTATAGATTCTCAAACAGGCATACTCTACGTGAATAGAGTGCAATGTGCGTTCAAAGATTTGA…	DQ485617	SH210135.07FU	469	Fungi	p__Chytridiomycota	c__Chytridiomycetes	o__Rhizophydiales	f__Incertae_sedis	g__Operculomyces	s__Operculomyces_sp	8	305197 Operculomyces_laminatus	1.17904e-74	0.76	98.9339	0	0	0	0	0	0	0	0	0	0	0	0	0	0	0	0	0	0	0	0	0	0	0	0	0	0	0	0	0	0	0
>d105483	Otu02422	Unclassified	TTAAGTTCAGCGGGTTTTCTTGCCCGATTTCAGACCAAGTTATCAGAAACCATACACATTGGTATATAGAGTCTGTATAATAACGTTTGGTTACATACACCAAAGTACATCCTTAAGTACCAAAGAGAATAGATATAATCTGTTGCACTTTAGAGTCCCAAAAGACATACGCAATTGGAGCACATACAATCAATTTCAAATGATTGTCAAATGACAAATCATCCAAAATCCACAAAACTTGCCATGTGTATCATTACAGGAATAATGCACAAGCAAGTATTATGAGATTTTAATGATTCTGAAACGGGCATGCTCCCCGGAATACCAGGAAGCGCAATGTGCGTTCAAAGATTCGATGATTCACTGAATTCTGCAATTCACACTACTTATCGCATTTCG…	FJ827725	SH000767.07FU	426	Fungi	p__Chytridiomycota	c__Chytridiomycetes	o__Chytridiales	f__Chytridiaceae	g__Phlyctochytrium	s__Phlyctochytrium_sp	7	311986 Phlyctochytrium_reinboldtiae	6.77504e-151	0.97	89.2019	0	0	0	0	0	0	0	0	0	0	0	0	0	0	0	0	0	0	0	0	0	0	0	0	0	0	0	0	0	0	0
>a123310	Otu00001	Unclassified	TTAAGTTCAGCGGGTTTTCTTGCTCGATTTCAGACCAAATTATCAGAACAGCCATGCCAGAAGCAAAAGCCAGAACTGTGTAAATTGTGGTATTTGCACGCCGCAAAACGAGGAAATTTTAGCAGCAGTAAAGCGTAAACGAGTTGTAAGCGCTTCAAAGCCACCAGGTTATCCCTGTCATGTGGGCACAAACTCATTTTAAAGCGACTGTTAACCCGAAAGGATTAACAAATACGCCCAACATGCACCAATGCTTCAGGTTTAACCCCGATGCAAAAATAATCACCATACTTGCACTAAGGCGATTATTCGGCTAAAATGATGAAATCATTTCTAGAGCCTGGTTTGCAGATTTTTAATGATTCTGAAACGAGCATGCTTCCCGGAATACCAGGAAGC…	FJ827709	SH210200.07FU	493	Fungi	p__Chytridiomycota	c__Chytridiomycetes	o__Spizellomycetales	f__Spizellomycetaceae	g__Powellomyces	s__Powellomyces_sp	199	305221 Powellomyces_sp_PL_AUS_017	8.00854e-151	0.95	80.5274	0	0	0	0	0	0	0	0	0	0	0	0	0	0	0	0	0	0	0	0	0	0	0	0	0	0	0	0	0	0	0
>c36768	Otu01376	Unclassified	TTAAGTTCAGAGGGTTTTCTTGCTCGATTTCAGACCAAATTATCAGAACAGCCATGCCAGAAGCAAAAGCCAGAACTGTGTAAATTGTGGTATTTGCACGCCGCAAAACGAGGAAATTTTAGCAGCAGTAAAGCGTAAACGAGTTGTAAGCGCTTCAAAGCCACCAGGTTATCCCTGTCATGTGGGCACAAACTCATTTTAAAGCGACTGTTAACCCGAAAGGATTAACAAATACGCCCAACATGCACCAATGCTTCAGGTTTAACCCCGATGCAAAAATAATCACCATACTTGCACTAAGGCGATTATTCGGCTAAAATGATGAAATCATTTCTAGAGCCTGGTTTGCAGATTTTTAATGATTCTGAAACGAGCATGCTTCCCGGAATACCAGGAAGC…	FJ827709	SH210200.07FU	493	Fungi	p__Chytridiomycota	c__Chytridiomycetes	o__Spizellomycetales	f__Spizellomycetaceae	g__Powellomyces	s__Powellomyces_sp	8	305221 Powellomyces_sp_PL_AUS_017	3.6428e-148	0.95	80.5274	0	0	0	0	0	0	0	0	0	0	0	0	0	0	0	0	0	0	0	0	0	0	0	0	0	0	0	0	0	0	0
>b124294	Otu00041	Unclassified	TTAAGTTCAGCGGGTTTTCTTGCTCGATTTCAGACCAAATTATCAGAACAGCCATGCCAGAAGCAAAAGCCAGAACTGTGTAAATTGTGGTATTTGCACGCCGCAAAACGAGGAAATTTTAGCAGCAGTAAAGCGTACACGAGTTGTAAGCGCTTCACAGCCACCAGGTGATCCCTGTCATGTGGGCACAAACTCATTTTAAAGCGAGGATTAACAAATACGCCCAACATGCACCAATGCTTCAGGTTTAACCCCGATGCAAAAATAATCACCATACTTGCACTAAGGCGATTATTCGGCTAAAATGATGAAATCATTTCTAGAGCCTGGTTTGCAGATTTTTAATGATTCTGAAACGAGCATGCTTCCCGGAATACCAGGAAGCGCAATGTGCGTTCA…	FJ827709	SH210200.07FU	479	Fungi	p__Chytridiomycota	c__Chytridiomycetes	o__Spizellomycetales	f__Spizellomycetaceae	g__Powellomyces	s__Powellomyces_sp	4	305221 Powellomyces_sp_PL_AUS_017	2.4015e-131	0.92	79.9582	0	0	0	0	0	0	0	0	0	0	0	0	0	0	0	0	0	0	0	0	0	0	0	0	0	0	0	0	0	0	0
>b130680	Otu00110	Unclassified	TTAAGTTCAGCGGGTTTTCTTGCTCGATTTCAGACCAAATTATCAGAACAGCCATGCCAGAAGCAAAAGCCAGAACTGTGTAAATTGTGGTATTTGCACGCCGCAAAACGAGGAAATTTTAGCAGCAGTAAAGCGTAAACGAGTTGTAAGCGCTTCTAAGCCACGAGGATTAACAAATACGCCAAACATGCACCAATGCTTCAGGTTTAACCCCGATGCAAAAATAATCACCATACTTGCACTAAGGCGATTATTCGGCTAAAATGATGAAATCATTTCTAGAGCCTGGTTTGCAGATTTTTAATGATTCTGAAACGAGCATGCTTCCCGGAATACCAGGAAGCGCAATGTGCGTTCAAAGATTCGATGATTCACTGAATTCTGCAATTCACACTACTT…	FJ827709	SH210200.07FU	438	Fungi	p__Chytridiomycota	c__Chytridiomycetes	o__Spizellomycetales	f__Spizellomycetaceae	g__Powellomyces	s__Powellomyces_sp	3	305221 Powellomyces_sp_PL_AUS_017	2.78915e-97	0.93	65.0685	0	0	0	0	0	0	0	0	0	0	0	0	0	0	0	0	0	0	0	0	0	0	0	0	0	0	0	0	0	0	0
>a133071	Otu00047	Unclassified	TTAAGTTCAGCGGGTTTTCTTGCACGATTTCAGACCAAATTATCAGAACAGCCATGCCAGAAGCAAAAGCCAGAACTGTGTAAATTGTGGTATTTGCACGCCGCAAAACGAGGAAATTTTAGCAGCAGTAAAGCGTAAACGAGTTGTAAGCGCTTCAAAGCCACCAGGTTATCCCTTTCATGTGGCTGCTAACCCGAAAGGATTAACAAATACGCCCAACATGCACCAATGCTTCAGGTTTAACCCCGATGCAAAAATAATCACCATACTTGCACTAAGGCGATTATTCGGCTAAAATGATGAAATCATTTCTAGAGCCTGGTTTGCAGATTTTTAATGATTCTGAAACGAGCATGCTTCCCGGAATACCAGGAAGCGCAATGTGCGTTCAAAGATTCG…	FJ827709	SH210200.07FU	471	Fungi	p__Chytridiomycota	c__Chytridiomycetes	o__Spizellomycetales	f__Spizellomycetaceae	g__Powellomyces	s__Powellomyces_sp	2	305221 Powellomyces_sp_PL_AUS_017	5.96487e-119	0.9	79.6178	0	0	0	0	0	0	0	0	0	0	0	0	0	0	0	0	0	0	0	0	0	0	0	0	0	0	0	0	0	0	0
>c84734	Otu00053	Unclassified	TTAAGTTCAGCGGGTTTTCTTGCTCGATTTCAGACCAAATTATCGGAACAGCCATGCCAGAAGCAAAAGCCAGAACTGTGTAAATTGTGGTATTTGCACGCCGCAAAACGAGGAAATTTTAGCAGCAGTAAAGCGTAAACGAGTTGTAAGCGCTTCAAAGCCACCAGGTTATCCCTGTCATGTGGGCACAAACTCATTTTAAAGCGACTGTTAACCCGAAAGGATTAACAAATACGCCCAACATGCACCAATGCTTCAGAAATAACCACCATACTTGCACTAAGGCGATTATTCGGCTAAAATGATGAAATCATTTCTAGAGCCTGGTTTGCAGATTTTTAATGATTCTGAAACGAGCATGCTTCCCGGAATACCAGGAAGCGCAATGTGCGTTCAAAG…	FJ827709	SH210200.07FU	477	Fungi	p__Chytridiomycota	c__Chytridiomycetes	o__Spizellomycetales	f__Spizellomycetaceae	g__Powellomyces	s__Powellomyces_sp	2	305221 Powellomyces_sp_PL_AUS_017	1.41363e-129	0.91	80.9224	0	0	0	0	0	0	0	0	0	0	0	0	0	0	0	0	0	0	0	0	0	0	0	0	0	0	0	0	0	0	0
>a77349	Otu00057	Unclassified	TTAAGTTCAGCGGGTTTTCTTGCTCGATTTCAGGCCAAATTATCAGAACAGCCATGCCAGAAGCAAAAGCCAGAACTGTGTAAATTGTGGTATTTGCACGCCGCAAAACGAGGAAATTTTAGCAGCAGTAAAGCGTAAACGAGTTGTAAGCGCTTCAAAGCCACCAGGTTATCCCTGTCATTTTAGAGCGACTGTTAACCCGAAAGGATTAACAAATACGCCCAACATGCACCAATGCTTCAGGTTTAACCCCGATGCAAAAATAATCACCATACTTGCACTAAGGCGATTATTCGGCTAAAATGATGAAATCATTTCTAGAGCCTGGTTTGCAGATTTTTAATGATTCTGAAACGAGCATGCTTCCCGGAATACCAGGAAGCGCAATGTGCGTTCAAA…	FJ827709	SH210200.07FU	477	Fungi	p__Chytridiomycota	c__Chytridiomycetes	o__Spizellomycetales	f__Spizellomycetaceae	g__Powellomyces	s__Powellomyces_sp	2	305221 Powellomyces_sp_PL_AUS_017	3.01493e-128	0.91	79.8742	0	0	0	0	0	0	0	0	0	0	0	0	0	0	0	0	0	0	0	0	0	0	0	0	0	0	0	0	0	0	0
>d141714	Otu00063	Unclassified	TTAAGTTCAGCGGGTTTTCTTGCTCGATTTCAGACCAAATTATCAGAACAGCCATGCCAGAAGCAAAAGCCAGAACTGTGTAAATTGTGGTATTTGCACGCCGCAAAACGAGGAAATTTTAGCAGCAGTAAAGCGTAAACGAGTTGTAAGCGCTTCAAAGCCACCAGGTTATCCCTGTCATGTGGGCACAAACTCATTTTAAAGCGACTGTTAACCCGAAAGGATTAACAAATATGCAAAAATAATCACCATACTTGCACTAAGGCGATTATTCGGCTAAAATGATGAAATCATTTCTAGAGCCTGGTTTGCAGATTTTTAATGATTCTGAAACGAGCATGCTTCCCGGAATACCAGGAAGCGCAATGTGCGTTCAAAGATTCGATGATTCACTGAATT…	FJ827709	SH210200.07FU	456	Fungi	p__Chytridiomycota	c__Chytridiomycetes	o__Spizellomycetales	f__Spizellomycetaceae	g__Powellomyces	s__Powellomyces_sp	2	305221 Powellomyces_sp_PL_AUS_017	1.0534e-97	0.86	78.9474	0	0	0	0	0	0	0	0	0	0	0	0	0	0	0	0	0	0	0	0	0	0	0	0	0	0	0	0	0	0	0
>c30513	Otu00111	Unclassified	TTAAGTTCAGCGGGTTTTCTTGCTCGATTTCAGACCAAGGTTCAGAAACAATCTCAATACTAGAGATGGTTGCTGTATAGAATGGAAGTGTATTCCAAGTCCAATGTTCACAAAAGGTCCCCCAAAATGTTTCATTTGACTGTTGCATTGAGGGTAAACCAATTACTACCAATTGGGGCATACACGCAATCATTTTAAGGCAATTGCAATGTTGCACAAAGGCACCATAGCAAAAATGCCCAAATCCACGCCCAATAGGGGTTTTGCAACCCATATAGTTTGTGAGAACATATTGATTCTGAAACGAGCATGCTCCCCGGAATACCAGGAAGCGCAATGTGCGTTCAAAGATTCGATGATTCACTGAATTCTGCAATTCACACTACTTATCGCATTTCG…	FJ827711	SH221975.07FU	427	Fungi	p__Chytridiomycota	c__Chytridiomycetes	o__Spizellomycetales	f__Spizellomycetaceae	g__Powellomyces	s__Powellomyces_sp	2	310322 Powellomyces_hirtus	1.94199e-154	0.98	89.2272	0	0	0	0	0	0	0	0	0	0	0	0	0	0	0	0	0	0	0	0	0	0	0	0	0	0	0	0	0	0	0
>b111657	Otu00200	Unclassified	TTAAGTTCAGCGGGTTTTCTTGCTCGATTTCAGACCAAATTATCAGAACAGCCATGCCAGAAGCAAAAGCCAGAACTGTGTAAATTGTGGTATTTGCACGCCGCAAAACGAGGAAATTTTAGCAGCAGTAAAGCGTAAACGAGTTGTAAGCGCTTCAAAGCCACCAGGTTATCCCTATAATATTAACAAATACGCCCAACATGCACCAATGCTTCAGGTTTAACCCCGATGCAAAAATAATCACCATACTTGCACTAAGGCGATTATTCGGCTAAAATGATGAAATCATTTCTAGAGCCTGGTTTGCAGATTTTTAATGATTCTGAAACGAGCATGCTTCCCGGAATACCAGGAAGCGCAATGTGCGTTCAAAGATTCGATGATTCACTGAATTCTGCA…	FJ827709	SH210200.07FU	451	Fungi	p__Chytridiomycota	c__Chytridiomycetes	o__Spizellomycetales	f__Spizellomycetaceae	g__Powellomyces	s__Powellomyces_sp	2	305221 Powellomyces_sp_PL_AUS_017	2.21841e-96	0.95	58.5366	0	0	0	0	0	0	0	0	0	0	0	0	0	0	0	0	0	0	0	0	0	0	0	0	0	0	0	0	0	0	0
>a104219	Otu03845	Unclassified	TTAAGTTCAGCGGGTTTTCTTGCTCGATTTCAGACCAAGTTATCAAACAGTGATCCCTTCGAATCACTGAGAGTGTATTTTGGTTGAGTGTAAGATCATCCGGACAATGGAATCGCTTCTCATCAAGAGGTAACGAATGAGCTAACATCTGTTGCACTTGAGAGAACCGAACCAAGGAGGCCGGTTGCAAACACAATCATTTTCAAGCCATTGCCTTGCAGCAAAAGGGCTCACATCCGAAAGAGTAACGGCATCCCCCGAAGGTTCAGACCGTGTCTTTGAGAATGTTAATGATTCTGAAACGAGCGTGCTCCCCGGAATACCAGGGAGCGCAATGTGCGTTCAAAGATTCGATGATTCACTGAATTCTGCAATTCACACTACATATCGCATTTCGCT…	EU516768	SH006450.07FU	425	Fungi	p__Chytridiomycota	c__Chytridiomycetes	o__Spizellomycetales	f__Spizellomycetaceae	g__Powellomyces	s__Powellomyces_sp	2	314615 Powellomyces_sp	2.11552e-166	0.98	97.4118	0	0	0	0	0	0	0	0	0	0	0	0	0	0	0	0	0	0	0	0	0	0	0	0	0	0	0	0	0	0	0
>b91930	Otu01872	Unclassified	TTAAGTTCAGCGGGTCTTCCTACCTGATTTGAGACCATGGTTCAAAATTATAAATAATTTTATATGGTTTATGAACTTTTTAATATTATAATAACTCGTTAATATCAGTACAAATTTAATAGGCATAAGTAAGAAACTAGGTTTCATTCGAATACTTTTCAACTCGTTATAATAAAAACTCAAACGTTACTATATTATAAAAAGCTATAGTTTTAAAAGTACCATTAAATAAATAATGGAAACTTCAAATCTTTATATAAAAAACTGATAAAAATCAGTAAATTATATAAAATGAATACTATAGATTCTCAAACAGGCATACTCTATAGAAATAGAGTGCAATATGCGTTCAAAGATTTGATGATTCACGAGATTTTGCAATTCACATTACGTATCGCA…	AY997079	SH177054.07FU	432	Fungi	p__Chytridiomycota	c__Chytridiomycetes	o__Rhizophydiales	f__Rhizophydiaceae	g__Rhizophydium	s__Rhizophydium_brooksianum	14	290864 Rhizophydium_brooksianum	9.51323e-160	0.99	89.5833	0	0	0	0	0	0	0	0	0	0	0	0	0	0	0	0	0	0	0	0	0	0	0	0	0	0	0	0	0	0	0
>a15299	Otu01480	Unclassified	TTAAGTTCAGCGGGTCTTCCTGCCTGATTTGAGACCATGGTTCAAGTTACCCCCGAGAGGATAACTTTAATAGTTGAGTGCCGGACAAGCACCATCACACGTACTGAGTATTAGAGAAACCGAAGTTCCATACACATACTTTTCCGTTACTTGACAGTATCCAGCAGCAATAGTTTTAAAGGCACGCAGGGTAAGTGCGACGCCTCAAATCTCTCCTTCCCTAGGTATAAATACCCAAAGTTGGAGAATGAATACTATAGATTCTCAAACAGGCATACTCTGCCGAAACAGAGTGCAATGTGCGTTCAAAGATTCGATGATTCACGGAATTCTGCAATTCACATTACGTATCGCATTTCGCTGCGTTCTTCATCGATGACGAGTCTAG	DQ485626	SH014969.07FU	388	Fungi	p__Chytridiomycota	c__Chytridiomycetes	o__Rhizophydiales	f__Rhizophydiaceae	g__Rhizophydium	s__Rhizophydium_sp	77	318363 Rhizophydium_sp_JEL_385	9.66725e-145	0.96	97.1649	0	0	0	0	0	0	0	0	0	0	0	0	0	0	0	0	0	0	0	0	0	0	0	0	0	0	0	0	0	0	0
>a121335	Otu01565	Unclassified	TTAAGTTCAGCGGGTCCTCCTACCTGATTTGAGACCATGGTTCGGGTTAATAATTAACCTCCTAGGTTTCAATAAAGAATCCTTTTTGGGCTAATTACCTAGGAACGTTTCCCCAAAACATTGTGTAGGTTACTCAAAGAGTTTCAAACATTTTTGCTTTGGCGCTCTTTCGGCGACTAGCTATAGCTTTAAGCGCACTCTATCCTAGAGACTCGCCAAATCTTTTTCTCTAGTAAAAAATTCACTACGAGAAAAAAAAGTTACTATAGATTCTCAAACAGGCATACTCCCAAAGGAGTGCAATATGCGTTCAAAGATTCGATGATTCACGGAATTCTGCAATTCACATTACGTATCGCATTTCGCTGCGTTCTTCATCGATGACGAGTCTAG	FJ553370	SH478777.07FU	393	Fungi	p__Chytridiomycota	c__Chytridiomycetes	o__Rhizophydiales	f__Rhizophydiaceae	g__Rhizophydium	s__Rhizophydium_sp	70	330686 Rhizophydium_sp	1.94927e-100	0.87	98.4733	0	0	0	0	0	0	0	0	0	0	0	0	0	0	0	0	0	0	0	0	0	0	0	0	0	0	0	0	0	0	0
>a28634	Otu01530	Unclassified	TTAAGTTCAGCGGGTCTTCCTGCCTGATTTGAGACCATGGTTCAAGTTACCCCCGAAAGGATAACTTTAATAGTTGAGTGCCGGACAAGCACCATCACCCGTACTAAGTATTAGAGAAACCGAAGTTCCATACACATACTTTTCCGTTACTTGACAGTATCCAGCAGCAATAGTTTTAAAGGCACGCAGGGTAAGTGCGACGCCTCAAATCTCTCCTTCCCTAGGTATAAATACCCAAAGTTGGAGAATGAATACTATAGATTCTCAAACAGGCATACTCTGCCGAAACAGAGTGCAATGTGCGTTCAAAGATTCGATGATTCACGGAATTCTGCAATTCACATTACGTATCGCATTTCGCTGCGTTCTTCATCGTTGACGAGTCTAG	FN391362	SH196848.07FU	388	Fungi	p__Chytridiomycota	c__Chytridiomycetes	o__Rhizophydiales	f__Rhizophydiaceae	g__Rhizophydium	s__Rhizophydium_sp	66	299765 Rhizophydium_sp	9.66725e-145	0.96	97.1649	0	0	0	0	0	0	0	0	0	0	0	0	0	0	0	0	0	0	0	0	0	0	0	0	0	0	0	0	0	0	0
>a13867	Otu01573	Unclassified	TTAAGTTCAGCGGGTCTTCCTGCCTGATTTGAGACCATGGTTCAAGTCAACCCGAAGGTTGCCTTTAATAGTTGAGTGCCGGACATGCACCACCACACGTACTGGGTATTAGAGAAACCGAAGTCTCATACACATACTTTTCCGTTACTTGGTAGTATCCAGCAGCAATAGTTTTAAAAGCACGCAGGGTAAGTGCGACGCCTCAAATCTCTCCTTCCCTAGGTATAAATACCCAAGGTTGGAGAATGAATACTATAGATTCTCAAACAGGCATACTCTGCCGAAACAGAGTGCAATGTGCGTTCAAAGATTCGATGATTCACGGAATTCTGCAATTCACATTACGTATCGCATTTCGCTGCGTTCTTCATCGTTGACGAGTCTAG	DQ485626	SH014969.07FU	386	Fungi	p__Chytridiomycota	c__Chytridiomycetes	o__Rhizophydiales	f__Rhizophydiaceae	g__Rhizophydium	s__Rhizophydium_sp	54	318363 Rhizophydium_sp_JEL_385	7.85194e-152	0.98	97.1503	0	0	0	0	0	0	0	0	0	0	0	0	0	0	0	0	0	0	0	0	0	0	0	0	0	0	0	0	0	0	0
>b18174	Otu01884	Unclassified	TTAAGTTCAGCGGGTATTCCTACCTGATTTGAGACCATGGTTCAAGCAAAGACTTTTTACGGTCTAGGCTTTATGTATATGGACCGACTTCGCTATAGAAACTAACCCCCACTGTCTTCTACTCGGCATTATGAGAAACGCTAGTTTCATTCAAATACTTTTGGTCGACTTTGTAGGGAATCAAACATTTCTACACCGTAACCAGTTATTAATTTCAAGGCACTCGAATAGAGAAGCCTCACATCTCTCTTAGCAAACCGATTACTCAGTAAACTTAGAAAATAAATACTTTAGATTCTCAAACAGGCATACTCTCCGTAAAGAGAGTGCAATATGCGTTCAAAGATTCGATGATTCACGGAATTCTGCAATTCACATTACGTATCGCATTTCGCTGCG…	DQ485685	SH467633.07FU	422	Fungi	p__Chytridiomycota	c__Chytridiomycetes	o__Rhizophydiales	f__Rhizophydiaceae	g__Rhizophydium	s__Rhizophydium_sp	16	329152 Rhizophydium_sp_PL_157	6.05459e-104	0.82	98.5782	0	0	0	0	0	0	0	0	0	0	0	0	0	0	0	0	0	0	0	0	0	0	0	0	0	0	0	0	0	0	0
>b15031	Otu02339	Unclassified	TTAAGTTCAGCGGGTATTCCTACCTGATTTGAGACCATGGTTCAAGCCTAGTCGTTTGACCGCCTAGACTTTATAGTTATGGACTGGCTATAGTATAGTAACTAGCCCCTACTGTCCCCTACTCGGCATTATGAGAAACCAAGGTTTCATTCAAATACTTTTGGGTTGACTTTGCAGAGATTCAAGCATCACTACGCACAAACCAGCTATCAATTTCAAGGCACTCATAGTAAACTACGAGAAGCCTCATATCTCTACTGCTAAAAGACCCGAAAGTCCTAAAACCGTAAAATAAATACTTTAGATTCTCAAACAGGCATACTCTTCGTAAAAAGAGTGCAATATGCGTTCAAAGATTCGATGATTCACGGAATTCTGCAATTCACATTACGTATCGCA…	DQ485685	SH467633.07FU	432	Fungi	p__Chytridiomycota	c__Chytridiomycetes	o__Rhizophydiales	f__Rhizophydiaceae	g__Rhizophydium	s__Rhizophydium_sp	5	329152 Rhizophydium_sp_PL_157	7.09761e-155	0.93	98.6111	0	0	0	0	0	0	0	0	0	0	0	0	0	0	0	0	0	0	0	0	0	0	0	0	0	0	0	0	0	0	0
>b38271	Otu02419	Unclassified	TTAAGTTCAGCGGGTATTCCTACCTGATTTGAGACCATGGTTCAAGCCTAGTCGTTTGACCGCCTAGACTTTATAGTTATGGACTGACCTTAGCCTAGCAACTAGCCCCTACTGTCCCCTACTCGGCATTATGAGAAACCAAGGTTCCATTCAAATACTTTTGGGTTGACTTTGCAGAGATTCAAGCATCACTACGCACAAACCAGCTATCAATTTCAAAGCACTCATACCAAGGTACGAGATGCCTCATATCTCTACCGCAAAAGAACCCAAGGGCCCTAAAAACAGTAGAATAAATACTTTAGATTCTCAAACAGGCATACTCCCCGTAAAGAGAGTGCAATATGCGTTCAAAGATTCGATGATTCACGGAATTCTGCAATTCACATTACGTATCGC…	DQ485685	SH467633.07FU	433	Fungi	p__Chytridiomycota	c__Chytridiomycetes	o__Rhizophydiales	f__Rhizophydiaceae	g__Rhizophydium	s__Rhizophydium_sp	4	329152 Rhizophydium_sp_PL_157	4.89865e-173	0.98	98.6143	0	0	0	0	0	0	0	0	0	0	0	0	0	0	0	0	0	0	0	0	0	0	0	0	0	0	0	0	0	0	0
>a72931	Otu02540	Unclassified	TTAAGTTCAGCGGGTCTTCCTGCCTGATTTGAGACCATGGTTCAAGTCAACCCCAAGAGGTTGCCTTTAATAGTTGAGTGCCAGACATACACCATCACACGTACTGGGTATTAGAGAAACCAAGGTTTCATACACATACTTTTCCGTTACTTGACAGTATCCAGCAGCAATAGTTTTAAAAGCACGCAGGGTTAGTGCGATGCCTCAAATCTCTCCTTCCCTAGGTATAAATACCCAAGGTTGGAGAATGAATACTATAGATTCTCAAACAGGCATACTCTGCCGAAACAGAGTGCAATGTGCGTTCAAAGATTCGATGATTCACGGAATTCTGCAATTCACATTACGTATCGCATTTCGCTGCGTTCTTCATCGATGACGAGTCTAG	DQ485626	SH014969.07FU	388	Fungi	p__Chytridiomycota	c__Chytridiomycetes	o__Rhizophydiales	f__Rhizophydiaceae	g__Rhizophydium	s__Rhizophydium_sp	4	318363 Rhizophydium_sp_JEL_385	3.59335e-149	0.97	97.1649	0	0	0	0	0	0	0	0	0	0	0	0	0	0	0	0	0	0	0	0	0	0	0	0	0	0	0	0	0	0	0
>a39419	Otu02168	Unclassified	TTAAGTTCAGCGGGTAGTCCTACCTGATTTGAGACCATGGTTCGCTACCAAGGTAGTCTTTTGGGGACGGATTCTTGGTTAGACTCGCTGGCCCTTTCACCACGTACAGTAGAGCCTTGCAGCACTTTCGAATACGCAGTGGACCAACTCAATCGTCGTCTCCACAAACCCGTTACCGTTTTCAAATCACTACCGATCGGTAGACGACTCAAATCTCAGTCTGTCTAGTCAACTAGAACAAACCAAACAAATACGTTAGATTCTCAAACAGGCATACTCTTCCGAAAAAGAGTGCAATGTGCGTTCAAAGATTCGATGATTCACGGAATTCTGCAATTCACATTACGTATCGCATTTCGCTGCGTTCTTCATCGGTGACGAGTCTAG	DQ485605	SH199952.07FU	387	Fungi	p__Chytridiomycota	c__Chytridiomycetes	o__Rhizophydiales	f__Rhizophydiaceae	g__Rhizophydium	s__Rhizophydium_sp	2	301060 Rhizophydium_aestuarii	1.97333e-104	0.85	98.4496	0	0	0	0	0	0	0	0	0	0	0	0	0	0	0	0	0	0	0	0	0	0	0	0	0	0	0	0	0	0	0
>a132329	Otu02629	Unclassified	TTAAGTTCAGCGGGTATTCCTACCTGATTTGAGACCATGGTTCAAGCCTAGACTTTTTAAGGTCTAGACTTTATAGTTATGGACCGACCTCCCTATAAAAACTCACCCCTACTGTCTCCTACTAGGCATTATGAGAAACTACCGTTTCATTCAAATACTTTTGGTTGACTTTGCAGAGACTCAAACATTTCTACAGCGAAACCAGTTATATATTTCAAGGCACTCGGTTAGAGAAGCCTCACATCTCTCTACGGTATACCTTTGACAGTAACCGCAGAAAATAAATACATTAGATTCTCAAACAGGCATACTCTCCGTAAAGAGAGTGCAATATGCGTTCAAAGATTCGATGATTCACGGAATTCTGCAATTCACATTACGTATCGCATTTCGCTGCGT…	DQ485685	SH467633.07FU	421	Fungi	p__Chytridiomycota	c__Chytridiomycetes	o__Rhizophydiales	f__Rhizophydiaceae	g__Rhizophydium	s__Rhizophydium_sp	2	329152 Rhizophydium_sp_PL_157	1.05231e-109	0.83	98.5748	0	0	0	0	0	0	0	0	0	0	0	0	0	0	0	0	0	0	0	0	0	0	0	0	0	0	0	0	0	0	0
>c159867	Otu02810	Unclassified	TTAAGTTCAGCGGGTCCTCCTACCTGATTTGAGACCATGGTTCGGGTTAATTAAAACCTCCTGGTTCAATAACGAATCCTTTGAGCTAACCACCAGAGAAAGCGTTTATCCAAATCAAAAATGTAGGTTACTCTAAAGAGTTTCAAACAATTTTTGCTTTGGCACTTTTTCAGCGACTAGCTATAACTTTAAGCGTACTTTAGAAAAGACACGCCAAATCTCTTTCCAGTAAACTAGAAAAAAAAATACTATAGATTCTAAAACAGGCATACTCCCAAAGGAGTGCAATATGCGTTCAAAGATTCGATGATTCACGGAATTCGGCAATTCACATGACGTATCGCATTTCGCTGCGTTCTGCATCGTGACGAGTCTAG	FJ553370	SH478777.07FU	377	Fungi	p__Chytridiomycota	c__Chytridiomycetes	o__Rhizophydiales	f__Rhizophydiaceae	g__Rhizophydium	s__Rhizophydium_sp	2	330686 Rhizophydium_sp	2.67139e-148	0.97	98.4085	0	0	0	0	0	0	0	0	0	0	0	0	0	0	0	0	0	0	0	0	0	0	0	0	0	0	0	0	0	0	0
>c136813	Otu03399	Unclassified	TTAAGTTCAGCGGGTCTTCCTGCCTGATTTGAGATCTGAAGTTTGTCTTTTGTCTTTTGTTTAGTGCCACCACTCGGAGAACTCGAGAAGTGCTGCCACAACTAGTCTTGGACTAGGAGACCACAATAAACAGGACATCAGGTCACAAGCCACACGGCCGCATTCGAGAAGCGAAATCGTTCACTCACACACGGCGTGCGCTGGCGCCTCTTGCATTTCCAAGCACCCAAACGGGACACTCGACCTCCTCTCGCGAGAATAAAGACGATTCTCAAACAGGCATACTCCAAAGGAGTGCAATATGCGTTCAAAGATTCAATGATTCACGGAAAGCAATTCACATTACGTATCGCATTTCGCTGCGTTCTTCATCGATGACGAGCCTAG	DQ485625	SH484223.07FU	387	Fungi	p__Chytridiomycota	c__Chytridiomycetes	o__Rhizophydiales	f__Rhizophydiaceae	g__Rhizophydium	s__Rhizophydium_sp	2	331443 Rhizophydium_sp_JEL_356	1.80164e-92	0.84	98.4496	0	0	0	0	0	0	0	0	0	0	0	0	0	0	0	0	0	0	0	0	0	0	0	0	0	0	0	0	0	0	0
>c22554	Otu03836	Unclassified	TTAAGTTCAGCGGGTATTCCTACCTGATTTGAGACCATGGTTCAAGCCAGAACTTTTTACGGTTCAGACTTTAAGTATATGGACCACCTTCGCTATAGAAACTACTCCCTACTGTCTTCTACTAGGCATTATGAGAAACAATAGTTTCATTCAAATACTTTTGGTCGACTTTGGTAGAGACTCAAACACTTCTACACCGAAACCAGTTATAAATTTCAAGGCAGTCGGGTAGACACGCCTCACGACTCCCTAGGCAAACCGATTACTCAGTAAACTTAGGAAACAAATACTTTAGATTCTCAAACAGGCATACTCTCCGTAAAGAGAGTGCAATATGCGTTCAAAGATTCGATGATTCACGGAATTCTGCAATTCACATTACGTATCGCATTTCGCTGC…	DQ485685	SH467633.07FU	423	Fungi	p__Chytridiomycota	c__Chytridiomycetes	o__Rhizophydiales	f__Rhizophydiaceae	g__Rhizophydium	s__Rhizophydium_sp	2	329152 Rhizophydium_sp_PL_157	2.67906e-97	0.81	98.5816	0	0	0	0	0	0	0	0	0	0	0	0	0	0	0	0	0	0	0	0	0	0	0	0	0	0	0	0	0	0	0
>a26277	Otu03972	Unclassified	TTAAGTTCAGCGGGTCTTCCTCCTGATTTGAGATCTGAAGTTTGTCTTTTGTCTTTTGTTTAGTGCCACCACTCGAGAAGTGCCACCACTCGAGAGGTGCTGCCACAACTAGTCTTGGACTAGGAGACCACAATAAACAGGACATCAGGTCACAGGCCACACGGCCGCATTCGAGAAGCGAAATCGTTCACTCACACACGGCGTGCGCTGGCGCCTCTTGCATTTCCAAGCACCCAAACGGGACACTCGACCTCCTCTCGCGAGAATAAAGACGATTCTCAAACAGGCATACTCCAAAGGAGTGCAATATGCGTTCAAAGATTCAATGATTCACGGAAAGCAATTCACATTACGTATCGCATTTCGCTGCGTTCTTCATCGGTGACGAGTCTAG	DQ485625	SH484223.07FU	394	Fungi	p__Chytridiomycota	c__Chytridiomycetes	o__Rhizophydiales	f__Rhizophydiaceae	g__Rhizophydium	s__Rhizophydium_sp	2	331443 Rhizophydium_sp_JEL_356	6.43658e-89	0.97	60.4061	0	0	0	0	0	0	0	0	0	0	0	0	0	0	0	0	0	0	0	0	0	0	0	0	0	0	0	0	0	0	0
>a1547	Otu01284	Unclassified	TTAAGTTCAGCGGGTTTTCTTGCCCGATTTCAGACCAAGTTATCAAATGTTTTACCCAAGGGCAAAACAGTTGTTAAGAAGTTGGGTATATGCTTCCGTCCAACCCCAAGAGCTGTCAAAGCGAAATAGAAAAATCTGTTGCACTTTGGTAACCCAAGGAATAGTCGATGGATGCACACACTATCATTTTAAGACGATTGTCGAAACAAAGCATCCAAATCCACTCAAAAGCGGAGCTCCGAAAAGCTCCACTGCGGTGAGATTTTAATGATTCTGAAACGGGCATGCTCCCCGGAATACCAGGAAGCGCAATGTGCGTTCAAAGATTCGATGATTCACTGAATTCTGCAATTCACACTACTTATCGCATTTCGCTGCGTTCTTCATCGATGACGAGTC…	GQ499378	SH196352.07FU	402	Fungi	p__unidentified	c__Chytridiomycetes	o__Spizellomycetales	f__Spizellomycetaceae	g__Spizellomyces	s__Spizellomyces_sp	611	299521 Spizellomyces_pseudodichotomus	9.01969e-164	0.99	98.5075	0	0	0	0	0	0	0	0	0	0	0	0	0	0	0	2	0	0	0	0	0	0	0	0	0	0	0	0	0	0	0
>a18401	Otu01304	Unclassified	TTAAGTTCAGCGGGTTTTCCCGCCCGATTCCAGATCAAGTTATCGGAAACCGGATCGTACCGATCCGGAAACCGTGCTGGAGGGTAGAAGCATGCCCATCGAGGCGATCCTTCCATTGTCCAAGCGGCGACAAAAATCTGTTGCACTTTGACAACGCAAAGACCAAGCTTCGGTGTACATACACTGAATTTGAGATGATTGCAAAAAGCAAAAATCCATGTTCCACCCTCGCTTGGGGTCCGAAAACACCCAAGCTGGAGTGAGATTTTTACTGATTCTGGAACGGGCGTGCTCTCCGGAATACCAGGGAGCGCAATGTGCGTTCAAAGATTCGATGATTCACTGAATTCTGCAATTCACACTACTTATCGCATTTCGCTGCGTTCTTCATCGATGACG…	JX043201	SH210367.07FU	406	Fungi	p__Chytridiomycota	c__Chytridiomycetes	o__Spizellomycetales	f__Spizellomycetaceae	g__Spizellomyces	s__Spizellomyces_sp	465	305294 Spizellomyces_sp	1.36642e-149	0.95	98.2759	0	0	0	0	0	0	0	0	0	0	0	0	0	0	0	0	0	0	0	0	0	0	0	0	0	0	0	0	0	0	0
>a64345	Otu01363	Unclassified	TTAAGTTCAGCGGGTTTTCTTGCCCGATTTCAGACCAAGTTATCAAGCAGCAAACCAAAATAGTTTGACACTTGTTGATAGTTGGAGCACATGTTCCATCAGTATCAAAATAAATTGCCAAAAGCGAATGGAGTTTCCTCTGTTGCACTTTTGATAACCAATTTTGTCCTATTGGCGCACATACAATCTTTTTCTGGTGATTGCCTGAGGCAAAGCATCCAAATCCACAATACTATAAGTGCAATGACATAACAGTTTGTGAGATTTTAATGATTCTGAAACGGGCATGCTCCCCGGAATACCAGGAAGCGCAAGGTGCGTTCAAAGATTCGATGATTCACTGAATTCTGCAATTCACACTACTTATCGCATTTCGCTGCGTTCTTCATCGATGACGAG…	EU480335	SH024454.07FU	404	Fungi	p__Chytridiomycota	c__Chytridiomycetes	o__Spizellomycetales	f__Spizellomycetaceae	g__Spizellomyces	s__Spizellomyces_sp	265	323131 Spizellomyces_sp	2.89749e-148	0.96	96.0396	0	0	0	0	0	0	0	0	0	0	0	0	0	0	0	0	0	0	0	0	0	0	0	0	0	0	0	0	0	0	0
>a30761	Otu01712	Unclassified	TTAAGTTCAGCGGGTTTTCCCGCCCGATTCCAGATCAAGTTATCGGATCCCAAATCATTGCGATTCGGAAGCCGTGCGGTGAATGTGAAGCATGTCCATCAAAGCCGTCCAATCGACTGTCCAAGCGGCGACAAAAATCTGTTGCACTTTGACAACCGAAAGACTGAACTTTGGTGTACATACATTTAATTTAAGATGATTGCAAAAACACAAAAATCCATGGTCCACCCTTGCTCGGGGTCCGAAGACATCCAAACCTGGGTGAGAGTTTTACTGATTCTGGAACGGGCGTGCTCTCCGGAATACCAGGGAGCGCAATGTGCGTTCAAAGATTCGATGATTCACTGAATTCTGCAATTCACACTACTTATCGCATTTCGCTGCGTTCTTCATCGATGA…	JX043201	SH210367.07FU	408	Fungi	p__Chytridiomycota	c__Chytridiomycetes	o__Spizellomycetales	f__Spizellomycetaceae	g__Spizellomyces	s__Spizellomyces_sp	34	305294 Spizellomyces_sp	3.88758e-118	0.86	98.2843	0	0	0	0	0	0	0	0	0	0	0	0	0	0	0	0	0	0	0	0	0	0	0	0	0	0	0	0	0	0	0
>a50761	Otu01818	Unclassified	TTAAGTTCAGCGGGTTTTCTTGCCCGATTTCAGATCAAGTTATCGGAAATCCAAATCATACCGATTTGAAGACCGTATTATTGGTGAAGCATGCGCATCAAGAGCATCAATCGACTGCCAAAGCGAAAAAGATAAAATCTGTTGCACTCGGACAACCAAAAGAAACATCAATTGGTGCACACACAATGAATTTAAGATGATTGCTAACGCAAAAACCCAGATCCACCTGCACTCAATGCTCGAAAGCACCAAGTTGGGTGAGATTTTTATTGATTCTGAAACGGGCATGCTTCCCGGAATACCAGGAAGCGCAATGTGCGTTCAAAGATTCGATGATTCACTGAATTCTGCAATTCACACTACTTATCGCATTTCGCTGCGTTCTTCATCGTTGACGAG…	FJ827714	SH183868.07FU	404	Fungi	p__Chytridiomycota	c__Chytridiomycetes	o__Spizellomycetales	f__Spizellomycetaceae	g__Spizellomyces	s__Spizellomyces_sp	32	293781 Spizellomyces_dolichospermus	2.03448e-135	0.96	88.6139	0	0	0	0	0	0	0	0	0	0	0	0	0	0	0	0	0	0	0	0	0	0	0	0	0	0	0	0	0	0	0
>a6882	Otu01669	Unclassified	TTAAGTTCAGCGGGTTTTCTTGCCCGATTTCAGATCAAGTTATCGGAAATCCAAATCATACCGATTTGAAGACCGTATTATGGGTGAAGCATGCGCATCAAGAGCATCAATCAATTGCCAAAGCGAAATAGATAAATCTGTTGCACTCGGACAACCAAAAGAAACATCAATTGGTGCACACACAATGAATTTAAGAAGATTGCTAACGCAAAGATCCAGATCCACCTCCACTCAACGCTCGAAAGCACCAAGCTGGGTGAGATTTTTATTGATTCTGAAACGGGCATGCTTCCCGGAATACCAGGAAGCGCAATGTGCGTTCAAAGATTCGATGATTCACTGAATTCTGCAATTCACACTACTTATCGCATTTCGCTGCGTTCTTCATCGATGACGAGT…	FJ827714	SH183868.07FU	403	Fungi	p__Chytridiomycota	c__Chytridiomycetes	o__Spizellomycetales	f__Spizellomycetaceae	g__Spizellomyces	s__Spizellomyces_sp	27	293781 Spizellomyces_dolichospermus	1.01067e-144	0.99	88.5856	0	0	0	0	0	0	0	0	0	0	0	0	0	0	0	0	0	0	0	0	0	0	0	0	0	0	0	0	0	0	0
>a92897	Otu01983	Unclassified	TTAAGTTCAGCGGGTTTTCTTGCCCGATTTCAGACCAAGTTATCAGAGACCACCCCAACTGTGGCAGCCCCTGTGTAAAACATTGAGAACATGCTCCGAAGCAGCCCATCGGGAGTCCTCCGTGAAATAGATGATTCTGTTGCACTTTGGAAACCCATTGAACAGCCAATCGGTGCACGCACAATGTGTTTGAGGCGCTTGCACATCGGCAAAGGCACCCATATCCAGTAACCCGTCGTCCGAAAACACCGGGGTCGTGAGATTTTCAATGATTCTGAAACGGGCATGCTCCCCGGAATACCAGGAAGCGCAATGTGCGTTCAAAGATTCGATGATTCACTGAATTCTGCAATTCACATTACTTATCGCATTTCGCTGCGTTCTTCATCGGTGACGAGT…	AB520470	SH183851.07FU	403	Fungi	p__Chytridiomycota	c__Chytridiomycetes	o__Spizellomycetales	f__Spizellomycetaceae	g__Spizellomyces	s__Spizellomyces_sp	9	293772 Spizellomyces_sp	5.23929e-92	0.8	98.5112	0	0	0	0	0	0	0	0	0	0	0	0	0	0	0	0	0	0	0	0	0	0	0	0	0	0	0	0	0	0	0
>d173442	Otu02201	Unclassified	TTAAGTTCAGCGGGTTTTCTTGCCCGATTTCAGACCAAGTTATCAAAGATTTCACCCAAGGGCGAAACATTTGTTAAGAAGTTGGGTATATGCTTCCGTCCAACCCCAAGAGCTGTCAAAGCGAAATAGAAAAATCTGTTGCACTTTGGTAACCCAAGGAATATTCGATGGATGCACACACTATCATTTTAAGACGATTGTCGGAACAAAGCATCCAAATCCACTCTAAAGCGTAGCTCCGAAAAGCTCCACTGTGGTGAGATTTTAATGATTCTGAAACGGGCATGCTCCCCGGAATACCAGGAAGCGCAATGTGCGTTCAAAGATTCGATGATTCACTGAATTCTGCAATTCACACTACTTATCGCATTTCGCTGCGTTCTTCATCGATGACGAGTC…	GQ499378	SH196352.07FU	402	Fungi	p__Chytridiomycota	c__Chytridiomycetes	o__Spizellomycetales	f__Spizellomycetaceae	g__Spizellomyces	s__Spizellomyces_sp	8	299521 Spizellomyces_pseudodichotomus	6.52828e-155	0.96	98.5075	0	0	0	0	0	0	0	0	0	0	0	0	0	0	0	0	0	0	0	0	0	0	0	0	0	0	0	0	0	0	0
>c39940	Otu02649	Unclassified	TTAAGTTCAGCGGGTTTTCCCGCCCGATTCCAGATCAAGTTATCGGGCCCCCGAACCATCCGATTCAGGAGTCCGTGTTGAGACTTGAAGCATGAACGTCAAGGCCGTCGATCGCATCGTCCAAGCGAATAGACAAAATCTGTTGCACTTTGACGACCAGAAGACTGAGCTGTTGGCGTACATACGATCAGTTTGAGATGATTGCTGACGCAAAAATCCAAAAACCACCTCCTGCCCCGGCGTAAGAAAGCACCAAAGCCTGACGTGAGGTTTTTACTGATTCTGGAACGGGCGTGCTCTCCGGAATACCAGGGAGCGCAATGTGCGTTCAAAGATTCGATGATTCACTGAATTCTGCAATTCACACTACTTATCGCATTTCGCTGCGTTCTTCATCGA…	JX043201	SH210367.07FU	411	Fungi	p__Chytridiomycota	c__Chytridiomycetes	o__Spizellomycetales	f__Spizellomycetaceae	g__Spizellomyces	s__Spizellomyces_sp	6	305294 Spizellomyces_sp	1.21485e-98	0.82	98.2968	0	0	0	0	0	0	0	0	0	0	0	0	0	0	0	0	0	0	0	0	0	0	0	0	0	0	0	0	0	0	0
>d39839	Otu02651	Unclassified	TTAAGTTCAGCGGGTTTTCCTACCCGATTTCAGATCAAGTTTTTGGAGTACCAAATCTTTACAATCTGGCCCTCGCGATATGGGGTGAGTAAACGCATCAGGGAGGTCAAGCAGCTGCCAAAGCGAAATGGATAAACCACTTGTTGCACTTGGACAACCAAAAGACGAATCGACTGGTGCACATACAATGGATTTCAGATAATTGCCAGAGCAAAGATCCATATCCACCTTGACCTCGGTGCTCGAGAGCACCGATTTGGGGTGAGATTTTTATTGATTCTGAGACGGGCATGCTTCCCGGAATACCAGGAAGCGCAATGTGCGTTCAAAGATTCGATGATTCACTGAATTCTGCAATTCACACTACTTATCGCATTTCGCCACGTTCTTCATCGATGA…	JX043199	SH462460.07FU	408	Fungi	p__Chytridiomycota	c__Chytridiomycetes	o__Spizellomycetales	f__Spizellomycetaceae	g__Spizellomyces	s__Spizellomyces_sp	6	328431 Spizellomyces_sp	3.54936e-106	0.83	98.2843	0	0	0	0	0	0	0	0	0	0	0	0	0	0	0	0	0	0	0	0	0	0	0	0	0	0	0	0	0	0	0
>a22272	Otu02126	Unclassified	TTAAGTTCAGCGGGTTTTCTTACCCGATTTCAGACCAAGTTAAACAGATGCAGCTCCAAAAAGAGAACTACAGCTGGTATAATTGTATTCTGCCTACCGAGCAGCACTGCTACTATCACCGTGGTCAAGCGAATAGAAAAATCTGTTGCACTTGATTGACCGGCAAAAGAGCCGAACTGCAGCACGCAAATGAACTCCAGGCGAGTAGTGCAACAAAACACCCATATCAACCTGCTCAAAATGCTTCATTACAAAGCAAAGAGAGCTTGTGAGAATTTAATGGTACTGAAACGGGCATGCTCCCCGGAATACCAGGGAGCGCAAGGTGCGTTCAAAGATTCGATGATTCACTATATTCTGCAATTCACACTACGTATCGCATTTCGCTGCGTTCTTCAT…	KF225818	SH023933.07FU	414	Fungi	p__Chytridiomycota	c__Chytridiomycetes	o__Spizellomycetales	f__Spizellomycetaceae	g__unidentified	s__Spizellomycetaceae_sp	7	322878 uncultured_Kochiomyces	4.2016e-126	0.89	98.5507	0	0	0	0	0	0	0	0	0	0	0	0	0	0	0	0	0	0	0	0	0	0	0	0	0	0	0	0	0	0	0
>c25352	Otu02288	Unclassified	TTAAGTTCAGCGGGTTTTCTTGCCCGATTTCAGACCAGGTTATCAGAGATCCGCATCTGACCGATGCAAACCCTGTGTGGACCCAGGCACATGCTCCGGAAGGTGCCCCAATTGGATTGACCTCAGCGAATAGAAAAATCTGTTGCACTTTGGAACCCAATTGATACGCCAATTGGTGCACATACCATCATTTTAAGACGATTGCCAAAGCAAAACATCCAACATCCACCGGCCCAGGATCGCAAGACCCAGGACAGGTGAGATTGTTAATGATTCTGAAACGGGCATGCTCCCCGGAATACCAGGAAGCGCAATGTGCGTTCAAAGATTCGATGATTCACGGAATTCTGCAATTCACAATACTTATCGCATTTCGCTGCGTTCTTCATCGTTGACGAG…	EU489945	SH481094.07FU	404	Fungi	p__Chytridiomycota	c__Chytridiomycetes	o__Spizellomycetales	f__Spizellomycetaceae	g__unidentified	s__Spizellomycetaceae_sp	7	331008 Spizellomycetaceae_sp	4.56244e-107	0.84	98.5149	0	0	0	0	0	0	0	0	0	0	0	0	0	0	0	0	0	0	0	0	0	0	0	0	0	0	0	0	0	0	0
>b41672	Otu02960	Unclassified	TTAAGTTCAGCGGGTTTTCTTACCCGATTTCAGACCAAGTTAAACAGATGCAGCTCCAAAAAGGAAACTACAGCTGGTATAATTGTATTATGCCTACGGAACAGCACTGCTATCTTTTGGTTGGTCAAGTGAATAGAAAAAATCTGTTGCACTTGATTGACCGGCAGAAGAGCCGAACTGCAGCACGCAAATGACTTCCAGGCGATTTTTTCTTGATGAGGAAAAAAAAACACCCATATCCACTTGCTCTAATTGCTTCATTACAAAGCAAAGGGAGCTTGTGAGAATTTAATGGTACTGAAACGGGCATGCTCCCCGGAATACCAGGGAGCGCAAGGTGCGTTCAAAGATTCGATGATTCACTATATTCGGCAATTCACACTACGTATCGCATTTCGC…	KF225818	SH023933.07FU	425	Fungi	p__Chytridiomycota	c__Chytridiomycetes	o__Spizellomycetales	f__Spizellomycetaceae	g__unidentified	s__Spizellomycetaceae_sp	3	322878 uncultured_Kochiomyces	7.10449e-124	0.87	98.8235	0	0	0	0	0	0	0	0	0	0	0	0	0	0	0	0	0	0	0	0	0	0	0	0	0	0	0	0	0	0	0
>b104448	Otu03258	Unclassified	TTAAGTTCAGCGGGTTTTCTTACCCGATTTCAGACCAAGTTAAACAGATGCAGCTCCAAAAGAACTACAGCTGGTATAATTGTATCCTGCCTACCGAGCAGCACTGCTACACATTACCGTGGTCAAGCGAATAGAAAAATCTGTTGCACTTGATTGACCGGCAAAAGAGCCGAACTGCAGCACGCAAATGAATTCCAGGCGATTTGCAACACACACCCGAAAGTGTCATGCAAAAGCTGCCCATATCCACCTGCTCAAATTACTTCATTACAAAGCAAAGAGAGCTTGTGAGAATTTAATGGTACTGAAACGGGCATGCTCCCCGGAATACCAGGGAGCGCAAGGTGCGTTCAAAGATTCGATGATTCACTATATTCTGCAATTCACACTACGTATCGC…	KF225818	SH023933.07FU	433	Fungi	p__Chytridiomycota	c__Chytridiomycetes	o__Spizellomycetales	f__Spizellomycetaceae	g__unidentified	s__Spizellomycetaceae_sp	2	322878 uncultured_Kochiomyces	3.3368e-156	0.94	98.6143	0	0	0	0	0	0	0	0	0	0	0	0	0	0	0	0	0	0	0	0	0	0	0	0	0	0	0	0	0	0	0
>a67723	Otu03881	Unclassified	TTAAGTTCAGCGGGTTTTCTTACCCGATTTCAGACCAAGTTAAACAGATGCAGCTCCAAAAAGAGAACTACAGCTGGTATAATTGTATTCTGCCTACCGAGCAGCACTGCTACTATCACCGTGGTCAAGCGAATAGAAAAATCTGTTGCACTTGATTGACCGGCAAAAGAGCCGAACTGCAGCACGCAAATGAATTCCAGGCGATTTGTGCAACACAACACCCGAAAGTGCTGTATGACCAAAATGCTTCATTACAAAGCAAAGAGAGCTTGTGAGAATTTAATGGTACTGAAACGGGCATGCTCCCCGGAATACCAGGGAGCGCAAGGTGCGTTCAAAGATTCGATGATTCACTATATTCTGCAATTCACACTACGTATCGCATTTCGCTGCGTTCTT…	KF225818	SH023933.07FU	417	Fungi	p__Chytridiomycota	c__Chytridiomycetes	o__Spizellomycetales	f__Spizellomycetaceae	g__unidentified	s__Spizellomycetaceae_sp	2	322878 uncultured_Kochiomyces	1.175e-125	0.89	98.5612	0	0	0	0	0	0	0	0	0	0	0	0	0	0	0	0	0	0	0	0	0	0	0	0	0	0	0	0	0	0	0
>a72147	Otu01885	Unclassified	TTAAGTTCAGCGGGTTTTCTTGCCCGATTTCAGACCAAGTTATCAGTGAAAGCTGATTGTATACAATCAACCTTACTTAATAGGTTTGAGTACGAAAACACCATGCTATAACACTGATTATTAAAATGAAATAGATAAATCTGTTGCACTTTTGATAACCAATGTTAATAAACAAGGCGCACATACAATCACTTTGAAATGTTTGCACACAGAGTGCAAAACATCCACATCCACCTGCCAATATGCCCGAAAGCAAATTGACTTGTGAGATTTTAATGATTCTGAAACGGGCATGCTCCCCGGAATACCAGGAAGCGCAAGGTGCGTTCAAAGATTCGATGATTCACTGAATTCTGCAATTCACACTACTTATCGCATTTCGCTGCGTTCTTCATCGTT…	GU055593	SH481143.07FU	410	Fungi	p__Chytridiomycota	c__Chytridiomycetes	o__Spizellomycetales	f__unidentified	g__unidentified	s__Spizellomycetales_sp	19	331015 uncultured_Spizellomycetales	1.39516e-83	0.79	98.5366	0	0	0	0	0	0	0	0	0	0	0	0	0	0	0	0	0	0	0	0	0	0	0	0	0	0	0	0	0	0	0
>c92654	Otu02526	Unclassified	TTAAGTTCAGCGGGTTTTCTTGCCCGATTTCAGACCAAGTTATCAAAGACATGATTGCAAGCAATCTACATCTTTTAATATAAAGAGTATCCACAACCAGTTTTGACATCGCTTACCCAAAGAGAATAGATAAATCTGTTGCACTTTTAAGATAACCGAGGGTAAAAATACGGCGCACATACAATAAATTTAAGATGATTGCGAAAAGCAAAACATCCAAATCCACCTGCCAAATGAGCCCGAAAGCTGACAATAAGGCTTGTGAGATTTTAATGATTCTGAAACGGGCATGCTCCCTGGAATACCAGGAAGCGCAATGTGCGTTCAAAGATTTGATGATTCACTGAATTCTGCAATTCACACTACTTATCGCATTTCGCTGCGTTCTTCATCGTTGAC…	GU055593	SH481143.07FU	407	Fungi	p__Chytridiomycota	c__Chytridiomycetes	o__Spizellomycetales	f__unidentified	g__unidentified	s__Spizellomycetales_sp	7	331015 uncultured_Spizellomycetales	2.95017e-82	0.79	98.5258	0	0	0	0	0	0	0	0	0	0	0	0	0	0	0	0	0	0	0	0	0	0	0	0	0	0	0	0	0	0	0
>a1196	Otu02287	Unclassified	TTAAGTTCAGCGGGTTTTCTTGCCCGATTTCAGACCAAGTTATCAGTGAAGGCTGATCATACAATCAACATCACTTAATAGTTTTGAGTATGAAAATACCATGTTATAACACTGATTATTAAAATGAAATAGATAAATCTGTTGCACTTTTGATAACCAATGTTAATAAACAAGGCGCACATACAATCACTTTAAAATGTTTGCACAGAATGCAAAACATCCACATCCACCTGTCAAGATGCCCGAAAGCAAATTGACTTGTGAGATTTTAATGATTCTGAAACGGGCATGCTCCCCGGAATACCAGGAAGCGCAATGTGCGTTCAAAGATTCGATGATTCACTGAATTCTGCAATTCACACTACTTATCGCATTTCGCTGCGTTCTTCATCGATGACG…	GU055593	SH481143.07FU	406	Fungi	p__Chytridiomycota	c__Chytridiomycetes	o__Spizellomycetales	f__unidentified	g__unidentified	s__Spizellomycetales_sp	5	331015 uncultured_Spizellomycetales	8.40926e-86	0.79	98.5222	0	0	0	0	0	0	0	0	0	0	0	0	0	0	0	0	0	0	0	0	0	0	0	0	0	0	0	0	0	0	0
>b13123	Otu00240	Unclassified	TTAAGTTCAGCGGGTTTTCTTGCTCGATTTCAGACCAAGTTATCAGAAGTAGCATCATACTGATGCTGCAGCTGTAATAATTTGGAGCACATACAACCAATCAAAGCACGAAAGGCTTCCCAAAGAGTAAAGAAAAAATCTGTTGCACTTTGGTTCGCCAATCAGTCGATTGGGGTACACACAATGAATTTCAGAATGATTTGCTTAAACAAATAAGCAAAACACATCCAAATCCACACACACATCATGTTCAGTGAGAACACAATGGGTGGTGAGATTGTAATGATTCTGAAACGAGCATGCTCCCCGGAATACCAGGAAGCGCAATGTGCGTTCAAAGATTCGATGATTCACTGAATTCTGCAATTCACACTACTTATCGCATTTCGCTGCGTTCTT…	GU055593	SH481143.07FU	417	Fungi	p__Chytridiomycota	c__Chytridiomycetes	o__Spizellomycetales	f__unidentified	g__unidentified	s__Spizellomycetales_sp	2	331015 uncultured_Spizellomycetales	8.41582e-82	0.79	98.5612	0	0	0	0	0	0	0	0	0	0	0	0	0	0	0	0	0	0	0	0	0	0	0	0	0	0	0	0	0	0	0
>b138946	Otu03928	Unclassified	TTAAGTTCAGCGGGTTTTCTTGCCCGATTTCAGACCAAGTTATCAGTGAAGGCTGATTGTATACAATCAACATCACTTAATAGGTTTGAGTACGAAAACACCATACTATAACACTGATTACTAAAATGAAATAGATAAATCTGTTGCACTTTTGATAACCAATGTTAATAAACAAGGTGCACATACAATCACTTTGAAATGTTTACATGCAGAGTACAAAACATCCACATCCACCTGCCAATATGCCCGAAAGCAAATTGACTTGTGAGATTTTAATGATTCTGAAACGGGCATGCTCCCCGGAATACCAGGAAGCGCAAGGTGCGTTCAAAGATTTGATGATTCACTGAATCCTGCAATTCACACTACTTATCGCATTTTGCTGCGTTCTTCATCGTT…	GU055593	SH481143.07FU	410	Fungi	p__Chytridiomycota	c__Chytridiomycetes	o__Spizellomycetales	f__unidentified	g__unidentified	s__Spizellomycetales_sp	2	331015 uncultured_Spizellomycetales	2.28836e-81	0.78	98.5366	0	0	0	0	0	0	0	0	0	0	0	0	0	0	0	0	0	0	0	0	0	0	0	0	0	0	0	0	0	0	0
>a28371	Otu02065	Unclassified	TTAAGTTCAGCGGGTTTTCTTGCCCGATTTCAGACCAAGTTATCAGATGCACACTCCCACGGAAGTGTCCAGCCGTTAAATTAGGTTGGAGTTCGCGCCTCCGACCCGTCGAGCCTGCCTCATCGTGAATAGATAGTCTCTGTTGCACTTTGAGGGCAAACCGACGTGTTCGGCAGCACGCACAATCATTTTCAGACGATTGCGCCCGAAGGCACAAAGACATCCAGCGTCCACTCGTCGCCAGGTGTTTGCACACCAAGGTCTGAGTGAGATACTTTATGATTCTGAAACGGGCATGCCCCCCGGAATACCAGGGGGCGCAATGTGCGTTCAAAGATTCGATGATTCACTGAATTCTGCAATTCACACTACTTATCGCATTTCGCTGCGTTCTTCATC…	GQ499376	SH222295.07FU	413	Fungi	p__Chytridiomycota	c__Chytridiomycetes	o__Spizellomycetales	f__Spizellomycetaceae	g__Triparticalcar	s__Triparticalcar_sp	8	310478 Triparticalcar_sp_JEL_350	1.49507e-91	0.82	98.5472	0	0	0	0	0	0	0	0	0	0	0	0	0	0	0	0	0	0	0	0	0	0	0	0	0	0	0	0	0	0	0
>a83361	Otu02063	Unclassified	TTAAGTTCAGCGGGTTTTCTTGCCCGATTTCAGACCAAGTTATCGGATGCACACCCCCCACGGGAGTGTCCAGCCGTTGAATTGGGTTGGAGTCCGCGCCTCCGACCCGTCAAGCCTGCCTCGTCGTGAATAGATAGTCTCTGTTGCACTTTGAGGGCAAACCGACGTGTTCGGCAGCACGCACAATCATTTTCAGACGATTGCACCCGAAGGCACAAAGAAACGTCCAGCGTCCACTCGTCTCCAGGCGTTTGCACACCCAGGGTCAGAGTGAGATACTTGATGATTCTGAAACGGGCATGCCCCCCGGAATACCAGGGGGCGCAATGTGCGTTCAAAGATTCGATGATTCACTGAATTCTGCAATTCACACTACTTATCGCATTTCGCTGCGTTCTT…	GQ499376	SH222295.07FU	417	Fungi	p__Chytridiomycota	c__Chytridiomycetes	o__Spizellomycetales	f__Spizellomycetaceae	g__Triparticalcar	s__Triparticalcar_sp	5	310478 Triparticalcar_sp_JEL_350	8.67507e-86	0.8	98.5612	0	0	0	0	0	0	0	0	0	0	0	0	0	0	0	0	0	0	0	0	0	0	0	0	0	0	0	0	0	0	0
>a11586	Otu01303	Plant pathogen	TTAAGTTCAGCGGGTATCCCTACCTGATCCGAGGTCAAGAGTGTAAAAAAGTACTTTTGGACGTCGTCGTTATGAGTGCAAAGCGCGAGATGTACTGCGCTCCGAAATCAATACGCCGGCTGCCAATTGTTTTGAGGCGAGTCTACGCGCAGAGGCGAGACAAACACCCAACACCAAGCAGAGCTTGAAGGTACAAATGACGCTCGAACAGGCATGCCCCATGGAATACCAAGGGGCGCAATGTGCGTTCAAAGATTCGATGATTCACTGAATTCTGCAATTCACACTACTTATCGCATTTCGCTGCGTTCTTCATCGTTGACGAGTCTAG	EU479803	SH206477.07FU	331	Fungi	p__Ascomycota	c__Dothideomycetes	o__Pleosporales	f__Pleosporaceae	g__Alternaria	s__Alternaria_sp	485	303666 Alternaria_sp	3.33896e-130	0.99	96.6767	0	0	0	0	0	0	2	0	0	0	0	0	0	0	0	0	4	5	0	0	0	0	0	0	28	0	2	0	2	0	0
>a43960	Otu01543	Plant pathogen	TTAAGTTCAGCGGGTATCCCTACCTGATCCGAGGTCAAAAGTTGAAAAAAGGCTTAATGGATGCTAGACCTTTGCTGATAGAGAGTGCGACTTGTGCTGCGCTCCGAAACCAGTAGGCCGGCTGCCAATTACTTTAAGGCGAGTCTCCAGCAAAGCTAGAGACAAGACGCCCAACACCAAGCAAAGCTTGAGGGTACAAATGACGCTCGAACAGGCATGCCCTTTGGAATACCAAAGGGCGCAATGTGCGTTCAAAGATTCGATGATTCACTGAATTCTGCAATTCACACTACTTATCGCATTTCGCTGCGTTCTTCATCGATGACGAGTCTAG	KC146356	SH215493.07FU	334	Fungi	p__Ascomycota	c__Dothideomycetes	o__Pleosporales	f__Pleosporaceae	g__Alternaria	s__Alternaria_sp	66	307431 Alternaria_eichhorniae	3.4795e-134	1	96.7066	0	0	0	0	0	0	0	0	0	0	0	0	0	0	0	0	0	27	0	0	0	0	0	0	0	0	0	0	0	0	0
>d142050	Otu01563	Plant pathogen	TTAAGTTCAGCGGGTATCCCTACCTGATCCGAGGTCAAGAGTGTAAAAATGTACTTTTGGACGTCGCCGTTATGAGTGCAAAGCGCGAGATGTACTGCGCTCCGAAATCAATACGCCGGCTGCCAATTGTTTTGAGGCGAGTCTACACGCAAAGGCGAGACAAACACCCAACACTAAGCAGAGCTTGAAGGTACAAATGACGCTCGAACAGGCATGCCCTATGGAATACCAAGGGGCGCAATGTGCGTTCAAAGATTCGATGATTCACTGAATTCTGCAATTCACACTACTTATCGCATTTCGCTGCGTTCTTCATCGATGACGAGTCTAG	EU479803	SH206477.07FU	331	Fungi	p__Ascomycota	c__Dothideomycetes	o__Pleosporales	f__Pleosporaceae	g__Alternaria	s__Alternaria_sp	41	303666 Alternaria_sp	2.56786e-129	0.98	96.6767	0	0	0	0	0	0	0	0	0	0	0	0	0	0	0	0	0	0	0	0	0	0	0	0	0	0	0	0	0	0	0
>a2317	Otu01236	Plant pathogen	TTAAGTTCAGCGGGTATCCCTACCTGATCCGAGGTCAAGAGTGTAAAAATGTACTTTTGGACGTCGTCGTTATGAGTGCAAAGCGCGAGATGTACTGCGCTCCGAAATCAATACGCCGGCTGCCAATTGTTTTGAGGCGAGTCTACACGCAAAGGCGAGACAAACACCCAACACCAAGCAGAGCTTGAAGGTACAAATGACGCTCGAACAGGCATGCCCCATGGAATACCAAGGGGCGCAATGTGCGTTCAAAGATTCGATGATTCACTGAATTCTGCAATTCACACTACTTATCGCATTTCGCTGCGTTCTTCATCGATGACGAGTCTAG	EU479803	SH206477.07FU	331	Fungi	p__Ascomycota	c__Dothideomycetes	o__Pleosporales	f__Pleosporaceae	g__ Didymellaceae_sp	s__Didymellaceae_sp	2884	303666 Alternaria_sp	5.64533e-132	0.99	96.6767	0	5	0	2	0	2	0	4	2	0	0	0	6	0	6	8	3	37	3	0	4	0	0	4	5	7	40	9	3	0	0
>a721	Otu01522	Plant pathogen	TTAAGTTCAGCGGGTATCCCTACCTGATCCGAGGTCAAACGTTGAAAAAGTGGCTTCATGGACGCGGACCGCTGCTGGAAGAAGCGCAAATTTGTGCTGCGCTCCGAAACCAGTAGGCCGGCTGCCAATGATTTTAAGGCGAGTCGCTGGCGGACCAGAGACAAAAACGCCCAACACCAAGCAAAGCTTGAGGGTACAAATGACGCTCGAACAGGCATGCCCTTTGGAATACCAAAGGGCGCAATGTGCGTTCAAAGATTCGATGATTCACTGAATTCTGCAATTCACACTACTTATCGCATTTCGCTGCGTTCTTCATCGATGACGAGTCTAG	FJ868975	SH189947.07FU	334	Fungi	p__Ascomycota	c__Dothideomycetes	o__Pleosporales	f__Pleosporaceae	g__Drechslera	s__Drechslera_sp	78	296581 Drechslera_sp_BAFC_3419	2.67595e-133	0.99	96.7066	0	5	0	0	5	3	0	2	0	0	0	0	0	0	0	0	0	0	0	0	6	0	0	0	0	0	0	0	0	0	0
>a6474	Otu01280	Plant pathogen	TTAAGTTCAGCGGGTATCCCTACCTGATCCGAGGTCAAAAGTGAAAAAGGCTTGTGGAAGCTGGTGTATAGCCTTGAATCGCGACTTGTGCTGCGCTTCAAAACCAAACACTGGCTGCCAATTACTTTAAGGCGAGTCCCTCAGGACAAACACCCAACACCAAGCAAAGCTTGAAGGTACAAATGACGCTCGAACAGGCATGCCCCATGGAATACCAAGGGGCGCAATGTGCGTTCAAAGATTCGATGATTCACTGAATTCTGCAATTCACACTACTTATCGCATTTCGCTGCGTTCTTCATCGATGACGAGTCTAG	KF251165	SH208737.07FU	317	Fungi	p__Ascomycota	c__Dothideomycetes	o__Pleosporales	f__Incertae_sedis	g__Paraphoma	s__Paraphoma_sp	704	304628 Paraphoma_chrysanthemicola	6.55538e-125	1	95.2681	0	26	0	4	8	2	5	9	5	9	7	4	6	7	8	8	6	32	3	3	4	0	2	4	6	7	8	6	4	4	3
>a85395	Otu01398	Plant pathogen	TTAAGTTCAGCGGGTATCCCTACCTGATCCGAGGTCAAAAGTGAAAAAGGCTTGTGGAAGCGGGCGTATAGCTTTGAATCGCGACTTGTGCTGCGCTTCAAAACCAAACACTGGCTGCCAATTACTTTAAGGCGAGTCCCTCAGGACAAACACCCAACACCAAGCAAAGCTTGAAGGTACAAATGACGCTCGAACAGGCATGCCCCATGGAATACCAAGGGGCGCAATGTGCGTTCAAAGATTCGATGATTCACTGAATTCTGCAATTCACACTACTTATCGCATTTCGCTGCGTTCTTCATCGGTGACGAGTCTAG	KJ702587	SH025130.07FU	317	Fungi	p__Ascomycota	c__Dothideomycetes	o__Pleosporales	f__Incertae_sedis	g__Paraphoma	s__Paraphoma_sp	155	323462 Paraphoma_sp_BJ11	8.52388e-126	0.99	96.53	0	4	0	0	0	0	3	2	0	3	2	0	2	2	2	3	3	7	2	0	0	0	2	0	0	0	0	2	2	0	0
>b30543	Otu01654	Plant pathogen	TTAAGTTCAGCGGGTATCCCTACCTGATCCGAGGTCAACCTTTGAAAGATTTAACGGCCGCGGCCGCCCGCACTCCGAAGCGATTAATGAAATCACAACGCTTAGAGACGGACAGCTCAGCCGGAGACTTTGAGGCGCGCGGATTGACCGCGGCGCCCAATACCAAGCCAGGCTTGAGTGGTGAAATGACGCTCGAACAGGCATGCCCTTCGGAATACCAAAGGGCGCAATGTGCGTTCAAAGATTCGATGATTCACTGAATTCTGCAATTCACATTACTTATCGCATTTCGCTGCGTTCTTCATCGTTGACGAGTCTAG	KF251233	SH406107.07FU	320	Fungi	p__Ascomycota	c__Dothideomycetes	o__Capnodiales	f__Mycosphaerellaceae	g__Septoria	s__Septoria_cretae	38	311527 Septoria_cretae	1.41423e-123	0.99	95.3125	0	0	0	0	0	0	0	0	0	0	0	0	0	0	0	0	0	0	0	0	0	0	0	0	0	0	0	0	0	0	0
>a87668	Otu02722	Saprotroph	TTAAGTTCAGCGGGTATCCCCGCCTGATCCGAGGCCAAGCGTTGCGTGTGTGGTGGCTGTTGCCAGCCGGTTGGGCGGGCGGTCCCCCCGCGCCGTCGTAACGAGCGCGACGATCGGGGCGAAGGGCCACCGCCAACGGGTTCCGGGGGGGTCGCGCGCGAGGCGCGACGTCCCCCAACACCAAGCGAGGCTTGACGGGTGCAATGACGCTCGGACAGGCGTGCCCGTCGGAATGCCGACGGGCGCAATGTGCGTTCAAAGATTCGATGATTCACTGAATTCTGCAATTCACATTACGTATCGCATTTCGCTGCGTTCTTCATCGGTGACGAGTCTAG	AB116533	SH215548.07FU	338	Fungi	p__Ascomycota	c__Dothideomycetes	o__Incertae_sedis	f__Eremomycetaceae	g__Arthrographis	s__Arthrographis_sp	4	307448 Arthrographis_kalrae	3.22265e-122	0.95	96.7456	0	0	0	0	0	0	0	0	0	0	0	0	0	0	0	0	0	0	0	0	0	0	0	0	0	0	0	0	0	0	0
>b93155	Otu02739	Saprotroph	TTAAGTTCAGCGGGTATCCCTACCTGATCCGAGGTCAACCATAAAGAGTGTGGGTTCTGGCAGGCCACCGCAGGACCCTGGAGCGAGACGAGTACTACGCTTAGGGCCAGACGGCACCGCCACTGGGTTTAGGGCCGGCCGCAGCGGGCGGGACCCAACACCAAGCAGAGCTTGAGGGTTGTAATGACGCTCGAACAGGCATGCCCCGCGGAATACCACGGGGCGCAATGTGCGTTCAAAGATTCGATGACTCACTGAATTCTGCAATTCGCATTACTTATCGCATTTCGCTGCGTTCTTCATCGGTGACGAGTCTAG	AF062817	SH029376.07FU	318	Fungi	p__Ascomycota	c__Dothideomycetes	o__Incertae_sedis	f__Myxotrichaceae	g__Byssoascus	s__Byssoascus_sp	2	325539 Byssoascus_striatisporus	2.90383e-118	0.97	96.5409	0	0	0	0	0	0	0	0	0	0	0	0	0	0	0	0	0	0	0	0	0	0	0	0	0	0	0	0	0	0	0
>a66653	Otu01676	Saprotroph	TTAAGTTCAGCGGGTATCCCTACCTGATCCGAGGTCAAACTATAGAGGGCTTGCTGGACGCCGATCCACCATAGCTTCGGGAAGCGCAAATGTGCTGCGCTAGAAGCTGGCACGACCGCTGCCAATAGCTTTAGGGCGAGTCCACGCACGGAGGCGGGACAGACACCCAACACCAAGCAGAGCTTGAGGGTGATAATGACGCTCGAACAGGCATGCCCCACGGAATACCGAGGGGCGCAATGTGCGTTCAAAGATTCGATGATTCACGGAATTCTGCAATTCACACTACTTTTCGCATTTCGCTGCGTTCTTCATCGATGACGAGTCTAG	EF635655	SH180772.07FU	330	Fungi	p__Ascomycota	c__Dothideomycetes	o__Pleosporales	f__Corynesporascaceae	g__Corynespora	s__Corynespora_sp	29	292515 Corynespora_sp	1.90883e-124	0.97	96.6667	0	0	0	0	0	0	0	0	0	0	0	0	0	0	0	0	0	0	0	0	0	0	0	0	0	0	0	0	0	0	0
>c107037	Otu02597	Saprotroph	TTAAGTTCAGCGGGTATCCCTACCTGATCCGAGGTCAACCATAGAAAGTTGGGGGTTCTGGCGCGGACCCTCCAGACCCTATAGCGAGAAGAATTACTACGCTTAGAGCCGAAGGGCACTGCCACTGATTTTAAGAGCTGCGCGGACGCATGCTCCAACACCAAGCGAGGCTTGAGGGTTATAATGACGCTCGAACAGGCATGCCCCCCGGAATACCAAGGGGCGCAATGTGCGTTCAAAGATTCGATGATTCACTGAATTCTGCAATTCACATTACTTATCGCATTTCGCTGCGTTCTTCATCGTTGACGAGTCTAG	KC989067	SH198136.07FU	318	Fungi	p__Ascomycota	c__Dothideomycetes	o__Capnodiales	f__Antennulariellaceae	g__Heteroconium	s__Heteroconium_sp	7	300339 Heteroconium_sp_115_114E	8.30095e-122	0.98	96.5409	0	0	0	0	0	0	0	0	0	0	0	0	0	0	0	0	0	0	0	0	0	0	0	0	0	0	0	0	0	0	0
>a82553	Otu01396	Saprotroph	TTAAGTTCAGCGGGTATCCCTACCTGATCCGAGGTCAAAAGTGATAAAAAGGCTTAATGGATGCTAGTATTCAAGGGAGTAAGACGCAAAATGTGCTGCGCTTAAAACCAAAACACTGGCTGCCAATTGCTTTAAGGCGAGTCCAAACGCAATGGAGAGGACAAACACCCAACACCAAGCATAGCTTGAGGGTACAAATGACGCTCGAACAGGCATGCCCCATGGAATACCATGGGGCGCAATGTGCGTTCAAAGATTCGATGATTCACTGAATTCTGCAATTCACACTACTTATCGCATTTCGCTGCGTTCTTCATCGGTGACGAGTCTAG	KC694154	SH183008.07FU	332	Fungi	p__Ascomycota	c__Dothideomycetes	o__Pleosporales	f__Phaeosphaeriaceae	g__Ophiosphaerella	s__Ophiosphaerella_sp	173	293432 Ophiosphaerella_sp	2.04311e-132	0.99	96.6867	0	0	2	2	0	0	3	2	0	2	0	0	7	0	0	2	0	0	4	0	0	5	7	0	8	2	0	3	0	0	0
>b17115	Otu01833	Saprotroph	TTAAGTTCAGCGGGTATCCCTACCTGATCCGAGGTCAAACGTGATAAAAGGCTTAATGGGTGCCTATAGAATAAGTAGTAAGACGCAAAATGTGCTGCGCTCAAAACCAAATATAGGCTGCCAATCGCTTTAAGGCGAGTCCAAACGCAGAGAGAGGACAAACACCCAACACCAAGCATAGCTTGAAGGTACAAATGACGCTCGAACAGGCATGCCCCATGGAATACCAAGGGGCGCAATGTGCGTTCAAAGATTCGATGATTCACTGAATTCTGCAATTCACACTACTTATCGCATTTCGCTGCGTTCTTCATCGATGACGAGTCTAG	EU516981	SH005858.07FU	329	Fungi	p__Ascomycota	c__Dothideomycetes	o__Pleosporales	f__Phaeosphaeriaceae	g__Ophiosphaerella	s__Ophiosphaerella_sp	17	314319 Ophiosphaerella_sp	5.60412e-132	1	96.6565	0	0	0	0	0	0	0	0	0	0	0	0	0	0	0	0	2	0	0	0	0	0	0	0	0	0	0	0	0	0	0
>a44655	Otu01482	Saprotroph	TTAAGTTCAGCGGGTATCCCTACCTGATCCGAGGTCAAAGACGGTAATGTTGCTTCGTGGACGCAGGCCGCACCTCCTACCAACGCAATTGTGCTGCGCGAGAGGAGGCAAGGACCGCTGCCAATGAATTTGGGGCGAGTCGGCGCGCAGAGGCGGGACAGACGCCCAACACCAAGCATAGCTTGAGGGTGTAGATGACGCTCGAACAGGCATGCCCCATGGAATACCAAGGGGCGCAATGTGCGTTCAAAGATTCGATGATTCACTGAATTCTGCAATTCACACTACTTATCGCATTTCGCTGCGTTCTTCATCGATGACGAGTCTAG	HQ631065	SH186955.07FU	329	Fungi	p__Ascomycota	c__Dothideomycetes	o__Pleosporales	f__Montagnulaceae	g__Paraphaeosphaeria	s__Paraphaeosphaeria_sp	114	295177 Paraphaeosphaeria_sp_TMS_2011	3.11943e-122	0.95	99.696	0	0	0	0	0	0	0	0	0	0	0	0	0	0	0	0	0	0	0	0	0	0	0	0	0	0	0	0	0	0	0
>a12753	Otu02153	Saprotroph	TTAAGTTCAGCGGGTATCCCTACCTGATCCGAGGTCAAAGACGGTAATGTTGCTTCGTGGACGCGGGCCACGCCCCCCCGCAGACGCAATTGTGCTGCGCGAGAGGAGGCAAGGACCGCTGCCAATGAATTTGGGGCGAGTCCGCGCGCGAAGGCGGGACAGACGCCCAACACCAAGCAGAGCTTGAGGGTGTAGATGACGCTCGAACAGGCATGCCCCATGGAATACCAAGGGGCGCAATGTGCGTTCAAAGATTCGATGATTCACTGAATTCTGCAATTCACACTACTTATCGCATTTCGCTACGTTCTTCATCGATGACGAGTCTAG	HQ631065	SH186955.07FU	330	Fungi	p__Ascomycota	c__Dothideomycetes	o__Pleosporales	f__Montagnulaceae	g__Paraphaeosphaeria	s__Paraphaeosphaeria_sp	2	295177 Paraphaeosphaeria_sp_TMS_2011	1.51323e-127	0.96	99.697	0	0	0	0	0	0	0	0	0	0	0	0	0	0	0	0	0	0	0	0	0	0	0	0	0	0	0	0	0	0	0
>c94562	Otu01634	Saprotroph	TTAAGTTCAGCGGGTATCCCTACCTGATCCGAGGTCAAAAGTGTTAAAAAGGCTTGTTGGTCGCTAATACTCTTGGAGGAAATTGCAAAATGTGCTGCGCTTTCTACCAAAACAATGGCTGCCAATTATTTTAAGGCGAGTCCAAGCAATAAAGCAAAGGACAAACACCCAACACCAAGCATAGCTTGAGGGTACAAATGACGCTCGAACAGGCATGCCCCATGGAATACCAAGGGGCGCAATGTGCGTTCAAAGATTCGATGATTCACTGAATTCTGCAATTCACACTACTTATCGCATTTCGCTGCGTTCTTCATCGATGACGAGTCTAG	KF251183	SH200465.07FU	332	Fungi	p__Ascomycota	c__Dothideomycetes	o__Pleosporales	f__Phaeosphaeriaceae	g__Phaeosphaeria	s__Phaeosphaeria_sp	62	301262 Phaeosphaeria_juncicola	5.33234e-124	0.97	95.4819	0	0	0	0	0	0	0	0	0	0	0	0	0	0	0	0	0	0	0	0	0	0	0	0	0	0	0	0	0	0	0
>b85989	Otu02179	Saprotroph	TTAAGTTCAGCGGGTATCCCTACCTGATCCGAGGTCAAAAGTGTTAAAATGCTTATGGGTACCAATAATAAAGATTTGAAAAGCAAATGTGCTGCGCTTCAAACCAAAATACCGGCTGCCAATATATTTAAGGCGAGTCTAGGCAGAGCAAAGACAAACACCCAACACCAAGCAAGGCTTGAGAGTACAAATGACGCTCGAACAGGCATGCCCCATGGAATACCAAGGGGCGCAATGTGCGTTCAAAGATTCGATGATTCACTGAATTCTGCAATTCACACTACTTATCGCATTTCGCTGCGTTCTTCATCGTTGACGAGTCTAG	EU852369	SH208538.07FU	325	Fungi	p__Ascomycota	c__Dothideomycetes	o__Pleosporales	f__Phaeosphaeriaceae	g__Phaeosphaeria	s__Phaeosphaeria_sp	7	304574 Phaeosphaeria_sp	4.7445e-112	0.93	96.6154	0	0	0	0	0	0	0	0	0	0	0	0	0	0	0	0	0	2	0	0	0	0	0	0	0	0	0	0	0	0	0
>a69251	Otu01494	Saprotroph	TTAAGTTCAGCGGGTATCCCTACCTGATCCGAGGTCAAATTCATGGGGGTAGCTTCTGGGAGCCGATCCGTCGGGCCCGAGTTCGCGTTTCTGCTGCGCTCGAAGCCAACGTGCCGGCCGCCAATAGATTTGAGGCGAGTCCGCGCCGTGAGGCAGGACAGACGCCCAACACCAAGCAGAGCTTGAAGGTTTGAATGACGCTCGAACAGGCATGCCCTACGGAATACCATAGGGCGCAATGTGCGTTCAAAGATTCGATGATTCACTGAATTCTGCAATTCACACTACTTATCGCATTTCGCTGCGTTCTTCATCGATGACGAGTCTAG	AY943061	SH184180.07FU	329	Fungi	p__Ascomycota	c__Dothideomycetes	o__Pleosporales	f__Sporormiaceae	g__Preussia	s__Preussia_flanaganii	93	293912 Preussia_flanaganii	4.30991e-131	0.99	96.6565	0	0	0	0	0	0	0	0	0	0	0	0	0	0	0	0	0	0	0	0	0	0	0	0	0	0	0	0	0	0	0
>a142303	Otu01957	Saprotroph	TTAAGTTCAGCGGGTATCCCTACCTGATCCGAGGTCAAAATATGGGGTTGGCTTCTGGGAGCGGATCCACCGTCCTCGAGTTCGCGTTTCTGCTGCGCTCGAAGCCAATGTACCGGCCGCCAATGAATTTGAGGCGAGTCCGCACCCCGGGGGGCGGGACAGACACCCAACACCAAGCGGAGCTTGAAGTTGTAAATGACGCTCGAACAGGCATGCCCTAAGGAATACCAAAGGGCGCAATGTGCGTTCAAAGATTCGATGATTCACTGAATTCTGCAATTCACACTACTTATCGCATTTCGCTGCGTTCTTCATCGGTGACGAGTCTAG	GU909871	SH006639.07FU	330	Fungi	p__Ascomycota	c__Dothideomycetes	o__Pleosporales	f__Sporormiaceae	g__Preussia	s__Preussia_sp	21	314683 Preussia_sp	1.85179e-120	0.95	96.6667	0	0	0	0	0	0	0	0	0	0	0	0	0	0	0	0	0	0	0	0	0	0	0	0	0	0	0	0	0	0	0
>d119093	Otu02322	Saprotroph	TTAAGTTCAGCGGGTATCCCTACCTGATCCGAGGTCAAAAAAGGTGGTTAGCTTCTGGGAGCTGATCCCATGGTCCCGAGTCCGCGTTTCTGCTGCGCTCGAAGCCAAGGTACCGGCCGCCAATGCATTTGAGGCGAGTCCACGCCCGAGGGGGCGGGACAGACGCCCAACACCAAGCTGAGCTTGAGGGTTTAGATGACGCTCGAACAGGCATGCCCTAAGGAATACCAAAGGGCGCAATGTGCGTTCAAAGATTCGATGATTCACTAAATTCTGCAATTCACACTACTTATCGCATTTCGCTACGTTCTTCATCGATGACGAGTCTAG	GU909871	SH006639.07FU	330	Fungi	p__Ascomycota	c__Dothideomycetes	o__Pleosporales	f__Sporormiaceae	g__Preussia	s__Preussia_sp	2	314683 Preussia_sp	4.9819e-116	0.94	96.6667	0	0	0	0	0	0	0	0	0	0	0	0	0	0	0	0	0	0	0	0	0	0	0	0	0	0	0	0	0	0	0
>a1409	Otu01333	Saprotroph	TTAAGTTCAGCGGGTATCCCTACCTGATCCGAGGTCAACCTGAAAAAATTGGGGGTTGCTGGCAAGCACGCACCCGGGTCTCCAAAGCGAGAAGAATTACTACGCTTGAAGCCGAATGGCACCGCCACTGATTTTAAGGCCTGCCGGGACCGGCAGAGCCCAATACCAAGCAGAGCTTGAGGGTTGTAATGACGCTCGAACAGGCATGCCCCCCGGAATACCAGGGGGCGCAATGTGCGTTCAAAGATTCGATGATTCACTGAATTCTGCAATTCACATTACTTATCGCATTTCGCTGCGTTCTTCATCGTTGACGAGTCTAG	AB520863	SH215942.07FU	323	Fungi	p__Ascomycota	c__Dothideomycetes	o__Incertae_sedis	f__Pseudeurotiaceae	g__Pseudeurotium	s__Pseudeurotium_sp	358	307606 Pseudeurotium_sp_MF_5	5.15783e-124	0.98	96.5944	0	0	0	0	0	0	0	0	0	0	0	0	0	0	0	0	0	0	0	0	0	0	0	0	0	0	0	0	0	0	0
>a26215	Otu01607	Saprotroph	TTAAGTTCAGCGGGTATCCCTACCTGATCCGAGGTCAAACGCAAGAATAAAAGGCTTGTTGGACGCTCGGCGTATAAAACTAGAGGCTGCAGTTGTGCTGCGTTCCCCAGAATTATTCCGGCTGCCAATCACTTTAAGGCGAGTCCACCACGAGGGCAGGACAAACACCCAACACCAAGACTGAGCTTGAGGGTACAAATGACGCTCGAACAGGCATGCCCCATGGAATACCAAGGGGCGCAATGTGCGTTCAAAGATTCGATGATTCACTGAATTCTGCAATTCACACTACTTTTCGCATTTCGCTGCGTTCTTCATCGATGACGAGTCTAG	JF506840	SH217882.07FU	333	Fungi	p__Ascomycota	c__Dothideomycetes	o__Pleosporales	f__Incertae_sedis	g__Pyrenochaeta	s__Pyrenochaeta_sp	45	308420 Pyrenochaeta_sp	5.68654e-132	0.99	96.6967	0	0	0	0	0	0	0	0	0	0	0	0	0	0	0	0	0	0	0	0	0	0	0	0	0	0	0	0	0	0	0
>a96581	Otu01781	Saprotroph	TTAAGTTCAGCGGGTATCCCTACCTGATCCGAGGTCAAGCGCGAAAATATAGGCTTCATGGACGCCCGCAATCCACAGCGAAGAGCGCAAAATGTGCTGCGCTCAAACACCAGATTGCCGGCTGCCAATTGATTTGAGGCGAGTTCACGCGTTGCAGCGGAACAAACACCCATCACCAAGCAAAGCTTGAGGGTACAAATGACGCTCGAACAGGCATGCCCCATGGAATACCAAGGGGCGCAATGTGCGTTCAAAGATTCGATGATTCACTGAATTCTGCAATTCACACTACTTATCGCATTTCGCTGCGTTCTTCATCGGTGACGAGTCTAG	FJ197875	SH014374.07FU	333	Fungi	p__Ascomycota	c__Dothideomycetes	o__Pleosporales	f__Incertae_sedis	g__Pyrenochaeta	s__Pyrenochaeta_sp	21	318107 Pyrenochaeta_sp	2.5866e-129	0.98	96.6967	0	0	0	0	0	0	0	0	0	0	0	0	0	0	0	0	0	0	0	0	0	0	0	0	0	0	0	0	0	0	0
>c47248	Otu02876	Saprotroph	TTAAGTTCAGCGGGTATCCCTACCTGATCCGAGGTCAAAATAAAAGAATAGGCTTATGGGAGCCGATCCACCGGGCTCGAGACCGCGTTTCTGCTGCGCTCGAAGCCAATGTACCGGCCGCCAATGTTTTTGAGGCGAGTCCCCCCGCGAGGGGAGGACAGTCACCCATCACCAGGCTGAGCTTGAAGGTTTAAATGACGCTCGAACAGGCATGCCCTAAGGAATACCAAAGGGCGCAATGTGCGTTCAAAGATTCGATGATTCACTGAATTCTGCAATTCACACTACTTATCGCATTTCGCTGCGTTCTTCATCGATGACGAGTCTAG	FJ210521	SH184177.07FU	329	Fungi	p__Ascomycota	c__Dothideomycetes	o__Pleosporales	f__Sporormiaceae	g__unidentified	s__Sporormiaceae_sp	4	293909 Sporormiaceae_sp	6.85794e-125	0.99	93.0091	0	0	0	0	0	0	0	0	0	0	0	0	0	0	0	0	0	0	0	0	0	0	0	0	0	0	0	0	0	0	0
>a50198	Otu03576	Unclassified	TTAAGTTCAGCGGGTATCCCTACCTGATCCGAGGTCAAGAGTGTAAAATAGTCTTGATGGACGCCGCCGTACCAGGACACAGAGCGCGATTTGTGCTGCGCTCCGAAACCTAGACGTCGGCTGCCAATTGCTTTAAGGCGAGTCCGCGCACAAAGGCGGGACAAACACCCAACACCAAGCAGAGCTTGAAGGTACAAATGACGCTCGAACAGGCATGCCCTATGGAATACCATAGGGCGCAATGTGCGTTCAAAGATTCGATGATTCACTGAATTCTGCAATTCACACTACTTATCGCATTTCGCTGCGTTCTTCATCGATGACGAGTCTAG	GU054291	SH215821.07FU	332	Fungi	p__Ascomycota	c__Dothideomycetes	o__Pleosporales	f__Incertae_sedis	g__Ascochyta	s__Ascochyta_sp	2	307551 Ascochyta_sp	2.65663e-133	1	96.6867	0	0	0	0	0	0	0	0	0	0	0	0	0	2	0	0	0	0	0	0	0	0	0	0	0	0	0	0	0	0	0
>b108853	Otu01757	Unclassified	TTAAGTTCAGCGGGTATCCCTACCTGATCCGAGGTCAACCTTTGATAGAAATTTTAGCGGCGCGGACCGCCCTTCTCGCCAGCGAATTGAATGCCACAACGCTGAGATACGGGTTGTCCAGCCGGTGAAATTGAGGCGTAGGGGAGCCCTACCGCCCAATACCAAGCCAGGCTTGAGTGGTGTAATGACGCTCGAACAGGCATGCCCCTCGGAATGCCAAAGGGCGCAATGTGCGTTCAAAGATTCGATGATTCACTGAATTCTGCAATTCACATTACTTATCGCATTTCGCTGCGTTCTTCATCGTTGACGAGTCTAG	EU754974	SH016853.07FU	319	Fungi	p__Ascomycota	c__Dothideomycetes	o__Capnodiales	f__unidentified	g__unidentified	s__Capnodiales_sp	14	319249 Capnodiales_sp	8.58945e-126	0.99	96.5517	0	0	0	0	0	0	0	0	0	0	0	0	0	0	0	0	0	0	0	0	0	0	0	0	0	0	0	0	0	0	0
>c62365	Otu03566	Unclassified	TTAAGTTCAGCGGGTATCCCTACCTGATCCGAGGTCAACCTGAGATGGCGCCGGAGCGCGGTTTCGGTCGGCCGCCGACCCGCGAGTCCCACAGCGAATGGTGTGTCCACAACGCTGGGTTCGACGAGGTCGCAGCCGGAGAAATTCAGGCGGGGGGGTTCCCCCCCGTCGCCCAATACCAAGCCAGGCTTGAGTGGTGTAATGACGGTCGAACAGGCATGCCCCCCGGAATACCAGGGGGCGCAATGTGCGTTCAAAGATTCGATGATTCACTGAATTCTGCAATTCACATTACTTATCGCATTTCGCTGCGTTCTTCATCGATGACGAGTCTAG	EU019278	SH214173.07FU	336	Fungi	p__Ascomycota	c__Dothideomycetes	o__Capnodiales	f__unidentified	g__unidentified	s__Capnodiales_sp	2	306895 Penidiella_venezuelensis	1.81679e-81	0.84	96.7262	0	0	0	0	0	0	0	0	0	0	0	0	0	0	0	0	0	0	0	0	0	0	0	0	0	0	0	0	0	0	0
>c95718	Otu04526	Unclassified	TTAAGTTCAGCGGGTATCCCTACCTGATCCGAGGTCAAAGACGGTGTGGTAGCTTGCTGGACGCGGGCCGCCGGGCCCTCGAGAAGCGCAATGTGCTGCGCGAGAGGGGGCGAGGACCGCTGCCAATGCGTTTGGGGCGAGTCCGCGCGCCGAGGCGGGACAGACGCCCATCACCAAGCAGAGCTTGAGGGTGTAGATGACGCTCGAACAGGCATGCCCCACGGAATACCGAGGGGCGCAATGTGCGTTCAAAGATTCGATGATTCACTGAATTCTGCAATTCACACTACTTATCGCATTTCGCTACGTTCTTCATCGATGACGAGTCTAG	KJ463535	SH008362.07FU	331	Fungi	p__Ascomycota	c__Dothideomycetes	o__Pleosporales	f__Leptosphaeriaceae	g__Coniothyrium	s__Coniothyrium_sp	2	315432 Coniothyrium_sp_HS_1_E1_2	1.13312e-122	0.95	99.6979	0	0	0	0	0	0	0	0	0	0	0	0	0	0	0	0	0	0	0	0	0	0	0	0	0	0	0	0	0	0	0
>a16553	Otu01406	Unclassified	TTAAGTTCAGCGGGTATCCCTACCTGATCCGAGGTCAAGACGTTGAAATAGGCTTCTGGATCGCCGACCCACCCACGTCGTAAGCGCGACTGTGCTGCGCTCGCGGCGGGGGGATGCGGCTGCCAATCAATTTGAGGCGAGTCCACGCGCGGGGGGCGGGACAAACACCCAACACCAAGCTGAGCTTGAAGGTTGAAATGACGCTCGAACAGGCATGCCCTAAGGAATAACCGAAGGGCGCAATGTGCGTTCAAAGATTCGATGATTCGCTGAATTCTGCAATTCACACTACTTATCGCATTTCGCTGCGTTCTTCATCGTTGACGAGTCTAG	JF433009	SH204975.07FU	333	Fungi	p__Ascomycota	c__Dothideomycetes	o__Pleosporales	f__Pleosporaceae	g__Dendryphion	s__Dendryphion_sp	179	303085 Dendryphion_sp	2.66629e-133	0.98	99.6997	0	2	0	0	0	6	0	0	0	2	2	0	0	0	3	0	2	0	0	0	0	0	0	0	4	0	0	0	0	2	0
>a113648	Otu01752	Unclassified	TTAAGTTCAGCGGGTATCCCTACCCGATCCGAGGTCAACCTGTAGTGAGGTTTAACGGCGCGTCCGGTCGTCGTCGCCAGCGAATTGATTGACCACAACGCTGAGATTCGAACCGTCCAGCCGACGAATTGGGGGCGCGGGGGAGGGTCCCCGACGCCCAATACCAAGCCAGGCTTGATTGGTGTAATGACGCTCGAACGGGCATGCCCTTCGGAATGCCAAAGGGCGCAATGTGCGTTCAAAGATTCGATGATTCACTGAATTCTGCAATTCACATTACTTATCGCATTTCGCTGCGTTCTTCATCGGTGACGAGTCTAG	JQ585533	SH192619.07FU	321	Fungi	p__Ascomycota	c__Dothideomycetes	o__Capnodiales	f__Teratosphaeriaceae	g__Devriesia	s__Devriesia_sp	21	297798 Devriesia_sp	1.46334e-127	0.99	96.5732	0	0	0	0	0	0	0	0	0	0	0	0	0	0	0	0	0	2	0	0	0	0	0	0	0	0	0	0	0	0	0
>a84322	Otu01572	Unclassified	TTAAGTTCAGCGGGTATCCCTACCTTATCCGAGGTCAACCTAAGATATGCGCAAAGGCGCGGGTTTGACAGCTGCCTGAGGCCGGTCCTTGGCGAGTTAATTTCTACTACGCTAGAACGCCGTTCTCTCAGCCGCTGATGACTTTGAGGCCCGCCCGCGTGGGGACAGAGGCCCAATACCAAGCAGAGCTTGACGGTTGTAATGACGCTCGAAAAGGCATGCCCCTCGGAATACCGAGGGGCGCAATATGCGTTCAAAGATTCGATGATTCACTGAATTCTGCAATTCACATTACTTATCGCATTTCGCTGCGTTCTTCATCGATGACGAGTCTAG	JX244063	SH197544.07FU	336	Fungi	p__Ascomycota	c__Dothideomycetes	o__Pleosporales	f__Didymosphaeriaceae	g__Didymosphaeria	s__Didymosphaeria_sp	52	300077 Didymosphaeria_sp	7.4745e-133	0.98	98.2143	0	0	0	0	0	0	0	0	0	0	0	0	0	0	0	0	0	0	0	0	0	0	0	0	0	0	0	0	0	0	0
>a10486	Otu01289	Unclassified	TTAAGTTCAGCGGGTATCCCTACCTGATCCGAGGTCAAAAGTGATAAAGGGCTTGATGGATGCTAGTATTACTAGATGCAAGACGCAAAATGTGCTGCGCTCAAAACCAGTATACAGGCTGCCAATGACTTTAAGGCGAGTCCAAACGCAGGGGAGAGGACAAACACCCAACACCAAGCATAGCTTGAAGGTACAAATGACGCTCGAACAGGCATGCCCCATGGAATACCAAGGGGCGCAATGTGCGTTCAAAGATTCGATGATTCACTGAATTCTGCAATTCACACTACTTATCGCATTTCGCTGCGTTCTTCATCGATGACGAGTCTAG	FN392311	SH183014.07FU	331	Fungi	p__Ascomycota	c__Dothideomycetes	o__unidentified	f__unidentified	g__unidentified	s__Dothideomycetes_sp	607	293438 Dothideomycetes_sp	4.3416e-131	0.99	96.6767	0	4	0	3	3	0	0	0	2	0	0	0	0	0	8	0	0	0	0	0	0	0	2	0	0	2	0	0	2	3	0
>a833	Otu01291	Unclassified	TTAAGTTCAGCGGGTATCCCTACCTGATCCGAGGTCAAGCGTAAAATGGTAGACTTGTGGATGCCACCGTCAGCAGTGGAGAGCGCAAAATGTGCTGCGCTCCCACACAGGACGGCGGGCTGCCAATGCATTTGAGGCGAGTTCACGCGCGCAGCGGAACAAAACGCCCAACACCCAGCAGGGCTGGAGGGTACAAATGACGCTCGAACAGGCATGCCCCATGGAATACCAAGGGGCGCAATGTGCGTTCAAAGATTCGATGATTCACTGAATTCTGCAATTCACACTACTTATCGCATTTCGCTGCGTTCTTCATCGATGACGAGTCTAG	DQ420966	SH200447.07FU	331	Fungi	p__Ascomycota	c__Dothideomycetes	o__unidentified	f__unidentified	g__unidentified	s__Dothideomycetes_sp	578	301252 Dothideomycetes_sp	7.34055e-133	1	96.6767	0	6	6	6	0	0	2	0	20	0	9	32	9	0	2	30	2	9	6	2	9	3	7	0	0	8	8	0	0	0	0
>a1231	Otu01457	Unclassified	TTAAGTTCAGCGGGTATCCCTACCTGATCCGAGGTCAAAACTAAGAAAATAAAAGGCTTTCTTAGGCGGGTTATAACCAAAGCCTCCAGAGCGAAAGAAAAAATAACTACGCAAAGAAGTTGATTAGAACCGCCTATGAGTTTCAGGCACATCCTCTTTGAAAAAAAAGTGGATGAAAAGCCCAATACCAAGCAGAAGCTTGAGGGTTGAAATGACGCTCGAACAGGCATGCCCCTCGGAATACCAAAGGGCGCAATGTGCGTTCAAAGATTCGATGATTCACTGAATTCTGCAATTCACATTACTTATCGCATTTCGCTGCGTTCTTCATCGATGACGAGTCTAG	DQ124134	SH209466.07FU	346	Fungi	p__Ascomycota	c__Dothideomycetes	o__unidentified	f__unidentified	g__unidentified	s__Dothideomycetes_sp	119	304930 Dothideomycetes_sp	1.96032e-120	0.94	96.8208	3	0	0	0	0	0	0	0	0	0	0	0	0	3	2	0	0	0	0	0	0	0	0	0	0	0	0	0	0	0	0
>a81733	Otu01690	Unclassified	TTAAGTTCAGCGGGTATCCCTACCTGATCCGAGGTCAAAAGATGTAGAGTAGCTTAATGGTAGGAGGCAAGCTGGAGCCGCTACGCAATGTGCTGCGCGCGAAAGCCAACTGACCGGCTGCCAATAGATTTGAGGCGAGTCCACGCGCGGAGGCGGAACAAACGCCCAACACCAAGCAGAGCTTGAAGGTTTAAATGACGCTCGAACAGGCATGCCCAACGGAATACCGAAGGGCGCAATGTGCGTTCAAAGATTCGATGATTCACTGAATTCTGCAATTCACACTACTTATCGCATTTCGCTGCGTTCTTCATCGATGACGAGTCTAG	DQ420831	SH198670.07FU	329	Fungi	p__Ascomycota	c__Dothideomycetes	o__unidentified	f__unidentified	g__unidentified	s__Dothideomycetes_sp	42	300556 Dothideomycetes_sp	1.96043e-128	0.98	96.6565	6	0	0	0	0	0	0	0	0	0	0	0	0	0	0	0	0	0	8	0	0	0	0	0	0	0	0	0	0	0	0
>b12950	Otu01722	Unclassified	TTAAGTTCAGCGGGTATCCTTGCCTGATCCGAGGTCAAACCATGGGTTGGTTAGGCTTGCTGGAACGCCGGCCGCCCGGCTCGAGGCGCGATCTGCTGCGCTCGAGGACCGGGGCGCCGGCTGCCAATGCTTTTGGGGCGGGTCCGCGCGCGAGGCGGGACGGTCGCCCAAGACCAAGCGGTGCTTGAGTTTTGAGATGACGCTCGAACAGGCATGCCCCAAGGAATGCCAAAGGGCGCAATGTGCGTTCAAAGATTCGATGATTCACGGAATTCTGCAATTCACACTACTTATCGCATTTCGCTGCGTTCTTCATCGATGACGAGTCTAG	HQ389516	SH014773.07FU	331	Fungi	p__Ascomycota	c__Dothideomycetes	o__unidentified	f__unidentified	g__unidentified	s__Dothideomycetes_sp	42	318271 uncultured_Pleosporales	6.11883e-109	0.91	99.6979	0	0	0	0	0	0	0	0	0	0	0	0	0	0	0	0	0	0	0	0	0	0	0	0	0	0	0	0	0	0	0
>b112481	Otu01681	Unclassified	TTAAGTTCAGCGGGTATCCCTACCTGATCCGAGGTCAAAAGATGTAGAGTAGCTTAATGGTAGGAGGCGAGCTGGAGCCGCTACGCAATGTGCTGCGCGCGAAAGCCAACTGACCGGCTGCCAATAGATTTGAGGCGAGTCCACGCGCGGAGGCGGAACAAACACCCAACACCAAGCAGAGCTTGAAGGTTTAAATGACGCTCGAACAGGCATGCCCAACGGAATACCGAAGGGCGCAATGTGCGTTCAAAGATTCGATGATTCACTGAATTCTGCAATTCACACTACTTATCGCATTTCGCTGCGTTCTTCATCGTTGACGAGTCTAG	DQ420831	SH198670.07FU	329	Fungi	p__Ascomycota	c__Dothideomycetes	o__unidentified	f__unidentified	g__unidentified	s__Dothideomycetes_sp	41	300556 Dothideomycetes_sp	8.91729e-126	0.97	96.6565	0	0	0	0	0	0	0	0	0	0	0	0	0	0	0	0	0	0	0	0	0	0	5	0	0	0	0	0	0	0	0
>a32221	Otu01685	Unclassified	TTAAGTTCAGCGGGTATCCCTACCTGATCCGAGGTCAAGCGTAAAATGGTAGACTTTATGGATGCCACCGTCAGCAGTGGAGAGCGCAAAATGTGCTGCGCTCCCACACGGGACGGCGGGCTGCCAATGCATTTGAGGCGAGTTCACGCGCGCAGCGGAACAAACGCCCAACACCCAGCAGGGCTGGAGGGTACAAATGACGCTCGAACAGGCATGCCCCATGGAATACCAAGGGGCGCAATGTGCGTTCAAAGATTCGATGATTCACTGAATTCTGCAATTCACACTACTTATCGCATTTCGCTGCGTTCTTCATCGTTGACGAGTCTAG	EU516846	SH017502.07FU	331	Fungi	p__Ascomycota	c__Dothideomycetes	o__unidentified	f__unidentified	g__unidentified	s__Dothideomycetes_sp	26	319601 Dothideomycetes_sp	5.64533e-132	0.99	96.6767	0	0	0	0	0	0	0	0	0	0	0	0	0	0	0	0	0	0	0	0	3	0	0	0	0	0	0	0	0	0	0
>a35218	Otu01879	Unclassified	TTAAGTTCAGCGGGTATCCCTACCTGATCCGAGGTCAAAAAAAATAAAGATGGGCTTCGTGGACGCAGGCCCCCGACGCCTCAAGAAGCGCAAATGTGCTGCGCGAGAGGCGGTCAGGACCGCTGCCAATGTCTTTGGGGCGAGTCCGTGCGCGGAGGGGGGACAGACGCCCATCACCAAGCAGTGCTTGAGGGTGTAGATGACGCTCGAACAGGCATGCCCCATGGAATACCAAGGGGCGCAATGTGCGTTCAAAGATTCGATGATTCACTGAATTCTGCAATTCACACTACTTATCGCATTTCGCTGCGTTCTTCATCGATGACGAGTCTAG	JX984796	SH008374.07FU	334	Fungi	p__Ascomycota	c__Dothideomycetes	o__unidentified	f__unidentified	g__unidentified	s__Dothideomycetes_sp	22	315444 uncultured_fungus	1.07809e-114	0.92	99.7006	0	0	0	0	0	0	0	0	0	0	0	0	0	0	0	0	0	0	0	0	0	0	0	0	0	0	0	0	0	0	0
>a86626	Otu02150	Unclassified	TTAAGTTCAGCGGGTATCCCTACCTGATCCGAGGTCAAGAGTGTATAAAAAAGGCTTGATGGATGCCAACGTAATAGGCTCTAAAGCGCGAATTGTGCTGCGCTCCAAGGCAAATACGCCGGCTGCCAATCATTTTAAGGCGAGTCCACACACAGAGGCAGGACAAACACCCAACACCAAGCAGTGCTTGAGGGTACAAATGACGCTCGAACAGGCATGCCCCATGGAATACCAAGGGGCGCAATGTGCGTTCAAAGATTCGATGATTCACTGAATTCTGCAATTCACACTACTTATCGCATTTCGCTGCGTTCTTCATCGATGACGAGTCTAG	KF297007	SH019257.07FU	334	Fungi	p__Ascomycota	c__Dothideomycetes	o__unidentified	f__unidentified	g__unidentified	s__Dothideomycetes_sp	13	320484 Dothideomycetes_sp	8.04335e-110	0.92	96.7066	0	0	0	0	0	0	0	0	0	0	0	0	0	0	0	0	0	0	0	0	0	0	0	0	0	0	0	0	0	0	0
>c62298	Otu02074	Unclassified	TTAAGTTCAGCGGGTATCCCTACCTGATCCGAGGTCAAAAGTGATAAAAAGGCTTGATGGACGCCAGTCTACAGGCTTGAATCGCAAAATGTGCTGCGCTCCAAGGCCAATATGCCGGCTGCCAATAACTTTAAGGCGAGTCCAATCGCAAGGATAGGACAAACACCCAGCACCAAGCAGAGCTTGAGGGTACAAATGACGCTCGAACAGGCATGCCCCATGGAATACCATGGGGCGCAATGTGCGTTCAAAGATTCGATGATTCACTGAATTCTGCAATTCACACTACTTATCGCATTTCGCTGCGTTCTTCATCGTTGACGAGTCTAG	FN394707	SH202884.07FU	330	Fungi	p__Ascomycota	c__Dothideomycetes	o__unidentified	f__unidentified	g__unidentified	s__Dothideomycetes_sp	10	302247 Dothideomycetes_sp	1.19962e-130	0.99	96.6667	0	0	0	0	0	0	0	0	0	0	0	0	0	0	0	0	0	0	0	0	0	0	0	0	0	0	0	0	0	0	0
>b46324	Otu01990	Unclassified	TTAAGTTCAGCGGGTATCCTTGCCTGATCCGAGGTCAAACCATGGGTTGGTTAGGCTTGCTGGAACGCCGGCCCCCCCAGCTCGAGGCGCGATCTGCTGCGCTCGAGGACCGGGACGCCGGCTGCCAATGCTTTTGAAGCGGGTCCGCGCGCGAGGCGGGACGGTCGCCCAAGACCAAGCGGTGCTTGAGTTTTGAGATGACGCTCGAACAGGCATGCCCTATGGAATACCAAAGGGCGCAATGTGCGTTCAAAGATTCGATGATTCACGGAATTCTGCAATTCACACTACTTATCGCATTTCGCTGCGTTCTTCATCGTTGACGAGTCTAG	HQ389516	SH014773.07FU	332	Fungi	p__Ascomycota	c__Dothideomycetes	o__unidentified	f__unidentified	g__unidentified	s__Dothideomycetes_sp	8	318271 uncultured_Pleosporales	5.95764e-105	0.9	99.6988	0	0	0	0	0	0	0	0	0	0	0	0	0	0	0	0	0	0	0	0	0	0	0	0	0	0	0	0	0	0	0
>b32898	Otu02058	Unclassified	TTAAGTTCAGCGGGTTTTCCTACCTGATTTGAGACCAAGTTTTCAGAACTAGTTCCAAACGGAACTCTCCCTGAGTATTAAACTGGAGTTGCCCACAAGGCTGAATCAAGATCCAGGTACAAAGTGAAATCATTTAAAAGGAGTTATCCTATTCATGCACTCATTAACCTCGATCACATCAGCGAACAAATGGTCAAACATTAGTTTTAAGGACGTTGCTGCAAAAGCAAATGTCCCAAATCCACTGTGCCCAAGTCTTGTCAAACATTGGTCCGAAAACCAATGTCATCCAATTCTAAAAAGACACGGTGAGTGATTATCGATTCTCAAACAGGCATGCTTACCGGAATACCGGAAAGCGCAATGTGCGTTCAAAGATTTGATGATTCACTGAATTCT…	EU516833	SH475473.07FU	454	Fungi	p__Ascomycota	c__Dothideomycetes	o__unidentified	f__unidentified	g__unidentified	s__Dothideomycetes_sp	8	330227 Dothideomycetes_sp	4.13955e-110	0.83	97.5771	0	0	0	0	0	0	0	0	0	0	0	0	0	0	0	0	0	0	0	0	0	0	0	0	0	0	0	0	0	0	0
>d26937	Otu02589	Unclassified	TTAAGTTCAGCGGGTATCCCTACCTGATCCGAGGTCAAAAAATATAGTAGCTTAATGGTAGGAGGCAAGCTGGAGCCGTCACGCAATGTGCTGCGCACGAAAGCCAACTAACCGGCTGCCAATGAATTTAAGGCGAGTCCACGCGCAGGGGCGGAACAAACGCCCAACACCAAGCAGAGCTTGAAGGTTTAATTGACGCTCGAACAGGCATGCCTAACGGAATACCGAAGGGCGCAATGTGCGTTCAAAGATTCGATGATTCACTGAATTCTGCAATTCACACTACTTATCGCATTTCGCTGCGTTCTTCATCGGTGACGAGTCTAG	DQ420831	SH198670.07FU	327	Fungi	p__Ascomycota	c__Dothideomycetes	o__unidentified	f__unidentified	g__unidentified	s__Dothideomycetes_sp	6	300556 Dothideomycetes_sp	3.00396e-118	0.95	96.6361	0	0	0	0	0	0	0	0	0	0	0	0	0	0	0	0	0	0	0	0	0	0	0	0	0	0	0	0	0	0	0
>a51765	Otu02613	Unclassified	TTAAGTTCAGCGGGTTTTCCTACCTGATTTGAGACCAAGTTTTCAAGATGAGTTCCAAAATGGAACTCTTCCTGAGTTTGAACTGGAGTTGCCCACGAAGCTGAATAACGACCAAAGTACAAAGTGAAATCACAAAGGAGTTATCCTATTCATGCACTCATAACCTTGATCACATCAGCGAACAAATGGTCAAACATTAGTTTTAAGGACGTTGCCACGAAAGCAAGTGTCCCAAATCCACTGTGTCCCAGAGTTTTATCTAGCATCCAGTCCGAAAACCTTTTGCCGTCAAATTCCCAAATGACGCGGTGAGTGATTATCGATTCTCAAACAGGCATGCTTACCGGAATACCGGAAAGCGCAATGTGCGTTCAAAGATTTGATGATTCACTGAATTCT…	EU516833	SH475473.07FU	454	Fungi	p__Ascomycota	c__Dothideomycetes	o__unidentified	f__unidentified	g__unidentified	s__Dothideomycetes_sp	5	330227 Dothideomycetes_sp	8.06054e-97	0.8	97.5771	0	0	0	0	0	0	0	0	0	0	0	0	0	0	0	0	0	0	0	0	0	0	0	0	0	0	0	0	0	0	0
>a69495	Otu02727	Unclassified	TTAAGTTCAGCGGGTATCCCTACCTGATCCGAGGTCAAACTGTGGGGTGGACTTGATGGACGCCGATCCGCCGGAGCCTCGAGAAGCGCAATGTGCTGCGCGAGAAGCTGGCAAGACCGCTGCCAATACCTTTGGGGCGAGTCCGCGCACGAAGCGGGGACAGACGCCCAACACCAAGCAGAGCTTGAGGGTGTAAATGACGCTCGAACAGGCATGCCCCATGGAATACCAAGGGGCGCAATGTGCGTTCAAAGATTCGATGATTCACTGAATTCTGCAATTCACACTACTTATCGCATTTCGCTGCGTTCTTCATCGGTGACGAGTCTAG	FJ553168	SH207011.07FU	331	Fungi	p__Ascomycota	c__Dothideomycetes	o__unidentified	f__unidentified	g__unidentified	s__Dothideomycetes_sp	2	303914 Dothideomycetes_sp	1.16803e-126	0.98	96.6767	0	0	0	0	0	0	0	0	0	0	0	0	0	0	0	0	0	0	0	0	0	0	0	0	0	0	0	0	0	0	0
>b79231	Otu03148	Unclassified	TTAAGTTCAGCGGGTATCCCTACCTGATCCGAGGTCAAACTGGGGTGTGACTTGATGGACGCTGAACCGCCGTGGCCTCGAGAAGCGCAATGTGCTGCGCGGGAGGCGGGCTGGTCCGCTGCCAATACCTTTGGGGCGAGTCCGCGCACGCGGCGGGACAGACGCCCAACACCAAGCAGAGCTTGAGGGGGTAAATGACGCTCGAACAGGCATGCCCCATGGAATACCAAGGGGCGCAATGTGCGTTCAAAGATTCGATGATTCACTGAATTCTGCAATTCACACTACTTATCGCATTTCGCTGCGTTCTTCATCGGTGACGAGTCTAG	KC966087	SH207012.07FU	329	Fungi	p__Ascomycota	c__Dothideomycetes	o__unidentified	f__unidentified	g__unidentified	s__Dothideomycetes_sp	2	303915 Dothideomycetes_sp	4.96365e-116	0.94	96.6565	0	0	0	0	0	0	0	0	0	0	0	0	0	0	0	0	0	0	0	0	0	0	0	0	0	0	0	0	0	0	0
>d93157	Otu03227	Unclassified	TTAAGTTCAGCGGGTTTTCCTACCTGATTTGAGACCAAGTTTTCAGGATTAGTTCCAAAACGGAACTCCACCTGAGTTTGAACTGGAGTTGCCCACGAAGCTGAATAACGACCAAAGTACAAAGTGAAATCACAAAGGAGTTATCCTATTCATGCACTCATAACCTTGATCACATCGGCGAACAAATGGTCAAACATTAGTTTTAAGGACGTTGCCACGAAAGCAAGTGTCCCAAATCCACTGTGTCTCAGAGTTTTATCGAGCATCTGGTCCGAAAACCTTTTGCGGTCAAATTCCCAAAAGACGCGGTGAGTGATTATCGATTCTCAAACAGGCATGCTTACCGGAATACCGGAAAGCGCAATGTGCGTTCAAAGATTTGATGATTCACTGAATTCT…	EU516833	SH475473.07FU	454	Fungi	p__Ascomycota	c__Dothideomycetes	o__unidentified	f__unidentified	g__unidentified	s__Dothideomycetes_sp	2	330227 Dothideomycetes_sp	8.30885e-101	0.81	97.5771	0	0	0	0	0	0	0	0	0	0	0	0	0	0	0	0	0	0	0	0	0	0	0	0	0	0	0	0	0	0	0
>a1702	Otu01282	Unclassified	TTAAGTTCAGCGGGTATCCCTACCTGATCCGAGGTCAAACGTTGAAAAAAGGCTTCATGGACGCCGACGTAGAAGGGAGAGACGCAAATTGTGCTGCGCTCTACCACCAGTACGTTGGCCGCCAATCGCTTTCAGGCGAGTCCTTTGCAGGACAAACGCCCAACACCAAGCAGTGCTTGAGGGTACAAAATGACGCTCGAACAGGCATGCCCCATGGAATACCAAGGGGCGCAATGTGCGTTCAAAGATTCGATGATTCACTGAATTCTGCAATTCACACTACTTTTCGCATTTCGCTGCGTTCTTCATCGTTGACGAGTCTAG	JF740262	SH198996.07FU	324	Fungi	p__unidentified	c__Dothideomycetes	o__Pleosporales	f__Cucurbitariaceae	g__Pyrenochaetopsis	s__Fungi_sp	766	300670 Pyrenochaetopsis_leptospora	6.53069e-121	0.98	92.9012	0	0	0	0	0	0	0	0	0	0	0	3	0	4	0	0	4	0	0	0	0	0	0	2	3	2	4	0	0	0	0
>a441	Otu01338	Unclassified	TTAAGTTCAGCGGGTATCCCTACCTGATCCGAGGTCAAGAGTAAAAAATAGTCTTGATGGATGCCAACAATCATGACAAGAGGCGCAAAATGTGCTGCGCTCCAGGCCAATATGCCGGCTGCCAATTGTTTTAAGGCGAGTCCACGCGAAAAGCGGGACAAACACCCAACACCAAGCAGAGCTTGAGGGTACAAATGACGCTCGAACAGGCATGCCCCATGGAATACCAAGGGGCGCAATGTGCGTTCAAAGATTCGATGATTCACTGAATTCTGCAATTCACACTACTTATCGCATTTCGCTGCGTTCTTCATCGATGACGAGTCTAG	HM439521	SH204785.07FU	329	Fungi	p__Ascomycota	c__Dothideomycetes	o__Pleosporales	f__Leptosphaeriaceae	g__Leptosphaeria	s__Leptosphaeria_sp	275	303000 Leptosphaeria_sp	4.30991e-131	0.99	96.6565	8	0	28	6	4	4	0	7	4	0	4	3	0	2	7	2	7	6	0	3	9	6	2	0	2	0	5	0	0	2	0
>b8811	Otu02473	Unclassified	TTAAGTTCAGCGGGTATCCCTACCTGATCCGAGGTCAAAAGTGGAAAAGACTTACTGGACGCGAGTATTCTAGGCTAGAGGCGCAAAATGTGCTGCGCTTCAATACCAAAACACTGGCTGCCAATTACTTTAAGGCGAGTCTACGGTAGTAGACAAACACCCAACACCAAGCAGAGCTTGAGGGTACAAATGACGCTCGAACAGGCATGCCCCATGGAATACCAAGGGGCGCAATGTGCGTTCAAAGATTCGATGATTCACTGAATTCTGCAATTCACACTACTTATCGCATTTCGCTGCGTTCTTCATCGGTGACGAGTCTAG	KC867873	SH183018.07FU	324	Fungi	p__Ascomycota	c__Dothideomycetes	o__Pleosporales	f__Leptosphaeriaceae	g__Leptosphaeria	s__Leptosphaeria_sp	2	293442 Leptosphaeria_sp	5.33671e-128	0.99	96.6049	0	0	0	0	0	0	0	0	0	0	0	0	0	0	0	0	0	0	0	0	0	0	0	0	0	0	0	0	0	0	0
>d185745	Otu03150	Unclassified	TTAAGTTCAGCGGGTATCCCTACCTGATCCGAGGTCAAGAGTAAAAAATAGTCTTGATGGATGCCAACAATCATGACAAGAGGCGCAAAATGTGCTGCGCTCCAGGCCAATATGCCGGCTGCCAATTTTTTTAAGGCGAGTCCACGCGAAAAGCGGGACAAACACCCAACACCAAGCAGAGCTTGAGGGTACAAATGACGCTCGAACAGGCATGCCCCATGGAATACCAAGGGGCGCAATGTGCGTTCAAAGATTCGATGATTCACTGAATTCTGCAATTCACACTACTTATCGCATTTCGCTGCGTTCTTCAGCGGTGACGAGTCT	HM439521	SH204785.07FU	327	Fungi	p__Ascomycota	c__Dothideomycetes	o__Pleosporales	f__Leptosphaeriaceae	g__Leptosphaeria	s__Leptosphaeria_sp	2	303000 Leptosphaeria_sp	1.94601e-128	0.98	97.2477	0	0	0	0	0	0	0	0	0	0	0	0	0	0	0	0	0	0	0	0	0	0	0	0	0	0	0	0	0	0	0
>c58007	Otu02874	Unclassified	TTAAGTTCAGCGGGTATCCCTACCTGATCCGAGGTCAAAAGTGGAAAAAGACTTACTGGACGCAAGTGTTCTAGGGTGGAGACGCAAAATGTGCTGCGCTTCAATACCAAAACACTGGCTGCCAATTGCTTTGAGGCGAGTCCAAACACCAGGGAGTGGACAAACACCCAACACCAAGCAGAACTTGAGGGTACAAATGACGCTCGAACAGGCATGCCCCATGGAATACCAAGGGGCGCAATGTGCGTTCAAAGATTCGATGATTCACTGAATTCTGCAATTCACATTACTTATCGCATTTCGCTGCGTTCTTCACGGTGACGAGTCTA	KC662236	SH182992.07FU	329	Fungi	p__Ascomycota	c__Dothideomycetes	o__Pleosporales	f__Leptosphaeriaceae	g__unidentified	s__Leptosphaeriaceae_sp	5	293416 Leptosphaeriaceae_sp	5.27417e-124	0.97	95.4407	0	0	0	0	0	0	0	0	0	0	0	0	0	0	0	0	0	0	0	0	0	0	0	0	0	0	0	0	0	0	0
>d125176	Otu02152	Unclassified	TTAAGTTCAGCGGGTATCCCTACCTGATCCGAGGTCAAAAGTGATAGATGAGCTTTATGGTTGCTAATATTATTGGAGTAAATCGCAAAATGTGCTGCGCTTTATACCAAAACACTGGCTGCCAATTACTTTAAGGCGAGTCCTGGCTATAAAGGCCGGACAATCACCCAACACCAAGCATAGCTTGAGGGTACAAATGACGCTCGAACAGGCATGCCCCATGGAATACCAAGGGGCGCAATGTGCGTTCAAAGATTCGATGATTCACTGAATTCTGCAATTCACACTACTTATCGCATTTCGCTACGTTCTTCATCGATGACGAGTCTAG	DQ195780	SH200463.07FU	331	Fungi	p__Ascomycota	c__Dothideomycetes	o__Incertae_sedis	f__Incertae_sedis	g__Leptospora	s__Leptospora_rubella	8	301260 Leptospora_rubella	8.98286e-126	0.99	92.4471	0	0	0	0	0	0	0	0	0	0	0	0	0	0	0	0	0	0	0	0	0	0	0	0	0	0	0	0	0	0	0
>d184909	Otu04496	Unclassified	TTAAGTTCAGCGGGTATCCCTACCTGATCCGAGGTCAAACTTGAGGTGGAGGCTTCCTGGAGAGCCAGGCACCGTCGGACGCCGCGCGCGTTTCTGCTGCGCTCGAAGCCAACGTGCCGGCTGCCAATGCATTTGAGGCGAGTCCCGGGGGCAGGACAGACGCCCAACACCAAGCTAAAGGGGGGGCTTGAAGTTTGAAATGACGCTCGAACAGGCATGCCCTAAGGAATACCAAAGGGCGCAATGTGCGTTCAAAGATTCGATGATTCACTGAATTCTGCAATTCACACTACTTATCGCATTTCGCTGCGTTCTTCATCGTTGACGAGTCTAG	KC339223	SH198828.07FU	334	Fungi	p__Ascomycota	c__Dothideomycetes	o__Pleosporales	f__Massarinaceae	g__Massarina	s__Massarina_sp	2	300605 Massarina_sp_MUT_4323	2.05797e-132	0.99	96.7066	0	0	0	0	0	0	0	0	0	0	0	0	0	0	0	0	0	0	0	0	0	0	0	0	0	0	0	0	0	0	0
>a67014	Otu00068	Unclassified	TTAAGTTCAGCGGGTATCCCTACCTGATCCGAGGTCAAGAGCGTTAAATAAGGCTTCTTGGATGCTAGAGTACATTGATCTGAACGCAAAATGTGCTGCGCTCCGAAGCAAGTACGCCGGCTGCCAATTGTTTTAAGGCGAGTTCACACGCAAAGGCGGAACAAACACCCAACACCAAGCAGAGCTTGAGGGTACAAATGACGCTCGAACAGGCATACCTCCCGGAATACCGAGAGGTGCAATGTGCGTTCAAAGATTCGATGATTCACTGAATTCTGCAATTCACACTACTTATCGCATTTCGCTGCGTTCTTCATCGATGACGAGTCTAG	KF278454	SH202165.07FU	332	Fungi	p__Ascomycota	c__Dothideomycetes	o__Pleosporales	f__Incertae_sedis	g__Mycocentrospora	s__Mycocentrospora_acerina	2	301938 Mycocentrospora_acerina	2.65663e-133	1	96.6867	0	0	0	0	0	0	0	0	0	0	0	0	0	0	0	0	0	0	0	0	0	0	0	0	0	0	0	0	0	0	0
>c141701	Otu02181	Unclassified	TTAAGTTCAGCGGGTATCCCTACCTGATCCGAGGTCAACCATAGGAGTTGGGGTTCTGGCGCGCGGCCGCAGGGCCCTAGAGCGAGGGTGTTACTACGCTTAGGACCGTGCGGTGCCGCCACTGACTTTGGGGCCGGCCGCAGCGGGCGGGGCCCAACACCAAGCGAGGCTTGAGGGTTGAAATGACGCTCGAACAGGCATGCCCTGCGGAATACCACAGGGCGCAATGTGCGTTCAAAGATTCGATGACTCACTGAATTCTGCAATTCGCATTACTTATCGCATTTCGCTGCGTTCTTCATCGATGACGAGTCTAG	HQ914870	SH029374.07FU	317	Fungi	p__Ascomycota	c__Dothideomycetes	o__Incertae_sedis	f__Myxotrichaceae	g__Myxotrichum	s__Myxotrichum_sp	2	325537 Myxotrichum_sp_OUCMBI101149	5.80619e-109	0.93	96.53	0	0	0	0	0	0	0	0	0	0	0	0	0	0	0	0	0	0	0	0	0	0	0	0	0	0	0	0	0	0	0
>a108617	Otu03143	Unclassified	TTAAGTTCAGCGGGTATCCCTACCTGATCCGAGGTCAAGCATTGAAATGTAGGCTTACTGGACGCCGATTGTCGTGGGGGAAAGCGCAAATTGTGCTGCGCTCCAACACCAGACTGCCGGCTGCCAATGAATTCCAGGCGAGTCCGCACAAAGACGGGGACAAACACCCAACACCAAGCAAAGCTTGAAGGTACAAATGACGCTCGAACAGGCATGCCCCATGGAATACCAAGGGGCGCAATGTGCGTTCAAAGATTCGATGATTCACTGAATTCTGCAATTCACACTACTTATCGCATTTCGCTGCGTTCTTCATCGATGACGAGTCTAG	JX043179	SH462467.07FU	331	Fungi	p__Ascomycota	c__Dothideomycetes	o__Pleosporales	f__Incertae_sedis	g__Neophaeosphaeria	s__Neophaeosphaeria_sp	2	328432 Neophaeosphaeria_sp	6.30733e-113	0.93	96.3746	0	0	0	0	0	0	0	0	0	0	0	0	0	0	0	0	0	0	0	0	0	0	0	0	0	0	0	0	0	0	0
>b10137	Otu02598	Unclassified	TTAAGTTCAGCGGGTATCCCTACCTGATCCGAGGTCAACCATAAGAGTTTGGGGTTCTGGCAGGCAGCCGCCGGGCCCTAGAGCGAGAGATGTACTACGCTTAGAGCCGGACGGCGCCGCCACTGGCTTTGGGGCCGGCCGCGAGGGCGTGGCCCAACACCAAGCAGAGCTTGAGGGTTGAAATGACGCTCGAACAGGCATGCCCTGCGGAATACCACAGGGCGCAATGTGCGTTCAAAGATTCGATGACTCACTGAATTCTGCAATTCGCATTACTTATCGCATTTCGCTGCGTTCTTCACCGATGACGAGTCTAG	AF062791	SH217004.07FU	317	Fungi	p__Ascomycota	c__Dothideomycetes	o__Incertae_sedis	f__Myxotrichaceae	g__Oidiodendron	s__Oidiodendron_echinulatum	2	308059 Oidiodendron_echinulatum	8.52388e-126	0.99	96.53	0	0	0	0	0	0	0	0	0	0	0	0	0	0	0	0	0	0	0	0	0	0	0	0	0	0	0	0	0	0	0
>c121636	Otu02006	Unclassified	TTAAGTTCAGCGGGTATCCCTACCTGATCCGAGGTCAACCACAGAGTCGGGGTTCTGGCGGGCAGCCGCCCGGGACCGCAGCGAGGGGTGTACTACGCTGAGAGCCGAGCGGCGCCGCCACTGTCTTTAGGGCCGGCCGCGACGGGCCCGGCCCAACACCAAGCAGGGCTTGAGGGTTGAAATGACGCTCGAACAGGCATGCCCTGCGGAATACCACAGGGCGCAATGTGCGTTCAAAGATTCGATGACTCACTGAATTCTGCAATTCGCATTACTTATCGCATTTCGCTGCGTTCTTCATCGATGACGAGTCTAG	AF062806	SH029378.07FU	316	Fungi	p__Ascomycota	c__Dothideomycetes	o__Incertae_sedis	f__Myxotrichaceae	g__Oidiodendron	s__Oidiodendron_sp	6	325541 Oidiodendron_sp_UAMH8513	3.06185e-126	1	96.519	0	0	0	0	0	0	0	0	0	0	0	0	0	0	0	0	0	0	0	0	0	0	0	0	0	0	0	0	0	0	0
>b44316	Otu02407	Unclassified	TTAAGTTCAGCGGGTATCCCTACCTGATCCGAGGTCAACCACAGAGTTGGGGTTCTGGCAGGCCGCCGCCCGGGACCGCAGCGAGAGGTGTACTACGCTGAGAGCCGAGCGGCGCCGCCACTGTCTTTGGGGCCGGCCGCGACGGGCCCGGCCCAACACCAAGCAGAGCTTGAGGGTTGAAATGACGCTCGAACAGGCATGCCCTGCGGAATACCACAGGGCGCAATGTGCGTTCAAAGATTCGATGACTCACTGAATTCTGCAATTCGCATTACTTATCGCATTTCGCTGCGTTCTTCATCGATGACGAGTCTAG	AF062806	SH029378.07FU	316	Fungi	p__Ascomycota	c__Dothideomycetes	o__Incertae_sedis	f__Myxotrichaceae	g__Oidiodendron	s__Oidiodendron_sp	5	325541 Oidiodendron_sp_UAMH8513	6.33502e-121	0.98	96.519	0	0	0	0	0	0	0	0	0	0	0	0	0	0	0	0	0	0	0	0	0	0	0	0	0	0	0	0	0	0	0
>c159843	Otu02109	Unclassified	TTAAGTTCAGCGGGTATCCCTACCTGATCCGAGGTCAACCACGAGAGTCGGGGGGTTCTGGCAGGCCACCGCCGGGCACTGGAGCGAGGGATGTACTACGCTCAGGGCCAGGCGGCACCGCCACTGTCTTTAGGGCCGGCCGCAGCGGGCAGGGCCCAACACCAAGCGGAGCTTGAGGGTTGAAATGACGCTCGAACAGGCATGCCCTGCGGAATACCACAGGGCGCAATGTGCGTTCAAAGATTCGATGACTCACTGAATTCTGCAATTCGCATTACTTATCGCATTTCGCCACGTTCTTCATCGATGACGAGTCTAG	AF062793	SH216992.07FU	319	Fungi	p__Ascomycota	c__Dothideomycetes	o__Incertae_sedis	f__Myxotrichaceae	g__Oidiodendron	s__Oidiodendron_sp	4	308047 Oidiodendron_griseum	2.24178e-117	0.96	96.5517	0	0	0	0	0	0	0	0	0	0	0	0	0	0	0	0	0	0	0	0	0	0	0	0	0	0	0	0	0	0	0
>a90581	Otu01978	Unclassified	TTAAGTTCAGCGGGTATCCCTACCTGATCCGAGGTCAACCACATGAGTTTGGGGTTCTGGCAGGCCACCGCCGGGTCCTAGAGCGAGAGATGTACTACGCTTAGGGCCGAGCGGCGCCGCCACTGTCTTTGGGGCCGGCCGCGGGGGCAGGGCCCAACACCAAGCGGAGCTTGAGGGTTGAAATGACGCTCGAACAGGCATGCCCTGCGGAATACCACAGGGCGCAATGTGCGTTCAAAGATTCGATGACTCACTGAATTCTGCAATTCGCATTACTTATCGCATTTCGCTGCGTTCTTCATCGGTGACGAGTCTAG	AF062809	SH216989.07FU	317	Fungi	p__Ascomycota	c__Dothideomycetes	o__Incertae_sedis	f__Myxotrichaceae	g__Oidiodendron	s__Oidiodendron_truncatum	8	308044 Oidiodendron_truncatum	8.52388e-126	0.99	96.53	0	0	0	0	0	0	0	0	0	0	0	0	0	0	0	0	0	0	0	0	0	0	0	0	0	0	0	0	0	0	0
>c101599	Otu01907	Unclassified	TTAAGTTCAGCGGGTATCCCTACCTGATCCGAGGTCAAGTCATAAAATTGCTTACTGGACGCCGATCCGCCGGGGCTCCGAGAAGCGCAAATGTGCTGCGCGAGAAGCCGACGAGACCGCTGCCAATGACTTTGAGGCGAGTCCGCGCACGGAGGCGGGACAGACGCCCAACACCAAGCAGAGCTTGAGGGTGTAAATGACGCTCGAACAGGCATGCCCCACGGAATACCGAGGGGCGCAATGTGCGTTCAAAGATTCGATGATTCACTGAATTCTGCAATTCACACTACTTATCGCATTTCGCTGCGTTCTTCATCGGTGACGAGTCTAG	JX984754	SH180757.07FU	331	Fungi	p__Ascomycota	c__Dothideomycetes	o__Pleosporales	f__Incertae_sedis	g__Periconia	s__Periconia_sp	21	292500 Periconia_sp	2.56786e-129	0.98	96.6767	0	0	0	0	0	0	0	0	0	0	0	0	0	0	0	0	0	0	0	0	0	0	0	0	0	0	0	0	0	0	0
>b67764	Otu01909	Unclassified	TTAAGTTCAGCGGGTATCCCTACCTGATCCGAGGTCAAAAGTTAAAAAGGCTTGTGGACGCAAGTGTTTGTTACGAATCGCGACTTGTGCTGCGCTTCAATACCAAAACACTGGCTGCCAATTATTTTAAGGCGAGTCCAAACACTAGGGAGAGGACAAACACCCAACACCAAGCAGAGCTTGAGGGTACAAATGACGCTCGAACAGGCATGCCCCATGGAATACCAAGGGGCGCAATGTGCGTTCAAAGATTCGATGATTCACTGAATTCTGCAATTCACACTACTTATCGCATTTCGCTGCGTTCTTCATCGATGACGAGTCTAG	GU054182	SH183029.07FU	327	Fungi	p__Ascomycota	c__Dothideomycetes	o__Pleosporales	f__Phaeosphaeriaceae	g__unidentified	s__Phaeosphaeriaceae_sp	14	293453 Phaeosphaeriaceae_sp	5.23539e-124	0.97	96.6361	0	0	0	0	0	0	0	0	0	0	0	0	0	0	0	0	0	0	0	0	0	0	0	0	0	0	0	0	0	0	0
>a51717	Otu02732	Unclassified	TTAAGTTCAGCGGGTATCCCTACCTGATCCGAGGTCAAAAGTTAAAAAAGGCTTATGGACGTCAGTTTTTCGGCTAGAATCGCAAAATGTGCTGCGCTTCAATACCAAAACACTGGCTGCCAATTGCTTTAAGGCGAGTCCAAACGCAAAGGAGAGGACAAACACCCAACACCAAGCAAAGCTTGAGGGTACAAATGACGCTCGAACAGGCATGCCCCATGGAATACCAAGGGGCGCAATGTGCGTTCAAAGATTCGATGATTCACTGAATTCTGCAATTCACACTACTTATCGCATTTCGCTGCGTTCTTCATCGTTGACGAGTCTAG	KC753445	SH182993.07FU	329	Fungi	p__Ascomycota	c__Dothideomycetes	o__Pleosporales	f__Phaeosphaeriaceae	g__unidentified	s__Phaeosphaeriaceae_sp	5	293417 Phaeosphaeriaceae_sp	1.50769e-127	0.98	96.6565	0	0	0	0	0	0	0	0	0	0	0	0	0	0	0	2	0	0	0	0	0	0	0	0	0	0	0	0	0	0	0
>b59171	Otu03586	Unclassified	TTAAGTTCAGCGGGTATCCCTACCTGATCCGAGGTCAAAAGTTAAAAAAGGCTTATGGACGCAAGTATTATAGGCTAGAATCGCAAAATGTGCTGCGCTTCATTACCAAAATACTGGCTGCCAATTGTTTTAAGGCGAGTCCAAACGCGAGGGAGAGGACAAACACCCAACACCAAGCAAAGCTTGAGGGTACAAATGACGCTCGAACAGGCATGCCCCATGGAATACCAAGGGGCGCAATGTGCGTTCAAAGATTCGATGATTCACTGAATTCTGCAATTCACACTACTTATCGCATTTCGCTGCGTTCTTCATCGTTGACGAGTCTAG	KC753445	SH182993.07FU	330	Fungi	p__Ascomycota	c__Dothideomycetes	o__Pleosporales	f__Phaeosphaeriaceae	g__unidentified	s__Phaeosphaeriaceae_sp	3	293417 Phaeosphaeriaceae_sp	1.12899e-122	0.96	96.6667	0	0	0	0	0	0	0	0	0	0	0	0	0	0	0	0	0	0	0	0	0	0	0	0	0	0	0	0	0	0	0
>c137457	Otu03608	Unclassified	TTAAGTTCAGCGGGTATCCCTACCTGATCCGAGGTCAAAAGTGAAGAAGAGGCTTCATGGATGCCACGATTCAAGGACTAAGACGCAAAATGTGCTGCGCTTACTACCAAAAACACTGGCTGCCAATGACTTTAAGGCGAGTCTAATAAAAGACAAGACGCCCAACACCAAGCAAAGCTTGAGGGTACAAATGACGCTCGAACAGGCATGCCCCATGGAATACCAAGGGGCGCAATGTGCGTTCAAAGATTCGATGATTCACTGAATTCTGCAATTCACACTACTTATCGCATTTCGCTGCGTTCTTCATCGGTGACGAGTCTAG	EF619689	SH182913.07FU	325	Fungi	p__Ascomycota	c__Dothideomycetes	o__Pleosporales	f__Phaeosphaeriaceae	g__unidentified	s__Phaeosphaeriaceae_sp	2	293376 Phaeosphaeriaceae_sp	1.9316e-128	0.99	96.6154	0	0	0	0	0	0	0	0	0	0	0	0	0	0	0	0	0	0	0	0	0	0	0	0	0	0	0	0	0	0	0
>d134121	Otu03601	Unclassified	TTAAGTTCAGCGGGTATCCCTACCTGATCCGAGGTCAAAGTAAAAAAGAGGCTTAATGGAAGGAGTTATGCTGAAATTATGACGCAATGTGCTGCGCACGAAGCCAACATACTGGCTGCCAATGAATTTAAGGCGAGTCCACGCGCTGAGGCGGAACAAACACCCAACACCAAGCAGAGCTTGAAGGTTTAAATGACGCTCGAACAGGCATGCCCAACGGAATACCGAAGGGCGCAATGTGCGTTCAAAGATTCGATGATTCACTGAATTCTGCAATTCACACTACTTATCGCATTTCGCTGCGTTCTTCATCGGTGACGAGTCTAG	GQ996132	SH016229.07FU	327	Fungi	p__Ascomycota	c__Dothideomycetes	o__Pleosporales	f__Pleomassariaceae	g__unidentified	s__Pleomassariaceae_sp	3	318944 Pleomassariaceae_sp	4.02634e-123	0.97	96.6361	0	0	0	0	0	0	0	0	0	0	0	0	0	0	0	0	0	0	0	0	0	0	0	0	0	0	0	0	0	0	0
>c65019	Otu02221	Unclassified	TTAAGTTCAGCGGGTATCCCTACCTGATCCGAGGTCAAAGTGATAGGTAGCTTGATGGAAGGAGGCAGGCTGGAGCCGCGACGCAATGTGCTGCGCACGAAGCCAACTTACCGGCTGCCAATGAATTTAAGGCGAGTCCACGCACAGAGGCGGAACAAACACCCAACACCAAGCAGAGCTTGAAGGTTTAAATGACGCTCGAACAGGCATGCCCAACGGAATACCGAAGGGCGCAATGTGCGTTCAAAGATTCGATGATTCACTGAATTCTGCAATTCACACTACTTATCGCATTTCGCTGCGTTCTTCATCGATGACGAGTCTAG	AB554113	SH016211.07FU	326	Fungi	p__Ascomycota	c__Dothideomycetes	o__Pleosporales	f__Pleomassariaceae	g__unidentified	s__Pleomassariaceae_sp	2	318926 Pleomassariaceae_sp	1.40327e-119	0.96	96.6258	0	0	0	0	0	0	0	0	0	0	0	0	0	0	0	0	0	0	0	0	0	0	0	0	0	0	0	0	0	0	0
>d79900	Otu02149	Unclassified	TTAAGTTCAGCGGGTATCCCTACCTGATCCGAGGTCAAAAGTTAAAAAAATGTGGTCTTGATGGATGCTCAACCAGGGCTGATTCAAAGTGCAAGAATTGTGCTGCGCTCCGAAACCAGTAGGTCGGCTGCCAATCATTTTAAGGCGAGTCTCGCGAGAGACAAAAAGACGCCCAACACCAAGCAAAGCTTGAGGGTACAAATGACGCTCGAACAGGCATGCCCTTTGGAATACCAAAGGGCGCAATGTGCGTTCAAAGATTCGATGATTCACTGAATTCTGCAATTCACACTACGTATCGCATTTCGCTGCGTTCTTCATCGTTGACGAGTCTAG	EF452449	SH199527.07FU	336	Fungi	p__Ascomycota	c__Dothideomycetes	o__Pleosporales	f__Pleosporaceae	g__Pleospora	s__Pleospora_sp	9	300901 Pleospora_herbarum	1.18934e-126	0.97	96.7262	0	0	0	0	0	2	0	0	0	0	0	0	0	0	0	0	0	0	0	0	0	0	0	0	0	0	0	0	0	0	0
>a58340	Otu01416	Unclassified	TTAAGTTCAGCGGGTATCCCTACCTGATCCGAGGTCAAAGGTTGAAAAAAAGGCTTGCTGGACGCTGACCTTGGCTGGCAAAGAGCGCGACTTGTGCTGCGCTCCGAAACCAGTAGGCCGGCTGCCAATGACTTTAAGGCGAGTCTCCAGCGAACTGGAGACAAAAGACGCCCAACACCAAGCAAAGCTTGAGGGTACAAATGACGCTCGAACAGGCATGCCCTTTGGAATACCAAAGGGCGCAATGTGCGTTCAAAGATTCGATGATTCACTGAATTCTGCAATTCACACTACGTATCGCATTTCGCTGCGTTCTTCATCGATGACGAGTCTAG	KC492565	SH199531.07FU	335	Fungi	p__Ascomycota	c__Dothideomycetes	o__Pleosporales	f__Pleosporaceae	g__unidentified	s__Pleosporaceae_sp	140	300905 Pleosporaceae_sp	1.25922e-134	1	96.7164	0	0	0	0	0	0	0	0	0	0	0	0	0	0	0	0	0	0	2	0	0	0	0	0	0	0	0	0	0	0	0
>a12815	Otu01483	Unclassified	TTAAGTTCAGCGGGTATCCCTACCTGATCCGAGGTCAAAAGTTGAAAAAAGGCTTTGTGGATGCTGACCTTGGCTGGAAGAGAGCGCGACTTGTGCTGCGCTCCGAAACCAGTAGGCCGGCTGCCAATTACTTTAAGGCGAGTCTCCAGCGAACTGGAGACAAGACGCCCAACACCAAGCAAAGCTTGAGGGTACAAATGACGCTCGAACAGGCATGCCCTTTGGAATACCAAAGGGCGCAATGTGCGTTCAAAGATTCGATGATTCACTGAATTCTGCAATTCACACTACTTATCGCATTTCGCTGCGTTCTTCATCGATGACGAGTCTAG	AY943384	SH216785.07FU	332	Fungi	p__Ascomycota	c__Dothideomycetes	o__Pleosporales	f__Pleosporaceae	g__unidentified	s__Pleosporaceae_sp	91	307953 Pleosporaceae_sp	2.65663e-133	1	96.6867	0	0	0	0	0	0	0	0	0	0	0	0	0	0	0	0	0	0	0	0	0	0	0	0	0	0	0	0	0	0	0
>c60588	Otu02459	Unclassified	TTAAGTTCAGGGGGTATCCCTACCTGATCCGAGGTCAAAAGTTAAAAATGTAGAGTCTTGATGGATTACCGTCCTTTTCTCCTGATACAAAGCGCAAAATATGTGCTGCGCTCAAAACCAGTAGGCCGGCTGCCAATCGTTTTAAGGCGAGTCTCCCAGAAAGAGGGAGACAAAAAACGCCCAACACCAAGCAAAGCTTGAAGGTACAAATGACGCTCGAACAGGCATGCCCTTTGGAATACCAAAGGGCGCAATGTGCGTTCAAAGATTCGATGATTCACTGAATTCTGCAATTCACACTACGTATCGCATTTCGCTGCGTTCTTCATCGGTGACGAGTCTAG	DQ300199	SH215376.07FU	344	Fungi	p__Ascomycota	c__Dothideomycetes	o__Pleosporales	f__Pleosporaceae	g__unidentified	s__Pleosporaceae_sp	3	307387 Pleosporaceae_sp	1.26114e-130	0.97	96.8023	0	0	0	0	0	0	0	0	0	0	0	0	0	0	0	0	0	0	0	0	0	0	0	0	0	0	0	0	0	0	0
>c8323	Otu01334	Unclassified	TTAAGTTCAGCGGGTATCCCTACCTGATCCGAGGTCAAAGTAAAAAAAGGCTTGTGGAAGGGGGTCTGTTGAAATCGCTTGCAATGTGCTGCGCACGAAGCCAACATACCGGCTGCCAATGAATTTAAGGCGAGTCCACACGCTGAGGCGGAACAAACACCCAACACCAAGCAGAGCTTGAAGGTTTAAATGACGCTCGAACAGGCATGCCCAACGGAATACCGAAGGGCGCAATGTGCGTTCAAAGATTCGATGATTCACTGAATTCTGCAATTCACACTACTTATCGCATTTCGCTGCGTTCTTCATCGTTGACGAGTCTAG	KF297015	SH198677.07FU	324	Fungi	p__Ascomycota	c__Dothideomycetes	o__Pleosporales	f__unidentified	g__unidentified	s__Pleosporales_sp	398	300563 Pleosporales_sp	6.53069e-121	0.96	96.6049	0	2	0	0	0	0	0	0	0	0	0	0	0	0	0	0	0	0	0	0	0	0	0	0	0	0	0	0	0	0	0
>b12059	Otu01412	Unclassified	TTAAGTTCAGCGGGTATCCCTACCTGATCCGAGGTCAAGAGCAAAAAAAATGTACTTGATGGATGCCGACATCCATGGCAAGAAGCGCAAAATGTGCTGCGCTCTATAACCAGATTGCCGGCTGCCAATTGCTTTAAGGCGAGTCCACGCGCAAAGCGGGACAAACACCCAACACCAAGCAGAGCTTGAGGGTACAAATGACGCTCGAACAGGCATGCCCCATGGAATACCAAGGGGCGCAATGTGCGTTCAAAGATTCGATGATTCACTGAATTCTGCAATTCACACTACTTATCGCATTTCGCTGCGTTCTTCATCGTTGACGAGTCTAG	AY649590	SH204782.07FU	332	Fungi	p__Ascomycota	c__Dothideomycetes	o__Pleosporales	f__unidentified	g__unidentified	s__Pleosporales_sp	171	302997 Pleosporales_sp	1.13726e-122	0.96	96.6867	2	0	0	0	0	0	0	0	0	0	0	0	2	0	0	0	0	0	0	0	0	0	0	0	0	0	0	0	0	0	0
>c79012	Otu01628	Unclassified	TTAAGTTCAGCGGGTATCCCTACCTGATCCGAGGTCAAAGTAAAAAAAGGCTTGTGGAAGGGGGTCTGTTGAAATCGCTTGCAATGTGCTGCGCACGAAGCCAACATACCGGCTGCCAATGAATTTAAGGCGAGTCCACACGCTGAGGCGGAACAAACACCCAACACCAAGCAGAGCTTGAACGTTTAAATGACGCTCGAACAGGCATGCCCAACGGAATACCGAAGGGCGCAATGTGCGTTCAAAGATTCGATGATTCACTGAATTCTGCAATTCACACTACTTATCGCATTTCGCTGCGTTCTTCATCGATGACGAGTCTAG	KF297015	SH198677.07FU	324	Fungi	p__Ascomycota	c__Dothideomycetes	o__Pleosporales	f__unidentified	g__unidentified	s__Pleosporales_sp	66	300563 Pleosporales_sp	6.53069e-121	0.96	96.6049	0	0	0	0	0	0	0	0	0	0	0	0	0	0	0	0	0	0	0	0	0	0	0	0	0	0	0	0	0	0	0
>a241	Otu01661	Unclassified	TTAAGTTCAGCGGGTATCCCTACCTGATCCGAGGTCAAACTGGGGGGTGGAGCTTGATGGACGCGGGCCCGCCGGTGCCTCGAGAAGCGCAATGTGCTGCGCGAGAAGCTGGCACGACCGCTGCCAATACCTTTAGGGCGAGTCCGCGCGCGAAGCGGGACAGACGCCCAACACCAAGCGGAGCTTGAGAGGGTAAATGACGCTCGAACAGGCATGCCCCACGGAATACCATGGGGCGCAATGTGCGTTCAAAGATTCGATGATTCACTGAATTCTGCAATTCACACTACTTATCGCATTTCGCTGCGTTCTTCATCGTTGACGAGTCTAG	JN859349	SH207010.07FU	331	Fungi	p__Ascomycota	c__Dothideomycetes	o__Pleosporales	f__unidentified	g__unidentified	s__Pleosporales_sp	44	303913 Pleosporales_sp	2.56786e-129	0.98	96.6767	0	0	0	0	0	0	0	0	0	0	0	0	2	0	0	0	0	0	0	0	0	0	0	0	0	0	0	2	0	0	0
>a98301	Otu01689	Unclassified	TTAAGTTCAGCGGGTATCCCTACCTGATCCGAGGTCAAAAAAATAAAGATGGGCTTTCGTGGACGCAGGCCTCCGATGCCTCGAGAAGCGCAAATGTGCTGCGCGAGAGGCGGTCAGGACCGCTGCCAATGCCTTTGGGGCGAGTCCGCGCGCGGAGGCGGGACAGACGCCCATCACCAAGCAGTGCTTGAGGGTGTAGATGACGCTCGAACAGGCATGCCCCATGGAATACCAAGGGGCGCAATGTGCGTTCAAAGATTCGATGATTCACTGAATTCTGCAATTCACACTACTTATCGCATTTCGCTGCGTTCTTCATCGATGACGAGTCTAG	EF635649	SH186988.07FU	334	Fungi	p__Ascomycota	c__Dothideomycetes	o__Pleosporales	f__unidentified	g__unidentified	s__Pleosporales_sp	42	295210 Pleosporales_sp	1.07809e-114	0.93	99.7006	0	0	0	0	0	0	0	0	0	7	0	0	0	0	0	0	0	0	0	0	0	0	0	0	0	0	0	2	0	0	0
>a114323	Otu01667	Unclassified	TTAAGTTCAGCGGGTATCCCTACCTGATCCGAGGTCAAAAGTGAAAAAGGCTTGTGGAAGCGGGCGTATAGCCTTGAATCGCGACTTGTGCTGCGCTTCAAAACCAAAACACTGGCTGCCAATGACTTTAAGGCGAGTCCCTCGGGACAAACACCCAACACCAAGCAAAGCTTGAAGGTACAAATGACGCTCGAACAGGCATGCCCCATGGAATACCAAGGGGCGCAATGTGCGTTCAAAGATTCGATGATTCACTGAATTCTGCAATTCACACTACTTATCGCATTTCGCTGCGTTCTTCATCGATGACGAGTCTAG	KF752609	SH208739.07FU	318	Fungi	p__Ascomycota	c__Dothideomycetes	o__Pleosporales	f__Incertae_sedis	g__unidentified	s__Pleosporales_sp	31	304630 Pleosporales_sp	1.82493e-124	0.99	96.5409	0	0	0	0	0	0	0	0	0	0	0	0	0	2	0	0	0	0	2	0	0	0	0	0	0	0	0	0	0	0	0
>b79530	Otu01673	Unclassified	TTAAGTTCAGCGGGTATCCCTACCTGATCCGAGGTCAAGAGTGTAAAAATGTACTTTTGGACGTCGTCGTTCTGAATGCAAAGCGCGAGATGTACTGCGCTCCGAAATCAATACGCCGGCTGCCAATTGTTTTGAGGCGAGTCTACGCGCAGAGGCGAGACAAACACCCAACACCAAGCAGAGCTTGAAGGTACAAATGACGCTCGAACAGGCATGCCCCATGGAATACCAAGGGGCGCAATGTGCGTTCAAAGATTCGATGATTCACTGAATTCTGCAATTCACACTACTTATCGCATTTCGCTACGTTCTTCATCGATGACGAGTCTAG	GU909516	SH174567.07FU	331	Fungi	p__Ascomycota	c__Dothideomycetes	o__Pleosporales	f__unidentified	g__unidentified	s__Pleosporales_sp	31	289735 Pleosporales_sp	3.33896e-130	0.99	96.6767	0	0	0	0	0	0	0	0	0	0	0	0	0	0	0	0	0	2	0	0	0	0	0	0	4	0	0	0	0	0	0
>a69569	Otu01698	Unclassified	TTAAGTTCAGCGGGTATCCCTACCTGATCCGAGGTCAAGAGTGTAAAATAGTCTTGATGGATGCTACCGTATAAGACACAGAGCGCGATTTGTGCTGCGCTCCGAAACTAATACGCCGGCTGCCAATTGCTTTAAGGCGAGTCCGCGCACAAAGGCGGGACAAACACCCAACACCAAGCAGAGCTTGAAGGTACAAATGACGCTCGAACAGGCATGCCCCATGGAATACCAAGGGGCGCAATGTGCGTTCAAAGATTCGATGATTCACTGAATTCTGCAATTCACACTACTTATCGCATTTCGCTGCGTTCTTCATCGTTGACGAGTCTAG	KC753407	SH215818.07FU	331	Fungi	p__Ascomycota	c__Dothideomycetes	o__Pleosporales	f__unidentified	g__unidentified	s__Pleosporales_sp	23	307548 Pleosporales_sp	5.64533e-132	0.99	96.6767	0	0	0	0	0	0	0	0	0	0	0	0	3	3	0	0	0	0	0	0	0	0	0	0	0	0	2	0	0	0	0
>b81563	Otu01844	Unclassified	TTAAGTTCAGCGGGTATCCCTACCTGATCCGAGGTCAAACGTGGTAAAAAGGGCTTCGTGGACGCGAACCCGCCGCCTCGAGAAGCGCAAATGTGCTGCGCGAGAGGGCGATCGGGACCGCTGCCAATGCCTTTGGGGCGAGTCCGCGCGCGAAGGCGGGACAGACGCCCATCACCAAGCAGTGCTTGAGGGTGTAGATGACGCTCGAACAGGCATGCCCCATGGAATACCAAGGGGCGCAATGTGCGTTCAAAGATTCGATGATTCACTGAATTCTGCAATTCACACTACTTATCGCATTTCGCTGCGTTCTTCATCGGTGACGAGTCTAG	EF635649	SH186988.07FU	332	Fungi	p__Ascomycota	c__Dothideomycetes	o__Pleosporales	f__unidentified	g__unidentified	s__Pleosporales_sp	17	295210 Pleosporales_sp	7.36734e-133	0.98	99.6988	0	0	0	0	0	0	0	0	0	0	0	0	0	0	0	0	0	0	0	0	0	0	0	0	0	0	0	0	0	0	0
>b135064	Otu02735	Unclassified	TTAAGTTCAGCGGGTATCCCTACCTGATCCGAGGTCAAAAGTGTTGATAATCTTTGTGGATGCTAGTAATAAGAGCCTGAATTGCAATTGTGCTGCGCTTCAAACCAGTATACCGGCTGCCAATGTATTTAAGGCGAGTCTAAGCGAGGCGAAGACAAACACCCAACACCAAGCAAGGCTTGAGAGTACAAATGACGCTCGAACAGGCATGCCCCATGGAATACCAAGGGGCGCAATGTGCGTTCAAAGATTCGATGATTCACTGAATTCTGCAATTCACACTACTTATCGCATTTCGCTGCGTTCTTCATCGTTGACGAGTCT	HF947083	SH208535.07FU	324	Fungi	p__Ascomycota	c__Dothideomycetes	o__Pleosporales	f__unidentified	g__unidentified	s__Pleosporales_sp	5	304571 Pleosporales_sp	1.35121e-115	0.94	97.2222	0	0	0	0	0	0	0	0	0	0	0	0	0	0	0	0	0	0	0	0	0	0	0	0	0	0	0	0	0	0	0
>a92122	Otu02323	Unclassified	TTAAGTTCAGCGGGTATCCCTACCTGATCCGAGGTCAAGCGTAAAGGTGTAGGCTTGTGGACGCCGCCGTCCGCAGCGGAGAGCGCAAAATGTGCTGCGCTCCCACTCGGGACGGCTGGCTGCCAATGTATTTGAGGCGAGTTCACGCGCGCAGCGGAACAAACGCCCAACACCCAGCAGGGCTGGAGGGTACAAATGACGCTCGAACAGGCATGCCCCATGGAATACCAAGGGGCGCAATGTGCGTTCAAAGATTCGATGATTCACTGAATTCTGCAATTCACACTACTTATCGCATTTCGCTGCGTTCTTCATCGGTGACGAGTCTAG	GQ996178	SH023374.07FU	330	Fungi	p__Ascomycota	c__Dothideomycetes	o__Pleosporales	f__unidentified	g__unidentified	s__Pleosporales_sp	4	322600 Pleosporales_sp	3.22735e-126	0.97	96.6667	0	0	0	0	0	0	0	0	0	0	0	0	0	0	0	0	0	0	0	0	0	0	0	0	0	0	0	0	0	0	0
>d1841	Otu02470	Unclassified	TTAAGTTCAGCGGGTATCCCTACCTGATCCGAGGTCAAAGACGGTAAATGTGCTTGTTGGACGCGAACCGGAGCCCCTCAAGAAGCGCAATGTGCTGCGCGAGAGGAGGCAAGGACCGCTGCCAATGAATTTGGGGCGAGTCCACGCGCGGAGGCGGGACAGACGCCCAACACCAAGCAGAGCTTGAGGGTGTAGATGACGCTCGAACAGGCATGCCCCACGGAATACCGAGGGGCGCAATGTGCGTTCAAAGATTCGATGATTCACTGAATTCTGCAATTCACACTACTTATCGCATTTCGCTGCGTTCTTCATCGGTGACGAGTCTAG	AB734792	SH186936.07FU	330	Fungi	p__Ascomycota	c__Dothideomycetes	o__Pleosporales	f__unidentified	g__unidentified	s__Pleosporales_sp	4	295158 Pleosporales_sp	6.67745e-121	0.94	99.697	0	0	0	0	0	0	0	0	0	0	0	0	0	0	0	0	0	0	0	0	0	0	0	0	0	0	0	0	0	0	0
>d136913	Otu03144	Unclassified	TTAAGCTCAGCGGGTATCCCTACCTGATTCGAGGTCAAACTGGGGGGGTTCTTGCTGGATGCGAGCCCGCCGGGAACCTTCTGAAGCGCAATGTGCTGCGCGAGAAGCCGGCGATGCCGCTGCCAATGGATTTGGGGCGAGTCCCCGCGGGAAGCGGGGACAGACGCCCAACACCAAGCGTAGCTTGAGGGTGTAAATGACGCTCGAACAGGCATGCCCAATGGAATACCAAGGGGCGCAATGTGCGTTCAAAGATTCGATGATTCACTAAAGTCTGCAATTCACACTACTTATCGCATTTCGCTGCGTTCTTCATCGTTGACGAGTCTAG	JQ437611	SH199605.07FU	331	Fungi	p__Ascomycota	c__Dothideomycetes	o__Pleosporales	f__unidentified	g__unidentified	s__Pleosporales_sp	2	300929 Pleosporales_sp	8.98286e-126	0.97	96.6767	0	0	0	0	0	0	0	0	0	0	0	0	0	0	0	0	0	0	0	0	0	0	0	0	0	0	0	0	0	0	0
>a48567	Otu01555	Unclassified	TTAAGTTCAGCGGGTATCCCTACCTGATCCGAGGTCAAAAGGTTGAAAGAAGCTTCATGGACGCGCGACCGCGGCTGGACAAGAGCGCAAATAATGTGCTGCGCTCCGAAACCAGTAGGCCGGCTGCCAATGATTTTAAGGCGAGTCTCGGGAGAGAGACAAGACGCCCAACACCAAGCAAAGCTTGAGGGTACAAATGACGCTCGAACAGGCATGCCCTTTGGAATACCAAAGGGCGCAATGTGCGTTCAAAGATTCGATGATTCACTGAATTCTGCAATTCACACTACTTATCGCATTTCGCTGCGTTCTTCATCGATGACGAGTCTAG	EF452461	SH193140.07FU	331	Fungi	p__Ascomycota	c__Dothideomycetes	o__Pleosporales	f__Pleosporaceae	g__Pyrenophora	s__Pyrenophora_sp	88	298028 Pyrenophora_graminea	6.90837e-125	0.97	96.6767	0	0	0	0	0	0	0	0	0	0	0	0	0	0	0	0	0	0	0	0	0	0	0	0	0	0	0	0	0	0	0
>b116002	Otu03588	Unclassified	TTAAGTTCAGCGGGTATCCCTACCTGATCCGAGGTCAAACCATAGAAAAAATTGGATTGTTCGTCCGGCGGGCGGCACCGCGCGCTCCGTAGCGGGTAACTTGACTACGCTGGGAGACGGGCACCGCTGCCTACGGGTTTCTGGCACGTCCTAGCGGACGACGCCCAATACCAAGCGTGAGCTTGAGGTTTGAAATGACGCTCGAACAGGCATGCCCCTCGGAATACCAAGGGGCGCAATGTGCGTTCAAAGATTCGATGATTCACTGAATTCTGCAATTCACATTACTTATCGCATTTCGCTGCGTTCTTCATCGGTGCCGAGTCTAG	HQ436097	SH018860.07FU	329	Fungi	p__Ascomycota	c__Dothideomycetes	o__Pleosporales	f__Tubeufiaceae	g__unidentified	s__Tubeufiaceae_sp	2	320285 Tubeufiaceae_sp	6.85794e-125	0.97	97.2644	0	0	0	0	0	0	0	0	0	0	0	0	0	0	0	0	0	0	0	0	0	0	0	0	0	0	0	0	0	0	0
>c38173	Otu04440	Saprotroph	TTAAGTTCAGCGGGTATCCTTACCTGATCCGAGGTCAACCTGGTTTAAAAAGTTTGGTTGAGGCTAGCCGCCGGCCGGACCTACACGAGTGGGTGACAGAGCCCCATACACTCGAGGACCGGACACGGTGCCGCCGCTGCCTTTCGGGCCCGTCCCGGCTGGAGAACCGGGACGGGGGCCCAACACACAAGCCGTGCTTGAGGGCAGCAATGACGCTCGGACAGGCATGCCCCCCGGAATACCAGAGGGCGCAATGTGCGTTCAAAGACTCGATGATTCACTGAATTCTGCAATTCACATTACGTATCGCATTTCGCCACGTTCTTCATCGATGACGAGTCTAG	KF411579	SH182520.07FU	344	Fungi	p__Ascomycota	c__Eurotiomycetes	o__Eurotiales	f__Trichocomaceae	g__Aspergillus	s__Aspergillus_sp	2	293209 Aspergillus_sp_DY115_21_8_M4	3.39286e-126	0.95	97.6744	0	0	0	0	0	0	0	0	0	0	0	0	0	0	0	0	0	0	0	0	0	0	0	0	0	0	0	0	0	0	0
>a84075	Otu04449	Saprotroph	TTAAGTTCAGCGGGTATCCCTACCTGATCCGAGGTCAACCTGGTTAAAAAGATTGGTTGCGAGGCTAGCTGCAAGCTGGACCTACGGGAGCGGGTGACAAAGCCCCATACGCTCGAGGACCAGACATGGTGCCGCCACTGCCTTTTGGGCCCGTCCCCGTTACCAGGGACGGAAGCCCAACACACAAGCCGTGCTTGAGGGCAGCAATGACGCTCAGACAGGCATGCCCTTCGGAATACCAAAGGGCGCAATGTGCGTTCAAAGATTCGATGATTCACTGAAATCTGCAATTCACACTACTTATCGCATTTCGCCACGTTCTTCATCGATGACGAGTCTAG	JQ918177	SH179237.07FU	341	Fungi	p__Ascomycota	c__Eurotiomycetes	o__Eurotiales	f__Trichocomaceae	g__Aspergillus	s__Aspergillus_sp	2	291824 Aspergillus_cibarius	4.36557e-127	0.96	97.654	0	0	0	0	0	0	0	0	0	0	0	0	0	0	0	0	0	0	0	0	0	0	0	0	0	0	0	0	0	0	0
>c118624	Otu02317	Saprotroph	TTAAGTTCAGCGGGTATCCCTACCTGATCCGAGGTCAACCGGTAAAAAAATAATAGTTCGACCAGCGCCGGCCGGGCCACATTGAGCGGAGAGAGTTCCCATACGCTCGGGCACCGGATCGGGCGCCGCCACTGCCTTTCGGGCCTGTTTTTGTTTTAGAAAAACAAAGTCCAACACACAAGCCGTGCTTGAAGGTTGTAATGACGCTCGGACAGGCATGCCCTCCGGAATACCAGAGGGCGCAATGTGCGTTCAAAGATTCGATGATTCACGGAATTCTGCAATTCACATTACTTATCGCATTTCGCTGCGTTCTTCATCGTTGACGAGTCTAG	AF038352	SH026061.07FU	335	Fungi	p__Ascomycota	c__Eurotiomycetes	o__Onygenales	f__Onygenaceae	g__Auxarthron	s__Auxarthron_sp	2	323939 Auxarthron_californiense	8.84163e-122	0.95	97.6119	0	0	0	0	0	0	0	0	0	0	0	0	0	0	0	0	0	0	0	0	0	0	0	0	0	0	0	0	0	0	0
>b3190	Otu01724	Saprotroph	TTAAGTTCAGCGGGTATCCCTACCTGATCCGAGGTCAACCTGATAAAATTGGGGGGTTGTTGGCAGGCACATGCCCAGGCCTCCAGAGCGAGAAAAATTACTACGCTCGGAGCTGGACAGCACCGCCACTGACTTTAGGGCCCGCCAGGCGGCGGAGCCCAACACCAAGCTAGGCTTGAGGGTTGTAATGACGCTCGGACAGGCATGCCCCCCGGAATACCAGGGGGCGCAATGTGCGTTCAAAGATTCGATGATTCACTGAATTCTGCAATTCACATTACTTATCGCATTTCGCTGCGTTCTTCATCGTTGACGAGTCTAG	AB520501	SH183332.07FU	322	Fungi	p__Ascomycota	c__Eurotiomycetes	o__Onygenales	f__Onygenaceae	g__Chrysosporium	s__Chrysosporium_sp	13	293547 Chrysosporium_sp	1.42499e-123	0.98	96.5839	0	0	0	0	0	0	0	0	0	0	0	0	0	0	0	0	0	0	0	0	0	0	0	0	0	0	0	0	0	0	0
>a95205	Otu01534	Saprotroph	TTAAGTTCAGCGCGTATTCCTACCTGATCCGAGGTCAACCTTAGAAGTTTCCTAGTTAAAGGAGAGGACCGGGTCCCGGGTGCCCTTGTCCGATACGTGCTCAGTTAAAAGCTCAGTGTACCGGGGGAACCACAGGTCGCCGTCATTGTCTTTAGGAGGGGTCGATCGCTCGACCGGCCGTCCAACACCAAGCACGGGGCTTGAGGGGTGATAATGACGCTCGAACAGGCATGCCCTTCGGAATACCAAAGGGCGCAATGTGCGTTCAAAGATTCGATGACTCACTGGAATTCTGCAATTCGCATTACTTATCGCATTTCGCTGCGTTCTTCATCGATGACGAGTCTAG	EU035405	SH213263.07FU	349	Fungi	p__Ascomycota	c__Eurotiomycetes	o__Chaetothyriales	f__Herpotrichiellaceae	g__Cladophialophora	s__Cladophialophora_chaetospira	64	306477 Cladophialophora_chaetospira	8.31217e-141	1	96.8481	0	0	3	0	0	0	0	0	0	0	0	0	0	0	5	0	0	0	0	0	0	0	0	0	0	0	0	0	0	0	0
>a71427	Otu01491	Saprotroph	TTAAGTTCAGCGGGTATCCCTGCCTGATCCGAGGTCAACCGGAAAGACGCGAACGTCGGGGGGTCGGCAGACACCGGCCGGGCCTCCAGAGCGGGTGACAAAGCCCCATACGCTCGAGGACCGGGCACGGCGCCGCCACTGCCTTTCGGGCCCGTCTCCCAGGGGAGACGAGACCCAACACACAAGCCGCGCTTGAGGGCAGTAATGACGCTCGGACAGGCATGCCCCCCGGAATACCAGGGGGCGCAATGTGCGTTCAAAGATTCGATGATTCACTGAATTCTGCAATTCACATTACTTATCGCATTTCGCTGCGTTCTTCATCGTTGACGAGTCTAG	KF800140	SH029682.07FU	339	Fungi	p__Ascomycota	c__Eurotiomycetes	o__Eurotiales	f__unidentified	g__unidentified	s__Eurotiales_sp	97	325698 uncultured_fungus	1.38447e-111	0.91	97.6401	0	0	0	0	0	0	0	0	0	0	0	0	0	0	0	0	0	0	0	0	0	0	0	0	0	0	0	0	0	0	0
>b106361	Otu02003	Saprotroph	TTAAGTTCAGCGGGTATCCCTGCCTGATCCGAGGTCAACCGGTGGTAAGGTTGGGTTGGGTCGGCGGTCGCCGGCCGGGCCTCCAGAGCGGGTGACAAAGCCCTATACGCTCGAGGTCCGGGCACGACGCCGCCACTGCCTTTCGGGCACGCCCCCCCGGGGAGAGGGGGCGAGGGCCCAACACACAAGCCGCGCTTGAGGGCAGTAATGACGCTCGGACAGGCATGCCCCCCGGAATACCGGGGGGCGCAATGTGCGTTCAAAGATTCGATGATTCACTGAATTCTGCAATTCACATTACTTATCGCATTTCGCTGCGTTCTTCATCGGTGACGAGTCTAG	HQ832954	SH017008.07FU	342	Fungi	p__Ascomycota	c__Eurotiomycetes	o__Eurotiales	f__unidentified	g__unidentified	s__Eurotiales_sp	15	319341 Eurotiales_sp	6.97097e-121	0.94	97.6608	0	0	0	0	0	0	0	0	0	0	0	0	0	0	0	0	0	0	0	0	0	0	0	0	0	0	0	0	0	0	0
>d154212	Otu02582	Saprotroph	TTAAGTTCAGCGGGTATCCCTACCTGATCCGAGGTCAACCTTGAGAAAAGATTGGGGGTAGGCAGGCCCCGGCCGGACCTCACAGAGCGAGTGACAAAGCCCCATACGCTCGAGGACCGGACGCGACGCCGCCACTGCCTTTCAGGCCTGTCCCCGGGGGGACAGCGCCCAACACACAAGCCGCGCTTGAGGGTAGCAATGACGCTCGGACAGGCATGCCCCCCGGAATGCCAGGGGGCGCAATGTGCGTTCAAAGATTCGATGATTCACGGAATTCTGCAATTCACATTACTTATCGCATTTCGCTGCGTTCTTCATCGATGACGAGTCTAG	GU366670	SH208851.07FU	333	Fungi	p__Ascomycota	c__Eurotiomycetes	o__Eurotiales	f__unidentified	g__unidentified	s__Eurotiales_sp	2	304680 Eurotiales_sp	1.2128e-130	0.98	97.5976	0	0	0	0	0	0	0	0	0	0	0	0	0	0	0	0	0	0	0	0	0	0	0	0	0	0	0	0	0	0	0
>b133858	Otu04456	Saprotroph	TTAAGTTCAGCGTGTATCCCTGCCTGATCCGAGGTCAACCGGTTAAAGGTCTGGACGGGTCGGCGGCGGACGGCCGGGCCTCCAGAGCGGGTGACGAAGCCCCATACGCTCGAGGACCGGGCACGGCGCCGCCACTGCCTTTCGGGCACGCCCCCCCGGGGGGGGGGGCGAGGGCCCAACACACAAGCCGCGCTTGAGGGCAGTAATGACGCTCGGACAGGCATGCCCCCCGGAATACCAGGGGGCGCAATGTGCGTTCAAAGATTCGATGATTCACTGAATTCTGCAATTCACATTACTTATCGCATTTCGCTACGTTCTTCATCGATGACGAGTCTAG	HQ832954	SH017008.07FU	340	Fungi	p__Ascomycota	c__Eurotiomycetes	o__Eurotiales	f__unidentified	g__unidentified	s__Eurotiales_sp	2	319341 Eurotiales_sp	1.17034e-122	0.95	97.6471	0	0	0	0	0	0	0	0	0	0	0	0	0	0	0	0	0	0	0	0	0	0	0	0	0	0	0	0	0	0	0
>c32667	Otu02575	Saprotroph	TTAAGTTCAGCGGGTATCCCTACCTGATCCGAGGTCAACTTTAGAAAAAAGATTGATTCGGACTGGCGCCGGTCCGGGCCGTAAAGTGAGTGACAAAGCCCCATACACTTTGGCTGATCGGATAACCGCGACGCCGCCATTGCCTTCGGGGCGCGTCCCGTAGGGGACGGCACCCATCACACAAGCCGGGCTTGAGGGTTGCAAATGACGCTCGGACAGGCATGCCCCCCGGAATACCAGAGGGCGCAATGTGCGTTCAAAGATTCGATGATTCACGGAATTCTGCAATTCACATTACTTATCGCATTTCGCTGCGTTCTTCATCGATGACGAGTCTAG	JX270352	SH200656.07FU	339	Fungi	p__Ascomycota	c__Eurotiomycetes	o__Onygenales	f__Gymnoascaceae	g__Gymnoascus	s__Gymnoascus_sp	2	301354 Gymnoascus_sp_02NH07	2.15965e-136	1	96.7552	0	0	0	0	0	0	0	0	0	0	0	0	0	0	0	0	0	0	0	0	0	0	0	0	0	0	0	0	0	0	0
>d64287	Otu02863	Saprotroph	TTAAGTTCAGCGGGTACTCCTACCTGATCCGAGGTCAAACCGGATAAAATCAAAAGTTTTTGATGATCGGCGCCGATCGGGTCTTTGAGCGATGTTATAAATCCCATACACTCAGACACCAAGAACTCGGTGCCGCCACTGCATTTCAGGCTCGTCCACCCGGAGCGGGGGACGCTAGCCCATCTCACAAGCCGCGCTTGAGGGTTTGCAATGACGCTCGAACAGGCATGCCCCCCGGAATACCAGAGGGCGCAATGTGCGTTCAAAGATTCGATGATTCACGGAATTCTGCAATTCACATTACTTATCGCATTTCGCTGCGTTCTTCATCGTTGACGAGTCTAG	KC469983	SH192688.07FU	345	Fungi	p__Ascomycota	c__Eurotiomycetes	o__Onygenales	f__Onygenaceae	g__unidentified	s__Onygenaceae_sp	4	297823 Coccidioides_posadasii	1.78357e-108	0.91	97.6812	0	0	0	0	0	0	0	0	0	0	0	0	0	0	0	0	0	0	0	0	0	0	0	0	0	0	0	0	0	0	0
>d102993	Otu02734	Saprotroph	TTAAGTTCAGCGGGTACTCCTACCTGATCCGAGGTCAAACTGGATAAAAATCTGACATCAGCGCCGATTGGGTCTTTGAGCGATAGAGATTCCCATACACTCAGACACCAGGACTCGGTGCTGCCACTGTATTTCAGGCCCGTCCATAGGGGACGATGGCCCAACACACAAGCCGTGCTTGAGGGGTTTGCAATGACGCTCGAACAGGCATGCCCCCCGGAATACCAGAGGGCGCAATGTTCGTTCAAAGATTCGATGATTCACGGAATTCTGCAATTCACATTACTTATCGCATTTCGCTGCGTTCTTCATCGATGACGAGTCTAG	JN943432	SH193112.07FU	327	Fungi	p__Ascomycota	c__Eurotiomycetes	o__Onygenales	f__Onygenaceae	g__unidentified	s__Onygenaceae_sp	2	298013 Onygenaceae_sp	9.1244e-130	0.99	97.5535	0	0	0	0	0	0	0	0	0	0	0	0	0	0	0	0	0	0	0	0	0	0	0	0	0	0	0	0	0	0	0
>a92658	Otu01352	Saprotroph	TTAAGTTCAGCGGGTATTCCTACCTGATTCGAGGTCAACTCTAATAAAATTGGGGTTGTTTTACGGCAGTGGCCGCCGTCACGTTCCCGTTGCGAGGTTGTGCTACTACGCAGGGGAGGCCGCGACGAGGCCGCCAATTCATTTCGGGGGCGGCGAGGGCGCTGCAAGACAAGCAGGCAGGCCCCTGTGCCGGTCCCCAACACCAAGTCCCCCGAAGGGGTCTTGAGGGTTGAAATGACGCTCGAACAGGCATGCCCGCCAGAATACTGGCGGGCGCAATGTGCGTTCAAAGATTCGATGATTCACTGAATTCTGCAATTCACATTACTTATCGCATTTCGCTGCGTTCTTCATCGATGACGAGTCTAG	AB099511	SH217934.07FU	369	Fungi	p__Ascomycota	c__Eurotiomycetes	o__Eurotiales	f__Trichocomaceae	g__Paecilomyces	s__Paecilomyces_marquandii	310	308446 Paecilomyces_marquandii	7.25772e-148	0.99	97.019	0	0	2	0	0	0	0	0	0	0	0	0	0	0	0	0	0	0	0	0	0	0	0	0	0	0	0	0	0	0	0
>a8964	Otu01465	Saprotroph	TTAAGTTCAGCGGGTATTCCTACCTGATTCGAGGTCAACTCTTAAAAGTTGGGCGTTTTACGGCAGTGGCCGCGTCGGGCTCCCGTTGCGAGGTTGTGCTACTACGCAGGGGTGGCACGCGACGAGGCCGCCAATTCATTTCGGGGGCGGCGCGGCGCAGAAGGCCAGGCCGTCCCCCAACACCAGGGTGTCTCCCCCTCCGAAAAGGGGGACCTGAGGGTTGAAATGACGCTCGAACAGGCATGCCCGCCAGAATACTGGCGGGCGCAATGTGCGTTCAAAGATTCGATGATTCACTGAATTCTGCAATTCACATTACTTATCGCATTTCGCTGCGTTCTTCATCGATGACGAGTCTAG	AB114223	SH217935.07FU	360	Fungi	p__Ascomycota	c__Eurotiomycetes	o__Eurotiales	f__Trichocomaceae	g__Paecilomyces	s__Paecilomyces_marquandii	102	308447 Paecilomyces_marquandii	1.15609e-145	1	96.9444	0	0	0	0	0	0	0	0	0	0	0	0	0	0	0	0	0	0	0	0	0	0	0	0	0	0	0	0	0	0	0
>b47082	Otu01609	Saprotroph	TTAAGTTCAGCGGGTATTCCTACCTGATCCGAGGTCAACTCTAAGAAAGTTGGGCGTTTTACGGCGTGACCGCCTCCGCGCTCCGGTGCGAGGTGTGTGCTACTACGCAGGGGAGGCTGCGGCGGGGTCGCCACTGCATTTCGGGGGCGGCTGGTGTGCCGTCCCCCAACACCGAGGCCCCCGGGGGGGCTCGAGGGTTGAAATGACGCTCGAACAGGCATGCCCGCCAGAATGCTGGCGGGCGCAATGTGCGTTCAAAGATTCGATGATTCACTGAATTCTGCAATTCACATTACTTATCGCATTTCGCTGCGTTCTTCATCGGTGACGAGTCTAG	AB104884	SH027729.07FU	337	Fungi	p__Ascomycota	c__Eurotiomycetes	o__Eurotiales	f__Trichocomaceae	g__Paecilomyces	s__Paecilomyces_sp	53	324715 Paecilomyces_nostocoides	1.26828e-134	0.99	96.7359	0	0	0	0	0	0	0	0	0	0	0	0	0	0	0	0	0	0	0	0	0	0	0	0	0	0	0	0	0	0	0
>a134160	Otu01675	Saprotroph	TTAAGTTCAGCGGGTATTCCTACCTGATTCGAGGTCAACTCTAATAAAATTGGGGTTGTTTTACGGCAGTGGCCGCCGTCACGTTCCCGTTGCGAGGTTGTGCTACTACGCAGGGGAGGCCGCGACGAGGCCGCCAATTCATTTCGGGGGCGGCATAGAGGCGCTGCAAGAAGCAGGCCGGGAACAGCCGGTCCCCAACACCAAGTCCCCCGAAGGGGTCTTGAGGGTTGAAATGACGCTCGAACAGGCATGCCCGCCAGAATACTGGCGGGCGCAATGTGCGTTCAAAGATTCGATGATTCACTGAATTCTGCAATTCACATTACTTATCGCATTTCGCTGCGTTCTTCATCGATGACGAGTCTAG	JN545823	SH217936.07FU	367	Fungi	p__Ascomycota	c__Eurotiomycetes	o__Eurotiales	f__Trichocomaceae	g__Paecilomyces	s__Paecilomyces_sp	28	308448 Paecilomyces_sp	1.9998e-147	0.99	97.0027	0	0	0	0	0	0	0	0	0	0	0	0	0	0	0	0	0	0	0	0	0	0	0	0	0	0	2	0	0	0	0
>b15860	Otu02466	Saprotroph	TTAAGTTCAGCGGGTATTCCTACCTGATCCGAGGCCAACTCTTAGGAAGCTGGTGCGTTTCACGGCGTGACCGTCTCCGCGCTCCGGTGCGAGGTGTGTGCTACTGCGCAGGGGAGGCTGCGGCGAGGTCGCCACTGCATTTCGGGGGCGGCCAGGGCCGTCCCCCAACGCCGGGCCCCCGGGGGGGCTCGAGGGTTGAAATGACGCTCGGACAGGCATGCCCGCCAGAGTGCTGGCGGGCGCAATGTGCGTTCAAAGATTCGATGGTTCACTGAATTCTGCAATTCACATTACTTATCGCATTTCGCTGCGTTCTTCATCGATGACGAGTCTAG	AB104884	SH027729.07FU	335	Fungi	p__Ascomycota	c__Eurotiomycetes	o__Eurotiales	f__Trichocomaceae	g__Paecilomyces	s__Paecilomyces_sp	2	324715 Paecilomyces_nostocoides	1.82935e-116	0.94	96.7164	0	0	0	0	0	0	0	0	0	0	0	0	0	0	0	0	0	0	0	0	0	0	0	0	0	0	0	0	0	0	0
>a35113	Otu02867	Saprotroph	TTAAGTTCAGCGGGTATCCCTACCTGATCCGAGGTCAACCTGGAAAAAAGTTTGGTTGATCGGCAGGCGCCGGCCAGTCCTACAAAGCGGGTGACAAAGCCCCATACGCTTGAGGACCGGACGCGGTGCCGCCGCTGCCTTTCGGGCCCGTCCCCCGGAAGGAGGACGGAGCCCAACACACAAGCCGTGCTTGAGGGCAGCAATGACGCTCGGACAGGCATGCCCTCCGGAATACCAGAGGGCGCAATGTGCGTTCAAAGACTCGATGATTCACTGAATTCTGCAATTCACATTACGTATCGCATTTCGCTACGTTCTTCATCGATGACGAGTCTAG	AY484912	SH267337.07FU	337	Fungi	p__Ascomycota	c__Eurotiomycetes	o__Eurotiales	f__Trichocomaceae	g__Penicillium	s__Penicillium_brevicompactum	2	311454 Penicillium_brevicompactum	4.57335e-135	0.99	97.6261	0	0	0	0	0	0	0	0	0	0	0	0	0	0	0	0	0	0	0	0	0	0	0	0	0	0	0	0	0	0	0
>a116625	Otu01762	Saprotroph	TTAAGTTCAGCGGGTATCCCTACCTGATCCGAGGTCAACCTGGATAGATTGATTTGGGGTCGCCGGCGGGCGCCGGCCGGGCCTACAGAGCGGGTGACAAAGCCCCATACGCTCGAGGACCGGACGCGGTGCCGCCGCTGCCTTTCGGGCCCGCCCCCCGAAGAACGGGGGGCGAAGCCCAACACACAAGCCGTGCTTGAGGGCAGCAATGACGCTCGGACAGGCATGCCCCCCGGAATACCAGGGGGCGCAATGTGCGTTCAAAGACTCGATGATTCACTGAATTCTGCAATTCACATTACGTATCGCATTTCGCTGCGTTCTTCATCGGTGACGAGTCTAG	GU981575	SH237642.07FU	343	Fungi	p__Ascomycota	c__Eurotiomycetes	o__Eurotiales	f__Trichocomaceae	g__Penicillium	s__Penicillium_onobense	20	311447 Penicillium_onobense	2.19029e-136	0.99	97.6676	0	0	0	0	0	0	0	0	0	0	0	0	0	0	0	0	0	0	0	0	0	0	0	0	0	0	0	0	0	0	0
>a15193	Otu01271	Saprotroph	TTAAGTTCAGCGGGTATCCCTACCTGATCCGAGGTCAACCTGGAAAAAAGTTTTGGTTGATCGGCAAGCGCCGGCCGGGCCTACAGAGCGGGTGACAAAGCCCCATACGCTCGAGGACCGGACGCGGTGCCGCCGCTGCCTTTCGGGCCCGTCCCCCCGGGAAGGGGGACGAGACCCAACACACAAGCCGGGCTTGAGGGCAGCAATGACGCTCGGACAGGCATGCCCCCCGGAATACCAGGGGGCGCAATGTGCGTTCAAAGACTCGATGATTCACTGAATTCTGCAATTCACATTACGTATCGCATTTCGCTGCGTTCTTCATCGATGACGAGTCTAG	AF033482	SH279507.07FU	340	Fungi	p__Ascomycota	c__Eurotiomycetes	o__Eurotiales	f__Trichocomaceae	g__Penicillium	s__Penicillium_sp	829	311445 Penicillium_madriti	2.03971e-128	0.96	97.6471	0	0	0	0	0	0	0	0	0	0	0	0	0	0	0	0	0	0	0	0	0	0	0	0	0	0	0	0	0	0	0
>c107554	Otu01320	Saprotroph	TTAAGTTCAGCGGGTATCCCTACCTGATCCGAGGTCAACCTGGAAAAAAGTTTTGGTTGATCGGCAAGCGCCGGCCGGGCCTACAGAGCGGGTGACAAAGCCCCATACGCTCGAGGACCGGACGCGGTGCCGCCGCTGCCTTTCGGGCCCGTCCCCCCGGGAAGGGGGACGAGACCCAACACACAAGCCGGGCCTGAGGGCAGCAATGACGCTCGGACAGGCATGCCCCCCGGAATACCAGGGGGCGCAATGTGCGTTCAAAGACTCGATGATTCACTGAATTCTGCAATTCACATTACGTATCGCATTTCGCTGCGTTCTTCATCGTTGACGAGTCTAG	AF033482	SH279507.07FU	340	Fungi	p__Ascomycota	c__Eurotiomycetes	o__Eurotiales	f__Trichocomaceae	g__Penicillium	s__Penicillium_sp	438	311445 Penicillium_madriti	1.2064e-126	0.96	97.6471	0	0	0	0	0	0	0	0	0	0	0	0	0	0	0	0	0	0	0	0	0	0	0	0	0	0	0	0	0	0	0
>a30850	Otu01519	Saprotroph	TTAAGTTCAGCGGGTATCCCTACCTGATCCGAGGTCAACCTGGAAAAAAGTTTGGTTGATCGGCAAGCGCCGGCCGGGCCTACAGAGCGGGTGACAAAGCCCCATACGCTCGAGGACCGGACGCGGTGCCGCCGCTGCCTTTCGGGCCCGCCCCCCGGGATCGGGGGGCGGGGCCCAACACACAAGCCGTGCTTGAGGGCAGCAATGACGCTCGGACAGGCATGCCCTCCGGAATACCAGAGGGCGCAATGTGCGTTCAAAGACTCGATGATTCACTGAATTCTGCAATTCACATTACGTATCGCATTTCGCTGCGTTCTTCATCGATGACGAGTCTAG	JX313157	SH199404.07FU	339	Fungi	p__Ascomycota	c__Eurotiomycetes	o__Eurotiales	f__Trichocomaceae	g__Penicillium	s__Penicillium_sp	62	300852 Penicillium_spathulatum	2.72425e-133	0.98	97.6401	0	0	0	0	0	0	0	0	0	0	0	0	0	0	0	0	0	0	0	0	0	0	0	0	0	0	0	0	0	0	0
>b2346	Otu02072	Saprotroph	TTAAGTTCAGCGGGTATCCTTATCTGATCCGAGGTCAACCGTTAAAAAGACGATCCCGAAAGACCGCTTCAGAAGACCGTCGGCCACTTCAAACCAGAGCGTTAATGATTCCATTCGCTCGATTCCGTGGTAATCGCGACGTCATTAATCCATTTCGGACCCGTCCCGCCGGAGCAGAACTAGAATCCAATAAAAAGCCGGGCTTTAAGGTTGTAATGACGCTCGGACAGATATACCCCCCGGAATACCAGAGGGTGCAATGTGCGTTCAAAGACTCGATGATTCACGGAATTCTGCAATTCACATTAGTTATCGCATTTCGCTGCGTTCTTCATCGTTGACGAGTCTAG	HM036605	SH187717.07FU	350	Fungi	p__Ascomycota	c__Eurotiomycetes	o__Eurotiales	f__Trichocomaceae	g__Penicillium	s__Penicillium_sp	7	295514 Penicillium_chrysogenum	3.68048e-134	0.97	97.7143	0	0	0	0	0	0	0	0	0	0	0	0	0	0	0	0	0	0	0	0	0	0	0	0	0	0	0	0	0	0	0
>d22403	Otu02143	Saprotroph	TTAAGTTCAGCGGGTATCCTTATCTGATCCGAGGTCAACCGTTAAAAAGACGATCCAAAAGGACCGCTTCAGAAGACCGTCGGCCACTTCAAATCAGAGCGTTAATGATTCCATTCGCTCGATTCCGTGGTAATCGCGACGTCATTAATCCATTTCGGACCTGTCCCGCCGAAGCAGAACTAGAATCCAATAAAAAGCCGGGCTTTAAGGTTGTAATGACGCTCGGACAGATATACCCCCCGGAATACCAGAGGGTGCAATGTGCGTTCAAAGACTCGATGATTCACGGAATTCTGCAATTCACATTAGTTATCGCATTTCGCTGCGTTCTTCATCGGTGACGAGTCTAG	HM036605	SH187717.07FU	350	Fungi	p__Ascomycota	c__Eurotiomycetes	o__Eurotiales	f__Trichocomaceae	g__Penicillium	s__Penicillium_sp	6	295514 Penicillium_chrysogenum	2.17684e-132	0.97	97.7143	0	0	0	0	0	0	0	0	0	0	0	0	0	0	0	0	0	0	0	0	0	0	0	0	0	0	0	0	0	0	0
>b50008	Otu02576	Saprotroph	TTAAGTTCAGCGGGTATCCCTACCTGATCCGAGGTCAACCTGATAAAAAGTTTGGTTGATCGGCAAGCGCCGGCCAGGCCTACAAAGCGAGTGACAAAGCCCCATACGCTTGAGGACCGGACGCGGTGCCGCCGCTGCCTTTCGGACCCGTCCCCCGGAAGGAGGACGGGGCCAAACACACAAGCCGTGCTTGAGGGCAGCAATGACGCTCGGACAGGCATGCCCTCCGGAATACCAGAGGGCGCAATGTGCGTTCAAAGACTCGATGATTCACTGAATTCTGCAATTCACATTACGTATCGCATTTCGCTGCGTTCTTCATCGTTGACGAGTCTAG	AY484912	SH267337.07FU	337	Fungi	p__Ascomycota	c__Eurotiomycetes	o__Eurotiales	f__Trichocomaceae	g__Penicillium	s__Penicillium_sp	2	311454 Penicillium_brevicompactum	5.59655e-128	0.96	97.6261	0	0	0	0	0	0	0	0	0	0	0	0	0	0	0	0	0	0	0	0	0	0	0	0	0	0	0	0	0	0	0
>d41608	Otu04497	Saprotroph	TTAAGTTCAGCGGGTATCCCTACCTGATCCGAGGTCAACCTGGAAAAAAGATTGATTGGTGTCGGCAGGCGCCGGCCAGACCTACAGAGCGGGTGACAAAGCCCCATACGCTCGAGGACCGGACGCGGTGCCGCCGCTGCCTTTCGGGCCCGTCCCGGGGGACGAGGGCCCAACACACAAGCCGTGCTTGAGGGCAGCAATGACGCTCGGACAGGCATGCCCCCCGGAATACCAGGGGGCGCAATGTGCGTTCAAAGACTCGATGATTCACTGAATTCTGCAATTCACATTACGTATCGCATTTCGCTGCGTTCTTCATCGGTGACGAGTCTAG	JX545192	SH182527.07FU	334	Fungi	p__Ascomycota	c__Eurotiomycetes	o__Eurotiales	f__Trichocomaceae	g__Penicillium	s__Penicillium_sp	2	293216 Penicillium_sp	2.05797e-132	0.99	96.7066	0	0	0	0	0	0	0	0	0	0	0	0	0	0	0	0	0	0	0	0	0	0	0	0	0	0	0	0	0	0	0
>a82273	Otu02871	Saprotroph	TTAAGTTCAGCGGGTATCCCTACCTGATCCGAGGTCAACCTGAAAAGGATGATTGGTTGTCGGCTGGCGCCGGCCGGGCCTACAGAGCGGGTGACAAAGCCCCATACGCTCGAGGACCGGACTCGGTGCCGCCGCTGCCTTTCGGGCCCGTCCCCGGGGGGACGGAGCCCAACACACAAGCCGTGCTTGAGGGCAGCAATGACGCTCGGACAGGCATGCCCCCCGGAATACCAGGGGGCGCAATGTGCGTTCAAAGACTCGATGATTCACTGAATTCTGCAATTCACATTAGTTATCGCATTTCGCTGCGTTCTTCATCGTTGACGAGTCTAG	AY373933	SH207148.07FU	333	Fungi	p__Ascomycota	c__Eurotiomycetes	o__Eurotiales	f__Trichocomaceae	g__Penicillium	s__Penicillium_spinulosum	2	303965 Penicillium_spinulosum	2.05054e-132	0.99	97.5976	0	0	0	0	2	0	0	0	0	0	0	0	0	0	0	0	0	0	0	0	0	0	0	0	0	0	0	0	0	0	0
>a127605	Otu01843	Saprotroph	TTAAGTTCAGCGGGTATCCCTACCTGATCCGAGGTCAACCTGGATAGATTGATTGGGGGTCGCCGGCGGGCGCCGGCCGGGCCTACAGAGCGGGTGACGAAGCCCCATACGCTCGAGGACCGGACGCGGTGCCGCCGCTGCCTTTCGGGTCCGCCCCCCGGAACCGGGGGGCGGGGCCCAACACACAAGCCGTGCTTGAGGGCAGCAATGACGCTCGGACAGGCATGCCCCCCGGAATACCAGGGGGCGCAATGTGCGTTCAAAGACTCGATGATTCACTGAATTCTGCAATTCACATTACGTATCGCATTTCGCTGCGTTCTTCATCGATGACGAGTCTAG	KC346350	SH237541.07FU	342	Fungi	p__Ascomycota	c__Eurotiomycetes	o__Eurotiales	f__Trichocomaceae	g__Penicillium	s__Penicillium_subrubescens	14	311448 Penicillium_subrubescens	3.69027e-138	0.99	97.6608	0	0	0	0	0	0	0	0	0	0	0	0	0	0	0	0	0	0	0	0	0	0	0	0	0	0	0	0	0	0	0
>a25670	Otu01386	Saprotroph	TTAAGTTCAGCGGGTATCCCTACCTGATCCGAGGTCAACCTGGATAAAAGTTTGGTTGATCGGCAAGCGCCGGCCGGGCCTACAGAGCGGGTGACAAAGCCCCATACGCTCGAGGACCGGACGCGGTGCCGCCGCTGCCTTTCGGGCCCGTCCCCCGGGAGCGGAGGACGGGGCCCAACACACAAGCCGTGCTTGAGGGCAGCAATGACGCTCGGACAGGCATGCCCTCCGGAATACCAGAGGGCGCAATGTGCGTTCAAAGACTCGATGATTCACTGAATTCTGCAATTCACATTACGTATCGCATTTCGCTGCGTTCTTCATCGATGACGAGTCTAG	AJ748692	SH199407.07FU	339	Fungi	p__Ascomycota	c__Eurotiomycetes	o__Eurotiales	f__Trichocomaceae	g__Penicillium	s__Penicillium_virgatum	210	300855 Penicillium_virgatum	5.98914e-136	0.99	97.6401	0	0	0	0	0	0	0	0	0	0	0	0	0	0	0	0	0	0	0	0	0	0	0	0	0	0	0	0	0	0	0
>a1800	Otu01562	Saprotroph	TTAAGTTCAGCGGGTATCCCTACCTGATCCGAGGTCAACCTGGATAAAAGTTTGGTTGATCGGCAAGCGCCGGCCGGGCCTACAGAGCGGGTGACAAAGCCCCATACGCTCGAGGACCGGACGCGGTGCCGCCGCTGCCTTTCGGGCCCGTCCCCCGGGAGCGGAGGACGGGGCCCAACACACAAGCCGTGCTTGAGGGCAGCAATGACGCTCGGACAGGCATGCCCTCCGGAATACCAGAGGGCGCAATGTGCGTTCAAAGACTCGATGATTCACTGAATTCTGCAATTCACATTACGTATCGCATTTCGCTGCGTTCTTCATCGTTGACGAGTCTAG	AJ748692	SH199407.07FU	339	Fungi	p__Ascomycota	c__Eurotiomycetes	o__Eurotiales	f__Trichocomaceae	g__Penicillium	s__Penicillium_virgatum	44	300855 Penicillium_virgatum	4.60601e-135	0.99	97.6401	0	0	0	0	0	0	0	0	0	0	0	2	0	0	0	0	0	0	0	0	0	0	0	0	0	0	0	0	0	0	0
>d66511	Otu04464	Saprotroph	TTAAGTTCAGCGGGTATCCCTACCTGATCCGAGGTCAACCTGAATAAAAGTGTGGTTGATCGGCAGGCGCCGGCCGGGCCTACAGAGCGGGTGACAAAGCCCCATACGCTCGAGGACCGGACGCGGTGCCGCCGCTGCCTTTCAGGCCCGTCCCCCGCGAGCGGAGGACGGGGCCTAACACACAAGCCGTGCTTGAGGGCAGCAATGACGCTCGGACAGGCATGCCCTCCGGAATACCAGAGGGCGCAATGTGCGTTCAAAGACTCGATGATTCACTGAATTCTGCAATTCACATTACGTATCGCATTTCGCCACGTTCTTCATCGATGACGAGTCTAG	AJ748692	SH199407.07FU	339	Fungi	p__Ascomycota	c__Eurotiomycetes	o__Eurotiales	f__Trichocomaceae	g__Penicillium	s__Penicillium_virgatum	2	300855 Penicillium_virgatum	7.3291e-129	0.96	97.6401	0	0	0	0	0	0	0	0	0	0	0	0	0	0	0	0	0	0	0	0	0	0	0	0	0	0	0	0	0	0	0
>b113346	Otu01991	Saprotroph	TTAAGTTCAGCGGGTAACTCCTACCTGATCCGAGGTCAACCGTGGTAAAATATGGTGGTGACCAACCCCCGCAGGTCCTTCCCGAGCGAGTGACAAAGCCCCATACGCTCGAGGACCATACGGACGTCGCCGCTGCCTTTCGGGCAGGTCCCCGGGGGGACCACACCCAACACACAAGCCGTGCTTGAGGGCAGAAATGACGCTCGGACAGGCATGCCCCCCGGAATGCCAGGGGGCGCAATGTGCGTTCAAAGATTCGATGATTCACGGAATTCTGCAATTCACATTACTTATCGCATTTCGCTGCGTTCTTCATCGATGACGAGTCTAG	JN899319	SH282948.07FU	331	Fungi	p__Ascomycota	c__Eurotiomycetes	o__Eurotiales	f__Trichocomaceae	g__Talaromyces	s__Talaromyces_calidicanius	6	311381 Talaromyces_calidicanius	2.03568e-132	0.99	97.5831	0	0	0	0	0	0	0	0	0	0	0	0	0	0	0	0	0	0	0	0	0	0	0	0	0	0	0	0	0	0	0
>a40507	Otu01432	Saprotroph	TTAAGTTCAGCGGGTATCCCTACCTGATCCGAGGTCAACCTTGTTATGATGTGGGTTGATGGCGAGCCCCGGCCGGCCTCCTGAGCGGGTGACAGAGCCCCATACGCTCGAGGACCGGACGCGACGCCGCCGCTGCCTTTCAGGCCCGTCCCCGAGGGGGACGAGGCCCAACACACAAGCCGAGCTTGAGGGTTAGCAATGACGCTCGGACAGGCATGCCCCCCGGAATGCCAGGGGGCGCAATGTGCGTTCAAAGATTCAATGATTCACGGAATTCTGCAATTCACATTACTTATCGCATTTCGCTGCGTTCTTCATCGTTGACGAGTCTAG	L14525	SH208846.07FU	333	Fungi	p__Ascomycota	c__Eurotiomycetes	o__Eurotiales	f__Trichocomaceae	g__Talaromyces	s__Talaromyces_luteus	139	304675 Talaromyces_luteus	2.05054e-132	0.99	97.5976	0	0	0	0	0	0	0	0	0	0	0	0	0	0	0	0	0	0	0	0	0	0	0	0	0	0	0	0	0	0	0
>a139712	Otu01779	Saprotroph	TTAAGTTCAGCGGGTAACCCTACCTGATCCGAGGTCAACCGAAGGTAGACGGGCCCCGAAGGGTCGCCTGGAGGAAGACCAGCGCCGACGAGTCCGTCCCGAGCGGGTGACAAAGCCCCATACGCTCGAGGACCCGACGCGGCGCCGCCACTGCCTTTGGGGCGTGTCCCCGGGGGGACAACACCCAACACCCAGCCGGGCTGGAGGGCAGAAATGACGCTCGGACAGGCATGCCCCCCGGAATGCCAGGGGGCGCAATGTGCGTTCAAAGATTCGATGATTCACGGAATTCTGCAATTCACATTACTTATCGCATTTCGCTGCGTTCTTCATCGTTGACGAGTCTAG	JN899374	SH194211.07FU	348	Fungi	p__Ascomycota	c__Eurotiomycetes	o__Eurotiales	f__Trichocomaceae	g__Talaromyces	s__Talaromyces_sp	18	298547 Talaromyces_rugulosus	1.3181e-134	0.98	97.7011	0	0	0	0	0	0	0	0	0	0	0	0	0	0	0	0	0	0	0	0	0	0	0	0	0	0	0	0	0	0	0
>a127015	Otu01666	Saprotroph	TTAAGTTCAGCGGGTATCCCTACCTGATCCGAGGTCAACCTGGAAAGAAATTGGTTGATCGGCAGGCGCCGGCCGGGCCTACAGAGCGGGTGACAAAGCCCCATACGCTCGAGGACCAGACGCGGTGCCGCCGCTGCCTTTCGGGCCCGTCCCCGGGAGGGGGGACGAGACCCAACACACAAGCCGGGCTTGAGGGCAGCAATGACGCTCGGACAGGCATGCCCCCCGGAATACCAGGGGGCGCAATGTGCGTTCAAAGACTCGATGATTCACTGAATTCTGCAATTCACATTACGTATCGCATTTCGCTGCGTTCTTCATCGATGACGAGTCTAG	HM239866	SH207153.07FU	336	Fungi	p__Ascomycota	c__Eurotiomycetes	o__Eurotiales	f__Trichocomaceae	g__unidentified	s__Trichocomaceae_sp	26	303970 Trichocomaceae_sp	1.26375e-134	0.99	97.619	0	0	0	0	0	0	0	0	0	0	0	0	0	0	0	0	0	0	0	0	0	0	0	0	0	0	0	0	0	0	0
>a143442	Otu02869	Unclassified	TTAAGTTCAGCGGGTATTCCTACCTGATCCGAGGTCAACCTTGAGAAATAAAGGGGTGATAAACCGGGCCATATGACTACTAGATGCGTGCTGTTATAAGCTCGTTGCATATAGAGTCTTTACGACACCGGTCATTATCTTTTGGACCTATCACCAGGTGACAAAGGACCCAACGATAAGCCAAGCTTAATAGTTTGATAATGACGCTCGAACAGGCATGCCCTTCGGAATACCAAAGGGCGCAATGTGCGTTCAAAGATTCGATGACTCACTGAATTCTGCAATTCGCATTACTTATCGCATTTCGCTGCGTTCTTCATCGTTGACGAGTCTAG	AY970044	SH021611.07FU	335	Fungi	p__Ascomycota	c__Eurotiomycetes	o__Chaetothyriales	f__unidentified	g__unidentified	s__Chaetothyriales_sp	5	321699 Chaetothyriales_sp	5.22942e-120	0.96	93.4328	0	0	0	0	0	0	0	0	0	0	0	0	0	0	0	0	0	0	0	0	0	0	0	0	0	0	0	0	0	0	0
>a46624	Otu01631	Unclassified	TTAAGTTCAGCGGGTATTCCTACCTGATCCGAGGTCAACCTTGGTATAAAAGTTGGGAACGCCGAAGCGAACCCGAAGACCGGGTCTGCAAGTATCAGCCTAGTACGTGCCCGAAAGCTCAGTGTACAGGTGTCCTCACAGACGCCGTCATTATCTTTGAGACGGGCGGTACGCCACTAAAGGCCGCCGCCGACGTCCAACAACAAGCCGGGCTTGAGGGGTGATAATGACGCTCGAACAGGCATGCCCCCCGGAATACCAGAGGGCGCAATGTGCGTTCAAAGATTCGATGACTCACGGATTCTGCAATTCGCATTACTTATCGCATTTCGCTGCGTTCTTCATCGATGACGAGTCTAG	GU225947	SH105839.07FU	360	Fungi	p__Ascomycota	c__Eurotiomycetes	o__Chaetothyriales	f__Chaetothyriaceae	g__Cyphellophora	s__Cyphellophora_sp	43	311275 Cyphellophora_vermispora	6.83772e-144	0.99	96.9444	0	0	6	0	0	0	0	0	0	0	0	0	0	0	0	0	0	0	0	0	0	0	0	0	0	0	0	0	0	0	0
>d45441	Otu01988	Unclassified	TTAAGTTCAGCGGGTATTCCTACCTGATCCGAGGTCAACCTTGTGGTAATGGGTGTCCCCGCGGGGGGGACGGCGACCGGGTCTGGACTTCTAGCCGTGTACGTGCCCGAAAGCTCAGTGTACAGGAGTCGTCGCAGACGCCGTCATTATCTTTGGGAGGAGCGGGATAAGCGCTGCATCCAACAACAAGCCGGGCTTGAGGGGTGATAATGACGCTCGAACAGGCATGCCCTCCGGAATACCAGAGGGCGCAATGTGCGTTCAAAGATTCGATGACTCACGGATTCTGCAATTCGCATTACTTATCGCATTTCGCTGCGTTCTTCATCGTTGACGAGTCTAG	AY833038	SH197861.07FU	343	Fungi	p__Ascomycota	c__Eurotiomycetes	o__Chaetothyriales	f__Chaetothyriaceae	g__Cyphellophora	s__Cyphellophora_sp	11	300214 Cyphellophora_sp	2.848e-137	0.99	96.793	0	0	0	0	0	0	0	0	0	0	0	0	0	0	0	0	0	0	0	0	0	0	0	0	0	0	0	0	0	0	0
>a72048	Otu01730	Unclassified	TTAAGTTCAGCGGGTATTCCTACCTGATCCGAGGTCAACCTTAGAAGTAAAAGGCAAGGGGAGACCCCCCACCTCTTTGGTTAAACGGTGTCTGGAAGCCTGACCAAGTACGTGCCCGAAAGCTCAGTGTACTGGAGTCCTCAGCAGACGCCGTCATTATCTTTGGGGCCAGCCCGTTTAACGGGGCTTAGTCCAACAACAAGCCGGGCTTGAGGGGTGATAATGACGCTCGAACAGGCATGCCCTTCGGAATACCAAAGGGCGCAATGTGCGTTCAAAGATTCGATGACTCACGGATTCTGCAATTCGCATTACTTATCGCATTTCGCTGCGTTCTTCATCGATGACGAGTCTAG	EU977268	SH020780.07FU	356	Fungi	p__Ascomycota	c__Eurotiomycetes	o__Chaetothyriales	f__unidentified	g__unidentified	s__Eurotiomycetes_sp	34	321264 Chaetothyriales_sp	9.70029e-91	0.85	96.9101	0	0	0	0	0	0	0	0	0	0	0	0	0	0	0	0	0	0	0	0	0	0	0	0	0	0	0	0	0	0	0
>a17787	Otu04387	Unclassified	TTAAGTTCAGCGGGTAACCCTACCTGATCCGAGGTCAATCGAAGAAAAATTCGATGGATAGACAGGCCCCGCGCCGACCTCCCAGAGCGGGTGACAAAGCCCCATACGCTCGAGGACCAGACGCGACACCGCCGCTGCCTTTCAGACCCGTCCCTCCGCCATCAAAGGGGGAAAGGGGGACGGTGGCCCAACACACAAGCCGTGCTTGAGGGACAGAAATGACGCTCGGACAGGCATGCCCTCCGGAATACCAGAGGGCGCAATATGCGTTCAAAGATTCGATGATTCACGGAATTCTGCAATTCACATTACTTATCGCATTTCGCTGCGTTCTTCATCGTTGACGAGTCTAG	JF417488	SH208853.07FU	353	Fungi	p__Ascomycota	c__Eurotiomycetes	o__unidentified	f__unidentified	g__unidentified	s__Eurotiomycetes_sp	2	304682 Rasamsonia_brevistipitata	2.91686e-102	0.87	97.7337	0	0	0	0	0	0	0	0	0	0	0	0	0	0	0	0	0	0	0	0	0	0	0	0	0	0	0	0	0	0	0
>d127514	Otu04431	Unclassified	TTAAGTTCAGCGGGTATCCCTACCTGATCCGAGGTCAACCTTAGAAAGATTCTCCCTGAGGGGAGGCAGACCGTGTCCGGTAAACCCATGTGTCCGATACGTGTCCCGTGAAGAACTCAGTGTACCGGGGGTCCAACGAGGCCGCCGTCATTGGCTTTGGGGGGGGCACCACCAAACCGTCCAACACCAAGCCGAGGGCTTGAGGTGTGATAATGACGCTCGAACAGGCATGCCCTTCGGAATACCAAAGGGCGCAATGTGCGTTCAAAGATTCGATGACTCACTGGAATTCTGCAATTCGCATTACTTATCGCATTTCTCCACGTTCTTCATCGTTGACGAGTCTAG	KJ630571	SH188931.07FU	348	Fungi	p__Ascomycota	c__Eurotiomycetes	o__Chaetothyriales	f__Herpotrichiellaceae	g__unidentified	s__Eurotiomycetes_sp	2	296120 Fonsecaea_sp_MFLUCC_10_0763	3.50916e-95	0.86	96.8391	0	0	0	0	0	0	0	0	0	0	0	0	0	0	0	0	0	0	0	0	0	0	0	0	0	0	0	0	0	0	0
>a9489	Otu01317	Unclassified	TTAAGTTCAGCGGGTATCCCTACCTGATCCGAGGTCAACCTTGATAAAAAAAGATTCTCCCTGAGGGGAGGCAGACCGTGTCCCGTGAACCCATGTGTCCGATACGTGTCCCGTGAAGAACTCAGTGTACCGGGGGTCCAACGAGGCCGCCGTCATTGTCTTTGGGAGGGGTAGAAGCCCGCAAAGGGGGTCTCCACCAAGCCGTCCAACACCAAGCCGAGGGCTTGAGGGGTGATAATGACGCTCGAACAGGCATGCCCTTCGGAATACCAAAGGGCGCAATGTGCGTTCAAAGATTCGATGACTCACTGGAATTCTGCAATTCGCATTACTTATCGCATTTCGCTGCGTTCTTCATCGTTGACGAGTCTAG	GQ302685	SH197657.07FU	373	Fungi	p__Ascomycota	c__Eurotiomycetes	o__Chaetothyriales	f__Herpotrichiellaceae	g__Exophiala	s__Exophiala_sp	407	300140 Exophiala_sp_Ppf18	8.99536e-141	0.97	97.0509	4	0	2	0	0	0	0	0	2	5	7	9	3	0	4	2	25	2	0	0	0	0	0	0	0	0	0	0	0	2	0
>c73310	Otu01737	Unclassified	TTAAGTTCAGCGGGTATCCCTACCTGATCCGAGGTCAGCCTTGATAAAAAAAGATTCTCCCTGAGGGGAGGCAGACCGTGTCCCGTGAACCCATGTGTCCGATACGTGTCCCGTGAAGAACTCAGTGTACCGGGGGTCCAACGAGGCCGCCGTCATTGTCTTTGGGAGGGGTAGAAGCCCGCAAAGGGGGTCTCCACCAAGCCGTCAAACACCAAGCCGAGGGCTTGAGGGGTGATAATGACGCTCGAACAGGCATGCCCTTCGGAATACCAAAGGGCGCAATGTGCGTTCAAAGATTCGATGACTCACTGGAATTCTGCAATTCGCATTACTTATCGCATTTCGCTGCGTTCTTCATCGTTGACGAGTCTAG	GQ302685	SH197657.07FU	373	Fungi	p__Ascomycota	c__Eurotiomycetes	o__Chaetothyriales	f__Herpotrichiellaceae	g__Exophiala	s__Exophiala_sp	18	300140 Exophiala_sp_Ppf18	5.32035e-139	0.96	97.0509	0	0	0	0	0	0	0	0	0	0	0	2	0	0	5	0	0	0	0	0	0	0	0	0	0	0	0	0	0	0	0
>d10346	Otu04263	Unclassified	TTAAGTTCAGCGGGTATCCCTACCTGATCCGAGGTCAACCTTGATAAAAAGATTCTCCCTGAGGGGAGGCAGACCGTGTCCCGTAAACCCGTGTGTCCGATACGTGTCCCGTGAAGAGCTCAATGTACCGGGGGTCCAACGAGGCCGCCGTCATTGTCTTTGGGAGGGGTAGAAGCCCGCGAAGGGGTCTCCACCAAACCGTCCAACACCAAACCGAGGGCTTGAGGGGTGATAATGACGCTCGAACAGGCATGCCCTTCGGAATACCAAAGGGCGCAATGTGCGTTCAAAGATTCGATGACTCACTGGAATTCTGCAATTCGCATTACTTATCGCATTTCGCTGCGTTCTTCATCGTTGACGAGTCTAG	AM176667	SH015504.07FU	370	Fungi	p__Ascomycota	c__Eurotiomycetes	o__Chaetothyriales	f__Herpotrichiellaceae	g__Exophiala	s__Exophiala_sp	2	318596 Exophiala_salmonis	1.12393e-137	0.96	97.027	0	0	0	0	0	0	0	0	0	0	0	0	0	0	0	0	0	0	0	0	0	0	0	0	0	0	0	0	0	0	0
>c152760	Otu04308	Unclassified	TTAAGTTCAGCGGGTATCCCTACCTGATCCGAGGTCAACCTTAGAAAAAAGTTCTCCCTGAGGGGAGGCAGACCGTTGCCCGTGAACCCTTTTTCCAGTACGTGTTCGGTGAAGAACTCAGTGTACCGGGGGTCCAACGAGGCCGCCGTCATTGTCTTTGGGAGGGGTAAATAAAAAATATATTCACCAAACCGTCCAACACCAAGCCGAAGGGCTTGAGGGGTGATAATGACGCTCGAACAGGCATGCCCTTCGGAATGCCAAAGGGCGCAATGTGCGTTCAAAGATTCGATGACTCACTGGAATTCTGCAATTCGCATTACTTATCGCATTTCGCTGCGTTCTTCATCGATGACGAGTCTAG	GQ921793	SH015507.07FU	364	Fungi	p__Ascomycota	c__Eurotiomycetes	o__Chaetothyriales	f__Herpotrichiellaceae	g__Exophiala	s__Exophiala_sp	2	318599 Exophiala_sp	7.97884e-129	0.94	96.978	0	0	0	0	0	0	0	0	0	0	0	0	0	0	0	0	0	0	0	0	0	0	0	0	0	0	0	0	0	0	0
>a100881	Otu01951	Unclassified	TTAAGTTCAGCGGGTATCCCTACCTGATCCGAGGTCAACCTTAGAAAGATTCTCCCTGAGGGGAGGCAGACCGTGTCCCGTAAACCCGTGTATCCGATACGTGTCCCGTGAAGAACTCAGTGTACCGGGGGTCCAACGAGGCCGCCGTCATTGTCTTTGGGAGGGGTAGAAGCCCGCGAGGGGTCTCCACCAAACCGTCCAACACCAAGCCGGGGGCTTGAGGGGTGATAATGACGCTCGAACAGGCATGCCCTTCGGAATACCAAAGGGCGCAATGTGCGTTCAAAGATTCGATGACTCACTGGAATTCTGCAATTCGCATTACTTATCGCATTTCGCTGCGTTCTTCATCGGTGACGAGTCTAG	HQ446088	SH197652.07FU	366	Fungi	p__Ascomycota	c__Eurotiomycetes	o__Chaetothyriales	f__Herpotrichiellaceae	g__unidentified	s__Herpotrichiellaceae_sp	9	300135 Herpotrichiellaceae_sp	1.99335e-147	0.99	96.9945	0	0	0	0	0	0	0	0	0	0	0	0	0	0	2	0	0	0	0	0	0	0	0	0	0	0	0	0	0	0	0
>a59369	Otu02463	Unclassified	TTAAGTTCAGCGGGTATTCCTACCTGATCCGAGGTCAACACTTTACTAAGTTAAAAAAGACCGTCGCCCGCAGAGTCGTCCCGCGTACATGCTCGTGAAAGCTCCTCGTACCGGTTCCCTCTGGGACGCCGTCACTATCTTTGGGGCGGGTGGTCGGGTACGACCACCGGGAGCCCAACACCAAGCCGGGGCTTGAGTGGTGATAATGACGCTCGAACAGGCATGCCCTTCGGAATGCCAAAGGGCGCAATATGCGTTCAAAGATTCGATGACTCACGGATTCTGCAATTCGCATTACTTATCGCATTTCGCTGCGTTCTTCATCGGTGACGAGTCTAG	FJ197905	SH016651.07FU	339	Fungi	p__Ascomycota	c__Eurotiomycetes	o__Chaetothyriales	f__Herpotrichiellaceae	g__unidentified	s__Herpotrichiellaceae_sp	2	319140 Herpotrichiellaceae_sp	9.24513e-126	0.96	96.7552	0	0	0	0	0	0	0	0	0	0	0	0	0	0	0	0	0	0	0	0	0	0	0	0	0	0	0	0	0	0	0
>d129409	Otu04361	Unclassified	TTAAGTTCAGCGGGTATCCCTACCTGATCCGAGGTCAACCTGGTAAAATTTCCCTGCAAAGGGAGAAGACCGTGACTCGCCAACCCTTATTCCCGTACGTGCTCAGTTAAGAAGCTCAGTGTACCGGGGGTCAGACAAAGCCGCCGTCGTTGTCTTTAGGAGGGGTCGGGCGAACGCCCGACCAACCATCCAAGGCCAAACCCAGGGGGCTTGAGAGGTGAAAATGACGCTCGAACAGGCATGCCCTTCGGAATGCCAAAGGGCGAAATGTGCGTTCAAAGATTCGATGACTCACTGGAATTCTGCAATTCGCATTACTTATCTCATTTCGCTACGTTCTTCATCGATGACGAGTCTAG	AM711383	SH198015.07FU	359	Fungi	p__Ascomycota	c__Eurotiomycetes	o__Chaetothyriales	f__Herpotrichiellaceae	g__unidentified	s__Herpotrichiellaceae_sp	2	300282 Herpotrichiellaceae_sp	1.45351e-142	0.99	96.9359	0	0	0	0	0	0	0	0	0	0	0	0	0	0	0	0	0	0	0	0	0	0	0	0	0	0	0	0	0	0	0
>a17640	Otu01450	Unclassified	TTAAGTTCAGCGGGTATCCCTACCTGATCCGAGGTCAACCACGAAAGTTCACAAGGCCTCAACCAAAAGTTGGTCAAGACTGAGAAGGCCAGCGCCGGCCGGGCCACCAGAGCGGGTGATTGAAGCCCATACGCTCGGGCACCGGACACGGAGCCGCCACTGCCTTTCGGGCGCGTCCAGCGGGGACGACGCCCAACACACAAGCCGGGCTTGAAGGGGTTGCAATGACGCTCGGACAGGCATGCCCCCCGGAATACCAGAGGGCGCAATGTGCGTTCAAAGATTCGATGATTCACGGAATTCTGCAATTCACATTACTTATCGCATTTCGCTGCGTTCTTCATCGATGACGAGTCTAG	DQ421235	SH214059.07FU	359	Fungi	p__Ascomycota	c__Eurotiomycetes	o__Onygenales	f__unidentified	g__unidentified	s__Onygenales_sp	116	306829 Onygenales_sp	1.15227e-145	0.99	97.7716	0	0	0	0	0	0	0	0	0	0	0	0	0	0	0	0	0	0	0	0	0	0	0	0	0	0	0	0	0	0	0
>b99101	Otu01492	Unclassified	TTAAGTTCAGCGGGTATCCCTACCTGATCCGAGGTCAACCTGAAAAGAAGTTCACCAAGTCGGCAGGCACCGGCCGGGCCTCAGAGCGGGTGATAAGCCCATACGCTCGGGCACCGGAGCACGGTACCGCCACTGCATTTCGGGCACGTCCACAGGGGACGAGGCCCAACACACAAGCCGCGCTTGAGGGTTGCAATGACGCTCGGACAGGCATGCCCCCCGGAATACCAGGGGGCGCAATGTGCGTTCAAAGATTCGATGATTCACGGAATTCTGCAATTCACATTACTTATCGCATTTCGCTGCGTTCTTCATCGTTGACGAGTCTAG	HG327917	SH197967.07FU	330	Fungi	p__Ascomycota	c__Eurotiomycetes	o__Onygenales	f__unidentified	g__unidentified	s__Onygenales_sp	82	300261 Onygenales_sp	1.19962e-130	0.99	96.6667	0	0	0	0	0	0	0	0	0	0	0	0	0	0	0	0	0	0	0	0	0	0	0	0	0	0	0	0	0	0	0
>a45398	Otu03107	Unclassified	TTAAGTTCAGCGGGTATTCCTACCTGATCCGAGGTCAACCGATGGGAGGCGGACTTGCGTCCACACTCTGTTTGGAGACCAGCGCGCACGATCACATCCTGGAGTAGACAGTAAAGCCCATACACTCAGACGCTTAGATCACGGCGCCGCCACTGCCTTTGGGACCCGTCCTTCTTAGGGGACGATGGCCCAACACACAAGCCGCGCTTGGGGGGTTGCAATGACGCTCGGACAGGCATGCCCTCCGGAATACCAGAGGGCGCAATGTGCGTTCAAAGATTCGATGATTCACGGAATTCTGCAATTCACATTACTTATCGCATTTCGCTACGTTCTTCATCGATGACGAGTCTAG	AJ271422	SH016788.07FU	355	Fungi	p__Ascomycota	c__Eurotiomycetes	o__Onygenales	f__unidentified	g__unidentified	s__Onygenales_sp	2	319210 Auxarthron_kuehnii	8.82673e-79	0.82	97.7465	0	0	0	0	0	0	0	0	0	0	0	0	0	0	0	0	0	0	0	0	0	0	0	0	0	0	0	0	0	0	0
>a11568	Otu01738	Unclassified	TTAAGTTCAGCGGGTATCCCTACCTGATCCGAGGTCAACCTGTAAAAATTGGGGGTTGCTGGCAAGTAGACCTACCGGACCCAGACGCGAGGAGTATTACTACGCGTAGAGCCGACAGGCACCGCCACTGATTTTAGGAGCCGCGAAACCGCGAACCCCAATACCAAGCGAGAGCTTGAGTGGTTATAATGACGCTCGAACAGGCATGCCCCCCGGAATACCAGAGGGCGCAATGTGCGTTCAAAGATTCGATGATTCACTGAATTCTGCAATTCACATTACTTATCGCATTTCGCTGCGTTCTTCATCGTTGACGAGTCTAG	AF083204	SH008250.07FU	323	Fungi	p__Ascomycota	c__Eurotiomycetes	o__Chaetothyriales	f__Herpotrichiellaceae	g__Phialophora	s__Phialophora_sp	45	315392 Phialophora_sp_RR_90_121	8.72058e-126	0.98	96.5944	0	0	0	0	0	0	0	0	0	0	0	0	0	0	0	0	0	0	0	0	0	0	0	0	0	0	0	0	0	0	0
>c147250	Otu03614	Unclassified	TTAAGTTCAGCGGTATCCCTACCTGATCCGAGGTCAACCTTATGATAAGTTGGGGTTGTTGGCAAGTACAATCAAGACCCTATAGCGAGAAAATTACTACGCGTAGAGCTTTAAGAGCACCGCCACTGATTTTAAGAGAGGCCAGTACAGGCCAACTCCAAGTCCACCACAAGGGTGATTTGGTCATTATGACGCTCGAACAGGCATGCCCTCCGGAATACCAGAGGGCGCAATGTGCGTTCAAAGATTCGATGATTCACTGAATTCTGCAATTCACATTACTTATCGCATTTCGCTGCGTTCTTCATCGGTGACGAGTCTAG	JN113039	SH013880.07FU	323	Fungi	p__Ascomycota	c__Eurotiomycetes	o__Chaetothyriales	f__Herpotrichiellaceae	g__Phialophora	s__Phialophora_sp	2	317874 Phialophora_sp_MLB_Phi	6.50623e-121	0.97	96.5944	0	0	0	0	0	0	0	0	0	0	0	0	0	0	0	0	0	0	0	0	0	0	0	0	0	0	0	0	0	0	0
>b8398	Otu02647	Unclassified	TTAAGTTCAGCGGGTAATCCTACCTGATTTGAGGCCAGAGCTTTAAGTCATGGGTCAGACTACAAGTAGTCGTTCGCCGGGTTAGAAGCAGACGCGTGTACATAGATGGCAGGGGCGGCCAGAAGCCGCCGCCTCAACGAATGACTTTATCACGTTGAGGACACCTACGCGTTACATACGGTCCAGCTAATACATTTGAGGTGAGCTGTCATACAACAGCAAGCACCCAAGGACCAACCCCAAGCAATGCAATAAAGCATTGAGGGTTGAGAATTCATGACACTCAAACAGGCATGCTCCTCGGAATACCAAGGAGCGCAAGGTGCGTTCAAAGATTCGATGATTCACTGAATTCTGCAATTCACATTACTTATCGCATTTCGCTGCGTTCTTCATCGT…	JQ910878	SH188092.07FU	411	Fungi	p__Basidiomycota	c__Exobasidiomycetes	o__Entylomatales	f__unidentified	g__unidentified	s__Entylomatales_sp	2	295664 Entylomatales_sp	1.5649e-165	0.99	97.3236	0	0	0	0	0	0	0	0	0	0	0	0	0	0	0	0	0	0	0	0	0	0	0	0	0	0	0	0	0	0	0
>a24990	Otu02088	Unclassified	TTAAGTTCAGCGGGTAATCCTACCTGATTTGAGGCCAGAGCTTTAAGTCATGGGTCAGACTGCAAAGAGTCTTTCGCCGGATTAGAAGCAGACACATGTACGTGGAAGGTAGGGGCAGTTGCCTGCCGCCTCAACGAATGACTTTATCACGTTGAGGACGCCTACACATTGTATGTACGGGTCCAGCTAATACATTTGAGGTGAGCTGTCGAGTGATCAACAGCAAGCACCCAAGGACCAACCCCAAGCAACACAATAAAGCATTGAGGGTTGAGAATTCATGACACTCAAACAGGCATGCTCCTCGGAATACCAAGGAGCGCAAGGTGCGTTCAAAGATTCGATGATTCACTGAATTCTGCAATTCACATTACTTATCGCATTTCGCTGCGTTCTTCA…	AY854976	SH188085.07FU	415	Fungi	p__Basidiomycota	c__Exobasidiomycetes	o__unidentified	f__unidentified	g__unidentified	s__Exobasidiomycetes_sp	6	295657 Exobasidiomycetes_sp	4.52415e-169	0.99	97.3494	0	0	0	0	0	0	0	0	0	0	0	0	0	0	0	0	0	0	0	0	0	0	0	0	0	0	0	0	0	0	0
>a82099	Otu02345	Unclassified	TTAAGTTCAGCGGGTAATCCTACCTGATTTGAGGCCAGAGCGTTAAGTTGGGTTGGAGTGCAGGCACTCCGCGCCGGGTTAGAAGCAGACTATTGATCGCATTGTAGCTTGGCCGGCCGTGAAGCCGTCCTCAACGAATGAACTTATCACGTTGAGTAGAACCAATGCATCGCAGATGCAGTCCAGCTAATACTTTTAAGGCAAGCCTGTCCGAAGACTGGCAAAGATGCCCATGGACCCGCCCCAAGCACGTCCTTTGGTGACAAAAGACATGGGGGTGGAGAATTCATGACACTCAAACAGGCATGCTCGTCGGAATACCAACGAGCGCAAGGTGCGTTCAAAGATTCGATGATTCACTGAATTCTGCAATTCACATTACTTATCGCATTTCGCTGC…	DQ835994	SH186666.07FU	423	Fungi	p__Basidiomycota	c__Exobasidiomycetes	o__unidentified	f__unidentified	g__unidentified	s__Exobasidiomycetes_sp	2	295037 Exobasidiomycetes_sp	1.17115e-156	1	88.4161	0	0	0	0	0	0	0	0	0	0	0	0	0	0	0	0	0	0	0	0	0	0	0	0	0	0	0	0	0	0	0
>a87113	Otu02120	Unclassified	TTAAGTTCAGCGGGTAGTCCTACCTGATTGGAGGCCAGATGTGATGAATTAGATTGGGTTAGAAAGCAAGCCAACTCGGTGCCAATGCCCGCTCGAACATGTTGCCTCAAGGCCCAGACTTCATCGAAGGAAAACCATAACGATGAAAAGGCCAAGATGCTATCCGAGCACATTGTTGTGCACATGAGCAGCCCACAAATCCATTTCAAGCGAGCCATTCTTGCGAAAGGCATTGCGCTCACATCCAACGATCAAACTCGCTTTCATTAAAAAAAACGGTTCGTGTTGAGGGATTCATGACACTCCAACAGGCATGCTCTTGGGAATACCCAAGAGCGCAAGGTGCGTTCAAAGATTCGATGATTCACTGAATTCTGCAATTCACATTACTTATCGCAT…	DQ234558	SH482410.07FU	431	Fungi	p__Basidiomycota	c__Exobasidiomycetes	o__Georgefischeriales	f__Tilletiariaceae	g__Tilletiaria	s__Tilletiaria_anomala	2	331193 Tilletiaria_anomala	3.31901e-156	0.99	88.6311	0	0	0	0	0	0	0	0	0	0	0	0	0	0	0	0	0	0	0	0	0	0	0	0	0	0	0	0	0	0	0
>a79191	Otu03442	AM	TTAAGTTCAGCGGGTATTCTTACTTGACTTGAGGTGTTGAAAGAAGAATTGTATCACATGACCCAATCAAAAAAAGGATTGGACAAATGACACGACGTAACGACAGGTAATCAATTGTTAATGAAACTCACGAGATGTAAGAGTATGACCATTTTCAATATCATACCAAAGATATCGTTAAGATAAATTTCAAGTTACCAAAATTGGAAAACTCAGATCCATTTTTAAAAAAACGAATTTATTGGAACAACCCTCAAACAAGCATACTCCTCGGAATACCAAGGAGTGCAATTTGCGTTCAAAGATTTGATGATTCACGGAATTCTGCAATTCACATTACTTATCGCATTTCGCTGCGTTCTTCATCGGTGACGAGTCTAG	KF206502	SH194638.07FU	381	Fungi	p__Glomeromycota	c__Glomeromycetes	o__Diversisporales	f__Acaulosporaceae	g__unidentified	s__Acaulosporaceae_sp	2	298717 Acaulosporaceae_sp	1.26826e-149	0.97	99.7375	2	0	0	0	0	0	0	0	0	0	0	0	0	0	0	0	0	0	0	0	0	0	0	0	0	0	0	0	0	0	0
>a40112	Otu02806	AM	TTAAGTTCAGCGGGTACTCTTACCTGATTTGAGGTCACGATTATATAAAAAGTTGTTCGATTTCTTCCTCTTTTTAAAAGGGAAAAATTGAACATGCCATTACACAAGACTTGATTAGTTGCGAACATTTAAAATTTAAAATAAACGCGTCTGTTACAAGCCAAGACATGACATTAATTTCGAGTGACCAATTACCATACGATGATATGATAACACGGAAAACTCATTATTCCAAGATTAAACTTGATTAATTTTCAAATGACCCTCAAACAGGCATACTCTTCGGAATACCAAAGAGTGCAATATGCGTTCAAAGATTCGATGATTCACGGAATTCTGCAATTCATACTACTTATCGCAATTCGCTGCGTTCTTCATCGGTGACGAGTCTAG	GQ388696	SH215193.07FU	393	Fungi	p__Glomeromycota	c__Glomeromycetes	o__Archaeosporales	f__Archaeosporaceae	g__unidentified	s__Archaeosporaceae_sp	5	307321 Archaeosporales_sp	3.53878e-145	0.95	99.7455	5	0	0	0	0	0	0	0	0	0	0	0	0	0	0	0	0	0	0	0	0	0	0	0	0	0	0	0	0	0	0
>a45260	Otu02523	AM	TTAAGTTCAGCGGGTAATCCTACCTGATTTGAGGTCACGATTATATATATAAATATTGTTTTATTTTCTCAACTTTCGTCAAAGAAATTGAACATGCCATATCAAGACTTGATTAGTTGCGAAGATTTAAACATAAACGCGTCTGTTACAAGCCAAGACGTTAGCATTTATTTCGAGTTACCATCCCACACACATCAAAGATTGATGAATGGAAAACTCATTATTCCAAGACTAATAGTAGCCAAGACTAATAGTCGAGATTAATTTTCAAATGACCCTCAAACAGGCATACTCTTCGGAATACCAAAGAGTGCAATATGCGTTCAAAGATTCGATGATTCACGGAATTCTGCAATTCACACTACTTATCGCAATTCGCCACGTTCTTCATCGATGACG…	AJ243419	SH026484.07FU	406	Fungi	p__Glomeromycota	c__Glomeromycetes	o__Archaeosporales	f__unidentified	g__unidentified	s__Archaeosporales_sp	6	324132 Archaeospora_trappei	1.70567e-111	0.87	97.5369	6	0	0	0	0	0	0	0	0	0	0	0	0	0	0	0	0	0	0	0	0	0	0	0	0	0	0	0	0	0	0
>a8961	Otu03037	AM	TTAAGTTCGGCGGGTAATCCTACCTGATTTGAGGTCACGATTATAAAGTAATTGTTCTACTCTTTTAACTTTCGTCAAAGAATTTGAACATGCCATACCAAGACTTGATTAGTTGCGAAGATTTAAACATAAACGCGTCTATTACAAGCCAAGACGTTAGCATTGATTTCGAGTTACCATCCACAAATCTCAGAGATCGTTGAATGGAAAACTCATTATTCCAAGACTAATAGTCTTGATTAATTTCAAATGACCCTCAAACAGGCATACTCTTCGGAATACCAAAGAGTGCAATATGCGTTCAAAGATTCGATGATTCACGGAATCCTGCAATTCACACTACTTATCGCAATTCGCTGCGTTCTTCATCGGTGACGAGTCTAG	AJ243419	SH026484.07FU	384	Fungi	p__Glomeromycota	c__Glomeromycetes	o__Archaeosporales	f__unidentified	g__unidentified	s__Archaeosporales_sp	4	324132 Archaeospora_trappei	2.27564e-124	0.91	97.3958	4	0	0	0	0	0	0	0	0	0	0	0	0	0	0	0	0	0	0	0	0	0	0	0	0	0	0	0	0	0	0
>d144194	Otu02697	AM	TTAAGTTCAGCGGGTATTCCTACCTGATTTGAGGTAATGTCAAAAATATTTGTATTGATCGCATACAACAATAAAGCGTATACGTCAAGACTTGGTAGCTCGTCACATCAAAGATTTTACGAAATAATATTATTACGCATCTCGACTAGATGAGACCAACCATCCATTTCAGGTTACAGCTAAAAATGCGGAATACCCATTTCCCTCGACTCGAAAGTCAAAGATTCTTTTTTATTACCCTCAAACAGGCATGCTCTCCGGAATACCAGAGAGCGCAATATGCGTTCAAAGATTCGATGATTCACAGAATTTGCAATTCACACTACTTATCGCAATTCGCTGCGTTCTTCATCGGTGACGAGTCTAG	JN581967	SH212835.07FU	367	Fungi	p__Glomeromycota	c__Glomeromycetes	o__Archaeosporales	f__unidentified	g__unidentified	s__Archaeosporales_sp	2	306290 Archaeosporales_sp	3.85343e-99	0.86	98.3651	0	0	0	0	0	0	0	0	0	0	0	0	0	0	0	0	0	0	0	0	0	0	0	0	0	0	0	0	0	0	0
>a49070	Otu00015	AM	TTAAGTTCAGCGGGTATTCTTGCCTGATTTGAGGTCATTGTTTAAATGTATCTTACAATCTCGACCAAGCACTTCTAAAAAAAAGTGCCTCGACGGCCAAAAAATCGTAATTGCTTGATGAATCCCAACCTAACGAGAGAATGTTTAATTGCTCCATTCGGTCGAATTTCATTAAACAAGCGGTAACATAAATTTAAGGCCATAAATCATTAAAATGAAATAAAAGCCCAATTCCACAATCAAAAGATTATGATAATTGTTATTTACTGACCCTCAAACAGGCATACTCCCCGGATTACCAGAGAGTGCAATATGCGTTCAAAGATTCGATGATTCACGTAATTCTGCAATTCACATTACTTATCGCAATTCGCTGCGTTCTTCATCGATGACGAGTCT…	GQ205097	SH208990.07FU	401	Fungi	p__Glomeromycota	c__Glomeromycetes	o__Glomerales	f__Claroideoglomeraceae	g__Claroideoglomus	s__Claroideoglomus_claroideum	63	304742 Claroideoglomus_claroideum	4.09081e-161	0.99	96.7581	7	0	0	3	0	0	0	0	0	0	0	0	0	0	0	0	0	0	0	0	0	0	0	0	0	0	0	0	0	0	0
>d35297	Otu00019	AM	TTAAGTTCAGCGGGTATTCTTGCCTGATTTGAGGTCATTTGTTAAAAAATTCACGATCTCAGCCAAGCACTTGTTAAAAAGTCCTTCGGCGGCCAAAAAATCGTAATTGCTTGATGAATCCGCCTAACGAGAGAATGTTTAATTGCTCCATTCGGTCGAATTTCATATTAAACAAGCGGTAACATAAATTTAAGGCCATGAATCATTAAAATGAAATAAAAGCCCAATTCCACAATCAAAAGATTATGATAATTGTTATTTACTGACCCTCAAACAGGCATACTCCCCGGATTACCAGAGAGTGCAATATGCGTTCAAAGATTCGATGATTCACGTAATTCTGCAATTCACATTACTTATCGCAATTCGCTGCGTTCTTCATCGTTGACGAGTCTAG	AY035657	SH208989.07FU	397	Fungi	p__Glomeromycota	c__Glomeromycetes	o__Glomerales	f__Claroideoglomeraceae	g__Claroideoglomus	s__Claroideoglomus_claroideum	43	304741 Glomerales_sp	1.45792e-161	0.99	98.4887	4	0	0	3	0	0	0	0	0	0	0	0	0	0	0	0	0	0	0	0	0	0	0	0	0	0	0	0	0	0	0
>d152919	Otu01544	AM	TTAAGTTCAGCGGGTATTCTTGCCTGATTTGAGGTCATTGTTTAAATGTATCTTACAATCTCGACCAAGCACTTCTAAAAAAAAGTGCCTCGACGGCCAAAAAATCGTAATTGCTTGATGAATCCCACCTAACGAGAGAATGTTTAATTGCTCCATTCGGTCGAACTTCATTAAACAAGCGGTAACATAAATTTAAGGCCATAAATCATTAAAATGAAATAAAAGCCCAATTCCACGATCAAAAGATTATGATAATTGTTATTTACTGACCCTCAAACAGGCATACTCCTCGGATTACCAGAGAGTGCAATATGCGTTCAAAGATTCGATGATTCACGTAATTCTGCAATTCACATTACTTATCGCAATTCGCTGCGTTCTTCATCGTTGACGAGTCTAG	GQ205097	SH208990.07FU	400	Fungi	p__Glomeromycota	c__Glomeromycetes	o__Glomerales	f__Claroideoglomeraceae	g__Claroideoglomus	s__Claroideoglomus_claroideum	10	304742 Claroideoglomus_claroideum	8.43929e-156	0.98	96.75	2	0	0	0	0	0	0	0	0	0	0	0	0	0	0	0	0	0	0	0	0	0	0	0	0	0	0	0	0	0	0
>c120926	Otu00038	AM	TTAAGTTCAGCGGGTATTCTTGCCTGATTTGAGGTCATTGTTAAATGTATCTTTTACAATCTCGACCAAGCACTTCTAAAAAAAAAGTGCCTCGACGGCCAAAAAATCGTAATTGCTTGATGAATCCGCCTAACGAGAGAATGTTTAATTGCTCCATTCGGTCGAATTTCATTTAAACAAGCGTAACATAAATTTAAGGCCATAAATCATTAAAATGAAATAAAAGCCCAATTCCATAATCAAGATTATGATAATTATTATTTACTGACCCTCAAACAGGCATACTCCCCGGATTACCAGAGAGTGCAATATGCGTTCAAAGATTCGATGATTCACGTAATTCTGCAATTCACATTACTTATCGCAATTCGCTGCGTTCTTCATCGATGACGAGTCTAG	FR750057	SH208991.07FU	399	Fungi	p__Glomeromycota	c__Glomeromycetes	o__Glomerales	f__Claroideoglomeraceae	g__Claroideoglomus	s__Claroideoglomus_sp	14	304743 Glomerales_sp	2.47952e-163	0.99	98.4962	0	0	0	0	0	0	0	0	0	0	0	0	0	0	0	0	0	0	0	0	0	0	0	0	0	0	0	0	0	0	0
>c30913	Otu01658	AM	TTAAGTTCAGCGGGTATTCTTGCCTGATTTGAGGTCATTATTAAATGTATCTTACAATCTCGACCAAGCACTTCTAAAAAAAAGTGACTCGACGGCCAAAAATCGTAATTGCTTGATGAATCCGCCTAACGAGAGAATGTTTAATTGCTCCATTCGGTCGAATTTCATATTAAACAAGCGTAACATAAATTTAAGGCCATAAATCATTAAAAATGAAATAAAAGCCCAATTCCACAATCAAAAGATTATGATAATTATTATTTACTGACCCTCAAACAGGCATACCCCCCGGATTACCAGAGAGTGCAATATGCGTTCAAAGATTCGATGATTCACGTAATTCTGCAATTCACATTACTTATCGCAATTCGCTGCGTTCTTCATCGGTGACGAG	FR750059	SH208992.07FU	394	Fungi	p__Glomeromycota	c__Glomeromycetes	o__Glomerales	f__Claroideoglomeraceae	g__Claroideoglomus	s__Claroideoglomus_sp	2	304744 Claroideoglomus_claroideum	1.44502e-161	0.99	99.7462	0	0	0	0	0	0	0	0	0	0	0	0	0	0	0	0	0	0	0	0	0	0	0	0	0	0	0	0	0	0	0
>c15303	Otu02029	AM	TTAAGTTCAGCGGGTATTCTTGCTTGAGCTGAGGTCATAAAAAAAATATATGCTCGTACAGACAAAAAAATAGAGTGCGCGCATAATATATGAAGATGGACAAGTTGTCAGCGAACCACACATAGCACGTTTTCAACTTGTACCAAGTAATAAATAATTTTAAAGTCACCAACATTTATTTATAATAATAAATACTGGAAAACTCAAATCCGCAAAAAATCACGAATGTTATTTTAATGACCCTCAACCAAGCATACTCCCCAGATTACTGGAGAGTACAATTTGCGTTCAAAGATTCGATGATTCACGGAATTCTGCAATTCACACTACGTATCGCATTTCGCCACGTTCTTCATCGATGACGAGTCTAG	AM713404	SH196919.07FU	371	Fungi	p__Glomeromycota	c__Glomeromycetes	o__Diversisporales	f__Diversisporaceae	g__Diversispora	s__Diversispora_sp	9	299809 Diversispora_celata	1.16225e-141	0.97	98.3827	0	0	0	0	0	0	0	0	0	0	2	0	0	0	0	0	0	0	2	0	0	0	0	0	0	0	0	0	0	0	0
>c149539	Otu02807	AM	TTAAGTTCAGCGGGTATTCTTACTTGACTTGAGGTGTTGAAAGAAAAATTGTATCACATGACCCAATCAAAAAGAATTAGACAAATGATACGACGTAACGACAGGCAATCAATTGTTAATGAAACTCACAAGATGTAAGAATATAACCATTTTCAATATCATACCAAAGATATCGTTAAGATAAATTTCAAGTTACCAAAATAATAAAATCTTGGAAAACTCAGATCCGTTTTTTAAAAAAACGAATTTATTGGAACAACCCTCAAACAAGCATACTCCTCGGAATACCAAGGAGTGCAATTTGCGTTCAAAGATTTGATGATTCACGGAATTCTGCAATTCACATTACTTATCGCATTTCGCTGCGTTCTCATCGGTGACGAGTCTAG	FM876788	SH194639.07FU	389	Fungi	p__Glomeromycota	c__Glomeromycetes	o__Diversisporales	f__unidentified	g__unidentified	s__Diversisporales_sp	5	298718 Acaulospora_cavernata	9.40677e-141	0.94	99.7429	0	0	0	0	0	0	0	0	0	0	0	0	0	0	0	0	0	0	0	0	0	0	0	0	0	0	0	0	0	0	0
>c105933	Otu02210	AM	TTAAGTTCAGCGGGTGTTCTTGCTTGAGCTGGGGTCATAAAAAAAAATATATGCTCGTACAGATAAAAAAAAAATCAAGTACGCGCATAATATATAAAGATGGACAAGTTGTCAGCGAACCACATATATAGCACGTTTTCAACTTTTACCAAGTAATAAATAATTTTAAAGTCACCAACATTTATATTATAACTGCTGGAAAACTCAAATCCGCAAAAAAAATCACGAATGTTATTTTAATGACCCTCAACCAAGCATACTCCCCAGATTACTGGAAAGTACAATTTGCGTTCAAAGATTCGATGATTCACGGAATTCTGCAATTCACACTACGTATCGCATTTCGCTGCGTTCTTCATCGATGACGAGTCTAG	JF439136	SH015016.07FU	374	Fungi	p__Glomeromycota	c__Glomeromycetes	o__Diversisporales	f__unidentified	g__unidentified	s__Diversisporales_sp	4	318381 Diversispora_sp	1.07127e-129	0.93	98.3957	0	0	0	0	0	0	0	0	0	0	0	0	0	0	0	0	0	0	0	0	0	0	0	0	0	0	0	0	0	0	0
>c158920	Otu02453	AM	TTAAGTTCAGCGGGTGTTCTTGCTTGAGCTGAGGTCATAAAAAAAAATATATGCTCGTACAGATAAAAAAAAATCAAGTGCGTGCATAATATATAAGGATGGACAAGTTGTCAGCGAACCGCAAATATAGCACGTTTTCAACTTGTACCAAGTTATAAATAATTTTAAAGTCACCAACATATATTTATAATAATAAATACTGGAAAACTCAAATCCGCAAAAAAATCACGAATGTTATTTTAATGACCCTCAACCAAGCATACTCCCCAGATTACTGGAAAGTACAATTTGCGTTCAAAGATTCGATGATTCACGGAATTCTGCAATTCACACTACGTATCGCATTTCGCTGCGTTCTTCATCGTTGACGAGTCTAG	AM713404	SH196919.07FU	377	Fungi	p__Glomeromycota	c__Glomeromycetes	o__Diversisporales	f__unidentified	g__unidentified	s__Diversisporales_sp	2	299809 Diversispora_celata	1.87572e-135	0.95	98.4085	0	0	0	0	0	0	0	0	0	0	0	0	0	0	0	0	0	0	0	0	0	0	0	0	0	0	0	0	0	0	0
>b46853	Otu00161	AM	TTAAGTTCAGCGGGTATTCTTACCTGATTTGAGATCAAAGTTGAGTATCGTATACGAATGATTCTGACGACGCCAGGTCAAACGTACTATATGAGATGATAAGTCATCACACGTTCTTAATCAACATTGATCTTAAATACGCTTTAATCATACCGGATGGATGAAATTTTAAGCCACTTTGACATGAATTAACATTTGAAAGATGGCTCAATTCTGACGCGATCACTCTTAAAAAAAGAGCGACGCCTCGATTTTTATTCTAACGACCCTCAAACAGGCATACTCCCCGGAATACCAGGGAGTACAAATTGCGTTTAAAGATTCGATGATTCACAAAATTATGCAATTCACACTACTTATCGCATTTCGCTGCGTTCTTCATCGGTGACGAGTCTAG	HF970285	SH184262.07FU	397	Fungi	p__Glomeromycota	c__Glomeromycetes	o__Glomerales	f__Glomeraceae	g__Funneliformis	s__Funneliformis_mosseae 160 gnl|BL_ORD_ID|293953 Funneliformis_mosseae|AY236333|SH184273.07FU|reps|k__Fungi	2	293942 Glomeraceae_sp	1.62889e-142	0.94	98.4887	0	0	0	0	0	0	0	0	0	0	0	0	0	0	0	0	0	0	0	0	0	0	0	0	0	0	0	0	0	0	0
>a76934	Otu00014	AM	TTAAGTTCAGCGGGTATTCTTACCTGATTTGAGGTCAAAAGTTTGAGTATCGTATACGAATGATCCTGACGACGCCAGGTCAGACGTACTACATGAGATGGTCCGTCATCGCGCGTTCTTAATCAAAATTGATCTTAAATACGCTTTAATCGTACCGGATGGATGAATTTTAAGCCACTTTGACATGAATTAACATTTGAAAGACGGCTCAATTCCGACGCGATCACCCTTAAAAAAAAGAGCGACGCCTCGATTTTTATTCTAACGACCCTCAAACAGGCATACTCCCCGGAATACCAGGGAGTGCAATTTGCGTTCAAAGATTCGATGATTCACAAAATTATGCAATTCACACTACTTATCGCATTTCGCTGCGTTCTTCATCGATGACGAGTCTAG	HF970285	SH184262.07FU	399	Fungi	p__Glomeromycota	c__Glomeromycetes	o__Glomerales	f__Glomeraceae	g__Funneliformis	s__Funneliformis_sp	48	293942 Glomeraceae_sp	1.12785e-160	0.98	98.4962	0	0	0	0	0	0	0	0	0	0	0	0	0	0	0	0	0	0	0	0	0	0	0	0	0	0	0	9	0	0	6
>a62963	Otu00017	AM	TTAAGTTCAGCGGGTATTCTTACCTGATTTGAGGTCAAAAGTTGAGTATCGTATACGAATGATCCTGACGACGCCAAGTCAAACGTACTACATGAGATGGTACGTCATCGCGCGTTCTTGAACAAAATTGATCTTAAATACGCTTTAATCGTACCGGATGGATGAATTTTAAGCCACTTTGACATGAATTAACATTTGAAAGACGGCTCAATTCCGACGCGATCACCCTTAAAAATAAAGAGCGACGCCTCGATTTTTTATTCTAACGACCCTCAAACAGGCATACTCCCCGGAATACCAGGGAGTGCAATTTGCGTTCAAAGATTCGATGATTCACAAAATTATGCAATTCACACTACTTATCGCATTTCGCTGCGTTCTTCATCGATGACGAGTCTAG	KF849508	SH184264.07FU	400	Fungi	p__Glomeromycota	c__Glomeromycetes	o__Glomerales	f__Glomeraceae	g__Funneliformis	s__Funneliformis_sp	39	293944 Funneliformis_sp	1.09735e-156	0.98	98.5	4	0	0	0	0	0	0	0	0	0	0	0	0	0	0	0	0	0	0	0	0	0	0	0	0	0	0	0	0	0	2
>a87742	Otu00024	AM	TTAAGTTCAGCGGGTATTCTTACCTGATTTGAGGTCAAAAGTTTGAGCATCGTATACGAATGAACCTGATGACCCAGGTCAAACGTACTACATGAGATGGTACGTCATCGCGCGTTCTTGAACAAAATTGATCTTAAATACGCTTTAATCGTACCGGATGGATGAATTTTAAGCCACTTTGACATGAATTAACATTTGAAAGACGGCTCAATTCCGACGCGATCACCCTTAAAAAAAAGAGCGACGCTTCGATTTTTTATTCTAACGACCCTCAAACAGGCATACTCCCCGGAATACCAGGGAGTGCAATTTGCGTTCAAAGATTCGATGATTCACAAAATTATGCAATTCACACTACTTATCGCATTTCGCTGCGTTCTTCATCGATGACGAGTCTAG	KF206541	SH184275.07FU	399	Fungi	p__Glomeromycota	c__Glomeromycetes	o__Glomerales	f__Glomeraceae	g__Funneliformis	s__Funneliformis_sp	30	293955 Glomeraceae_sp	1.12785e-160	0.98	98.4962	8	0	0	0	0	0	0	0	0	0	0	0	0	0	0	0	0	0	0	0	0	0	0	0	2	0	0	0	0	0	3
>a80962	Otu00022	AM	TTAAGTTCAGCGGGTATTCTTACCTGATTTGAGGTCAAAAGTTTTGAGTATCGTATACGAATGAACCTGATGACCCAGGTCAAACGTACTACATTAGATGGTACGTCATCGCGCGTTCTCGAACAAAATTGATCTTAAATACGCTTAATCGTACCGGATGGATGAATTTCAAGCCACTTTGACATGAATTAACATTTGAAAGACGGCTCAATTCCGACGCGATCACCCTTAAAAAAAGAGCGACGCCTCGATTTTTTATTCTAACGACCCTCAAACAGGCATACTCCCCGGAATACCAGGGAGTGCAATTTGCGTTCAAAGATTCGATGATTCACAAAATTATGCAATTCACACTACTTATCGCATTTCGCTGCGTTCTTCATCGTTGACGAGTCTAG	FN547484	SH204227.07FU	398	Fungi	p__Glomeromycota	c__Glomeromycetes	o__Glomerales	f__Glomeraceae	g__Funneliformis	s__Funneliformis_sp	23	302794 Funneliformis_mosseae	6.45237e-155	0.97	98.4925	5	0	0	4	0	0	0	0	0	0	0	0	0	0	0	0	0	0	0	0	0	0	0	0	0	0	0	0	0	0	0
>a122292	Otu00030	AM	TTAAGTTCAGCGGGTATTCTTACCTGATTTGAGGTCAAAAGTTGAGTATCGTATACGAATGATCCTGACGACGCCAAGTCAAACGTACTACATGAGATGGTACGTCATCGCGCGTTCTTGAACAAAATTGATCTTAAATACGCTTTAATCGTACCGGATGGATGAATTTTAAGCCACTTTGACATGAATTAACATTTGAAAGACGGCTCAATTCCGACGCGATCACCCTTAAAAAAAAGAGCGACGCCTCGATTTTTTATTCTAACGACCCTCAAACAGGCATACTCCCCGGAATACCAGGGAGTGCAATTTGCGTTCAAAGATTCGATGATTCACAAAATTATGCAATTCACACTACTTATCGCATTTCGCTGCGTTCTTCATCGGTGACGAGTCTAG	KF849508	SH184264.07FU	399	Fungi	p__Glomeromycota	c__Glomeromycetes	o__Glomerales	f__Glomeraceae	g__Funneliformis	s__Funneliformis_sp	20	293944 Funneliformis_sp	1.09414e-156	0.98	98.4962	9	0	0	0	0	0	0	0	0	0	0	0	0	0	0	0	0	0	0	0	0	0	0	0	2	0	0	0	0	0	0
>a117012	Otu00045	AM	TTAAGTTCAGCGGGTATTCTTACCTGATTTGAGGTCAAAAGTTTTGAGTATCGTATACGAATGAACCTGATGACCCAGGTCAAACGTACTACATTAGATGGTACGTCATCGCGCGTTCTCGAACAAAATTGATCTTAAATACGCTTAATCGTACCGGATGGATGAATTTCAAGCCACTTTGACATGAATTAACATTTGAAAGACGGCTCAATTCCGACGCGATCACCCTCAAAAAAAGAGCGACGCCTCGATTTTTTATTCTAACGACCCTCAAACAGGCATACTCCCCGGAATACCAGGGAGTGCAATTTGCGTTCAAAGATTCGATGATTCACAAAATTATGCAATTCACACTACTTATCGCATTTCGCTGCGTTCTTCATCGATGACGAGTCTAG	X96843	SH204226.07FU	398	Fungi	p__Glomeromycota	c__Glomeromycetes	o__Glomerales	f__Glomeraceae	g__Funneliformis	s__Funneliformis_sp	7	302793 Funneliformis_sp	3.02537e-156	0.98	98.4925	0	0	2	0	0	0	0	0	0	0	0	0	0	0	0	0	0	0	0	0	0	0	0	0	0	0	0	0	0	0	0
>a68908	Otu00118	AM	TTAAGTTCAGCGGGTATTCTTACCTGATTTGAGGTCAAAAGTTGAGTATAGTATACGAATGATCCTGACGACGCCAAGTCAAACGTACTACATGAGATGGTACGTCATCGCGCGTTCTTAATCAAAATTGATCTTAAATACGCTTTAATCGTACCGGATGGATGAATTTTAAGCCACTTTGACATGAATTAACATTTGAAAGACGGCTCAATTCCGACACGATCACCCTTAAAAAAAGGAGCGACGCCTCGATTTTTATTCTAACGACCCTCAAACAGGCATACTCCCCGGAATACCAGGGAGTGCAATTTGCGTTCAAAGATTCGATGATTCACAAAATTATGCAATTCACACTACTTATCGCATTTCGCTGCGTTCTTCATCGGTGACGAGTCTAG	HF970285	SH184262.07FU	398	Fungi	p__Glomeromycota	c__Glomeromycetes	o__Glomerales	f__Glomeraceae	g__Funneliformis	s__Funneliformis_sp	4	293942 Glomeraceae_sp	3.02537e-156	0.97	98.4925	0	0	0	0	0	0	0	0	0	0	0	0	0	0	0	0	0	0	0	0	0	0	0	0	2	0	0	0	0	0	0
>a27624	Otu00098	AM	TTAAGTTCAGCGGGTATTCTTACCTGATTTGAGGTCAAAAGTTGAGTATCGTATACGAATGATCCTGACGACGCCAAGTCAAACGTACTACATGAGATGGTACGTCATCGCGCGTTCTTGAACAAAATTGTTCTTAAATACGCTTTAATCGTACCGGATGGATGAATTTTAAGCCACTTTGACATGAATTAACATTTGAAAGACGGCTCAATTCCGACGCGATCACCCTTAAAAAAAAGAGCGACGATTCGATTTTTTATTCTAACGACCCTCAAACAGGCATACTCCCCGGAATACCAGGGAGTGCAATTTGCGTTCAAAGATTCGATGATTCACAAAATTATGCAATTCACACTACTTATCGCATTTCGCTGCGTTCTTCATCGATGACGAGTCTAG	KF849508	SH184264.07FU	399	Fungi	p__Glomeromycota	c__Glomeromycetes	o__Glomerales	f__Glomeraceae	g__Funneliformis	s__Funneliformis_sp	2	293944 Funneliformis_sp	6.47135e-155	0.97	98.4962	0	0	0	0	0	0	0	0	0	0	0	0	0	0	0	0	0	0	0	0	0	0	0	0	2	0	0	0	0	0	0
>b6086	Otu00119	AM	TTAAGTTCAGCGGTATTCTTACCTGATTTGAGGTCAAAAGTTGAGTATCGTATACGAATGATCCTGACGACGCCAGGTCAAATGTACTACATGAGATGGTACGTCATCACGTGTTCTTAATCAACATTGATCTTAAATACGCTTTAATCGTACTGGATGAATGAAATTTTAAGCCACTTTGACATGAATTAACATTTGAAAGACAGCTCAATTCTGACGCGATCACCCTTAAAAAAAGAGCGGCGCCTCGATTTTTATTCTAACGACCCTCAAACAGGCATACTTCCTGGAATACCAGGGAGTGCAATTTGTGTTCAAAGATTCGATGATTCACAAAATTATTCAATTCACACTACTTATCGCATTTCGCTGCGTTCTTCATCGTTGACGAGTCTAG	DQ400146	SH184268.07FU	397	Fungi	p__Glomeromycota	c__Glomeromycetes	o__Glomerales	f__Glomeraceae	g__Funneliformis	s__Funneliformis_sp	2	293948 Funneliformis_mosseae	2.11802e-143	0.94	98.4887	0	0	0	0	0	0	0	0	0	0	0	0	0	0	0	0	0	0	0	0	0	0	0	0	0	0	0	0	0	0	0
>b135401	Otu00261	AM	TTAAGTTCAGCGGGTATTCTTACCTGATTTGAGGTCAAAAGTTTGAGTATCGTATACGAATGAACCTGATGACCCAGGTCAAACGTACTACATGAAATGGTACGTCATCGCGCGTTCTTGAACAAAATTGATCTTAAATACGCTTAATCGTACCGGATGGATGAATTTCAAGCCACTTTGACATGAATTAACATTTGAAAGACGGCTCAATTCCGACGCGATCACCCTTAAAAAAAAGAGCGACGCCTCGATTTTTTATTCTAACGACCCTCAAACAGGCATACTCCCCGGAATACCAGGGAGTGCAATTTGCGTTCAAAGATTCGATGATTCACAAAATTATGCAATTCACACTACTTATCGCATTTCGCTGCGTTCTTCATCTTTGACGAGTCTAG	FN547484	SH204227.07FU	398	Fungi	p__Glomeromycota	c__Glomeromycetes	o__Glomerales	f__Glomeraceae	g__Funneliformis	s__Funneliformis_sp	2	302794 Funneliformis_mosseae	5.11513e-158	0.98	98.4925	0	0	0	0	0	0	0	0	0	0	0	0	0	0	0	0	0	0	0	0	0	0	0	0	0	0	0	0	0	0	0
>c153901	Otu00263	AM	TTAAGTTCAGCGGGTATTCTTACCTGATTTGAGGTCAAAAGTTGAGTATAGTATACGAATGATCCTGACGACGCCAGGTCAAACGTACTACATGAGATGGTACGTCATCGCGCGTTCTTAATCAAAATTGATCTTAAATACGCTTTAATCGTACCGGATGGATGAATTTTAAGCCACTTGGCATGAATTAACATTTGAAGGACGGCTCAATTCCGACACGATCACCCTTAAAAAAAAGAGCGACGCCTCGATTTTTATTCTAACGACCCTCAAACAGGCATACTCCCCGGAATACCAGGGAGTGCAATTTGCGTTCAAAGATTCGATGATTCACAAAATTATGCAATTCACACTACTTATCGCATTTCGCTGCGTTCTTCATCGATGACGAGTCTAG	HF970285	SH184262.07FU	397	Fungi	p__Glomeromycota	c__Glomeromycetes	o__Glomerales	f__Glomeraceae	g__Funneliformis	s__Funneliformis_sp	2	293942 Glomeraceae_sp	2.31985e-155	0.97	98.4887	0	0	0	0	0	0	0	0	0	0	0	0	0	0	0	0	0	0	0	0	0	0	0	0	0	0	0	0	0	0	0
>d176184	Otu01475	AM	TTAAGTTCAGCGGGTATTCTTACCTGATTTGAGGTCAAAAGTTGAGTATCGTATACGAATGATCCTGACGACGCCAAGTAAACGTACTACATGAGATGGTACGTCATCGCGCGTTCTTAATCAAAATTGATCTTAAATACGCTTTAATCGTACCGGATGGATGAATTTTAAGCCACTTTGACATGAATTAACATTTGAAAGACGGCTCAATTCCGACACGATCACCCTTAAAAAAAAGAGCGACGCCTCGATTTTTATTCTAACGACCCTCAAACAGGGATACTCCCCGGAATACCAGGGAATGCAATTTGCGTTCAAAGATTCGATGACTCACAAAATTATGCAATTCACACTACTTCTCGCATTTCGCTGCGTTCTTCATCGTTGACGAGTCTAG	HF970285	SH184262.07FU	397	Fungi	p__Glomeromycota	c__Glomeromycetes	o__Glomerales	f__Glomeraceae	g__Funneliformis	s__Funneliformis_sp	2	293942 Glomeraceae_sp	1.05522e-152	0.97	98.4887	0	0	0	0	0	0	0	0	0	0	0	0	0	0	0	0	0	0	0	0	0	0	0	0	0	0	0	2	0	0	0
>a130549	Otu01394	AM	TTAAGTTCAGCGGGTGTTCCTACCTGATTTGAGGTCAAATCATGAAAAATTTATAGACACGGAACCACACGATATGGTCGCATCTAATAGATTTTGGCATTAAGATAAACGAATAAAAAAAAATTTATGTACGTCTAAAATGCACAAAAAAGGTCAATTTTAAGCCTCTTAAACCCAGAAGATAAGATAACTCAAACTCCGGAACATCACAAAAATTGCAACGCACCGATTTTTATTAACACTGACCCTCAAACAGGCATACTCCCCGGGTTACCAAAGAGTGCAATTTGCGTTCAAAAATTTGATGATTCACGGAATTCTGCAATTCACATTACTTATCGCACTTCGCTGCGTTCTTCATCGTTGACGAGTCTAG	HF968913	SH175527.07FU	376	Fungi	p__Glomeromycota	c__Glomeromycetes	o__Glomerales	f__Glomeraceae	g__unidentified	s__Glomeraceae_sp	156	290163 Glomeraceae_sp	4.36792e-146	0.97	98.4043	8	2	5	0	0	0	0	0	0	0	0	0	5	0	0	4	0	0	0	0	0	3	0	0	0	0	0	2	0	0	3
>c73492	Otu00034	AM	TTAAGTTCAGCGGGTACTCTTACCTGATTTGAGGTCATTTTGATGAGAAATCATAGGCGCGAATCATGAGAATGACCACACCTAATGTTCGATTATCACAAACGTACGTAAATAATTTAAATACGTTCGAAAAATCATGCAAAATTTTAGGTCACTTAACCGAAGGTAAGAACAACCCAAATCCGATGCGTCACCACGCAAGGCAGCAACAACACCGATTTTTATTTAACTGACCCTCAAACAGGCATACTCTCCGGAATACCAGAGAGTGCAATTTGCGTTCAAAGATTCGATGATTCACGGAATTCTGCAATTCACATTACTTATCGCACTTCGCTGCGTTCTTCATCGTTGACGAGTCTAG	AJ567749	SH176108.07FU	364	Fungi	p__Glomeromycota	c__Glomeromycetes	o__Glomerales	f__Glomeraceae	g__unidentified	s__Glomeraceae_sp	14	290411 Glomeraceae_sp	5.16882e-139	0.97	98.3516	0	0	0	0	0	0	0	0	0	0	0	0	0	0	0	0	0	0	0	0	0	0	0	0	0	0	0	0	0	0	0
>b74882	Otu01864	AM	TTAAGTTCAGCGGGTGTTCCTACCTGATTTGAGGTCAAATCATGAAAAATTTATAGACACGGAACCACAAGATATGGTCGCATCTAATAGATTTTGGCATTAGGATGGACGAATAAAGGAAATTTATGTACGTCTAAAATGCACAAAAAAGGTCAATTTTAAGCCTCTTAGAACCAAGTTAAGATAACTCAAACTCCAGAACGTCACAAAAAATTGCAACGCACCGATTTTTATTAACACTGACCCTCAAACAGGCATACTCCCCGGGTTGCCAGAGAGTGCAATTTGCGTTCAAAGATTCGATGATTCACGGAATTTTGCAATTCACATTACTTATCGCACTTCGCCACGTTCTTCATCGATGACGAGTCTAG	AJ567736	SH175605.07FU	374	Fungi	p__Glomeromycota	c__Glomeromycetes	o__Glomerales	f__Glomeraceae	g__unidentified	s__Glomeraceae_sp	9	290241 Rhizophagus_sp	1.62115e-150	0.99	98.3957	0	0	0	0	0	0	0	0	0	0	0	0	0	0	0	0	0	0	0	0	0	0	0	0	0	0	0	0	0	0	0
>c140395	Otu02553	AM	TTAAGTTCAGCGGGTGTTCCTACCTGATTTGAGGTCAAATCATGAAAAATTTATAGACACGAAACCACATGATATGGTCGCATCTAATAGATTTTGGCATTAAGATAGACGAATAAAAAAAAATTTATGTACGTCCAAAATGCACAAAAAAGGTCAATTTTAAGCCTCTTAAACCCAAAAGATAAGATAACTCAAACTCCGGAACATCACAAAAATTGCAACGCACCGATTTTTATTAACACTGACCCTCAAACAGGCATACTCCCCGGGTTACCAGAGAGTGCAATTTGCGTTCAAAGATTCGATGATTCACGGAATTCTGCAATTCACATTACTTATCGCACTTCGCTGCGTTCTTCATCGTTGACGAGTCTAG	HF968913	SH175527.07FU	376	Fungi	p__Glomeromycota	c__Glomeromycetes	o__Glomerales	f__Glomeraceae	g__unidentified	s__Glomeraceae_sp	5	290163 Glomeraceae_sp	2.58343e-144	0.97	98.4043	0	0	0	0	0	0	0	0	0	0	0	0	0	0	0	0	0	0	0	0	0	0	0	0	0	0	0	0	0	0	0
>b41267	Otu02686	AM	TTAAGTTCAGCGGGTGTCCTTACCTGATTTGAGGTCAAAAGATGAGAATTATGGGCACGAGATCATATAAAACATGATCGCACCTAATAAGTAATTTGACACCAGAATAGACGATAAAAAAATTTATGTACGTCTAAAAAGTGCGCAAAAAATGTTCAATTTTAAGCCACTTAAACCCGAAAGTCAAAGGTAGCCCAAACTCCGTTGTGTCACAAAAGAGCAACACCCCGATTTTATTATTACTGACCCTCAAACAGGCATACTCTCCGAAGAGAGTGCAATTTGCGTTCAAAAATTCGATGATTCACGGAATTCTGCAATTCACATTACTTATCGCACTTCGCTGCGTTCTTCATCGGTGACGAGTCTAG	AJ567729	SH175627.07FU	371	Fungi	p__Glomeromycota	c__Glomeromycetes	o__Glomerales	f__Glomeraceae	g__unidentified	s__Glomeraceae_sp	4	290263 Glomeraceae_sp	1.55782e-146	0.98	98.3827	0	0	0	0	0	0	0	0	0	0	0	0	0	0	0	0	0	0	0	0	0	0	0	0	0	0	0	0	0	0	0
>a80733	Otu00259	AM	TTAAGTTCAGCGGGTATTCTTACCTGATTTGAGGTCAAAAGTTTGAGCATCGTATACGAATGAACCTGACGACCCAGGTCAAACGTACTACATGAGATGGTACGTCATCGCGCGTTCTTGAACAAAATTGATCTTAAATACGCTTTAATCGTACCGGATGGATGAATTTTAAGCCACGTTGACATGAATTAACATTTGAAAGACGGCTCAATTCCGACGCGATCACCCTTAAAAAAAAGAGCGACGCTTCGATTTTTTAGTCTAACGACCCTCAAACAGGCATACTCCCCGGAATACCAGGGAGTGCAATTTGCGTTCAAAGATTCGATGATTCACAAAATTATGCAATTCACACTACTTATCGCATTTCGCTGCGTTCTTCATCGTTGACGGTCTAG	KF206541	SH184275.07FU	398	Fungi	p__Glomeromycota	c__Glomeromycetes	o__Glomerales	f__Glomeraceae	g__unidentified	s__Glomeraceae_sp	2	293955 Glomeraceae_sp	1.09093e-156	0.98	97.4874	2	0	0	0	0	0	0	0	0	0	0	0	0	0	0	0	0	0	0	0	0	0	0	0	0	0	0	0	0	0	0
>c32335	Otu01564	AM	TTAAGTTCAGCGGGTATTCTTACCTGATTTGAGGTCAAAAGTTGAATGTCGTATACGAATGAGCCTGACAAGCAGGTCGAACGTACTACATGAGATGGTACGTCATCGCGCGTTCTTAATCAAGGTTGATCTTAAATACGCTTTAAATCGTACCAGATTGATGAATTTTAAGCCACTTTGACATGAATTAACATATGAAAGAAGGCTCAATTCCGACGCAATCACCCAAACAAAATATAATAATTTCGTAAAGAGCGACGCTTCGATTTTTGTTCTAACGACCCTCAAACAGGCATACTCCCCGGAACACCAGAGAGTGCAATTTGCGTTCAAAGATTCGATGATTCACAATTTCTGCAATTCACACTACTTATCGCATTTCGCTGCGTTCTTCATCGA…	FN547496	SH083145.07FU	411	Fungi	p__Glomeromycota	c__Glomeromycetes	o__Glomerales	f__Glomeraceae	g__unidentified	s__Glomeraceae_sp	2	311110 Funneliformis_caledonium	2.49007e-159	0.97	98.5401	0	0	0	0	0	0	0	0	0	0	0	0	0	0	0	0	0	0	0	0	0	0	0	0	0	0	0	0	0	0	0
>d76564	Otu02301	AM	TTAAGTTCAGCGGGTGTTCCTACCTGATTTGAGGTCAAATCATGAAAAATTTATAGACACGGAACCACTTGATATGGTCGCACCTAATAGATTTGGCATTAAGATAAACGAATAAAAAAAATTTATGTACGTCTAAAATGCACAAAAAGGTCAATTTTAAGCCTCTTAAACCCGGAAGATAAGATAACTCAAACTCCGGAACATCACAAAATTGCAACGCACAGATTTTTATTAACACTGACCCTCAAACAGGCATACTCCCCGGGTTGCCAGAGAGTGCAATTTGCGTTCAAAGATTCGATGATTCACGGAATTCTGCAATTCACATTACTTATCGCACTTCGCTACGTTCTTCATCGATGACGAGTCTAG	AM992812	SH175623.07FU	372	Fungi	p__Glomeromycota	c__Glomeromycetes	o__Glomerales	f__Glomeraceae	g__unidentified	s__Glomeraceae_sp	2	290259 Glomeraceae_sp	1.97133e-143	0.97	98.3871	0	0	0	0	0	0	0	0	0	0	0	0	0	0	0	0	0	0	0	0	0	0	0	0	0	0	0	0	0	0	0
>d173292	Otu04085	AM	TTAAGTTCAGCGGGTGTTCCTACCTGATTTGAGGTCAAATCATGAAAAAATTTATAGACACGGAACCACACGATAAGGTCGCATCTAATAGATTTTGGCATTAGAATAAACGAAATAAAAAAATTTATATACGTCTAAAATGCGCAAAAATGATGTCAATTTTAAGCCTCTTAAAAACACCTCAAAAGGTATCGTTATAAGATAACCCAAACTCCGGAGCATCACAAAAAAGCAACACGCCGATTTTTATTAATACTGACCCTCAAACAGGCATACTCTCCGAAGAGAGTGCAATTTGCGTTCAAAGATTCGATGATTCACGGAATTCTGCAATTCACATTACTTATCGTACTTCGCTACGTTCTTCATCGATGACGAGTCTAG	JF439101	SH175575.07FU	384	Fungi	p__Glomeromycota	c__Glomeromycetes	o__Glomerales	f__Glomeraceae	g__unidentified	s__Glomeraceae_sp	2	290211 Rhizophagus_intraradices	6.0018e-151	0.98	98.4375	0	0	0	0	0	0	0	0	0	0	0	0	0	0	0	0	0	0	0	0	0	0	0	0	0	0	0	0	0	0	0
>a30320	Otu01518	AM	TTAAGTTCAGCGGGTGTTCTTACCTGATTTGAGGTCAAATCATGAAAAATTTATGGACACGGAACCACACGATATGGTCGCATCTAATAGATTTGGCATTAAGATAGACGAATAAAAAAAAATTTATGTACGTCTAAAAATGCACAAAAAAGGTCAATTTTAAGCCTCTTAAAAAATACCCTGAAAAAGGGTGTTGTTATAAGATGACCCAAACTCCGGAACGTCACAAAAGAGCAACACGCCGATTTTTATTAATACTGACCCTCAAACAGGCATACTCTCCGAAGAGAGTGCAATTTGCGTTCAAAGATTCGATGATTCACGGAATTCTGCAATTCACACTACTTATCGCACTTCGCCACGTTCTTCATCGATGACGAGTCTAG	FR732077	SH014983.07FU	386	Fungi	p__Glomeromycota	c__Glomeromycetes	o__Glomerales	f__unidentified	g__unidentified	s__Glomerales_sp	76	318368 uncultured_Glomus	5.85816e-147	0.97	98.4456	5	0	0	2	0	0	2	0	0	0	0	0	2	0	0	0	0	0	0	0	0	2	0	0	0	0	0	0	2	0	0
>a144396	Otu00012	AM	TTAAGTTCAGCGGGTATTCTTGCCTGATTTGAGGTCATTGTTAAATGTATCTTACAATCTTGACCAAGCACTTTTAAAAAAAGTGCTTCGACGGCCAAAAAATCGTAATTGCTTGATGAATCCGCCTAACGAGAGAATGTTTAATTGCTCCATTCGGTCGAATTTCATATTAAACAAGCGGTAACATAAATTTAAGGCCATAAATCATTAAAAATGAAATAAAGGCCCAATTCCACAATCAAAAGATTATGATAATTATTATTTACTGACCCTCAAACAGGCATACTCCCCGGAATACCAGAGAGTGCAATATGCGTTCAAAGATTCGATGATTCACGTAATTCTGCAATTCACATTACTTATCGCAATTCGCTGCGTTCTTCATCGTTGACGAGTCTAG	JQ218224	SH023628.07FU	400	Fungi	p__Glomeromycota	c__Glomeromycetes	o__Glomerales	f__unidentified	g__unidentified	s__Glomerales_sp	57	322727 uncultured_Glomus	2.95222e-152	0.96	98.5	5	0	0	4	0	0	0	0	0	0	0	0	0	0	0	0	0	0	0	0	0	0	0	0	0	0	0	0	0	0	0
>c57591	Otu00018	AM	TTAAGTTCAGCGGGTATTCTTGCCTGATTTGAGGTCATTGTTAAATGTATCTTACAATCTCGACCAAGCACTTCTAAAAAAAAGTGACTCGACGGCCAAAAATCGTAATTGCTTGATGAATCCGCCTAACGAGAGAATGTTTAATTGCTCCATTCGGTCGAATTTCATATTAAACAAGCGTAACATAAATTTAAGGCCATAAATCATTAAAAATGAAATAAAAGCCCAATTCCACAATCAAAAGATTATGATAATTATTATTTACTGACCCTCAAACAGGCATACTCCCCGGATTACCAGAGAGTGCAATATGCGTTCAAAGATTCGATGATTCACGTAATTCTGCAATTCACATTACTTATCGCAATTCGCCACGTTCTTCATCGATGACGAGTCTAG	FR750059	SH208992.07FU	399	Fungi	p__Glomeromycota	c__Glomeromycetes	o__Glomerales	f__unidentified	g__unidentified	s__Glomerales_sp	31	304744 Claroideoglomus_claroideum	1.12785e-160	0.98	98.4962	3	0	0	0	0	0	0	0	0	0	0	0	0	0	0	0	0	0	0	0	0	0	0	0	0	0	0	0	0	0	0
>a81079	Otu01899	AM	TTAAGTTCAGCGGGTGTTCTTACCTGATTTGAGGTCAAATCATGAAAAATTTATAGACACGGAACCACATGATATGGTCGCATCTAATAGATTTTGGCATTAGAATAAACAAATAAAAAAAATTTATGTACGTCTAAAAATGCGCAAAAAAGGTCAATTTTAAGCCTCTTAAAAATACCCTGAAAAAGGGTGTTGTTATAAGATGACCCAAACTCCGGAACGTCACAAAAGAGCAACACGCCGATTTTTATTAATACTGACCCTCAAACAGGCATACTCTCCGAAGAGAGTGCAATTTGCGTTCAAAGATTCGATGATTCACGGAATTCTGCAATTCACACTACTTATCGCACTTCGCCACGTTCTTCATCGATGACGAGTCTAG	FR732077	SH014983.07FU	385	Fungi	p__Glomeromycota	c__Glomeromycetes	o__Glomerales	f__Glomeraceae	g__unidentified	s__Glomerales_sp	18	318368 uncultured_Glomus	5.66576e-143	0.96	98.4416	3	0	0	2	0	0	0	0	0	0	0	0	0	0	0	0	0	0	0	0	0	0	0	0	0	0	0	0	0	0	0
>d140997	Otu00042	AM	TTAAGTTCAGCGGGTATTCTTACCTGATTTGAGGTCAAAAGTTGAGTATCGTATACGAATGATCCTGACGACGCCAGGTCAAACGTACTACATGAGATGGTATGTCATCGCGCGTTCTTAATCAACATTGATCTTAAATACGCTTTAATCGTACCGGATGGATGAATTTTAAGCCACTTTGACATGGAAAGACGGCTCAATTCCGACGCGATCACCCTTAAAAAAAAGAGCGACGCCTCGATTTTTATTCTAACGACCCTCAAACAGGCATACTCCCCGGAATACCAGGGAGTGCAATTTGCGTTCAAAGATTCGATGATTCACAAAATTATGCAATTCACACTACTTATCGCATTTCGCTGCGTTCTTCATCGTTGACGAGTCTAG	HF970285	SH184262.07FU	387	Fungi	p__Glomeromycota	c__Glomeromycetes	o__Glomerales	f__unidentified	g__unidentified	s__Glomerales_sp	15	293942 Glomeraceae_sp	5.70041e-143	0.95	98.4496	0	0	0	0	0	0	0	0	0	0	0	0	0	0	0	0	0	0	0	0	0	0	0	0	0	0	0	0	0	0	0
>a41064	Otu00040	AM	TTAAGTTCAGCGGGTATTCTTGCCTGATTTGAGGTCATTGTTAAATGTATCTTACAATCTCGACCAAGCACTTCTAAAAAAAGTGCCTCGACGGCCAAAAATCGTAATTTGCTTGATGAATCCGCCTAACGAGAGAATGTTTAATTGCTCCATTCGGTCGAATTTCATATTAAACAAGCGGTAACATAAATTTGAGGCCATAAATCATTAAAAATGAAATAAAAGCCCAATTCCACAATCAAAAGATTATGATAATTATTATTTACTGACCCTCAAACAGGCATACTCCCCGGATTACCAGAGAGTGCAATATGCGTTCAAAGATTCGATGATTCACGTAATTCTGCAATTCACATTACTTATCGCAATTCGCTGCGTTCTTCATCGATGACGAGTCTAG	FR750059	SH208992.07FU	400	Fungi	p__Glomeromycota	c__Glomeromycetes	o__Glomerales	f__unidentified	g__unidentified	s__Glomerales_sp	13	304744 Claroideoglomus_claroideum	3.04317e-156	0.98	98.5	0	0	0	0	0	0	0	0	0	0	0	0	0	0	0	0	0	0	0	0	0	0	0	0	0	0	0	0	0	0	0
>a72259	Otu00050	AM	TTAAGTTCAGCGGGTATTCTTACCTGATTTGAGGTCAAAAGTTGAGTGTCGTATACGAATGAGCCTGACAAGCAGGTCGAACGTACTACATGAGATGATACGTCATCACGCGTTCTTAATCAAGACTGATCTTAAATACGCTTTAAACCGTACCAGATTGATGAATTTTAAGCCACTTTGACATGAATTAACATATGAAAGACGGTTCAATTCCGACGCGATCAACCAAACAAAATATAATAATATTTCGTAAAGAGCAACGGCTTCGATTTTTGTTCTAACGACCCTCAAACAGGCATACTCCCCGGAATACCAGAGAGTGCAATTTGCGTTCAAAGATTCGATGATGCACAATTTCTGCAATTCACACTACTTATCGCATTTCTCTGCGTTCTTCAT…	FN547496	SH083145.07FU	414	Fungi	p__Glomeromycota	c__Glomeromycetes	o__Glomerales	f__Glomeraceae	g__unidentified	s__Glomerales_sp	11	311110 Funneliformis_caledonium	1.93129e-158	0.96	98.5507	0	0	0	0	0	0	0	0	0	0	0	0	0	0	0	0	0	0	0	0	0	0	0	0	0	0	0	0	0	0	0
>d66993	Otu01684	AM	TTAAGTTCAGCGGGTATTCTTGCCTGATTTGAGGTCATTTGTTAAAAAATTCACGATCTCAGCCAAGCACTTGTTAAAAAGTCCTTCGGCGGCCAAAAAATCGTAATTGCTTGATGAATCCGCCTAACGAGAGAATGTTTAATTGCTCCATTCGGTCGAATTTCATATTAAACAAGCGGTAACATAAATTTAAGGCCATGAATCATTAAAATGAAATAAAAGCCCAATTCCACAATCAAAAGATTATGATAATTGTTATTTACTGACGCTCAGACAGGCATGCCCGCCAGAATACTGGCGGGCGCAATGTGCGTTCAAAGATTCGATGATTCACTGAATTCTGCAATTCACATTACTTTTCGCATTTCGCTACGTTCTTCATCGATGACGAGTCTAG	AY035657	SH208989.07FU	397	Fungi	p__Glomeromycota	c__Glomeromycetes	o__Glomerales	f__unidentified	g__unidentified	s__Glomerales_sp	6	304741 Glomerales_sp	1.67906e-146	0.95	98.4887	0	0	0	0	0	0	0	0	0	0	0	0	0	0	0	0	0	0	0	0	0	0	0	0	0	0	0	0	0	0	0
>c165847	Otu00086	AM	TTAAGTTCAGCGGGTACTCTTACCTGATTTGAGGTCATTTTTAAAATATGTTTATGATTTTTTGATATTATTAAAACACCAAAATAATCATATTTGACTTAATAAAACATCACTAAATGAGATAAATTATAAATAATTGCTCATTTTGGTTCAGTTTATATAGCCATATATAACATAAAATTTAAGATCATCAAAAATAATGAAAAATCTTTGAAAAGATCCAATTCCATGATTCCAATTTAATAAATAAATTAAAAAAAGGATTTCATGATAGATTTTTTATTTTTACTGACCCTCAAACAGGCATACTCCCCGGATTACCAGAGAGTGCAATATGCGTTCAAAGATTCGATGATTCACGTAATTCTGCAATTCACATTACTTATCGCAATTCGCTGC…	HF970339	SH206039.07FU	423	Fungi	p__Glomeromycota	c__Glomeromycetes	o__Glomerales	f__unidentified	g__unidentified	s__Glomerales_sp	5	303500 Claroideoglomeraceae_sp	2.1462e-135	0.92	98.5816	0	0	0	0	0	0	0	0	0	0	0	0	0	0	0	0	0	0	0	0	0	0	0	0	0	0	0	0	0	0	0
>c117069	Otu00044	AM	TTAAGTTCAGCGGGTATTCTTACCTGATTTGAGGTCAAAAGTTGAGTGTCGTATACGAATGAGCCTGACAAGCAGGTCGAACGTACTACATGAGATGATACGTCATCGCGCGTTCTTAATCAAGACTGATCTTAAATACGCTTTAAATCGTACCAGATTGATGAATTTTAAGCCACTTTGACATGAATTAACATATGAAAGACGGTTCAATTCCGACGCGATCACCCAAACAAAATATAATAATATTTCGTAAAGAGCAACGGCTTCGATTTTTGTTCTAACGACCCTCAAACAGGCATACTCCCCGGAATACCAGAGAGTGCAATTTGCGTTCAAAGATTCGATGATTCACAATTTCTGCAATTCACACTACTTATCGCATTTCGCTGCGTTCTTCAT…	FN547496	SH083145.07FU	414	Fungi	p__Glomeromycota	c__Glomeromycetes	o__Glomerales	f__Glomeraceae	g__unidentified	s__Glomerales_sp	4	311110 Funneliformis_caledonium	4.24586e-161	0.97	98.5507	0	0	0	0	0	0	0	0	0	0	0	0	0	0	0	0	0	0	0	0	0	0	0	0	0	0	0	0	0	0	0
>c5321	Otu00087	AM	TTAAGTTCAGCGGGTACTCTTACCTGATTTGAGGTCATTTTTAAAATATGTTTATGATTTTTTGATATTATTAAAAACACCAAAATAATCATATTTGACTTAATAAAACATCACTAAATGAGATAAATTATAAATAATTGCTCATTTTGGTTCAGTTTATATATAGCCATATATAACATAAAATTTAAGATCATCAAAAATAATGAAATCTTTGAAAAGATCCAATTCCATGATCCGATTTATAAAAAAAGGATTCATGATAGATTTTTTATTTTTACTGACCCTCAAACAGGCATACTCCCCGGATTACCAGAGAGTGCAATATGCGTTCAAAGATTCGATGATTCACGTAATTCTGCAATTCACATTACTTATCGCAATTCGCTGCGTTCTTCATCG…	HF970339	SH206039.07FU	412	Fungi	p__Glomeromycota	c__Glomeromycetes	o__Glomerales	f__unidentified	g__unidentified	s__Glomerales_sp	3	303500 Claroideoglomeraceae_sp	1.34844e-145	0.95	98.5437	0	0	0	0	0	0	0	0	0	0	0	0	0	0	0	0	0	0	0	0	0	0	0	0	0	0	0	0	0	0	0
>c44937	Otu00152	AM	TTAAGTTCAGCGGGTATTCTTACCTGATTTGAGGTCAAAAGTTGAGTGTCGTATACGAATGACCCTGACAAGCAGGTCGAACGTACTACATGAGATGATACGTCATCGCGCGTTCTTAATCAAGACTGATCTTAAATACGCTTTAAATCGTACCAGATTGATGAATTTTAAGCCACTTTGACATGAATTAACATATGAAAGACGGTTCAATTCCGACGCGATCACCCAAACAAAATATAATAATATTTCGTAAAGAGCAACGGCTTCGATTTTCGTTCTAACGACCCTCAAACAGGCATACTCCCCGGAATACCAGAGAGTGCAATTTGCGTTCAAAGATTCGATGATTCACAATTTCTGCAATTCACACTACTTATCGCATTTCGCTGCGTTCTTCAT…	FN547496	SH083145.07FU	414	Fungi	p__Glomeromycota	c__Glomeromycetes	o__Glomerales	f__Glomeraceae	g__unidentified	s__Glomerales_sp	3	311110 Funneliformis_caledonium	3.26532e-160	0.97	98.5507	0	0	0	0	0	0	0	0	0	0	0	0	0	0	0	0	0	0	0	0	0	0	0	0	0	0	0	0	0	0	0
>c126737	Otu00267	AM	TTAAGTTCAGCGGGTGTTCTTACCTGATTTGAGGTCAAATCATGAAAAATTTATGGACACGGAACCACGCGATATGGTCGCATCTAATAGATTTGGCATTAAAGATAGACGAATAAAAAAAAATTTATGTACGTCTAAAAATGCACAAAAAAGGTCAATTTTAAGCCTCTTAAAAAATACCCTGAAAAAGGGTGTTGTTATAAGATGACCCAAACTCCGGAACGTCACAAAAGAGCAACACGCCGATTTTTATTAATACTGACACTGATACAGGCATAC	FR732077	SH014983.07FU	279	Fungi	p__Glomeromycota	c__Glomeromycetes	o__Glomerales	f__Glomeraceae	g__unidentified	s__Glomerales_sp	2	318368 uncultured_Glomus	2.84457e-103	0.96	99.6416	0	0	0	0	0	0	0	0	0	0	0	0	0	0	0	0	0	0	0	0	0	0	0	0	0	0	0	0	0	0	0
>c1907	Otu00251	AM	TTAAGTTCAGCGGGTACTCTTACCTGATTTAAGGTCATTTTTAAAATATGTTTATGATTTTTTGATATTATAAAAACACCAAATAATCATATTTGACTTAATAAAACATCACTAAATGAGATAAAAATTATAAATAATTGCTCTTTTTAGTTCAGTTTATATAGCCATATATAACATAAAATTTAAGATCATCAAAAATAATGAAATCTTTGAAAAGATCCAATTCCATGATCCGATTTATAAAAAAAGGGATTCATGATAGATTTTTTATTTTTACTGACCCTCAAACAGGCATACTCCCCGGATTACCAGAGAGTGCAATATGCGTTCAAAGATTCGATGATTCACGTAATTCTGCAATTCACATTACTTATCGCAATTCGCCACGTTCTTCATCGA…	HF970339	SH206039.07FU	411	Fungi	p__Glomeromycota	c__Glomeromycetes	o__unidentified	f__unidentified	g__unidentified	s__Glomeromycetes_sp	2	303500 Claroideoglomeraceae_sp	4.5632e-138	0.92	98.5401	0	0	0	0	0	0	0	0	0	0	0	0	0	0	0	0	0	0	0	0	0	0	0	0	0	0	0	0	0	0	0
>a55747	Otu00076	AM	TTAAGTTCAGCGGGTATTCTTGCCTGATTTGAGGTCATTGTTAAATGTATCTTACAATCTCGACCAAGCACTTTTAGAAAAAAAGTGCTTCGATGGCCAAAAAATCGTAATTGCTTGATGAATCCGCCTAACGAGAGAATGTTTAATTGCTCCATTCGGTCGAATTTCATATTAAACAAGCGGTAACGTAAATTTGAGGCCATAAATCATTAATGAAATAAAGGCCCAATTCCACAATCAAAAGATTATGATAATTATTATTTACTGACCCTCAAACAGGCATACTCCCCGGAATACCAGAGAGTGCAATATGCGTTCAAAGATTCGATGATTCACGTAATTCTGCAATTCACATTACTTATCGCAATTCGCTGCGTTCTTCATCGATGACGAGTCTAG	HQ895804	SH208995.07FU	399	Fungi	p__Glomeromycota	c__Glomeromycetes	o__Glomerales	f__unidentified	g__unidentified	s__Glomeromycota_sp	3	304747 Glomeromycota_sp	1.09414e-156	0.97	98.4962	0	0	0	0	0	0	0	0	0	0	0	0	0	0	0	0	0	0	0	0	0	0	0	0	0	0	0	0	0	0	0
>c31718	Otu00262	AM	TTAAGTTCAGCGGGTATTCTTGCCTGATTTGAGGTCATTGTTGAATGTATTTTACAATCTCAACCAAGCACTTCTAAAAAAAAGTGCTTCGACGGCCAAAAAATCGTAATTGCTTGATGAATCCGCCTAACGAGAGAATGTTTAATTGCTCCATTCGGTCGAATTTCATAATAAACAAGCGGTAACGTAAATTTGAGGCCATAAATCATTAATGAAATAAAGGCCCAATTCCACAATCAAAAGATTATGATAATTATTATTTACTGACCCTCAAACAGGCATACTCCCCGGAATACCAGAGAGTGCAATATGCGTTCAAAGATTCGATGATTCACGTAATTCTGCAATTCACATTACTTATCGCAATTCGCTGCGTTCTTCATCGATGACGAGTCTAG	HQ895804	SH208995.07FU	398	Fungi	p__Glomeromycota	c__Glomeromycetes	o__Glomerales	f__unidentified	g__unidentified	s__Glomeromycota_sp	2	304747 Glomeromycota_sp	4.96227e-154	0.97	98.4925	0	0	0	0	0	0	0	0	0	0	0	0	0	0	0	0	0	0	0	0	0	0	0	0	0	0	0	0	0	0	0
>b52992	Otu00013	AM	TTAAGTTCAGCGGGTATTCTTACCTGATTTGAGGTCAAAAGTTGAATGTCGTATACGAATGAGCCTGACAAGCAGGTCGAACGTACTACATGAGATGGTACGTCATCGCGCGTTCTTAATCAAGGTTGATCTTAAATACGCTTTAAATCGTACCAGATTGATGAATTTTAAGCCACTTTGACATGAATTAACATATGAAAGAAGGCTCAATTCCGACGCAATCACCCAAACAAAATATAATAATTTCGTAAAGAGCGACGCTTCGATTTTTGTTCTAACGACCCTCAAACAGGCATACTCCCCGGAATACCAGAGAGTGCAATTTGCGTTCAAAGATTCGATGATTCACAATTTCTGCAATTCACACTACTTATCGCATTTCGCTGCGTTCTTCATCGT…	FN547496	SH083145.07FU	411	Fungi	p__Glomeromycota	c__Glomeromycetes	o__Glomerales	f__Glomeraceae	g__funneliformis	s__Glomus_caledonium	73	311110 Funneliformis_caledonium	2.49007e-159	0.97	98.5401	2	0	0	0	0	0	2	0	0	0	0	0	0	0	0	0	0	0	0	0	0	0	0	0	0	0	0	0	0	0	0
>a12262	Otu00102	AM	TTAAGTTCAGCGGGTACTCTTACCTGATTTGAGGTCATTTTGATGAGAATTATAGGCGCGAATCATGAGAATGATCACACCTAGTATTCGATATCACAAACGTACGTAAAATCATTTAAATACGTTCGAAAAATCATGCAAAATTTTAGGTCACTTAACCGAAGGTAAGACGACCCAAATCCGATGCGTCACCACGCAAGGCAGCAACAACACCGATTTTTATTTAACTGACCCTCAAACAGGCATACTCTCCGGAATACCAGAGAGTGCAATTTGCGTTCAAAGATTCGATGATTCACGGAACTCTGCAATTCACATTACTTATCGCACTTCGCTACGTTCTTCATCGATGACGAGTCTAG	GQ388273	SH176092.07FU	362	Fungi	p__Glomeromycota	c__Glomeromycetes	o__Glomerales	f__Glomeraceae	g__Glomus	s__Glomus_sp	5	290395 Glomeraceae_sp	2.48192e-144	0.99	98.3425	0	0	0	0	0	0	0	0	0	0	0	0	0	0	0	0	0	0	0	0	0	0	0	0	0	0	0	0	0	0	0
>d153778	Otu00100	AM	TTAAGTTCAGCGGGTACTCTTACCTGATTTGAGGTCATTTTGATGAGAAATTATGGGCGCGAATCATGAGAATGACCGCACCTAGTAATTCGATATCACAAACGTACGTAAATCATTTAAATACGTTCGAAAAATCATGCAAAAATTTTAGGTCACTTAACCGAAGGTAAGACGACCCAAATCCGATGCGTCACCACGCAAGGTGGCAACAAAACACCGATTTTTATTTAACTGACCCTCAAACAGGCATACTCTCCGGAATACCAGAGAGTGCAATTTGCGTTCAAAGATTCGATGATTCACGGAATTCTGCAATTCACATTACTTATCGCACTTCGCTGCGTTCTTCATCGATGACGAGTCTAG	JF439162	SH176130.07FU	366	Fungi	p__Glomeromycota	c__Glomeromycetes	o__Glomerales	f__Glomeraceae	g__Glomus	s__Glomus_sp	3	290433 Glomus_sp_7_SUN_2011	2.51447e-144	0.98	98.3607	0	0	0	0	0	0	0	0	0	0	0	0	0	0	0	0	0	0	0	0	0	0	0	0	0	0	0	0	0	0	0
>c164732	Otu00121	AM	TTAAGTTCAGCGGGTACTCTTACCTGATTTGAGGTCATTTTGATGAGAAATTATAGGCACGAATCATGAGAATGACCACACCTAGTATTAGATATCACAAACGTACGTAAATCATTTAAATACGTTCGAAAAATCATGCAAAATTTTTAGGTCACTTAACCGAAAGGTAAGACAACCCAAATCCGATGCGTCACCACGCAAGGCAGCAACAACATCGATTTTTATTTAACTGACCCTCAAACAGGCATACTCTCCGGAATACCAGAAAGTGCAATTTGCGTTCAAGGATTCGATGATTCACGGAATTCTGCAATTCACATTACTTATCGCACTTCGCCACGTTCTTCATCGATGACGAGTCTAG	HF970270	SH176131.07FU	364	Fungi	p__Glomeromycota	c__Glomeromycetes	o__Glomerales	f__Glomeraceae	g__Glomus	s__Glomus_sp	2	290434 Glomeraceae_sp	4.22382e-146	0.99	98.3516	0	0	0	0	0	0	0	0	0	0	0	0	0	0	0	0	0	0	0	0	0	0	0	0	0	0	0	0	0	0	0
>b95345	Otu00169	AM	TTAAGTTCAGCGGGTACTCTTACCTGATTTGAGGTCAATAGATGAAAAAATTATAGGCGCGAATCACGAAAATGACCACACCTAATATTCGATATCACAAACGTACGTAAAATAATTTAAATACGTTCGAAAAATCATACGAAATTTTAGGTCACTTAACCGAAGGGCAAAGACGACCCAATTCCGAAGCGTCACCACGAAATGCAGCAACAACCCCGATTTTTATTTAACTGACCCTCAAACAGGCATACTCTCCGGAATACCAGAGAGTGCAATTTGCGTTCAAAGATTCGATGATTCACGGAATACTGCAATTCACATTACTTATCGCACTTCGCTGCGTTCTTCATCGTTGACGAGTCTAG	EF393596	SH176129.07FU	365	Fungi	p__Glomeromycota	c__Glomeromycetes	o__Glomerales	f__Glomeraceae	g__Glomus	s__Glomus_sp	2	290432 Glomus_sp	3.16156e-141	0.97	98.3562	0	0	0	0	0	0	0	0	0	0	0	0	0	0	0	0	0	0	0	0	0	0	0	0	0	0	0	0	0	0	0
>c16726	Otu00278	AM	TTAAGTTCAGCGGATACTCTTACCTGATTTGAGGTCAATAGATGAAAAAATTATAGGCGCGAATCACGAAAATGACCACACCTAATATTCGATATCACAAACGTACGTAAATCAATTTAAATACGTTCGAAAAATCATACGAAATTTTAGGTCACATAACCGAAGGGCAAAGACGACCCAATTCCGAAGCGTCACCACGAAATGCAGCAACAACCCCGATTTTTATTTAACTGACCCTCAAACAGGCATACTCTCCGGAATACCAGAGAGTGCAATTTGCGTTCAAAGATTCGATGATTCACGGAATACTGCAATTCACATTACTTATCGCACTTCGCTACGTTCTTCATCGATGACGAGTCTAG	EF393596	SH176129.07FU	365	Fungi	p__Glomeromycota	c__Glomeromycetes	o__Glomerales	f__Glomeraceae	g__Glomus	s__Glomus_sp	2	290432 Glomus_sp	1.86992e-139	0.97	98.3562	0	0	0	0	0	0	0	0	0	0	0	0	0	0	0	0	0	0	0	0	0	0	0	0	0	0	0	0	0	0	0
>c100153	Otu01874	AM	TTAAGTTCAGCGGGTACTCTTGTCTGATTTGAGGCCCTGAATAAAAAATCTTCTTTCGCAGGGAAAGAGTGGCATTGGGGCAGGGGTATATATGGTGTATATATTCGCCACACCCATTGCGCGGCACGCACTTTTTCTCAACCCAAGCGTCGAAAATTTACTTACTACACGAGAATCGAAAGAAAAAGCCCACGCTGTTCATTATGCGCCACCAAAAAAACCTGGTTTTTTCGGAAAAGCTCATCAACGTGTGCACGCCGCATAGCGACCCGCACATTATTTGTTAAATGGTGCCCTCAAACAGACATGCCTTCCGAAAGAAGGCGCAATTTGCGTTCAAAGATTCGATGGTTCACAAAGTTCTGCAATTCACACTACTTATCGCATTTCGCTGCGTTC…	HM240238	SH194697.07FU	419	Fungi	p__Glomeromycota	c__Glomeromycetes	o__Paraglomerales	f__unidentified	g__unidentified	s__Paraglomerales_sp	19	298752 Glomeromycota_sp	1.78803e-146	0.94	98.568	0	0	0	0	0	0	0	0	0	0	0	0	0	0	0	0	0	0	0	0	0	0	0	0	0	0	0	0	0	0	0
>a24698	Otu02050	AM	TTAAGTTCGGCGGGTATTCTTGTCTGATTTGAGGCCCTGAAGATAAATTTTTCTTTCGGAGAAAGAGTGGCATTGGGGCAGGGGTAATTTTGCCACACCCATTGCGCATCGCGTTTTCTTTCGCAGCAAGTTTAAGTTTATTACACTCGCATTAAAAAAAAAGTCCGCGCCGTTCATTATGCGCCACCAAATACTAACGTTTTTGGAAAAGCTCATCGACGTGTACAGCACAAACCTGCACATTATTTGTTAAATGGTGCCCTCAAACAGACATGCCTTCCGGAAGAAGGCGCAATTTGCGTTCAAAGATTCGATGGTTCACAAAGTTCTGCAATTCACACTACTTATCGCATTTCGCTGCGTTCTTCATCGATGACGAGTCTAG	HM162336	SH474549.07FU	385	Fungi	p__Glomeromycota	c__Glomeromycetes	o__Paraglomerales	f__unidentified	g__unidentified	s__Paraglomerales_sp	7	330098 uncultured_Glomeromycota	4.3119e-107	0.87	98.4416	0	0	0	0	0	0	0	0	0	0	0	0	0	0	0	0	0	0	0	0	0	0	0	0	0	0	0	0	0	0	0
>a70583	Otu02232	AM	TTAAGTTCAGCGGGTACTCTTGTCTGATTTGAGGCCCTGAATAAAAAATCTTCTTTCGCAGGGAAAGAGTGGCATTGGGGCAGGGGTATATATATGGTATATATATTCGCCACACCCATTGCGCGGCACGCACTTTTTCTCAACCCAAGCGTCGAAATTTACTTACTACACGAGAATCGAAAGAAAAAGCCCACGCTGTTCATTATGCGCCACCGAAAAAACATGATTTTTTCGGAAAAGCTCATCAACGTGTGCACGCCGCATAGCGACCCGCACATTATTTGTTAAATGGTGCCCTCAAACAGACATGCCTTCCGAAAGAAGGCGCAATTTGCGTTCAAAGATTCGATGGTTCACAAAGTTCTGCAATTCACACTACTTATCGCATTTCGCTGCGTT…	HM240238	SH194697.07FU	420	Fungi	p__Glomeromycota	c__Glomeromycetes	o__Paraglomerales	f__unidentified	g__unidentified	s__Paraglomerales_sp	4	298752 Glomeromycota_sp	4.97229e-146	0.94	98.5714	0	0	0	0	0	0	0	0	0	0	0	0	0	0	0	0	0	0	0	0	0	0	0	0	0	0	0	0	0	0	0
>a46626	Otu02521	AM	TTAAGTTCAGCGGGTACTCTTGTCTGATTTGAGGCCCTGAATAAAAAATGTTCCTTCGCAGGGAAAGAGTGGCATTGGGGCAGGGGTAAATTCGCCACACCCATTGCGCGGCACGCACTTTTTCTCAACCCAAGCGTCGAAAATTTACTTACTACACGAGAATCGAAAGAAAAAGCCCACGCTGTTCATTATGCGCCACCGAAAAAACCTGGTTTTTTCGGAAAAGCTCATCAACGTGTGCACGCCGCATAGCGACCCGCACATTATTTGTTAAATGGTGCCCTCAAACAGACATGCCTCCCGAAAGAAGGCGCAATTTGCGTTCAAAGATTCGATGGTTCACAAAGTTCTGCAATTCACACTACTTATCGCATTTCGCTGCGTTCTTCATCGTTGACG…	HM240238	SH194697.07FU	406	Fungi	p__Glomeromycota	c__Glomeromycetes	o__Paraglomerales	f__unidentified	g__unidentified	s__Paraglomerales_sp	2	298752 Glomeromycota_sp	6.80764e-159	0.98	98.5222	0	0	0	0	0	0	0	0	0	0	0	0	0	0	0	0	0	0	0	0	0	0	0	0	0	0	0	0	0	0	0
>c3343	Otu03356	AM	TTAAGTTCAGCGGGTACTCTTGTCTGATTTGAGGCCCTGAATAAAAGATGTTCTTTCGCAGGGAAAGAGTGGCATTGTGGCAGGGGTAAATTCGCCACACCCATTGCGCGGCACGCACTTTTTCTCAACCCAAGCGTTGAACATTTACTACACGAGAATCGAAGAAAAAGCCCACGCGGTTCATTATGCGCCACCAAAAAAACCTGGTTTTTTCGGAAAAGCTCATCAACGTGCGCACGTCGTCCGTAAACGACGCGCACATTATTTGTTAGATGGTGCCCTCAAACAGACATGCCTTCCGAAAGAAGGCGCAATTTGCGTTCAAAGATTCGATGGTTCACAAAGTTCTGCAATTCACACTACTTATCGCATTTCGCTGCGTTCTTCATCGTTGACGAG…	DQ400289	SH194693.07FU	404	Fungi	p__Glomeromycota	c__Glomeromycetes	o__Paraglomerales	f__unidentified	g__unidentified	s__Paraglomerales_sp	2	298748 Paraglomerales_sp	6.76851e-159	0.98	98.5149	0	0	0	0	0	0	0	0	0	0	0	0	0	0	0	0	0	0	0	0	0	0	0	0	0	0	0	0	0	0	0
>c39825	Otu01448	AM	TTAAGTTCAGCGGGTACTCTTGTCTGATTTGAGGCCCTGAATAAAAGATTGTTCTTTCGCAGGGAAAGAGTGGCATTGGGGCAGGGGTAAATTCGCCACACCCATTGCGCGGCACGCACTTTTTCTCAACCCAAGCGTTGAAGATTTACTACACGAGAATCGAAGAAAAAGCCCACGCTGTTCATTATGCGCCACCAAAAAAACCTGGTTTTTTCGGAAAAGCTCATCAACGTGCACACATCGCTCGTAAAAACGACGCGCACATTATTTGTTAAATGGTGCCCTCAAACAGACATGCCTTCCGAAAGAAGGCGCAATTTGCGTTCAAAGATTCGATGGTTCACAAAGTTCTGCAATTCACACTACTTATCGCATTTCGCTGCGTTCTTCATCGTTGAC…	DQ400288	SH194694.07FU	407	Fungi	p__Glomeromycota	c__Glomeromycetes	o__Paraglomerales	f__Paraglomeraceae	g__Paraglomus	s__Paraglomus_sp	137	298749 Paraglomerales_sp	1.95164e-162	0.98	98.5258	0	0	0	0	0	0	0	0	0	0	0	0	0	0	0	0	0	0	0	0	0	0	0	0	0	0	0	0	0	0	0
>a44154	Otu01473	AM	TTAAGTTCAGCGGGTGTTCCTACCTGATTTGAGGTCAAATCATGAAAAATTTATAGACACAAAACCACATGATATGGTCGCATCTAATAGATTTTGGCATTAAGATAGACGAATAAAAAAAAATTTATGTACGTCTAAAATGCACAAAAAAAGGTCAATTTTAAGCCTCTTAAAAACCCAGAAGAGTTAAGATAACTCAAACTCCGGAAACATCACAAAAAAATTGCGACGCACCGATTTTTATTAACACTGACCCTCAAACAGGCATACTCCCCGGGTTGCCAGAGAGTGCAATTTGCGTTCAAAGATTCGATGATTCACGGAATTCTGCAATTCACATTACTTATCGCACTTCGCTGCGTTCTTCATCGATGACGAGTCTAG	JF820508	SH175545.07FU	384	Fungi	p__Glomeromycota	c__Glomeromycetes	o__Glomerales	f__Glomeraceae	g__Rhizophagus	s__Rhizophagus_sp	121	290181 Rhizophagus_irregularis_DAOM_181602	6.0018e-151	0.98	98.4375	4	0	2	0	0	0	0	0	0	0	0	0	2	0	0	0	0	0	0	0	0	0	0	0	0	0	0	0	2	0	0
>a16760	Otu01496	AM	TTAAGTTCAGCGGGTGTTCCTACCTGATTTGAGGTCAAATCATGAAAAATTTATAGACACGGAACCACAAGATATGGTCGCATCTAATAGATTTTGGCATTAGGATGGACGAATAAAAAAAAAAATTTATGTACGTCTAAAAATGCACAAAAAAAGGTCAATTTTAAGCCTCTTAAAAAAACCGAAGTTAATTAAGATAACTCAAACTCCGGAAACGTCACAAAAATTGCAACGCACCCGATTTTTATTAACACTGACCCTCAAACAGGCATACTCCCCGGGTTGCCAGAGAGTGCAATTTGCGTTCAAAGATTCGATGATTCACGGAATTCTGCAATTCACATTACTTATCGCACTTCGCTGCGTTCTTCATCGATGACGAGTCTAG	AJ567732	SH001081.07FU	388	Fungi	p__Glomeromycota	c__Glomeromycetes	o__Glomerales	f__Glomeraceae	g__Rhizophagus	s__Rhizophagus_sp	106	312114 Rhizophagus_sp	3.59335e-149	0.97	98.4536	0	0	0	0	0	0	0	0	0	0	0	0	0	0	0	0	0	0	0	0	0	0	0	0	0	0	0	0	0	0	0
>c62410	Otu01575	AM	TTAAGTTCAGCGGGTGTTCCTACCTGATTTGAGGTCAAATCATGAAAAATTTATAGACACGGAACCACACTATATGGTCGCATCTAATAGATTTTGGCATTAAGATAAACGAATAAAAAAATTTATGTACGTCTAAAATGCACAAAAAAGGTCAATTTTAAGCCTCTTAAAACCCAGAAGGAAGTTAAGATAACTCAAACTCCGGAACATCACAAAAATTGCAACATACCGATTTTTATTAACACTGACCCTCAAACAGGCATACTCCCCGGGTTACCAGAGAGTGCAATTTGCGTTCAAAGATTCGATGATTCACGGAATTCTGCAATTCACATTACTTATCGCACTTCGCTGCGTTCTTCATCGTTGACGAGTCTAG	HF968913	SH175527.07FU	379	Fungi	p__Glomeromycota	c__Glomeromycetes	o__Glomerales	f__Glomeraceae	g__Rhizophagus	s__Rhizophagus_sp	58	290163 Glomeraceae_sp	7.01582e-140	0.96	98.4169	0	0	0	0	0	0	0	0	0	0	0	0	0	0	0	0	0	0	0	0	0	0	0	0	0	0	0	0	0	0	0
>a94958	Otu01672	AM	TTAAGTTCAGCGGGTGTTCCTACCTGATTTGAGGTCAAATCATGAAAATTTATGGACACGAAACCACATGATATGGTCGCATCTAATAGATTTTGGCATTAGAATAAACGAATAAAAAAAAAATTTATGTACGTCTAAAAAATGCGCAAAAAAGGTCAATTTTAAGCCTCTTAAACTAAAAAATTAAGATAACTCAAATTCCGGAACGTCACAAAAAAAGCAACATACCGATTTTTATTATATTGACCCTCAAACAGGCATACTCTCCGAAAAGAGTGCAATTTGCGTTCAAAGATTCGATGATTCACGGAATTTGCAATTCACATTACTTATCGCACTTCGCTGCGTTCTTCATCGTTGACGAGTCTAG	JN685230	SH001125.07FU	370	Fungi	p__Glomeromycota	c__Glomeromycetes	o__Glomerales	f__Glomeraceae	g__Rhizophagus	s__Rhizophagus_sp	37	312158 uncultured_Glomeromycota	3.21289e-141	0.97	98.3784	4	0	0	2	0	0	0	0	0	0	0	0	0	0	0	0	0	0	0	0	0	0	0	0	0	0	0	0	0	0	0
>a88033	Otu01670	AM	TTAAGTTCAGCGGGTGTTCCTACCTGATTTGAGGTCAAATCATGAAAAAATTTATAGATACGGAACCACACGATAAGGTCGCATCTAATAGATTTTGGCATTAGAATAAACGAAATAAAAAAATTTATGTACGTCTAAAATGCGCAAAAATGATGTCAATTTTAAGCCTCTTAAAACACCTCGAAAGGTATCGTTATAAGATAACCCAAACTCCGGAGCGTCACAAAAGAGCAACACGCCGATTTTTATTAATACTGACCCTCAAACAGGCATACTCTCCGAAGAGAGTGCAATTTGCGTTCAAAGATTCGATGATTCACGGAATTCTGCAATTCACATTACTTATCGCACTTCGCTGCGTTCTTCATCGTTGACGAGTCTAG	FJ769312	SH175559.07FU	383	Fungi	p__Glomeromycota	c__Glomeromycetes	o__Glomerales	f__Glomeraceae	g__Rhizophagus	s__Rhizophagus_sp	36	290195 Rhizophagus_intraradices	7.54762e-148	0.97	98.4334	0	0	0	0	0	0	0	0	0	0	0	0	0	0	0	0	0	0	0	0	0	0	0	0	4	0	0	0	0	0	0
>a74821	Otu02000	AM	TTAAGTTCAGCGGGTGTTCCTACCTGATTTGAGGTCAAATCATGAAAAATTTATAGACACGAAACCACATGATATGGTCGCATCTAATAGATTTTGGCATTAAGATAGACGAATAAAAAAAAATTTTATGTACGTCTAAAATGCACAAAAAAAGGTCAATTTTAAGCCTCTTGAAAACCCAGAAGAGTTAAGATAACTCAAACTCCGGAAACATCACAAAAAAGTTGCGACGCACCGATTTTTATTAACACTGACCCTCAAACAGGCATACTCCCCGGGTTGCCAGAGAGTGCGATTTGCGTTCAAAGATTCGATGATTCACGGAATTCTGCAATTCACATTACTTATCGCACTTCGCCACGTTCTTCATCGATGACGAGTCTAG	JF820508	SH175545.07FU	385	Fungi	p__Glomeromycota	c__Glomeromycetes	o__Glomerales	f__Glomeraceae	g__Rhizophagus	s__Rhizophagus_sp	15	290181 Rhizophagus_irregularis_DAOM_181602	7.59406e-148	0.97	98.4416	4	0	0	0	0	0	0	0	0	0	0	0	0	0	0	2	0	0	0	0	0	0	0	0	0	0	0	0	0	0	0
>d129244	Otu02131	AM	TTAAATTCAGCGGGTGTTCCTACCTGATTTGAGGTCAAATCATGAAAAATTTATAGACACGGAACCACAAGATATGGTCGCATCTAATAGATTTTGGCATTAGGATGGACGAATAAAAAAAAAATTTATGTACGTCTAAAAAAATGCACAAAAAAAGGTCAATTTTAAGCCTCTTAAAAAAACCGAAGTTAATTAAGATAACTCAAACTCCGGAAACGTCACAAAAATTGCAACGCACCCGATTTTTATTAACACTGACCCTCAAACAGGCATACTCCCCGGGTTGCCAGAGAGTGCAATTTGCGTTCAAAGATTCGATGATTCACGGAATTCTGCAATTCACATTACTTATCGCACTTCGCTACGTTCTTCATCGATGACGAGTCTAG	AJ567732	SH001081.07FU	389	Fungi	p__Glomeromycota	c__Glomeromycetes	o__Glomerales	f__Glomeraceae	g__Rhizophagus	s__Rhizophagus_sp	4	312114 Rhizophagus_sp	1.26083e-145	0.97	98.4576	0	0	0	0	0	0	0	0	0	0	0	0	0	0	0	0	0	0	0	0	0	0	0	0	0	0	0	0	0	0	0
>d113574	Otu04129	AM	TTAAGTTCAGCGGGTGTTCCTACCTGATTTGAGGTCAAATCATGAAAAATTTATAGACACGGAACCACAAGATATGGTCGCATCTAATAGATTTTGGCATTAGGATGGACGAATAAAAAAAAAATTTTATGTACGTCTAAAATGCACAAAAAAAGGTCAATTTTAAGCCTCTTGAAAACCCAGAAGAGTTAAGATAACTCAAACTCCGGAAACATCACAAAAAAATTGCGACGCACCGATTTTTATTAACACTGACCCTCAAACAGGCATACTCCCCGGGTTGCCAGAGAGTGCAATTTGCGTTCAAAGATTCGATGATTCACGGAATTCTGCAATTCACATTACTTATCGCACTTCGCTACGTTCTTCATCGATGACGAGTCTAG	JF820508	SH175545.07FU	386	Fungi	p__Glomeromycota	c__Glomeromycetes	o__Glomerales	f__Glomeraceae	g__Rhizophagus	s__Rhizophagus_sp	2	290181 Rhizophagus_irregularis_DAOM_181602	4.50528e-146	0.97	98.4456	0	0	0	0	0	0	0	0	0	0	0	0	0	0	0	0	0	0	0	0	0	0	0	0	0	0	0	0	0	0	0
>c68320	Otu00158	AM	TTAAGTTCAGCGGGTACTCTTACCTGATTTGAGGTCATTTTTAAAATATGTTTATGATTTTTTGATATTATAAAACACCAAATAATCATATTTGGCTTAATCAAACATACTTAAATGAGATTATAAATAATTGCTCTTTTTAGTTCAGTTTATATATAGCCATATAACAAATTTAAGATCATCAAAAATAATAAAATCTTTGAAAGATCCAATTCCATTGATCCAATTTAATAAAATAAAGGATTTCATGATAGATTTTTTATTTTTACTGACCCTCAAACAGGCATACTCCCCGGATTACCAGAGAGTGCAATATGCGTTCAAAGATTCGATGATTCACGTAATTCTGCAATTCACATTACTTATCGCAATTCGCTGCGTTCTTCATCGGTGACGAGT…	HF970339	SH206039.07FU	403	Fungi	p__Glomeromycota	c__Glomeromycetes	o__Glomerales	f__unidentified	g__unidentified	s__uncultured_Glomerales	2	303500 Claroideoglomeraceae_sp	7.09641e-132	0.92	98.5112	0	0	0	0	0	0	0	0	0	0	0	0	0	0	0	0	0	0	0	0	0	0	0	0	0	0	0	0	0	0	0
>c70623	Otu02279	AM	TTAAGTTCAGCGGGTACTCTTACCTGATTTGAGGTCATTTTTAAAATATGTTTATGATTTTTTGATATTATAAAAACACCAAATAATCATATTTGACTTAATAAAACATCACTAAATGAGATAAAAATTATAAATAATTGCTCTTTTTAGTTCAGTTTATATAGCCATATATAACATAAAATTTAAGATCATCAAAAATAATGAAATCTTTGAAAAGATCCAATTCCATGATCCGATTTAATAAAATAAATTAAAAAAAGGATTCATGATAGATTTTTTATTTTTACTGACCCTCAAACAGGCATACTCACCGGATTACCAGAGAGTGCAATATGCGTTCAAAGATTCGATGATTCACGTAATTCTGCAATTCACATTACTTATCGCAATTCGCTGCGT…	HF970339	SH206039.07FU	421	Fungi	p__Glomeromycota	c__Glomeromycetes	o__Glomerales	f__unidentified	g__unidentified	s__uncultured_Glomerales	2	303500 Claroideoglomeraceae_sp	3.50095e-133	0.91	98.5748	0	0	0	0	0	0	0	0	0	0	0	0	0	0	0	0	0	0	0	0	0	0	0	0	0	0	0	0	0	0	0
>c81501	Otu03360	AM	TTAAGTTCAGCGGGTACTCTTACCTGATTTGAGGTCATTTTTAAAATATGTTTATGATTTTTTGATATTATAAAAACACCAAAATAATCATATTTGACTTAATAAAACATCACTTAAATGAGATTATAAATAATTGCTCTTTTTAGTTCAGTTTATATATAGCCATATAACATAAATTTAAGATCATCAGAGGATAATAAAAATCTTTGAAAAGATCCAATTCCATTGATCCGATTTATAAAAAAAGGATTCATGATTTTTTATTTTTACTGACCCTCAAACAGGCATACTCACCGGATTACCAGAGAGTGCAATATGCGTTCAAAGATTCGATGATTCACGTAATTCTGCAATTCACATTACTTATCGCAATTCGCTGCGTTCTTCATCGTTGACGAG…	HF970339	SH206039.07FU	404	Fungi	p__Glomeromycota	c__Glomeromycetes	o__Glomerales	f__unidentified	g__unidentified	s__uncultured_Glomerales	2	303500 Claroideoglomeraceae_sp	1.51788e-130	0.91	98.5149	0	0	0	0	0	0	0	0	0	0	0	0	0	0	0	0	0	0	0	0	0	0	0	0	0	0	0	0	0	0	0
>a49965	Otu01825	Saprotroph	TTAAGTTCAGCGGGTAATCCCGCCTGATTTCAGATCAAAGGTAAAAGGGTTTAGTTACAACTTTCGGCAGACCGGCCCCGCTCTTTATAAAAAGTTACATTTATCAAGTGCGGGAGACCATTTGGCCCACCATTGCAACAGTCATTCCAGCCGAGACAATCCCCCTGATGGGAGGACCGCTGGGCCACCGGTTATGCTCTTTCCCCTCCTTGGCCAAAAAGCCTTGGAGGAGAAAGGTTATAATGATACTGAAACAGGCGTACCCTTTGGAATACCAAAGGGTGCAAGATGCGTTCAAAGATTTGATGATTCACTAGAGGCAGATCACACTACATATCGCGATTCGCTGCGTTCTTCATCGTTGACGAGTCTAG	AY944879	SH190045.07FU	374	Fungi	p__Mucoromycota	c__Incertae_sedis	o__Mucorales	f__Cunninghamellaceae	g__Absidia	s__Absidia_sp	10	296628 Absidia_glauca	1.2095e-145	0.98	98.1283	0	0	0	0	0	0	0	0	0	0	0	0	0	0	0	0	0	0	0	0	0	0	0	0	0	0	0	0	0	0	0
>b81516	Otu00103	Saprotroph	TTAAGTTCAGCGGGTAATCCCGCCTGATTTCAGATCAAGAGATATAATTTAGCAGGGGCACCTCTATAGAGTTTCTCGTTGCTTTTAGCAGAATAAACTACCAAAGGGTAAGAAGCAACTCTAAAGAGGGATGCCAGAGCATTTAAGCCGCCAGAGAATATATCCTCGGGGGCCAGTAGTGATTTTTCCCAGCACACCCTTTCGGGGGAGAGAAGTATAAATGATACTGAAACAGGCGTACCCCCAGGAATACCCAGGGGTCCAAGATGCGTTCAAAGATTTGATGATTCACTATGGGCAGATCACACTACATATCGCGATTTGCTGCGTTCTTCATCGTTGACGAGTCTAG	JN205822	SH199695.07FU	352	Fungi	p__Mucoromycota	c__Incertae_sedis	o__Mucorales	f__Cunninghamellaceae	g__Absidia	s__Absidia_sp	4	300964 Absidia_cylindrospora_var._cylindrospora	1.73747e-135	0.98	96.0227	0	0	0	0	0	0	0	0	0	0	0	0	0	0	0	0	0	0	0	0	0	0	0	0	0	0	0	0	0	0	0
>b2124	Otu02819	Saprotroph	TTAAGTTCAGCGGGTAGTCCCATCTGATTTCAGGCCAAGATTTAAAAGTAAAATGATGGCTATAAACCTAATAAGAAATAAATCCTATTAAAGCCGACTAGGTTTTACCAGATGCGAGATCTAATAAAAAAGTCGAGCCTTATATTTAGGTCGAGAGTAATTCTTAATAAATCAAGAATCACCAGAACCAGTAATAATTTATCTCTTCCTTTTAAACCACCAAGGTGGAGGGGAGATTTACTAGTGGTACTGAAACAGACGTACCTTATGGAATACCATAAGGTGCAAGATGCGTTCAAAGATTTGATGATTCACTATAGGCAGATCACATTACATATCGCGATTTGCTGCGTTCTTCATCGTTGACGAGTCTAG	JN205882	SH216493.07FU	375	Fungi	p__Mucoromycota	c__Incertae_sedis	o__Mucorales	f__Cunninghamellaceae	g__Cunninghamella	s__Cunninghamella_elegans	2	307826 Cunninghamella_elegans	2.11461e-151	0.99	98.1333	0	0	0	0	0	0	0	0	0	0	0	0	0	0	0	0	0	0	0	0	0	0	0	0	0	0	0	0	0	0	0
>b139554	Otu01510	Saprotroph	TTAAGTTCAGCGGGTATCCCTACCTAATTCGAGGTCTTTTTGTAAAAAAGTGTCCGAAGACGTTTGATCCGGCGGGTATCAGTGGGTAGGCTTCGCATTTTGCTGCGCTTCCAGGCCGCACCGGCACCGCCGATGATTTCGAGGGCCGCCGCTCGTAAGAGGGCGTGCCCCAACACCAAGCCAGGCTTGAGAGACCAAACGACGCTCGAATAGGCATGCCCCTAGGAATACCAGGGGGCGCAATGTGCGTTCAAAAACTCGATGATTCACTGAAATCTGCAATTCACATTAATTATCGCATTTCGCTGCGTTCTTCATCGATGACGAGTCTAG	FR821312	SH030934.07FU	333	Fungi	p__Ascomycota	c__Incertae_sedis	o__Incertae_sedis	f__Incertae_sedis	g__Leptodiscella	s__Leptodiscella_sp	77	326281 Leptodiscella_sp_FMR_10885	6.54908e-117	0.98	88.5886	0	0	0	0	0	0	0	0	0	0	0	0	0	0	0	0	0	0	0	0	0	0	0	0	0	0	0	0	0	0	0
>b36539	Otu02176	Saprotroph	TTAAGTTCAGCGGGTATCCCTACCTAATTCGAGGTCTTTTTGTGAAAAAAGTGTCCGAAGACGTTTGATCCGGCGGGTATCGGTGGGTAGGCTTCGCATTTTGCTGCGCTTCCAGGCCGCACCGGCACCGCCGATGATTTCGAGAGCCGCCGCTCGTGAGAGGGCGCGCTCCAACACCAAGCCAGGCTTGAGAGACCAAACGACGCTCGAATAGGCATGCCCCTAGGAATACCAAGGGGCGCAATGTGCGTTCAAAAACTCGATGATTCACTGAAATCTGCAATTCACATTAATTATCGCATTTCGCTGCGTTCTTCATCGATGACGAGTCTAG	FR821312	SH030934.07FU	334	Fungi	p__Ascomycota	c__Incertae_sedis	o__Incertae_sedis	f__Incertae_sedis	g__Leptodiscella	s__Leptodiscella_sp	2	326281 Leptodiscella_sp_FMR_10885	4.90383e-112	0.96	88.6228	0	0	0	0	0	0	0	0	0	0	0	0	0	0	0	0	0	0	0	0	0	0	0	0	0	0	0	0	0	0	0
>a12613	Otu01604	Saprotroph	TTAAGTTCAGCGGGTCTTCCTACCTGATTTGAGACCTGTATCAGAGGCAAGCCTCTATTTCATTGCATCGTGAGATGCGCTGAAGGGATTGACCTAGCGACTCTTGGGAATCAACACGTCGAAAAGGCAGAGTAAACTCTTTCAATTACGGCTGTCTCATCCTTGGGAATCGATCAATTCTCTATTTCAAGTCGGCCTCTTTGACAAGGCATGACTCAAGTCCAACACTCTACACTTTCCCGAAGGAAAGAATAAGAGGTCGAGGGTAAAGAGATACTCAAACAGGCATGCTCTCCGGAATACCAGAGAGCGCAATATGCGTTCAAAGATTCGATGATTCACTGAATTCTGCAATTCACATTACGTATCGCATTTCGCTGCGTTCTTCATCGTTGACGA…	HQ191339	SH009843.07FU	405	Fungi	p__Mortierellomycota	c__Incertae_sedis	o__Mortierellales	f__Mortierellaceae	g__Mortierella	s__Morterella_sp	60	316100 uncultured_Chytridiomycota	1.7697e-49	0.72	98.5185	0	0	0	0	0	0	0	0	0	0	0	0	0	0	0	0	0	0	0	0	0	0	0	0	0	0	0	0	0	0	0
>a139876	Otu01774	Saprotroph	TTAAGTTCAGCGGGTAGTCTTACTTGATTTGAGATCGAGTTTAACAAGCGTCGTTGCCGACCCCTGTGAAATCCTGCATCAGTCAGCCAATACGGTCAAACTCCCTTTATGTTAGCTGCAGCAAAAGTAATAATCCGTTTGACGGGACTAAATGAATATGCTTTTAGCTCAGGAGAATGTCCAGCTGCACCTGCATTTCAAGCAACCCGCCTCCGATCTAAAAAAGACTGGTGTTGGGATTGCTCAAGTCCAAAGCTTTCAAAAAAAAATCAAAAGCTTTGAGGTGTTTACTGATACTCAAACAAGCATGCTCTTCGGAATACCAAAGAGCGCAATATGCGTTCAAAGATTCGATGATTCACTGAATTCTGCAATTCACATTACGTATCGCATTTCGCT…	FJ161928	SH180118.07FU	425	Fungi	p__Mortierellomycota	c__Incertae_sedis	o__Mortierellales	f__Mortierellaceae	g__Mortierella	s__Mortierella_elongata	16	292220 Mortierella_elongata	6.23377e-174	0.99	98.5882	0	0	0	0	0	0	0	0	0	0	0	0	0	0	0	0	0	0	0	0	0	0	0	0	0	0	0	0	0	0	0
>b135147	Otu04523	Saprotroph	TTAAGTTCAGCGGGTAGTCTTACTTGATTTAAGATCGAGTTTAACAAGAATCGTTGCCGACCCTTGTAAAATCCTGCATCAGTCAGCCAATACGGTCAAAATCCCTTTATGTTTGCTGCAGCAAAAGTAATAATCCGTTTGACGGGACTCAAGGAAAAAGCTTTCAAAAAAAAATCCAAAAGCTTTGAGGTGTTTACTGATACTCAAACAAGCATGCTCTTCGGAATACCAAAGAGCGCAATATGCGTTCAAAGATTCGATGATTCACTGAATTCTGCAATTCACATTACGTATCGCATTTCGCTGCGTTCTTCATCGTTGACGAGTCTAG	FJ161928	SH180118.07FU	331	Fungi	p__Mortierellomycota	c__Incertae_sedis	o__Mortierellales	f__Mortierellaceae	g__Mortierella	s__Mortierella_elongata	2	292220 Mortierella_elongata	7.18832e-63	0.96	53.7764	0	0	0	0	0	0	0	0	0	0	0	0	0	0	0	0	0	0	0	0	0	0	0	0	0	0	0	0	0	0	0
>a2930	Otu01229	Saprotroph	TTAAGTTCAGCGGGTAGTCTTACTTGATTTGAGATCGAGTTTGACAGAGACAAAACCGTTGCCGGCCTTTTCTCTGTGAAATCCTGCATCAGTCAGCCATAATGGTCAAAACTCCCTTTATGTTAGCTGCAGCAAAAAGTAATAATCCGTTTGACGGGACTAAATAAATATGCTTTTAGCTCAGGAGATTGTCCAGCTGCACCTGCATTTCAAGCAACCCGCCGCAACAGATCTTAAAAGAAAAGGCGTTGGGTTTGCTCAAGTCCAAAACGCTTGAAAAAGATCAAGAGTTTTGAGGTGTTTACTGATACTCAAACAAGCATGCTCTTCGGAATACCAAAGAGCGCAATATGCGTTCAAAGATTCGATGATTCACTGAATTCTGCAATTCACATTACG…	JX975863	SH214063.07FU	439	Fungi	p__Mortierellomycota	c__Incertae_sedis	o__Mortierellales	f__Mortierellaceae	g__Mortierella	s__Mortierella_exigua	6204	306831 Mortierella_exigua	4.0671e-180	0.99	98.1777	2	0	0	4	4	0	0	0	0	0	5	2	0	9	0	4	0	0	0	3	0	0	4	0	0	0	0	0	0	0	0
>a8388	Otu01417	Saprotroph	TTAAGTTCAGCGGGTAGTCTTACTTGATTTGAGATCGAGTTTTACAAAAATCGTTGCCGACCCTTGTGAAATCCTGCATCAGTCAGCCAATAAGGTCAAACTCCCTTTATGTAAGCTGCAGCAAAAGTAATAATCCGTTTGACGGGACTAAATAAATATGCTTTTAGCTCAGGAGAATGTCCAGCTGCACCTGCATTTCAAGCAACCCGCCGCCGATCTGAAATAGAAAGGTGTTGGGTTCGCTCAAGTCCAAGGCTTTTCAAAAAATGGAAAGCTTTGAGGTGTTTACTGATACTCAAACAAGCATGCTCTTCGGAATACCAAAGAGCGCAATATGCGTTCAAAGATTCGATGATTCACTGAATTCTGCAATTCACATTACGTATCGCATTTCGCTGC…	JX045738	SH180138.07FU	423	Fungi	p__Mortierellomycota	c__Incertae_sedis	o__Mortierellales	f__Mortierellaceae	g__Mortierella	s__Mortierella_exigua	137	292240 Mortierella_exigua	2.73579e-167	0.98	98.5816	0	0	0	2	0	0	0	0	0	2	0	0	0	0	0	0	0	0	2	2	0	9	3	0	0	0	0	0	0	0	0
>b74714	Otu01711	Saprotroph	TTAAGTTCAGCGGGTAGTCTTACTTGATTTGAGATCGGGTTTGACAGAGACAAAACCGTTTCCGGCCTTTCCTCTATGATATCCTGCATCAGTCAGCCATAATGGTCAAGACCCCCTTTATGTTAGCTGCAGCAAAAAGTAATCAGTTTGACGGGACTAAATAAATATGCTTTTAGCTCAGGAGATTGTCCAGCTGCACCTGCATTTCAAGCAACCCGCCGCAACAGATCTTAAAAGAAAAGGCGTTAGGTTTGCTCAAGTCCAAAACGCTTGAAAAAGATCGAGTTTTGAGGTGTTTACTGATACTCAAACAAGCATGCTCTTCGGAATACCAAAGAGCGCAATATGCGTTCAAAGATTCGATGATTCACTGAATTCTGCAATTCACATTACGTATCG…	JX975863	SH214063.07FU	434	Fungi	p__Mortierellomycota	c__Incertae_sedis	o__Mortierellales	f__Mortierellaceae	g__Mortierella	s__Mortierella_exigua	19	306831 Mortierella_exigua	9.85873e-164	0.96	98.1567	0	0	0	0	0	0	0	0	0	0	0	0	0	0	0	0	0	0	0	0	0	0	0	0	0	0	0	0	0	0	0
>b139545	Otu01637	Saprotroph	TTAAGTTCAGCGGGTAGTCTTACTTGATTTGAGATCGAGTTTGACAGAGACAAAACCGTTGCCGGCCTTTTCTCTGTGAAATCCTGCATCAGTCAGCCATAATGGTCAAAACTCCCTTTATGTTAGCTGCAGCAAAAAGTAATAATCCGTTTGACGGGACTAAATAAATATGCTTTTAGCTCAGGAGATTGTCCCGCTGCACCTGATCTTCAAACAAAAGGCGTTGGGTTTGCTCAAGTCCAAAACGCTTGAAAAAGATCAAGAGTTTTGAGGTGTTTACTGATACTCAAACAAGCATGCTCTTCGGAATACCAAAGAGCGCAATATGCGTTCAAAGATTCGATGATTCACTGAATTCTGCAATTCACATTACGTATCGCATTTCGCTACGTTCTTCAT…	JX975863	SH214063.07FU	414	Fungi	p__Mortierellomycota	c__Incertae_sedis	o__Mortierellales	f__Mortierellaceae	g__Mortierella	s__Mortierella_exigua	18	306831 Mortierella_exigua	6.16823e-143	0.93	98.0676	0	0	0	0	0	0	0	0	0	0	0	0	0	0	0	0	0	0	0	0	0	0	0	0	0	0	0	0	0	0	0
>c103700	Otu01804	Saprotroph	TTAAGTTCAGCGGGTAGTCTTACTTGATTTGAGATCGAGTTTGACAGAGACAAAACCGTTGCCGGCCTTTTCTCTGTGAAATCCTGCATCAGTCAGCCATAATGGTCAAAACTCCATTTATGTTAGCTGCAGCAAAAAGTAATAATCCGTTTGACGGGACTAAATAAATATGCTTTTAGCTCAGGAGATTGTCCAGCTGCACCTGCATTTCAAAGAAACCGCCGCAGGTTTGCTCAAGTCCAAAACGCTTGAAAAAGATCAAGAGTTTTGAGGTGTTTACTGATACTCAAACAAGCATGCTCTTCGGAATACCAAAGAGCGCAATATGCGTTCAACGATTCGATGATTCACTGAATTCTGCAATTCACATTACGTATCTCATTTCGCCACGTTCTTCAT…	JX975863	SH214063.07FU	414	Fungi	p__Mortierellomycota	c__Incertae_sedis	o__Mortierellales	f__Mortierellaceae	g__Mortierella	s__Mortierella_exigua	8	306831 Mortierella_exigua	2.15776e-139	0.92	98.0676	0	0	0	0	0	0	0	0	0	0	0	0	0	0	0	0	0	0	0	0	0	0	0	0	0	0	0	0	0	0	0
>c83230	Otu01963	Saprotroph	TTAAGTTCAGCGGGTAGTCTTACTTGATTTGAGATCGAGTTTGACAGAGACAAAACCGTTGCCGGCCTTTTCTCTGTGAAATCCTGCATCAGTCAGCCATAATGGTCAAAACTCCCTTTATGTTAGCTGCAGCAAAAAGTAATAATCCGTTTGACGGGACTAAATAACTGTACCTGCATTTCAAGCAACCCGCCGCAACAGATCTTAAAAGAAAAGGCGTTGGGTTTGCTCAAGTCCAAAACGCTTGAAAAAGATCAAGAGTTTTGAGGTGTTTACTGATACTCAAACAAGCATGCTCTTCGGAATACCAAAGAGCGCAATATGCGTTCAAAGATTCGATGATTCACTGAATTCTGCAATTCACATTACGTATCGCATTTCGCTGCGTTCTTCATCGAT…	JX975863	SH214063.07FU	410	Fungi	p__Mortierellomycota	c__Incertae_sedis	o__Mortierellales	f__Mortierellaceae	g__Mortierella	s__Mortierella_exigua	7	306831 Mortierella_exigua	2.77419e-140	0.92	98.0488	0	0	0	0	0	0	0	0	0	0	0	0	0	0	0	0	0	0	0	0	0	0	0	0	0	0	0	0	0	0	0
>a17534	Otu01798	Saprotroph	TTAAGTTCAGCGGGTAGTCTTACTTGATTTGAGATCGAGTTTGACAGAGACAAAACCGTTGCCGGCCTTTTCTCTGTGAAATCCTGCATCAGTCAGCCATAATGGTCAAAACTCCCTTTATGTTAGCTGCAGCAAAAAGTAATAATCCGTTTGACGGGACTAAATAAATATGCTTTTAGCTCAGGTGAATTTCAAGCAACCCGCCGCAACAGATCTTAAAAGAAAAGGCGTTGGGTTTGCTCAAGTCCAAAACGCTTGAAAAAGATCAAGAGTTTTGAGGTGTTTACTGATACTCAAACAAGCATGCTCTTCGGAATACCAAAGAGCGCAATATGCGTTCAAAGATTCGATGATTCACTGAATTCTGCAATTCACATTACGTATCGCATTTCGCCACGT…	JX975863	SH214063.07FU	421	Fungi	p__Mortierellomycota	c__Incertae_sedis	o__Mortierellales	f__Mortierellaceae	g__Mortierella	s__Mortierella_exigua	6	306831 Mortierella_exigua	4.07445e-153	0.94	98.0998	0	0	0	0	0	0	0	0	0	0	0	0	0	0	0	0	0	0	0	0	0	0	0	0	0	0	0	0	0	0	0
>a37382	Otu02777	Saprotroph	TTAAGTTCAGCGGGTAGTCTTACTTGATTTGAGATCGAGTTTAACAGAAATCTTTGACGAGATCTGCGAAATCCTGCATCAGTCAGCATATGAGGTCAAGCTCCCTTTATGTTAGCTGCAGCAAAGTAATAATCCGTTTTACGGGACTAAATAGATATGCCTTTAGCTCAGGAGAATGTCCAGCTGCACCTGCATTTCAAGCAACCCGCCGTCGATCTGAAAAAGAAAGGCGTTGGGTTTGCTCAAGTCCAAGACCGTCAAAAAAAAATTGAAGGTCTTGAGGTGTTTACTGATACTCAAACAAGCATGCTCTTCGGAATACCAAAGAGCGCAATATGCGTTCAAAGATTCGATGATTCACTGAATTCTGCAATTCACATTACGTATCGCATTTCGCTG…	JX045738	SH180138.07FU	424	Fungi	p__Mortierellomycota	c__Incertae_sedis	o__Mortierellales	f__Mortierellaceae	g__Mortierella	s__Mortierella_exigua	5	292240 Mortierella_exigua	3.75071e-141	0.91	98.5849	0	0	0	5	0	0	0	0	0	0	0	0	0	0	0	0	0	0	0	0	0	0	0	0	0	0	0	0	0	0	0
>b20279	Otu01962	Saprotroph	TTAAGTTCAGCGGGTAGTCTTACTTGATTTGAGATCGAGTTTGACAGAGACAAAACCGTTGCCGGCCTTTTCTCTGTGAAATCCTGCATCAGTCAGCCATAATGGTCAAAACTCCCTTTATGTTAGCTGCAGCAAAAAGTAATAATCCGTTTGACGAGACTGTCCAGCTGCACTTTTAGTTCAAGCAACCCGCCGCAACAGATCTTAAAAGAAAAGGCGTTGGGTTTGCTCAAGTCCAAAACGCTTGAAAAAGATCAAGAGTTTTGAGGTGTTTACTGATACTCAAACAAGCATGCTCTTCGGAATACCAAAGAGCGCAATATGCGTTCAAAGATTCGATGACTCACTGAATTCTGCAATTCACATTACGTATCGCATTTCGCTGCGTTCTTCATCGAT…	JX975863	SH214063.07FU	410	Fungi	p__Mortierellomycota	c__Incertae_sedis	o__Mortierellales	f__Mortierellaceae	g__Mortierella	s__Mortierella_exigua	4	306831 Mortierella_exigua	7.46344e-136	0.91	98.0488	0	0	0	0	0	0	0	0	0	0	0	0	0	0	0	0	0	0	0	0	0	0	0	0	0	0	0	0	0	0	0
>c55967	Otu01982	Saprotroph	TTAAGTTCAGCGGGTAGTCTTACTTGATTTGAGATCGAGTTTGACAGAGACAAAACCGTTGCCGGCCTTTTCTCTGTGAAATCCTGCATCAGTCAGCCATAATGGTCAAAACTCCCTTTATGTTAGCTGCAGCAAAAAGTAATAATCCGTTTGACGGGACTAAATAAATATGCTTTTAACGCAACCCGCCGCAACAGATCTTAAAAGAAAAGGCGTTGGGTTTGCTCAAGTCCAAAACGCTTGAAAAAGATCAAGAGTTTTGAGGTGTTTACTGATACTCAAACAAGCATGCTCTTCGGAATACCAAAGAGCGCAATATGCGTTCAAAGATTCGATGATTCACTGAATTCTGCAATTCACATTACGTATCGCATTTCGCCACGTTCTTCATCGATGACG…	JX975863	SH214063.07FU	406	Fungi	p__Mortierellomycota	c__Incertae_sedis	o__Mortierellales	f__Mortierellaceae	g__Mortierella	s__Mortierella_exigua	3	306831 Mortierella_exigua	3.35628e-133	0.91	98.0296	0	0	0	0	0	0	0	0	0	0	0	0	0	0	0	0	0	0	0	0	0	0	0	0	0	0	0	0	0	0	0
>a112318	Otu02237	Saprotroph	TTAAGTTCAGCGGGTAGTCTTACTTGATTTGAGATCGAGTTTGACAGAGACAAAACCGTTGCCGGCCTTTTCTCTGTGAAATCCTGCATCAGTCAGCCATAATGGTCAAAACTCCCTTTATGTTAGCTGCAGCAAAAAGTAATAATCCGTTTGAGGGGACTATCTAGCTACACCTGCATTTCAAGCAACCCGCCGCAACAGATCTTAAAAGAAAAGGCGTTGGGTTTGCTCAAGTCCAAAACGCTTGAAAAAGATCAAGAGTTTTGAGGTGTTTACTGATACTCAAACAAGCATGCTCTTCGGAATACCAAAGAGCGCAATATGCGTTCAAAGATTCGATGATTCACTGAATTCTGCAATTCACATTACGTATCGCATTTCGCTGCGTTCTTCATCGAT…	JX975863	SH214063.07FU	410	Fungi	p__Mortierellomycota	c__Incertae_sedis	o__Mortierellales	f__Mortierellaceae	g__Mortierella	s__Mortierella_exigua	2	306831 Mortierella_exigua	1.6408e-138	0.92	98.0488	0	0	0	0	0	0	0	0	0	0	0	0	0	0	0	0	0	0	0	0	0	0	0	0	0	0	0	0	0	0	0
>c87653	Otu02657	Saprotroph	TTAAGTTCAGCGGGTAGTCTTACTTGATTTGAGATCGAGTTTGACAGAGACAAAACCGTTGCCGGCCTTTTCTCTGTGAAATCCTGCATCAGTCAGCCATAATGGTCAAAACTCCCTTTATGTTAGCTGCAGCAAAAAGTAATAATCCGATTGTCCGGCTGCACCTGCATTTCAAGCAACCCGCCGCAACAGATCTTAAAAGAAAAGGCGTTGGGTTTGCTCAAGTCCAAAACGCTTGAAAAAGATCAAGAGTTTTGAGGTGTTTACTGATACTCAAACAAGCATGCTCTTCGGAATACCAAAGAGCGCAATATGCGTTCAAAGATTCGATGATTCACTGAATTCTGCAATTCACATTACGTATCGCATTTCGCTGCGTTCTTCATCGGTGACGAGTCT…	JX975863	SH214063.07FU	401	Fungi	p__Mortierellomycota	c__Incertae_sedis	o__Mortierellales	f__Mortierellaceae	g__Mortierella	s__Mortierella_exigua	2	306831 Mortierella_exigua	1.89809e-127	0.9	98.005	0	0	0	0	0	0	0	0	0	0	0	0	0	0	0	0	0	0	0	0	0	0	0	0	0	0	0	0	0	0	0
>b41466	Otu02189	Saprotroph	TTAAGTTCAGCGGGTAGTCTTACTTGATTTGAGATCGAGATTCACAGTTTCTACTTTTTTAAAAAAAAAGCTTCCACTGATAAATTCCTGCATCAGTCAGCAAAATTGAACAATCAACCTTTATATAAGCTGCAGCAAAAAGTAATAATCCTAGCGGTTAAACCAAGGACTAAATAGATATGCTTTTAGCTCAGAAGAATGTTCAGCTGCACCTGAATTTCAAGTGACCTGCCAAAGGAGAAAAAATCTCTTTCGTTAGGATTACTCAAAACCAAATCTTTTTTTCTTCAAGAAAAAAAAAAGATTTGAGTGTTTTACTGATACTCAAACAAGCATGCTCTTCGGAATACCAAAGAGCGCAATATGCGTTCAAAGATTCGATGATTCACTGAATTCTGC…	JX975933	SH014915.07FU	452	Fungi	p__Mortierellomycota	c__Incertae_sedis	o__Mortierellales	f__Mortierellaceae	g__Mortierella	s__Mortierella_formicicola	6	318335 Mortierella_formicicola	4.37631e-118	0.86	98.2301	0	0	0	0	0	0	0	0	0	0	0	0	0	0	0	0	0	0	0	0	0	0	0	0	0	0	0	0	0	0	0
>a13792	Otu01327	Saprotroph	TTAAGTTCAGCGGGTAGTCTTACTTGATTTGAGATCGAGTTGAACAAGGATTTCTCCATGTTTTCCTGCATCAGTCGGGCACAGGACAATCAACCTTTATATTAGCTGTAGCAATAGAAATAATCCGTTTGACGGGACTAAATAGGTAATGCTTATAGCTCAGAAGATGTGTCCAGCCGCACCTGCATTTCAAGCAACCCGCCAGCCTTTTAAAAAAAACCGTTGGGATCACTCAAGTCCAGCCTTTTCAATAAAGAAAAGGTTGAGGGTGTTTTACTGATACTCAAACAAGCATGCTCTCCGGAATACCAGAGAGCGCAATGTGCGTTCAAAGATTCGATGATTCACTGAATTCTGCAATTCACATTACGTATCGCATTTCGCTGCGTTCTTCATCGA…	JN943800	SH185972.07FU	411	Fungi	p__Mortierellomycota	c__Incertae_sedis	o__Mortierellales	f__Mortierellaceae	g__Mortierella	s__Mortierella_globulifera	410	294714 Mortierella_globulifera	1.24058e-168	0.99	98.5401	0	0	0	0	0	0	0	0	0	0	0	0	0	0	0	0	0	0	0	0	0	0	0	0	0	0	0	0	0	0	0
>c84966	Otu02194	Saprotroph	TTAAGTTCAGCGGGTAGTCTTACTTGATTTGAGATCGAGTTGAACAAGGATTTCTCCATGTTTTCCTGCATCAGTCGGGCACAAGGACAATCGACCTTTATATTAGCTGTAGCAATAGAAATAATCCGTTTGACGGGACTAAATAGGTAATGCTTATAGCTCAGAAGATGTGTCCAGCCGCACCTGCATTTCAAGCAACCCGCCAGCTTTTTTTAAAAAAAACCGTTGGGATCACTCAAGTCCAGCTTTTTCAAAAGAGAAAAATCTGAGGGTGTTTTACTGATACTCAAACAAGCATGCTCTCCGGAATACCAGAGAGCGCAATGTGCGTTCAAAGATTCGATGATTCACTGAATTCTGCAATTCACATTACGTATCGCATTTCGCTGCGTTCTTCAT…	JN943800	SH185972.07FU	414	Fungi	p__Mortierellomycota	c__Incertae_sedis	o__Mortierellales	f__Mortierellaceae	g__Mortierella	s__Mortierella_globulifera	4	294714 Mortierella_globulifera	4.11897e-157	0.96	98.5507	0	0	0	0	0	0	0	0	0	0	0	0	0	0	0	0	0	0	0	0	0	0	0	0	0	0	0	0	0	0	0
>c90100	Otu02096	Saprotroph	TTAAGTTCAGCGGGTAGTCTTACTTGATTTGAGATCGAGTTGAACAACACATAAAGTGTCGTAAAATCCTGCATCAGTCAGCAAAGAGGACAATTATCCTTTATGTTAGCTGCAGCAAAAGTAATAATCCTGTTTGACGAGGACTAAATAGATATGCTTTTAGCTCAGATAAAAGTCCAGCTGCACCTGCATTTCCAGCCTCCCGGTTTTTTATCAAAAAAGAGAGGTTGAGGTGTTTACTGATACTCAAACAAGCATGCTCTTCGGAATACCAAAGAGCGCAATATGCGTTCAAAGATTCGATGATTCACTGAATTCTGCAATTCACATTACGTATCGCATTTCGCTGCGTTCTTCATCGATGACGAGTCTAG	JN943793	SH196779.07FU	374	Fungi	p__Mortierellomycota	c__Incertae_sedis	o__Mortierellales	f__Mortierellaceae	g__Mortierella	s__Mortierella_humilis	2	299731 Mortierella_humilis	3.1238e-102	0.86	98.3957	0	0	0	0	0	0	0	0	0	0	0	0	0	0	0	0	0	0	0	0	0	0	0	0	0	0	0	0	0	0	0
>a73922	Otu02377	Saprotroph	TTAAGTTCAGCGGGTAGTCTTACTTGATTTGAGATCGAGTTGAACAACACATAAAGTGTCGTAAAATCCTGCATCAGTCAGCAAAGAGGACAATTATCCTTTATGTTAGCTGCAGCAAAAGTAATAATCCTGTTTGACGAGGACTAAATAGATATGCTTTTAGCTCAGATAAAAGTCGTGGGGATAGCTCAAGTCCACCCTCCCTTTTTTTTATCAAAAAAGAGAGGTTGAGGTGTTTACTGATACTCAAACAAGCATGCTCTTCGGAATACCAAAGAGCGCAATATGCGTTCAAAGATTCGATGATTCACTGAATTCTGCAATTCACATTACGTATCGCATTTCGCTGCGTTCTTCATCGGTGACGAGTCTAG	JN943793	SH196779.07FU	374	Fungi	p__Mortierellomycota	c__Incertae_sedis	o__Mortierellales	f__Mortierellaceae	g__Mortierella	s__Mortierella_humilis	2	299731 Mortierella_humilis	3.82269e-95	0.85	98.3957	0	0	0	0	0	0	0	0	0	0	0	0	0	0	0	0	0	0	0	0	0	0	0	0	0	0	0	0	0	0	0
>b123265	Otu01770	Saprotroph	TTAAGTTCAGCGGGTAGTCTTACTTGATTTGAGATCGAGTTTTCAAAGGTCGTTTTACGGAGCTCTGAGAAATCCTGCATCAGTCAGCACAATGACCATTTCTTCCTTTTAAAGGTAAGCCGCAGCAAATAAAGTGAATAATCCGTTTTACGGGATTAACTAGATAATGCTTTTAGCCCAGAAGAATGATCGGCTGCACCTGCATTTGAAGCAACCCTCCATATAATAAAATATACGTTGGGATTTGCTCAAGTCCAATTTCAAAAAAAAGATTGTGAAATTGAGGTGTTTACTGATACTCAAACAAGCATGCTCTCCGGAATACCAGAGAGCGCAATGTGCGTTCAAAGATTCGATGATTCACTGAATTCTGCAATTCACATTACGTATCGCATTTCG…	HQ630302	SH196185.07FU	427	Fungi	p__Mortierellomycota	c__Incertae_sedis	o__Mortierellales	f__Mortierellaceae	g__Mortierella	s__Mortierella_hypsicladia	30	299437 Mortierella_hypsicladia	1.25805e-164	0.97	97.1897	0	0	0	0	0	0	0	0	0	0	0	0	0	0	0	0	0	0	0	0	0	0	0	0	0	0	0	0	0	0	0
>a9	Otu01224	Saprotroph	TTAAGTTCAGCGGGTAGTCTTACTTGATTTGAGATCGAGTTGAACAACACATAAAGTGTCGTAAAATCCTGCATCAGTCAGCAAAGAGGACAATTATCCTTTATGTTAGCTGCAGCAAAAGTAATAATCCTGTTTGACGAGGACTAAATAGATATGCTTTTAGCTCAGATAAAAGTCCAGCTGCACCTGCATTTCAAGCCGCCCGCCTACCGGTGAAGGTCGTTGGGATAGCTCAAGTCCACCCTCCCTTTTTTTTATCAAAAAAGAGAGGTTGAGGTGTTTACTGATACTCAAACAAGCATGCTCTTCGGAATACCAAAGAGCGCAATATGCGTTCAAAGATTCGATGATTCACTGAATTCTGCAATTCACATTACGTATCGCATTTCGCTGCGTTCT…	HQ630323	SH196780.07FU	418	Fungi	p__Mortierellomycota	c__Incertae_sedis	o__Mortierellales	f__Mortierellaceae	g__Mortierella	s__Mortierella_minutissima	20226	299732 Mortierella_minutissima	4.56217e-169	0.99	97.1292	0	3	5	7	4	0	2	3	2	5	3	4	8	2	3	4	3	3	5	4	9	9	33	0	3	0	2	0	0	0	0
>a75216	Otu01502	Saprotroph	TTAAGTTCAGCGGGTAGTCTTACTTGATTTGAGATCGAGTTGAACAACACATAAAGTGTCGTAAAATCCTGCATCAGTCAGCAAAGAGGACAATTATCCTTTATGTTAGCTGCAGCAAAAGTAATAATCCTGTTTGACGAGGACTAAATAGATATGCTTTTAGCTCAGATAAATTTCCAGCCGCCCGCCTACCGGTGAAGGTCGTTGGGATAGCTCAAGTCCACCCTCCCTTTTTTTTATCAAAAAAGAGAGGTTGAGGTGTTTACTGATACTCAAACAAGCATGCTCTTCGGAATACCAAAGAGCGCAATATGCGTTCAAAGATTCGATGATTCACTGAATTCTGCAATTCACATTACGTATCGCATTTCGCTACGTTCTTCATCGATGACGAGTCTAG	HQ630323	SH196780.07FU	400	Fungi	p__Mortierellomycota	c__Incertae_sedis	o__Mortierellales	f__Mortierellaceae	g__Mortierella	s__Mortierella_minutissima	76	299732 Mortierella_minutissima	5.92566e-143	0.94	97	0	0	0	0	0	0	0	0	0	0	0	0	0	0	0	0	0	0	0	0	0	0	0	0	0	0	0	0	0	0	0
>b64950	Otu01645	Saprotroph	TTAAGTTCAGCGGGTAGTCTTACTTGATTTGAGATCGAGTTGAACAACACATAAAGTGTCGTAAAATCCTGCATCAGTCAGCAAAGAGGACAATTATCCTTTATGTTAGCTGCAGCAAAAGTAATAATCCTGTTTGACGAGGACTAAATAGATAAGCTTCCAGCTCCACTTGCATTTCAAGCCGCCCGCCTACCGGTGAAGGTCGTTGGGATAGCTCAAGTCCACCCTCCCTTTTTTTTATCAAAAAAGAGAGGTTGAGGTGTTTACTGATACTCAAACAAGCATGCTCTTCGGAATACCAAAGAGCGCAATATGCGTTCAAAGATTCGATGATTCACTGAATTCTGCAATTCACATTACGTATCGCATTTCGCTGCGTTCTTCATCGTTGACG	HQ630323	SH196780.07FU	394	Fungi	p__Mortierellomycota	c__Incertae_sedis	o__Mortierellales	f__Mortierellaceae	g__Mortierella	s__Mortierella_minutissima	18	299732 Mortierella_minutissima	1.61447e-142	0.95	97.4619	0	0	0	0	0	0	0	0	0	0	0	0	0	0	0	0	0	0	0	0	0	0	0	0	0	0	0	0	0	0	0
>c150117	Otu01717	Saprotroph	TTAAGTTCAGCGGGTAGTCTTACTTGATTTGAGATCGAGTTGAACAACACATAAAGTGTCGTAAAATCCTGCATCAGTCAGCAAAGAGGACAATTATCCTTTATGTTAGCTGCAGCAAAAGTAATAATCCTGTTTGACGAGGACTAAATAGATATGCTTTTAGCTCAGATAAAAGTCCAGTTGCACCCGCCCGCCTACCGGTGAAGGTCGTTGGGATAGCTCAAGTCCACCCTCCCTTTTTTTTATCAAAAAAGAGAGGTTGAGGTGTTTACTGATACTCAAACAAGCATGCTCTTCGGAATACCAAAGAGCGCAATATGCGTTCAAAGATTCGATGATTCACTGAATTCTGCAATTCACATTACGTATCGCATTTCGCCACGTTCTTCATCGATGACG…	HQ630323	SH196780.07FU	406	Fungi	p__Mortierellomycota	c__Incertae_sedis	o__Mortierellales	f__Mortierellaceae	g__Mortierella	s__Mortierella_minutissima	16	299732 Mortierella_minutissima	4.92724e-150	0.96	97.0443	0	0	0	0	0	0	0	0	0	0	0	0	0	0	0	0	0	0	0	0	0	0	0	0	0	0	0	0	0	0	0
>c25619	Otu01828	Saprotroph	TTAAGTTCAGCGGGTAGTCTTACTTGATTTGAGATCGAGTTGAACAACACATAAAGTGTCGTAAAATCCTGCATCAGTCAGCAAAGAGGACAATTATCCTTTATGTTAGCTGCAGCAAAAGTAATAATCCTGTTTGACGAGGACTAAATAGATATGCATTTCACGCCGCCCGCCTACCGGTGAAGGTCGTTGGGATAGCTCAAGTCCACCCTCCCTTTTTTTTATCAAAAAAGAGAGGTTGAGGTGTTTACTGATACTCAAACAAGCATGCTCTTCGGAATACCAAAGAGCGCAATATGCGTTCAAAGATTCGATGATTCACTGAATTCTGCAATTCACATTACGTATCGCATTTCGCCACGTTCTTCATCGATGACGAGTCTAG	HQ630323	SH196780.07FU	385	Fungi	p__Mortierellomycota	c__Incertae_sedis	o__Mortierellales	f__Mortierellaceae	g__Mortierella	s__Mortierella_minutissima	9	299732 Mortierella_minutissima	3.744e-122	0.9	96.8831	0	0	0	0	0	0	0	0	0	0	0	0	0	0	0	0	0	0	0	0	0	0	0	0	0	0	0	0	0	0	0
>c1858	Otu02090	Saprotroph	TTAAGTTCAGCGGGTAGTCTTACTTGATTTGAGATCGAGTTGAACAACACATAAAGTGTCGTAAAATCCTGCATCAGTCAGCAAAGAGGACAATTATCCTTTATGTTAGCTGCAGCAAAAGTAATAATCCTGTTTGACGAGGACTAAATAGATATGCTTTTAGCTCAGATTACAATCCACCCGCCTACCGGTGAAGGTCGTTGGGATAGCTCAAGTCCACCCTCCCTTTTTTTTATCAAAAAAGAGAGGTTGAGGTGTTTACTGATACTCAAACAAGCATGCTCTTCGGAATACCAAAGAGCGCAATATGCGTTCAAAGATTCGATGATTCACTGAATTCTGCAATTCACATTACGTATCGCATTTCGCTGCGTTCTTCATCGTTGACGAGTCTAG	HQ630323	SH196780.07FU	396	Fungi	p__Mortierellomycota	c__Incertae_sedis	o__Mortierellales	f__Mortierellaceae	g__Mortierella	s__Mortierella_minutissima	4	299732 Mortierella_minutissima	7.1666e-136	0.93	96.9697	0	0	0	0	0	0	0	0	0	0	0	0	0	0	0	0	0	0	0	0	0	0	0	0	0	0	0	0	0	0	0
>b93973	Otu00151	Saprotroph	TTAAGTTCAGCGGGTAGTCTTACTTGATTTGAGATCGAGTTGAACAACACATAAAGTGTCGTAAAATCCTGCATCAGTCAGCAAAGAGGACAATTATCCTTTATGTTAGCTGCAGCAAAAGTAATAATCCTGTTTGACGAGGACTAAATAGATATGCTTTTAGCTCAGATAAAAGTCCAGCTGCACCTGCATTTCAAGCCGCCCGCCTACCGGTGAAGGTCGTTGGGATAGCTCAAGTCCACCCTCCCTTTTTTTTATCAAAAAAGAGAGGTTGAGGTGTTTACTGACACTGATACAAGCATACT	HQ630323	SH196780.07FU	305	Fungi	p__Mortierellomycota	c__Incertae_sedis	o__Mortierellales	f__Mortierellaceae	g__Mortierella	s__Mortierella_minutissima	2	299732 Mortierella_minutissima	1.29372e-119	0.98	97.7049	0	0	0	0	0	0	0	0	0	0	0	0	0	0	0	0	0	0	0	0	0	0	0	0	0	0	0	0	0	0	0
>a20346	Otu01904	Saprotroph	TTAAGTTCTGCGGGTAGTCTTACTTGATTTGAGATCGAGTTGAACAACACATAAAGTGTCGTAAAATCCTGCATCAGTCAGCAAAGAGGACAATTATCCTTTATGTTAGCTGCAGCAAAAGTCCAGCTGCACCTGCATTTCAAGCCGCCCGCCTACCGGTGAAGGTCGTTGGGATAGCTCAAGTCCACCCTCCCTTTTTTTTATCAAAAAAGAGAGGTTGAGGTGTTTACTGATACTCAAACAAGCATGCTCTTCGGAATACCAAAGAGCGCAATATGCGTTCAAAGATTCGATGATTCACTGAATTCTGCAATTCACATTACGTATCGCATTTCGCTGCGTTCTTCATCGATGACGAGTCTAG	HQ630323	SH196780.07FU	364	Fungi	p__Mortierellomycota	c__Incertae_sedis	o__Mortierellales	f__Mortierellaceae	g__Mortierella	s__Mortierella_minutissima	2	299732 Mortierella_minutissima	8.1389e-98	0.95	75	0	0	0	0	0	0	0	0	0	0	0	0	0	0	0	0	0	0	0	0	0	0	0	0	0	0	0	0	0	0	0
>a44551	Otu02127	Saprotroph	TTAAGTTCAGCGGGTAGTCTTACTTGATTTGAGATCGAGTTGAACAACACATAAAGTGTCGTAAAATCCTGCATCAGTCAGCAAAGAGGACAATTATCCTTTATGATAGCTGCAGCAAAAGTAATAATCCTGTTTGACGAGGACTAAATAGATATGCTTTTAGCTCAGATGAACGTGCATCTCAAGCCGCCCGCCTACCGGTGAAGGTCGTTGGGATAGCTCAAGTCCACCCTCCCTTTTTTTTATCAAAAAAGAGAGGTTGAGGTGTTTACTGATACTCAAACAAGCATGCTCTTCGGAATACCAAAGAGCGCAATATGCGTTCAAAGATTCGATGATTCACTGAATTCTGCAATTCACATTACGTATCGCATTTCGCTGCGTTCTTCATCGATGACG…	HQ630323	SH196780.07FU	406	Fungi	p__Mortierellomycota	c__Incertae_sedis	o__Mortierellales	f__Mortierellaceae	g__Mortierella	s__Mortierella_minutissima	2	299732 Mortierella_minutissima	3.78935e-149	0.95	97.0443	0	0	0	0	0	0	0	0	0	0	0	0	0	0	0	0	0	0	0	0	0	0	0	0	0	0	0	0	0	0	0
>b62997	Otu02197	Saprotroph	TTAAGTTCAGCGGGTAGTCTTACTTGATTTGAGATCGAGTTGAACAACACATAAAGTGTCGTAAAATCCTGCATCAGTCAGCAAAGAGGACAATTATCCTTTATGTTAGTTGCAGCAAAAGTAATAATCCTGTTCGACGAGGACTAAATAGATATGCTTTTAGCTCAGATAAAAGTCCAGCTGTTCAAGCAGCCCGCCTACCGGTGAAGGTCGTTGGGATAGCTCAAGTCCACCCTCCCTTTTTTTTATCAAAAAAGAGAGGTTGAGGTGTTTACTGATACTCAAACAAGCATGCTCTTCGGAATACTAAAGAGCGCAATATGCGTTCAAAGATTCGATGATTCACTGAATTCTGCAATTCACATTACGTATCGCATTTCGCTGCGTTCTTCATCGATG…	HQ630323	SH196780.07FU	409	Fungi	p__Mortierellomycota	c__Incertae_sedis	o__Mortierellales	f__Mortierellaceae	g__Mortierella	s__Mortierella_minutissima	2	299732 Mortierella_minutissima	3.93975e-153	0.96	97.066	0	0	0	0	0	0	0	0	0	0	0	0	0	0	0	0	0	0	0	0	0	0	0	0	0	0	0	0	0	0	0
>a59307	Otu02333	Saprotroph	TTTTAGCTCAGATAAAAGTCCAGCTGCACCTGCATTTCAAGCCGCCCGCCTACCGGTGAAGGTCGTTGGGATAGCTCAAGTCCACCCTCCCTTTTTTTTATCAAAAAAGAGAGGTTGAGGTGTTTACTGATACTCAAACAAGCATGCTCTTCGGAATACCAAAGAGCGCAATATGCGTTCAAAGATTCGATGATTCACTGAATTCTGCAATTCACATTACGTATCGCATTTCGCTGCGTTCTTCATCGTTGACGAGTCTAG	HQ630323	SH196780.07FU	261	Fungi	p__Mortierellomycota	c__Incertae_sedis	o__Mortierellales	f__Mortierellaceae	g__Mortierella	s__Mortierella_minutissima	2	299732 Mortierella_minutissima	1.55617e-101	0.99	97.7011	0	0	0	0	0	0	0	0	0	0	0	0	0	0	0	0	0	0	0	0	0	0	0	0	0	0	0	0	0	0	0
>b86886	Otu02357	Saprotroph	TTAAGTTCAGCGGGTAGTCTTACTTGATTTGAGATCGAGTTGAACAACACATAAAGTGTCGTAAAATCCTGCATCAGTCAGCAAAGAGGACAATTATCCTTTATGTTAGCTGCAGCAAAAGTAATAATCCTGTTTGACGAGGACTAAATAGATATGCTTTTAGCTCAGATAAAAGTCCAGCTGCACCTGCATTTCAAGCCGCCCGCTTACCGGGAAAGCTCAAGTCCACCCTCCCTTTTTTTTATCAAAAAAGAGAGGTTGAGGTGTTTACTGATACTCAAACAAGCATGCTCTTCGGAATACCAAAGAGCGCAATATGCGTTCAAAGATTCGATGATTCACTGAATTCTGCAATTCACATTACGTATCGCATTTCGCTGCGTTCTTCATCGTTGACGA…	HQ630323	SH196780.07FU	405	Fungi	p__Mortierellomycota	c__Incertae_sedis	o__Mortierellales	f__Mortierellaceae	g__Mortierella	s__Mortierella_minutissima	2	299732 Mortierella_minutissima	3.77846e-149	0.96	97.037	0	0	0	0	0	0	0	0	0	0	0	0	0	0	0	0	0	0	0	0	0	0	0	0	0	0	0	0	0	0	0
>a1563	Otu02441	Saprotroph	TTAAGTTCAGCGGGTAGTCTTACTTGATTTGAGATCGAGTTGAACAACACATAAAGTGTCGTAAAATCCTGCATCAGTCAGCAAAGAGGACAATTATCCTTTATGTTAGCTGCAGCAAAAGTAATAATCCTGTTAGCTGAGATCAAAATCCAGCTGCACCTGCATTTCAAGCCGCCCGCCTACCGGTGAAGGTCGTTGGGATAGCTCAAGTCCACCCTCCCTTTTTTTTATCAAAAAAGAGAGGTTGAGGTGTTTACTGATACTCAAACAAGCATGCTCTTCGGAATACCAAAGAGCGCAATATGCGTTCAAAGATTCGATGATTCACTGAATTCTGCAATTCACATTACGTATCGCATTTCGCTGCGTTCTTCATCGGTGACGAGTCTAG	HQ630323	SH196780.07FU	391	Fungi	p__Mortierellomycota	c__Incertae_sedis	o__Mortierellales	f__Mortierellaceae	g__Mortierella	s__Mortierella_minutissima	2	299732 Mortierella_minutissima	3.11563e-129	0.92	96.9309	0	0	0	0	0	0	0	0	0	0	0	0	0	0	0	0	0	0	0	0	0	0	0	0	0	0	0	0	0	0	0
>c22891	Otu02664	Saprotroph	TTAAGTTCAGCGGGTAGTCTTACTTGATTTGAGATCGAGTTGAACAACACATAAAGTGTCGTAAAATCCTGCATCAGTCAGCAAAGAGGACAATTATCCTTTATGTTAGCTGCAGCAAAAGTAATAATCCTGTTTGACGAGGACTAAATAGATATGCTTTTAGCTCAGATAAAAGTCCAGCTGCGCCTACCGTTCAAGCTCGTTGGGATAGCTCAAGTCCACCCTCCCTTTTTTTTATCAAAAAAGAGAGGTTGAGGTGTTTACTGATACTCAAACAAGCATGCTCTTCGGAATACCAAAGAGCGCAATATGCGTTCAAAGATTCGATGATTCACTGAATTCTGCAATTCACATTACGTATCGCATTTCGCTGCGTTCTTCATCGGTGACGAGTCTAG	HQ630323	SH196780.07FU	398	Fungi	p__Mortierellomycota	c__Incertae_sedis	o__Mortierellales	f__Mortierellaceae	g__Mortierella	s__Mortierella_minutissima	2	299732 Mortierella_minutissima	1.58487e-138	0.93	96.9849	0	0	0	0	0	0	0	0	0	0	0	0	0	0	0	0	0	0	0	0	0	0	0	0	0	0	0	0	0	0	0
>b12508	Otu02671	Saprotroph	TTAAGTTCAGCGGGTAGTCTTACTTGATTTGAGATCGAGTTGAACAACACATAAAGTGTCGTAAAATCCTGCATCAGTCAGCAAAGAGGACAATTATCCTTTATGTTAGCTGCAGCAAAAGTAATAATCCTGTTTGACGAGGACTAAATAGATATGCTTTTAGCTCAGATAACAGCCCGCCTGCAGGTGAAGGTCGTTGGGATAGCTCAAGTCCACCCTCCCTTTTTTTTATCAAAAAAGAGAGGTTGAGGTGTTTACTGATACTCAAACAAGCATGCTCTTCGGAATACCAAAGAGCGCAATATGCGTTCAAAGATTCGATGATTCACTGAATTCTGCAATTCACATTACGTATCGCATTTCGCCACGTTCTTCATCGATGACGAGTCTAG	HQ630323	SH196780.07FU	392	Fungi	p__Mortierellomycota	c__Incertae_sedis	o__Mortierellales	f__Mortierellaceae	g__Mortierella	s__Mortierella_minutissima	2	299732 Mortierella_minutissima	4.06338e-130	0.92	96.9388	0	0	0	0	0	0	0	0	0	0	0	0	0	0	0	0	0	0	0	0	0	0	0	0	0	0	0	0	0	0	0
>a109865	Otu03321	Saprotroph	TTAAGTTCAGCGGGTAGTCTTACTTGATTTGAGATCGAGTTGAACAACACATAAAGTGTCGTAAAATCCTGCATCAGTCAGCAAAGAGGACAATTATCCTTTATGTTAGCTGCAGCCACACTACTCCTCCTGTTTTACTCTTCCTCCCTCTCTCTTCTTTTCGCTCCGCTCCCCGTCCCGCTGCCCCTGCCTTTCCCGCCGCCCGCCTCCCGGTGAAGGTCGTTGGGATAGCTCAAGTCCACCCTACCTTTTTTTTATCAAAAAAGAGAGGTTGAGGTGTTTACTGATACTCAAACAAGCATGCTCTTCGGAATACCAAAGAGCGCAATATGCGTTCAAAGATTCGATGATTCACTGAATTCTGCAATTCACATTACGTATCGCATTTCGCTGCGTTCT…	HQ630323	SH196780.07FU	418	Fungi	p__Mortierellomycota	c__Incertae_sedis	o__Mortierellales	f__Mortierellaceae	g__Mortierella	s__Mortierella_minutissima	2	299732 Mortierella_minutissima	4.65369e-138	0.91	97.1292	0	0	0	0	0	0	0	0	0	0	0	0	0	0	0	0	0	0	0	0	0	0	0	0	0	0	0	0	0	0	0
>b80440	Otu04423	Saprotroph	TTAAGTTCAGCGGGTAGTCTTACTTGATTTGAGATCGAGTTGAACAACACATAAAGTGTCGTAAAATCCTGCATCAGTCAGCAAAGAGGACAATTATCCTTTATGTTAGCTGCAGCAACATTTATAGTCCTCCGCCTACCGGTGAAGGTCGTTGGGATAGCTCAAGTCCACCCTCCCTTTTTTTTATCAAAAAAGAGAGGTTGAGGTGTTTACTGATACTCAAACAAGCATGCTCTTCGGAATACCAAAGAGCGCAATATGCGTTCAAAGATTCGATGATTCACTGAATTCTGCAATTCACATTACGTATCGCATTTCGCTGCGTTCTTCATCGTTGACGAGTCTAG	HQ630323	SH196780.07FU	347	Fungi	p__Mortierellomycota	c__Incertae_sedis	o__Mortierellales	f__Mortierellaceae	g__Mortierella	s__Mortierella_minutissima	2	299732 Mortierella_minutissima	5.39829e-85	0.95	67.4352	0	0	0	0	0	0	0	0	0	0	0	0	0	0	0	0	0	0	0	0	0	0	0	0	0	0	0	0	0	0	0
>a110732	Otu01782	Saprotroph	TTAAGTTCAGCGGGTAGTCTTACTTGATTTGAGATCGAGTTTTCAAAAGTCCTTACAGACCTCTGAGAATTCCTGCATCAGTCAGCACAATGGCCATTTCTTCCTTTTATAAAGGTAAGCTGCAGCAATAAAGTGAATAATCCGTTTTACGGGATTAACTAGATAATGCTTTTAGCCCAGAAGAATGATCGGCTGCACCTGCATTTGAAGCAACCCTCCATATAATTAAATGTACGTTGGGATCTGCTCAAGTCCAATTTCAAAATTAAGAATCATGAAATTGAGGTGTTTACTGATACTCAAACAAGCATGCTCTCCGGAATACCAGAGAGCGCAATGTGCGTTCAAAGATTCGATGATTCACTGAATTCTGCAATTCACATTACGTATCGCATTTCG…	HQ630301	SH103825.07FU	427	Fungi	p__Mortierellomycota	c__Incertae_sedis	o__Mortierellales	f__Mortierellaceae	g__Mortierella	s__Mortierella_polygonia	21	311269 Mortierella_polygonia	3.70708e-172	0.99	97.1897	0	0	0	0	0	0	0	0	0	0	0	0	0	0	0	0	0	0	0	0	0	0	0	0	0	0	0	0	0	0	0
>a5271	Otu01225	Saprotroph	TTAAGTTCAGCGGGTAGTCTTACTTGATTTGAGATCGAGTTTACAAAGTCAGCCGCGAAGCTGTCTCTGTGAATCCTGCATCAGTCAGCACAAGAACTCATCTCCTTTATGTTAGCTGCAGCAAAGGTAATAATCTGTTTTTTAGGCAGACTAAATAGATATGCTTATAGCTCAGAGAAAAGTCCAGCTGCACCTGCATTTCAAGTGACCCGCCACTTTTCAGTGAAGAAAAGTGTTGGGATCACTCAAGTCCAGCTCCCTCATTTCAAAAAAGAAAAGAGGGAGTTGAGGTGTTTACTGATACTCAAACAAGCATGCTCTCCGGAATACCAGAGAGCGCAATATGCGTTCAAAGATTCGATGATTCACTGAATTCTGCAATTCACATTACGTATCGCA…	DQ420854	SH183635.07FU	432	Fungi	p__Mortierellomycota	c__Incertae_sedis	o__Mortierellales	f__Mortierellaceae	g__Mortierella	s__Mortierella_sp	10556	293681 Mortierella_sp	1.76172e-173	0.99	98.6111	0	7	8	0	0	6	3	5	6	4	6	20	6	7	0	6	9	0	6	7	5	8	39	3	2	4	4	0	0	2	0
>a175	Otu01232	Saprotroph	TTAAGTTCAGCGGGTAGTCTTACTTGATTTGAGATCGAGTTTAACAAGAATCGTTGCCGACCCTTGTGAAATCCTGCATCAGTCAGCCAATACGGTCAAACTCCCTTTATGTTAGCTGCAGCAAAAGTAATAATCCGTTTGACGGGACTAAATGAATATGCTTTTAGCTCAGGAGAATGTCCAGCTGCACCTGCATTTCAAGCAACCCGCCACCGATCTCAAAAAGATTGGTGTTGGGATTGCTCAAGTCCAAAGCTTTTCGATTAAAAAATCCAAAAGCTTTGAGGTGTTTACTGATACTCAAACAAGCATGCTCTTCGGAATACCAAAGAGCGCAATATGCGTTCAAAGATTCGATGATTCACTGAATTCTGCAATTCACATTACGTATCGCATTTC…	HM240131	SH003980.07FU	428	Fungi	p__Mortierellomycota	c__Incertae_sedis	o__Mortierellales	f__Mortierellaceae	g__Mortierella	s__Mortierella_sp	5126	313402 Mortierella_sp	3.83164e-176	0.99	98.5981	9	50	27	8	3	5	7	20	27	2	6	95	8	3	46	6	20	42	2	9	7	3	33	5	0	0	0	0	7	2	0
>a5793	Otu01237	Saprotroph	TTAAGTTCAGCGGGTAGTCTTACTTGATTTGAGATCGAGTTTAACAAGAATCGTTGCCGACCCTTGTAAAATCCTGCATCAGTCAGCCAATACGGTCAAACTCCCTTTATGTTAGCTGCAGCAAAAGTAATAATCCGTTTGACGGGACTAAATGAATATGCTTTTAGCTCAGGAGAAAGTCCAGCTGCACCTGCATTTCAAGCAACCCGCCGCCGATCTGAAAAAGATTGGCGTTGGGATTGCTCAAGTCCAAAGCTTTCAAAAAAAATCCAAAAGCTTTGAGGTGTTTACTGATACTCAAACAAGCATGCTCTTCGGAATACCAAAGAGCGCAATATGCGTTCAAAGATTCGATGATTCACTGAATTCTGCAATTCACATTACGTATCGCATTTCGCT…	FN391349	SH180140.07FU	425	Fungi	p__Mortierellomycota	c__Incertae_sedis	o__Mortierellales	f__Mortierellaceae	g__Mortierella	s__Mortierella_sp	2996	292242 Mortierella_sp	3.57681e-168	0.98	98.5882	6	2	5	0	2	0	2	0	3	0	4	5	3	0	4	2	3	4	0	4	0	0	8	0	0	4	2	0	0	0	0
>a7658	Otu01239	Saprotroph	TTAAGTTCAGCGGGTAGTCTTACTTGATTTGAGATCGAGTTTAACAAGAGGTTTTGAAGACTCTTGTGAAAATCCTGCATCAGTCAGCCAAAATGGTCAAACTCCCTTTATATTAGCTGCAGCAAAAGTAATAATCCGTTTGACGGGACTAAATGAATATGCTTTTAGCTCAGGAGAATGTCCAGCTGCACCTGCATTTCAAGCAACCCGCCCCCTCTCTTTAAAAGATTGGTGTTGGGATTGCTCAAGTCCAAAGCCTTTCTTCAAAAAAGAAAAAAGGCTTTGAGGTGTTTACTGATACTCAAACAAGCATGCTCTTCGGAATACCAAAGAGCGCAATATGCGTTCAAAGATTCGATGATTCACTGAATTCTGCAATTCACATTACGTATCGCATTT…	AY842393	SH180112.07FU	429	Fungi	p__Mortierellomycota	c__Incertae_sedis	o__Mortierellales	f__Mortierellaceae	g__Mortierella	s__Mortierella_sp	2514	292214 Mortierella_sp_04M_158	1.3854e-176	0.99	98.6014	0	0	0	5	3	0	0	2	0	0	2	4	3	2	0	0	0	0	2	5	0	0	5	0	3	0	0	0	0	0	0
>a1306	Otu01241	Saprotroph	TTAAGTTCAGCGGGTAGTCTTACTTGATTTGAGATCGAGTTTAACAAGAATCGTTGCCGACCCTTGTAAAATCCTGCATCAGTCAGCCAATGCGGTCAAACTCCCTTTATGTTAGCTGCAGCAAAAGTAATAATCCGTTTGACGGGACTAAATGAATATGCTTTTAGCTCAGGAGAATGTCCAGCTGCACCTGCATTTCAAGCAACCCGCCGCCGATCTGAAAAAGATTGGTGTTGGGATTGCTCAAGTCCAAAACTTTCAAAAAAAATCCAAAAGCTTTGAGGTGTTTACTGATACTCAAACAAGCATGCTCTTCGGAATACCAAAGAGCGCAATATGCGTTCAAAGATTCGATGATTCACTGAATTCTGCAATTCACATTACGTATCGCATTTCGCT…	FN391349	SH180140.07FU	425	Fungi	p__Mortierellomycota	c__Incertae_sedis	o__Mortierellales	f__Mortierellaceae	g__Mortierella	s__Mortierella_sp	2108	292242 Mortierella_sp	3.57681e-168	0.98	98.5882	7	5	6	8	3	0	3	0	5	0	4	3	9	7	4	0	2	3	3	0	0	0	7	0	0	2	0	0	3	0	0
>a62097	Otu01251	Saprotroph	TTAAGTTCAGCGGGTAGTCTTACTTGATTTGAGATCGAGTTTTACAAGAATCGTTGCCGACCCTTGTGAAATCCTGCATCAGTCAGCCAATACGGTCAAACTCCCTTTATGTTAGCTGCAGCAAAAGTAATAATCCGTTTGACGGGACTAAATAAATATGCTTTTAGCTCAGGAGAATGTCCAGCTGCACCTGCATTTCAAGCAACCCTCCACCGATCGTAAAGACTGGTGTTGGGATTGCTCAAGTCCAAAGCCATTCAAAACAAATTGAAGTCTTTGAGGTGTTTACTGATACTCAAACAAGCATGCTCTTCGGAATACCAAAGAGCGCAATATGCGTTCAAAGATTCGATGATTCACTGAATTCTGCAATTCACATTACGTATCGCATTTCGCTGC…	AB520500	SH180111.07FU	423	Fungi	p__Mortierellomycota	c__Incertae_sedis	o__Mortierellales	f__Mortierellaceae	g__Mortierella	s__Mortierella_sp	1361	292213 Mortierella_sp	4.76802e-173	0.99	98.5816	0	2	2	0	0	0	0	0	0	0	2	3	0	0	0	0	0	0	0	2	0	0	0	0	0	0	0	2	0	0	0
>a11996	Otu01253	Saprotroph	TTAAGTTCAGCGGGTAGTCTTACTTGATTTGAGATCGAGTTTTACAAGAATCGTTGCCGACCCTTGTGAAATCCTGCATCAGTCAGCCAATACGGTCAAACTCCCTTTATATTAGCTGCAGCAAAAGTAATAATCCGTTTGACGGGACTAAATAAATATGCTTTTAGCTCAGGAGAATGTCCAGCTGCACCTGCATTTCAAGCAACCCGCCGCCGATCTGAAAAAGATTGGTGTTGGGATTGCTCAAGTCCAAAACTTTTAAAAAAAATCAAAAGCTTTGAGGTGTTTACTGATACTCAAACAAGCATGCTCTTCGGAATACCAAAGAGCGCAATATGCGTTCAAAGATTCGATGATTCACTGAATTCTGCAATTCACATTACGTATCGCATTTCGCTG…	HQ445990	SH180130.07FU	424	Fungi	p__Mortierellomycota	c__Incertae_sedis	o__Mortierellales	f__Mortierellaceae	g__Mortierella	s__Mortierella_sp	1210	292232 Mortierella_sp	3.56706e-168	0.98	98.5849	0	0	0	2	0	0	0	0	0	2	0	8	5	2	0	0	2	0	5	6	0	2	3	0	0	0	0	0	0	0	0
>a25458	Otu01264	Saprotroph	TTAAGTTCAGCGGGTAGTCTTACTTGATTTGAGATCGAGTTTAACAAGAATCGTTGCCGACCCTTGTGAAATCCTGCATCAGTCAGCCAAAACGGCCAAACTCCCTTTATATTAGCTGCAGCAAAAGTAATAATCCGTTTGACGGGACTAAATAAATATGCTTTTAGCTCAGGAGAATGTCCAGCTGCACCTGCATTTCAAGCAACCCGCCGCCGATCTTAAAAGATTGGTGTTGGGATCGCTCAAGTCCAAAGCCTTCAAAATAAATCAAAAGCTTTGAGGTGTTTACTGATACTCAAACAAGCATGCTCTTCGGAATACCAAAGAGCGCAATATGCGTTCAAAGATTCGATGATTCACTGAATTCTGCAATTCACATTACGTATCGCATTTCGCTGC…	KC965180	SH180116.07FU	423	Fungi	p__Mortierellomycota	c__Incertae_sedis	o__Mortierellales	f__Mortierellaceae	g__Mortierella	s__Mortierella_sp	866	292218 Mortierella_sp	2.82007e-171	0.99	98.5816	0	0	0	0	0	0	0	0	0	0	0	0	0	0	0	0	0	0	0	0	0	0	0	0	0	0	0	0	0	0	0
>a21154	Otu01297	Saprotroph	TTAAGTTCAGCGGGTAGTCTTACTTGATTTGAGATCGAGTTTTACAAGAATCGTTGCCGACCCTTGTGAAATCCTGCATCAGTCAGCCAAAACGGTCAAACTCCCTTTATATTAGCTGCAGCAAAAGTAATAATCCGTTTGACGGGACTAAATAAATATGCTTTTAGCTCAGGAGAATGTCCAGCTGCACCTGCATTTCAAGCAACCCGCCGCCAATCTAAAAGATTGGTGTTGGGATTGCTCAAGTCCAAAACTTTTTTTTTTAAAAAAAATAAAAAATTTTGAGGTGTTTACTGATACTCAAACAAGCATGCTCTTCGGAATACCAAAGAGCGCAATATGCGTTCAAAGATTCGATGATTCACTGAATTCTGCAATTCACATTACGTATCGCATTTC…	FN397387	SH180120.07FU	428	Fungi	p__Mortierellomycota	c__Incertae_sedis	o__Mortierellales	f__Mortierellaceae	g__Mortierella	s__Mortierella_sp	608	292222 Mortierella_sp	1.00003e-167	0.97	98.5981	0	0	0	0	0	0	0	0	0	0	0	0	0	0	0	0	0	0	2	0	0	0	0	0	0	0	0	0	0	0	0
>a8806	Otu01314	Saprotroph	TTAAGTTCAGCGGGTAGTCTTACTTGATTTGAGATCGAGTTTAACAAGAATCGTTGCCGACCCTTGTGAAATCCTGCATCAGTCAGCCAATACGGTCAAACTCCCTTTATGTTAGCTGCAGCAAAAGTAATAATCCGTTTGACGGGACTAAATGAATATGCTTTTAGCTCAGGAGAATGTCCAGCTGCACCTGCATTTCAAGCAACCCGCCACCGATCTGAAAAAGATTGGTGTTGGGATTGCTCAAGTCCAAAACTTTCAAAAAAAAATCCAAAAGCTTTGAGGTGTTTACTGATACTCAAACAAGCATGCTCTTCGGAATACCAAAGAGCGCAATATGCGTTCAAAGATTCGATGATTCACTGAATTCTGCAATTCACATTACGTATCGCATTTCGC…	HM240131	SH003980.07FU	426	Fungi	p__Mortierellomycota	c__Incertae_sedis	o__Mortierellales	f__Mortierellaceae	g__Mortierella	s__Mortierella_sp	450	313402 Mortierella_sp	3.58655e-168	0.98	98.5915	0	2	0	0	0	0	0	4	0	0	2	2	3	0	0	0	0	0	0	0	0	0	0	0	0	0	0	0	0	0	0
>a29661	Otu01315	Saprotroph	TTAAGTTCAGCGGGTAGTCTTACTTGATTTGAGATCGAGTTTTACAAGAGTCGTTTCCAACCCTTGTGAAATCCTGCATCAGTCAGCCAATACGGTCAGACTCCCTTTATGTTAGCTGCAGCAAAAGTAATAATCCGTTTGACGGGACTAAATAGATATGCTTATAGCTCAGGAGAATGTCCAGCTGCACCTGCATTTCAAGCAACCCTCCGCCGATCGTAAACGACTGGTGTTGGGATTGCTCAAGTCCAAAGCCATTCCAGAAAATAAATCAGAAATGTCTTTGAGGTGTTTACTGATACTCAAACAAGCATGCTCTTCGGAATACCAAAGAGCGCAATATGCGTTCAAAGATTCGATGATTCACTGAATTCTGCAATTCACATTACGTATCGCATT…	JQ666665	SH180117.07FU	430	Fungi	p__Mortierellomycota	c__Incertae_sedis	o__Mortierellales	f__Mortierellaceae	g__Mortierella	s__Mortierella_sp	393	292219 Mortierella_sp	1.34762e-172	0.98	98.6047	0	0	0	0	0	0	0	0	0	0	0	0	0	0	0	0	0	0	0	0	3	0	0	0	0	0	0	0	0	0	0
>a26891	Otu01362	Saprotroph	TTAAGTTCAGCGGGTAGTCTTACTTGATTTGAGATCGAGATTCAAAAAACGTTGTAGAAGTTTCCTCCGGCAACATTCTCTTCCTGCATCAGTCGAGCGCTGGACAAAGAGTGTGAAGTTGGCTGAAGCAAAGGATATAATCCGTATGACGGGATTAAGTATGAAATGCTCGTAGCCCACAATTGTCTGGCCGAACCTTGTATTTCGAGCATCCCCGGCATCACAGTGACTGAGATTAAGGGAAAAAAGGTGCTCAAATCCAACTTTTTTGCCATCTCCAAAGAGAAAGCATGTAAAAAAAAGCTGAGGGGTTTTTACTGATACTCAAACAAGCATGCTTTCCGGAATACCAGAAGGCGCAATATGCGTTCAAAGATTCGATGATTCACTGAATTCTGC…	EF619717	SH028770.07FU	452	Fungi	p__Mortierellomycota	c__Incertae_sedis	o__Mortierellales	f__Mortierellaceae	g__Mortierella	s__Mortierella_sp	307	325267 Mortierella_sp	4.33069e-83	0.78	98.6726	0	0	0	0	0	0	0	0	0	0	0	0	0	0	2	0	0	0	0	0	0	0	0	0	0	0	0	0	0	0	0
>a5182	Otu01359	Saprotroph	TTAAGTTCAGCGGGTAGTCTTACTTGATTTGAGATCGAGTTTACAAAGACAGCCGAAGCGGTCTTTGTGAATCCTGCATCAGTCAGCACAAGAACTAATCTCCTTTATGTTAGCTGCAGCAAAGGTAATAATCTGTTTTTGAGGCAGACTAAATAGATATGCTTATAGCTCAGAGAAAAGTCCAGCTGCACCTGCATTTCAAGTAACCCGCCACTTTATGAATAAAGCGTTGGGATCACTCAAGTCCAGCTCCATTTCAAGAAGAAAGGGAGTTGAGGTGTTTACTGATACTCAAACAAGCATGCTCTCCGGAATACCAGAGAGCGCAATATGCGTTCAAAGATTCGATGATTCACTGAATTCTGCAATTCACATTACGTATCGCATTTCGCTGCGTTC…	HQ630347	SH220322.07FU	419	Fungi	p__Mortierellomycota	c__Incertae_sedis	o__Mortierellales	f__Mortierellaceae	g__Mortierella	s__Mortierella_sp	278	309524 Mortierella_antarctica	7.50374e-167	0.99	97.136	0	0	0	0	0	0	0	0	0	0	0	0	0	0	0	0	0	0	0	0	0	0	0	0	0	0	0	0	0	0	0
>a59746	Otu01402	Saprotroph	TTAAGTTCAGCGGGTAGTCTTACTTGATTTGAGATCGAGTTTTACAAGAAGCTGTTGCCAGCCCTTGTGAAATCCTGCATCAGTCAGCCAATACGGTCAGACTCCCTTTATGTTAGCTGCAGCAAAAGTAATAATCCGTTTGACGGGACTAAATAAATATGCTTATAGCTCAGAAGAATGTCCAGCTGCACCTGCATTTCAAGCAGCCCTCCGTCAGTCGCGAGACTGATGTTGGGATTGCTCAAGTCCAAAGCTTTCAAACTGAATTGAAGGCTTTGAGGTGTTTACTGATACTCAAACAAGCATGCTCTTCGGAATACCAAAGAGCGCAATATGCGTTCAAAGATTCGATGATTCACTGAATTCTGCAATTCACATTACGTATCGCATTTCGCTGCG…	HQ630328	SH180143.07FU	422	Fungi	p__Mortierellomycota	c__Incertae_sedis	o__Mortierellales	f__Mortierellaceae	g__Mortierella	s__Mortierella_sp	194	292245 Mortierella_acrotona	4.34127e-161	0.97	97.1564	0	2	0	0	0	0	0	0	0	0	0	0	0	0	0	0	0	0	0	0	0	0	0	0	0	0	0	0	0	0	0
>a14298	Otu01404	Saprotroph	TTAAGTTCAGCGGGTAGTCTTACTTGATTTGAGATCGAGTTTACAAAGTCGGCCGAAGCCTGTCTTTGTGAATCCTGCATCAGTCAGCACAAGAACTAATCTCCTTTATGTTAGCTGCAGCAAAGGTAATAATCTGTTTTTTAGGCAGACTAAATAGATATGCTTATAGCTCAGAGAAAAGTCCAGCTGCACCTGCATTTCAAGTAACCCGCCACTTTTCGGTAAGGAAAAGCGTTGGGATCACTCAAGTCCAACTCCCATTTCAAAAAAGATATGGAAGTTGAGGTGTTTACTGATACTCAAACAAGCATGCTCTCCGGAATACCAGAGAGCGCAATATGCGTTCAAAGATTCGATGATTCACTGAATTCTGCAATTCACATTACGTATCGCATTTCG…	EU489899	SH183633.07FU	427	Fungi	p__Mortierellomycota	c__Incertae_sedis	o__Mortierellales	f__Mortierellaceae	g__Mortierella	s__Mortierella_sp	167	293679 Mortierella_sp	4.82027e-173	0.99	98.5948	0	0	0	0	0	0	0	0	0	0	0	0	0	0	0	0	0	0	0	0	0	0	0	0	0	0	0	0	0	0	0
>a20701	Otu01427	Saprotroph	TTAAGTTCAGCGGGTAGTCTTACTTGATTTGAGATCGAGTTTTCAAAAAGTCTTTGCAGACCCTCTGAGAAATCCTGCATCAGTCAGCACAATGACCATGTCTTCCTTTTATAAAGGTAAGCTGCAGCAATAAAATGAATAATCCGTTTTACGGGACTAACTAGATAATGCTTTTAGCCCAGAAGAATGATCGGCTGCACCTGCATTTGAAGCAACCCTCCATGTAATTAAATACACGTTGGGATATGCTCAAGTCCAATTTCAAAATAGAAAATCTTGAAATTGAGGTGTTTACTGATACTCAAACAAGCATGCTCTCCGGAATACCAGAGAGCGCAATGTGCGTTCAAAGATTCGATGATTCACTGAATTCTGCAATTCACATTACGTATCGCATTT…	JX270498	SH196187.07FU	429	Fungi	p__Mortierellomycota	c__Incertae_sedis	o__Mortierellales	f__Mortierellaceae	g__Mortierella	s__Mortierella_sp	140	299439 Mortierella_sp_16WV03A	3.61579e-168	0.97	98.6014	0	0	0	0	0	0	0	0	0	0	0	0	0	0	0	0	0	0	0	0	0	0	0	0	0	0	0	0	0	0	0
>a139343	Otu01442	Saprotroph	TTAAGTTCAGCGGGTAGTCTTACTTGATTTGAGATCGAGTTTTACAAGAATCGTTGCCGACCCTTGTGAAATCCTGCATCAGTCAGCCAAAACGGTCAAACTCCCTTTATATTAGCTGCAGCAAAAGTAATAATCCGTTTGACGGGACTAAATAAATATGCTTTTAGCTCAGAAGAATGTCCAGCTGCACCTGCATTTCAAGCAACCCGCCACCGATCTAAAAAAGATTGGTGTTGGGATTGCTCAAGTCCAAAACTATTTTTTAAAAATAAAAAAAGTTTTGAGGTGTTTACTGATACTCAAACAAGCATGCTCTTCGGAATACCAAAGAGCGCAATATGCGTTCAAAGATTCGATGATTCACTGAATTCTGCAATTCACATTACGTATCGCATTTCG…	JF461132	SH180110.07FU	427	Fungi	p__Mortierellomycota	c__Incertae_sedis	o__Mortierellales	f__Mortierellaceae	g__Mortierella	s__Mortierella_sp	131	292212 Mortierella_sp	2.76577e-167	0.97	98.5948	0	0	0	0	0	0	0	0	0	0	0	0	0	0	0	0	0	0	0	0	0	0	0	0	0	0	0	0	0	0	0
>a37872	Otu01455	Saprotroph	TTAAGTTCAGCGGGTAGTCTTACTTGATTTGAGATCGAGTTTACAAAGGCCAGCCGAAGCTGTCTCTGTGAATCCTGCATCAGTCAGCACAAGAACTAATCTCCTTTATGTTAGCTGCAGCAAAGGTAATAATCTGTTTTTTAGGCAGACTAAATAGATATGCTTATAGCTCAGAGAAAAGTCCAGCTGCACCTGCATTTCAAGTAACCCGCCGCTTTTCGGTGAGAAAAGCGTTGGGATCACTCAAGTCCAGCTCCCATTTCAAAAAAGAAAGGGGAGTTGAGGTGTTTACTGATACTCAAACAAGCATGCTCTCCGGAATACCAGAGAGCGCAATATGCGTTCAAAGATTCGATGATTCACTGAATTCTGCAATTCACATTACGTATCGCATTTCGC…	HQ630346	SH183634.07FU	426	Fungi	p__Mortierellomycota	c__Incertae_sedis	o__Mortierellales	f__Mortierellaceae	g__Mortierella	s__Mortierella_sp	113	293680 Mortierella_amoeboidea	1.68165e-169	0.99	97.1831	0	0	0	0	0	0	0	0	0	0	0	0	0	0	0	0	0	0	0	0	0	0	0	0	0	0	0	0	0	0	0
>a78840	Otu00010	Saprotroph	TTAAGTTCAGCGGGTAGTCTTACTTGATTTGAGATCGAGTTTACAAGTTCTGTTACAAACGAGTTTTCCTGCAATCAGCGTTGGTAGTTCATTCGACCTTTATATTAGCTGAAGCAAAAGTAATAATCCGTTTGACGGGACTAAATAGATATGCTTTTAGCTCAGAAGAATGTCCAGCTGCACCTGCATTTCAAGCGACCCTCCTCTTTCTGACGAAGGAGTCGGGATCGCTCAAATCCAATTCTCCCAACGCAAGCGCTAGGAGATTTGAGATGTTTACAGATACTCAAACAAGCATACTCTCCGGAATACCAGAGAGTGCAATGTGCGTTCAAAGATTCGATGATTCACTGAATTCTGCAATTCACATTACGTATCGCATTTCGCTGCGTTCTTCAT…	EF152531	SH187874.07FU	414	Fungi	p__Mortierellomycota	c__Incertae_sedis	o__Mortierellales	f__Mortierellaceae	g__Mortierella	s__Mortierella_sp	97	295576 Mortierella_sp	9.33433e-164	0.98	98.5507	0	0	0	0	0	0	0	0	0	0	0	0	0	0	0	0	0	0	0	0	0	0	0	0	0	0	0	0	0	0	0
>a108039	Otu01557	Saprotroph	TTAAGTTCAGCGGGTAGTCTTGCTTGATTTGAGATCGAGTTTACAGATCGCTTGCGCGACATGTTAAATCCTGCATCAGTCAGCCATAGCGACTCTTCAACCTTTATGTTAGCTGCAGCAAAAGTAATAATCCGTTTGACGGGATTAAATAAGTATGCTTATAGCTCAGAAGAAAGAATCTAGCTGCACCTGCATTTCAAGCAACCCGCCTTCTCTTTCGAAAAGTTGGGATTGCTCAAGTCCAAATTCCTCCAACAAGTAGAGGGATTTGAGGTGTTTACTGATACTCAAACAAGCATGCTCTCCGGAATACCAGAGAGCGCAATATGCGTTCAAAGATTCGATGATTCACTGAATTCTGCAATTCACATTACGTATCGCATTTCGCTGCGTTCTTCA…	HQ022258	SH208762.07FU	415	Fungi	p__Mortierellomycota	c__Incertae_sedis	o__Mortierellales	f__Mortierellaceae	g__Mortierella	s__Mortierella_sp	81	304642 Mortierella_sp	2.12127e-170	0.99	98.5542	0	0	0	0	0	0	0	0	0	0	0	0	0	0	0	0	0	0	0	0	0	0	0	0	0	0	0	0	0	0	0
>d108233	Otu01656	Saprotroph	TTAAGTTCAGCGGGTAGTCTTACTTGATTTGAGATCGAGTTTAACAGAGGTACTTCGCTTGCGCTAGATACCACTGTAAATTCCTGCATCAGTCAGCTATAGGATCAATCTTCCTTTATGTTAGCTGCAGCAAAAGTAATAATCCGTTTGACGGGACTAAATAAGTTATGCTTTTAGCTCAGAAGATTGTCCAGCTGCACCTGCATTTCAAGCGACCCGCCACTCGATCCGAAGATGTTGTGTTGGGTTCGCTCAAGTCCAATTCCCATTTTTTCCTTTTGACGGGAGAAAGTGGGATTTGAGGTGTTTACTGATACTCAAACAAGCATGCTCTCCGGAATACCAGAGAGCGCAATATGCGTTCAAAGATTCGATGATTCACTGAATTCTGCAATTCAC…	KC008734	SH478840.07FU	445	Fungi	p__Mortierellomycota	c__Incertae_sedis	o__Mortierellales	f__Mortierellaceae	g__Mortierella	s__Mortierella_sp	59	330695 Mortierella_sp_38249_8	3.88792e-172	0.99	93.2584	0	0	0	0	0	0	0	0	0	0	0	0	0	0	0	0	0	0	0	0	0	0	0	0	0	0	0	0	0	0	0
>a75343	Otu01613	Saprotroph	TTAAGTTCAGCGGGTAGTCTTACTTGATTTGAGATCGAGTTTACAAAGTCAGCCGAAGCTGCCTCTGTGAATCCTGCATCAGTCAGCACAAGAACTAGTCTCCTTTATGTTAGCTGCAGCAAAGGTAATAATCTGTTTTTTAGGCAGACTAAATAGATATGCTTATAGCTCAGAGAAAAGTTCAGCTGCACCTGCATTTCAAGCAACCCGCCACTTTCTTGGAAGAAAGCGTTGGGATCACTCAAGTCCAGCTCCAATTTCAAAAAAGAAAAAGGAGTTGAGGTGTTTACTGATACTCAAACAAGCATGCTCTCCGGAATACCAGAGAGCGCAATATGCGTTCAAAGATTCGATGATTCACTGAATTCTGCAATTCACATTACGTATCGCATTTCGCTG…	EF126342	SH183636.07FU	424	Fungi	p__Mortierellomycota	c__Incertae_sedis	o__Mortierellales	f__Mortierellaceae	g__Mortierella	s__Mortierella_sp	57	293682 Mortierella_sp	2.82779e-171	0.99	98.3491	0	0	0	0	0	0	0	0	0	0	0	0	0	0	0	0	0	0	0	0	0	0	0	0	0	0	0	0	0	0	0
[truncated: 1,075 more rows]
[truncated: 285 more columns]

## Sheet: Table S5
Table S5. Tukey post-hoc test of significant variables for the overall fungal richness in roots and soil
Tukey post-hoc test for root fungal richness between the cultivars
	Least significant mean	SE	Arielle	Erika	Ranomi	Esmee	Viviana	Glorietta	Catania	Solist	Champion	Madeleine	Mariska	Concordia	Antonia	Karlena	Laudine	Fontane	Bellefleur	Rosagold	Excellency	Manitou	Merlot
Arielle	0.350749	0.301101		1	0.99965	1	1	1	1	0.630503	0.998792	0.999959	0.999748	0.789933	0.99882	0.999664	0.415354	0.999227	0.999997	0.999894	1	1	0.959064
[truncated: 75 more rows]

## Sheet: Table S6
Table S6. Tukey post-hoc test of significant variables for the pathogen fungal richness in roots and soil
[truncated: 29 more rows]

[truncated: 6 more sheets: Table S7, Table S8, Table S9, Table S10, Table S11, Table S12]
